# Supplementary material for: The genomic basis of evolutionary differentiation among honey bees
Source: Genome Res. 2021 Jul;31(7):1203–15. doi: 10.1101/gr.272310.120 (PMC8256857; doi:10.1101/gr.272310.120)
Supplement: Supplemental Material [file supp_gr.272310.120_Supplemental_Table_S5_JD_edit.xlsx]

## Sheet: Ador specific genes
Supplemental Table S5: Excel file with lists of lineage specific gene models for each of the three Apis species, with automated annotation evidence and coding sequences (Ador specifc genes / Aflo specific genes / Amel specific genes). The last sheet (GO Results) lists the results of the Gene Ontology enrichment analyses.
Order	3B ID	NCBI GeneID	NCBI Symbol	NCBI Description	interpro_ids	interpro_names	interpro_descriptions	PANTHER_ids	PANTHER_names	PIRSF_ids	PIRSF_names	PRINTS_ids	PRINTS_names	PRINTS_descriptions	Pfam_ids	Pfam_names	Pfam_descriptions	ProDom_ids	ProDom_descriptions	ProSitePatterns_ids	ProSitePatterns_names	ProSitePatterns_descriptions	ProSiteProfiles_ids	ProSiteProfiles_names	ProSiteProfiles_descriptions	SMART_ids	SMART_names	SUPERFAMILY_ids	SUPERFAMILY_names	TIGRFAM_ids	TIGRFAM_names	TIGRFAM_descriptions	KEGG_ids	KEGG_names	MetaCyc_ids	MetaCyc_names	Reactome_ids	Reactome_names	Bombus	Contaminant	Max_num_exons	GO_BP_ID	GO_BP_Name	GO_MF_ID	GO_MF_Name	GO_CC_ID	GO_CC_Name	Coding Sequence
1	ADOR3B61630	102670605	LOC102670605	late cornified envelope-like proline-rich protein 1-like	NA	NA	NA	NA	NA	NA	NA	PR00021	PRORICH	Small proline-rich protein signature	NA	NA	NA	NA	NA	NA	NA	NA	NA	NA	NA	NA	NA	NA	NA	NA	NA	NA	NA	NA	NA	NA	NA	NA	NA	NA	4	NA	NA	NA	NA	NA	NA	ATGTCGTGTTATCGCTCTTGCTGTTCTCCATGCTGCTCTCCACCATCCTGTCCTCCNCCATCCTGTCCTCCATCATCCTGTCCTCCACCCTGTCCACCACCCTGTCCACCACCCACTATCGTATGCAGACCAGCCTGCCCCCCTCGTTGCCCCCCTCAACCAACTAAAACAACAGTTTACCTACGGCCTTGTACGCCTTGTCCACCCTGTTGCGCCATTCCTTGCCCGCCAAAGGTCGTCGTTGCGTGTGCACCACCCCCACCCCCCTGTCCACCACCGCCTCCAAGCGTAACCTTCGTTTGTACCAAGAAGATAGTCCCCTGTATGCCGTGTCCACCGCCAACACCACCCCCCTGTTCTCCTTGTCGTACGATTTGCAGTTAG
2	ADOR3B68883	102670691	LOC102670691	ATP-dependent RNA helicase A-like	NA	NA	NA	NA	NA	NA	NA	NA	NA	NA	NA	NA	NA	NA	NA	NA	NA	NA	NA	NA	NA	NA	NA	NA	NA	NA	NA	NA	NA	NA	NA	NA	NA	NA	NA	NA	4	NA	NA	NA	NA	NA	NA	ATGGGCATCAAACACCTCAACATGAAGGTGTTCGCGATTACGATTCTTTTGGCGCTCGTAGCCACTGCCTATGCCGGTTACATAAGCAGCGGTTGGTCTGGTGGAGGTGGTGGCTGGAATGGAGGTGGCGGTGGCTGGTCTGGTGGCGGTGGTGGTGGCGGCTGGAAGTACGGAGGTGGTGGAGGTGGAGGCGGAGGTGGCGGAAAAATCATCAAAGTGATCACTGTTAGCGGTGGAGGCGGTGGATGGCCTAGTGGGGGCGGTGGTGGATGGGCTGGAGGTGGTGGCGGATGGCCGAGTGGTGGCAGTGGTGGATGGAAAGGAGGATGGAGCGGTGGTGGTGGTGGATGGAGCGGTGGTGGTGGTGGAGGCGGCTGGTGGTAA
3	ADOR3B62199	102671437	LOC102671437	uncharacterized LOC102671437	NA	NA	NA	NA	NA	NA	NA	NA	NA	NA	NA	NA	NA	NA	NA	NA	NA	NA	NA	NA	NA	NA	NA	NA	NA	NA	NA	NA	NA	NA	NA	NA	NA	NA	NA	NA	3	NA	NA	NA	NA	NA	NA	AACAGGTTCGTAATATTATTATGCGCTGATATAATCGTAATGAGGAGATTAATCAATCCTTTAAGAAGGGGGGGAAAAAAAAAAAAAAGAAAGGAAATAACTCATCCAAATATTTTCCTTTAC
4	ADOR3B65667	102672211	LOC102672211	probable serine/threonine-protein kinase kinX-like	NA	NA	NA	NA	NA	NA	NA	NA	NA	NA	NA	NA	NA	NA	NA	NA	NA	NA	NA	NA	NA	NA	NA	NA	NA	NA	NA	NA	NA	NA	NA	NA	NA	NA	NA	NA	1	NA	NA	NA	NA	NA	NA	GAGGAACCTACGAAGGAAGAAGAAGAACGGAAGACGGAGGAGCCTACGAAGGAAGAAGAAGAACGGAAGACGGAGGAGCCTACGAAGGAAGAAGAAGAACGGAAGACGGAGGAGCCTACGAAGGAAGAAGAAGAACGGAAGACGGAGGAGCCTACGAAGGAAGAAGAAGAACGGAAGACGGAGGAGCCTACGAAGGAAGAAGAAGAACGGAAGACGGAGGAGCCTACGAAGGAAGAAGAAGAACGGAAGACGGAGGAGCCT
5	ADOR3B63889	102672486	LOC102672486	putative protein TPRXL-like	NA	NA	NA	NA	NA	NA	NA	NA	NA	NA	NA	NA	NA	NA	NA	NA	NA	NA	NA	NA	NA	NA	NA	NA	NA	NA	NA	NA	NA	NA	NA	NA	NA	NA	NA	NA	1	NA	NA	NA	NA	NA	NA	TCGCCTTCTTCCTCTTCTTCTTCTGCTTCCCCTTCTTTCTCTTCTTCCTCTTTTTCCTCTTCTTCGCCTTCTTCCCCTTCTTCCGCTTCTTCCCCTTCTTACTCTTTTTCC
6	ADOR3B63890	102673418	LOC102673418	uncharacterized LOC102673418	NA	NA	NA	NA	NA	NA	NA	NA	NA	NA	NA	NA	NA	NA	NA	NA	NA	NA	NA	NA	NA	NA	NA	NA	NA	NA	NA	NA	NA	NA	NA	NA	NA	NA	NA	NA	1	NA	NA	NA	NA	NA	NA	TTTTCTTCCTCTTCTTCGCCTTCTTCCCCTTTTTCCTCTTCTTCCTTTTCTTCCTCTTCTTCCCCTT
7	ADOR3B68317	102673480	LOC102673480	uncharacterized LOC102673480	NA	NA	NA	NA	NA	NA	NA	NA	NA	NA	NA	NA	NA	NA	NA	NA	NA	NA	NA	NA	NA	NA	NA	NA	NA	NA	NA	NA	NA	NA	NA	NA	NA	NA	NA	NA	2	NA	NA	NA	NA	NA	NA	ATGCATTGGCCGCCACCCGGAAAACGATGCTTCTCTTCCAATTCGAGTGCGAAACTGTCACGCGCCACGAAACGACGAAAAATCGAGGGTGGAGCGAGCTTTTATCTTTTAAGGGGAAAAGGAAACGTTTCGAAATTCGTCTCGTCTCTTCGTTTTTCGTGA
8	ADOR3B67131	102674180	LOC102674180	putative uncharacterized protein DDB_G0277255-like	NA	NA	NA	NA	NA	NA	NA	NA	NA	NA	NA	NA	NA	NA	NA	NA	NA	NA	NA	NA	NA	NA	NA	NA	NA	NA	NA	NA	NA	NA	NA	NA	NA	NA	NA	NA	1	NA	NA	NA	NA	NA	NA	CCGCCGTCGTCGTCGCCGTCGTCGTCGTCGTCGTCGTCGTCGTCGCCGCCGTCGTCGTCGCCGTCGTCGTCGTCGTCGTCGTCGTCGTCGTCCTCGTCGTTATCGTCATTGTCGTCGTCGTCGTCGTCATCGTTGTGGTTGTCGTCATATTCTCATCCTTATCGACAACGTACGCAGCCTGTGATACTATAA
9	ADOR3B69860	102674509	LOC102674509	mucin-2-like	NA	NA	NA	NA	NA	NA	NA	NA	NA	NA	NA	NA	NA	NA	NA	NA	NA	NA	NA	NA	NA	NA	NA	NA	NA	NA	NA	NA	NA	NA	NA	NA	NA	NA	NA	NA	1	NA	NA	NA	NA	NA	NA	AAACTACAACCGAAAGCCCAACTCTACCAACCACTACAACTACTGTAGTTCCTACTACAACTGAAGAAACAACTTTAACCACGACAACATCGCCAGAAACAACTACAACAACGACTATTACCACAACACCTGTGCCAGCAACTATAACGGAAAGTCCAACTCCGCCAACCACTACAACTACT
10	ADOR3B69865	102675150	LOC102675150	mucin-2-like	NA	NA	NA	NA	NA	NA	NA	PR01217	PRICHEXTENSN	Proline rich extensin signature	NA	NA	NA	NA	NA	NA	NA	NA	NA	NA	NA	NA	NA	NA	NA	NA	NA	NA	NA	NA	NA	NA	NA	NA	NA	NA	1	NA	NA	NA	NA	NA	NA	ATGACAACAACGCCGGAAACTACATCTACATCAACAACCATTATCACAACAACTACGCTAGAAACTACAACGGAAAGTTCAACTCCGCCGACCACTACGATTGAGGTTACTCCTACTACAACCGAAGAAACAACTGTAACCATGATAACATCGCCGGAAACAACTACACCAACGACTGTTACTACAATATTTATACCAGAAACTACAACGGAAATTTTAACTCCGCCAACTACAACTACTATTGTTCCTACTACAACTGAAGAAACAACTATAACCACGACAACATCTCCAGAAACAACAACTATACCGACAACTATTACCACAACACCTACGCCAGAAACTACAACGGAAAGTCCATTTCCGCCAATCACTACAACTACTGTAGTTCCTACTACAACC…
11	ADOR3B67417	102675242	LOC102675242	uncharacterized LOC102675242	NA	NA	NA	NA	NA	NA	NA	NA	NA	NA	NA	NA	NA	NA	NA	NA	NA	NA	NA	NA	NA	NA	NA	NA	NA	NA	NA	NA	NA	NA	NA	NA	NA	NA	Y	NA	3	NA	NA	NA	NA	NA	NA	ATGTTTTCTATGAATTTATTTAAAGTTAATTTTTTTAAACGATTAAAATATTTTCATAATAATACTAATATTATGATTAATAATTATGCATTAATCAATAAAAAATGTAATGTATTCTTATCGATGAAATCAGTATTGTATCCAGATCGTAAAATAATTTATATATTTCCTTATATTAAAATTCCTTATATATTAAATAAAATAAAGCGTAATTGCACAATTCTTTTTGGTGCATATATACCAATAACTGTATCTTTACACATGTGGAATTATATAACATTAAATGAAAATTTAAATACTTTATTTTACACTTTTTTATTAACCTTCATATTACATGTTATTACTCGTCCATGTAATAATTCAGTTGGATCAATATATCTCCAAGAAAGTGAAAAAGAT…
12	ADOR3B66346	102675602	LOC102675602	autophagy-related protein 11-like	NA	NA	NA	NA	NA	NA	NA	NA	NA	NA	NA	NA	NA	NA	NA	NA	NA	NA	NA	NA	NA	NA	NA	NA	NA	NA	NA	NA	NA	NA	NA	NA	NA	NA	NA	NA	2	NA	NA	NA	NA	NA	NA	ATGGAGGAATCTATGGAGGAATCTATGGAGGAATCTATGGAGGAATCTATGGACGAATCTATGGAGAAATCTATGGACGAATCTATGGAGAAGTCTATGGACAAATCTATGGACGAATCTATAGAGAAATCTATGGACGAATCTATGGAGAAATCTATGGAAGAATCTATGGAAGAATCTATAGAGAAATCTATAGAGGAATCTATGGAAGAATCTATGGAGGAATCTATGGAAGAATCTATGGAAGAATCTATGGAGGAATCTATGAATGAATCTATAGGGGAATTTATGAAGAAATCTATGGAGGAAATCTATGGAGGAATCTATAGACATTATATGAATACAGGAGATACACCTAATCCACATAATCTAATCAACTGA
13	ADOR3B69872	102676256	LOC102676256	mucin-2-like	NA	NA	NA	NA	NA	NA	NA	NA	NA	NA	NA	NA	NA	NA	NA	NA	NA	NA	NA	NA	NA	NA	NA	NA	NA	NA	NA	NA	NA	NA	NA	NA	NA	NA	NA	NA	1	NA	NA	NA	NA	NA	NA	ATGTCGCCAGAAACTACAACAGAAAGTCTACCACCTACAACAACTGAGGTTACTCCTACCACAACTGAAGAAACAACTGTAACCACAACAACGTCACCAAAAACAACAACTACACTAACTACTATTACTGCAACACCTTTTCCAGAAACTACAACGGAAATCACAACTGCGCCACTCACTACAACTCCTGCAATTCGTACCACCACTGAAGAAACCACTGCAACTACGACTACGTCGCCAGAAACAACAACTACACGAACTACAATGACCGCAACTCCTGTGCCGGAAACTACCACGGAACATCCAACTCTGCCACCCACTACAACAACGGTGACTCCTACTACTATTAAAGAAGTTACCATAACCACAACAACATCGCCGGAAACAACAACTAAACCA…
14	ADOR3B63849	102676370	LOC102676370	gelsolin-related protein of 125 kDa-like	NA	NA	NA	NA	NA	NA	NA	NA	NA	NA	NA	NA	NA	NA	NA	NA	NA	NA	NA	NA	NA	NA	NA	NA	NA	NA	NA	NA	NA	NA	NA	NA	NA	NA	NA	NA	1	NA	NA	NA	NA	NA	NA	ATGGAAGAGGAGGTGGCGATGGAGGTGGTGATGGAGGTGGTGATGGAGGTGGCGATGGAGGTGGCGATGGAGGTGGCGATGGAGGTGGTGAAGGAGGAAGAAGTGATTGTGGATGAAGAGGATAAGGAGGCGAAGTTTGAGGTGGAGGTGGAGGTGGCGATGGAGGTGGCGATGGAGGAGGCGATGGAGGTGGCGATGGAGGAGGCGATGGAGGTGGCGATGGAGGAGGCGATGGAGGTGGCGATGGAGGAGGCGATGGAGGTGGCGATGGAGGAGGCGATGGAGGTGGCGATGGAGGAGGCGATGGAGGTGGCGATGGAGGAGGCGATGGAGGTGGCGATGGGGGCGGTGAAGGAGGAAGAAGTGATTGTGGATGAAGAGGATAAGGAGGCGAAGTTT…
15	ADOR3B63850	102676512	LOC102676512	RNA-binding protein 25-like	NA	NA	NA	NA	NA	NA	NA	NA	NA	NA	NA	NA	NA	NA	NA	NA	NA	NA	NA	NA	NA	NA	NA	NA	NA	NA	NA	NA	NA	NA	NA	NA	NA	NA	NA	NA	1	NA	NA	NA	NA	NA	NA	AGACAAAAGGAGAGACTGAGGAAGAGACTGAGGGAGAGACAGAAGGAGAGGGAGAGGGAGAGACAGAGGAAAAGACTAAGGAAGAGACTGAAGGAGAGACAGAGAGAGAGATAG
16	ADOR3B63049	102676639	LOC102676639	calphotin-like	NA	NA	NA	NA	NA	NA	NA	NA	NA	NA	NA	NA	NA	NA	NA	NA	NA	NA	NA	NA	NA	NA	NA	NA	NA	NA	NA	NA	NA	NA	NA	NA	NA	NA	NA	NA	3	NA	NA	NA	NA	NA	NA	ATGAAGACAGTGTGCGTCGTACTCCTGGTCGCGGCGGTGGCGTCCGCCGGACTGGTCCCCGCCGCCCCTTTGGCCGTGGCCCCAGCTGTGGCCGCTGTTCCAGCGCCCATCGTCACCGCTAGAAGCAGTCAAGTCGTTGCCAGGAATTACAACACGTTGGCCGCCGCGCCGCTCGCGGCCGTCGCCGCGCCATTGCACGCCGCGTACCCACCGGTCGCCGTGGCCGCGGCTCCGCTTCACGCGGCACCGCTCCCGTACGCAGCGCTCAACTATCCCGCTGGCAGCCGCTCGACTGGTCAAGCATCATTCGACTGTCAGCGATCTCAGCCGCTATTCCCAGTACGAATTTCTCGAGCCGTTTTTCTCTCGTCGAGTAGAAATCATACGACTGCAGCAACC…
17	ADOR3B63851	102676644	LOC102676644	neurofilament light polypeptide-like	NA	NA	NA	NA	NA	NA	NA	NA	NA	NA	NA	NA	NA	NA	NA	NA	NA	NA	NA	NA	NA	NA	NA	NA	NA	NA	NA	NA	NA	NA	NA	NA	NA	NA	NA	NA	2	NA	NA	NA	NA	NA	NA	ATGGAAGCTGTTGCTTTCAGGGAGACTAAGGGAGAGACAGAGGGAGAGACAGAGGAAGAAACTGAGGGAGAAACAGAGGAAAAGAGAGAAGGAGACAGAGAGACAAAGGGAGAGACAGAGGGAGAAACTGAGGGAGAGACTGAGGAAGAGACAAAGGGAGAGATTGAAGGAGAGGGAGAGACAGAGGGAGAGACTGAGGGAGAGACAGAGGAAGAGACAGAGGGAAAGACAGAGGGAGACTAA
18	ADOR3B62794	102677149	LOC102677149	cuticle protein 16.5, isoform B-like	NA	NA	NA	NA	NA	NA	NA	NA	NA	NA	NA	NA	NA	NA	NA	NA	NA	NA	NA	NA	NA	NA	NA	NA	NA	NA	NA	NA	NA	NA	NA	NA	NA	NA	NA	NA	3	NA	NA	NA	NA	NA	NA	ATGAAATCCCTGTTAATCCTCTTCGCCATCGTTGCCGTTGTGGCAGCCTTCCCCGAACTAGAAAGGGAACGCCGAGGGGTCATCGCGGCCCCAGCCTTGGCAGCGGTACCTCTTGCACCCACTATTGCTCTCGCAGCCCCTAAAATCGCTCCTGCTATCGCTCTCGCACCCGCTCCTAAACTTCTCGCGGCGCCAGCAGTTGTAGCCGCCCCAGGCCCGTGGAAAGCATGGTAA
19	ADOR3B62120	102679530	LOC102679530	collagen alpha-2(IV) chain-like	NA	NA	NA	PTHR34785;PTHR34785:SF3	FAMILY NOT NAMED;ECA1 GAMETOGENESIS RELATED FAMILY PROTEIN-RELATED	NA	NA	NA	NA	NA	NA	NA	NA	NA	NA	NA	NA	NA	NA	NA	NA	NA	NA	NA	NA	NA	NA	NA	NA	NA	NA	NA	NA	NA	NA	NA	6	NA	NA	NA	NA	NA	NA	ATGCTAGGTATTTCTGAAGTATCAGATGTGCCAGGAATTCCAGGTGTGTCAGAAATTCCAGGTGTGCCAGAAGTTCCAGGTATGCCAGGAGTGCTAGATGTGCCAGGATTTGCAGGCATGCCAGAAGTTCCAGGTGTGCCAGGACTTCCAGGTGTGGTAGAACTTTCTGATGTGCCTGAAGTTCCAGGTGTTCCAGAAGTACCAGAAGTTCCAGGTGTGCCAGGACTTCCAGGTATGACAGAACTTTCTGATGTACCAGGAATTCCAGATGTACCCGGGCTTCCAGGTGTGGCAGGAGTGCTAGATGTGCCAGGACTTGCAGGTGTGCCAGAAATTCCAGATGTGCCAGAAGTTCCTGAAGTGCCAGGAGTTCCTGGTGTGCCAGGACTTCCAGATGTG…
20	ADOR3B61209	102679769	LOC102679769	glutamic acid-rich protein-like	NA	NA	NA	NA	NA	NA	NA	NA	NA	NA	NA	NA	NA	NA	NA	NA	NA	NA	NA	NA	NA	NA	NA	NA	NA	NA	NA	NA	NA	NA	NA	NA	NA	NA	NA	NA	3	NA	NA	NA	NA	NA	NA	ATGCTAAATCGGAGAGATAATAAAGATAAAAATAAAGATAAGCCGCCCCCGGATCCTCACAGAGAGTTCTTGGACGCTGAGTCCACCGACGAGGAGGAGAGGCGATACGAAGAGGTGGTCGAAGAGGAGCTTAGACCGGTTTTCGATGACGAGGAATTGATGGAGCTGGGCGGTGATGACGAAGATCGTGTGGATGGGGAAGGTGATGATGAAGATGATGAGAATGGTGAAAATTATGAGGATAATGATGATGATGACGATGAGGAGGAAGAGGAACAGGAAGAGGATGATTAG
21	ADOR3B62953	102680697	LOC102680697	helicase SWR1-like	NA	NA	NA	NA	NA	NA	NA	NA	NA	NA	NA	NA	NA	NA	NA	NA	NA	NA	NA	NA	NA	NA	NA	NA	NA	NA	NA	NA	NA	NA	NA	NA	NA	NA	NA	NA	3	NA	NA	NA	NA	NA	NA	ATGACAGTGGAGGATTTGGAGGTGGAGGCGGATATGGAGGCGGCGGTGGTGGTGGAGGAGGAATCATCGAACATCATGGTGGCGGAGGATTTGGAGGCGGAGGCGGTGGATACGGAGGTGGAGGCGGAGGTTTCGATGATCATCACGGCGGCGGAGGATTTGGAGGCGGAGGCGGTGGATATGGAGGTGGAGGCGGAGGATTCGATGACCACCACGGTGGTGGAGGATTTGGTGGTGGTGGTGGTGGTGGTGGTTTTGATGATCATCACGGTGGAGGAGGATTTGGAGGCGGAGGCGGAGGCGGATATGGAAGTGGTGGCGGTGGATTCGATGCACACCGCGGTGGAGGAGGATTTGGAGGCGGAGGCGGAGGCGGATATGGAAGTGGTGGCGGTGGAT…
22	ADOR3B61632	102680735	LOC102680735	uncharacterized LOC102680735	NA	NA	NA	NA	NA	NA	NA	NA	NA	NA	NA	NA	NA	NA	NA	NA	NA	NA	NA	NA	NA	NA	NA	NA	NA	NA	NA	NA	NA	NA	NA	NA	NA	NA	NA	NA	2	NA	NA	NA	NA	NA	NA	ATGTCTCTCGTTTTCGACACCGGAGCGGAAAAATATGGAAAATCACACGGAATACGAGAAGCAGAAAACTCGAATATAAGTATACAAATCGAGATTAGCGTTGCAGAAAAGTTTTCGAATATCGAAGGATAA
23	ADOR3B80513	NA	NA	NA	IPR000515;IPR001734;IPR017452	MetI-like;Na/solute_symporter;GPCR_Rhodpsn_7TM	ABC transporter type 1, transmembrane domain MetI-like;Sodium/solute symporter;GPCR, rhodopsin-like, 7TM	NA	NA	NA	NA	PR00303	SECYTRNLCASE	Preprotein translocase SecY subunit signature	NA	NA	NA	NA	NA	NA	NA	NA	PS50262;PS50283;PS50928	G_PROTEIN_RECEP_F1_2;NA_SOLUT_SYMP_3;ABC_TM1	G-protein coupled receptors family 1 profile.;Sodium:solute symporter family profile.;ABC transporter integral membrane type-1 domain profile.	NA	NA	NA	NA	NA	NA	NA	NA	NA	NA	NA	NA	NA	NA	NA	1	GO:0006810 GO:0055085	transport;transmembrane transport	GO:0005215	transporter activity	GO:0016020 GO:0016021	membrane;integral component of membrane	ATGGCCCAACCCTTGCTTGTGATGGCCGTGTTGCTCCACGTAACCAGAGTGGAGGTGGTGTTCCGCGTGCTTGTGGCCGTTCTCGTGACGATGCTCGTGGCTGTGGTCGTCGAAATGCTTGTGGCGCTCCTCGTGGGAATGGCCGTGCTTGTGCTCGTGAGACGCGTGATGTTTGTGGTGCTCGTGATGATGGTGCCCCTCGTGATGATCGTGGTGGTGTTCGTGCTCGTGGCCGTGCTTGTGCTCCTCCTTGTGCTCGTGGCCGTGCTTGTGCTCCTCGTGGTGGTGATGCTTGTGATCCTGGTGATGGGAGTGGTGGTGGTCCTCGTGATGGCCGTGACGATGCTCCTCCTTGTGCCCGTGCTTGTGCTCGTGGCCGTGCTTGTGGTGATGGTCCTC…
24	ADOR3B81210	NA	NA	NA	IPR001734	Na/solute_symporter	Sodium/solute symporter	NA	NA	NA	NA	NA	NA	NA	NA	NA	NA	NA	NA	NA	NA	NA	PS50283	NA_SOLUT_SYMP_3	Sodium:solute symporter family profile.	NA	NA	NA	NA	NA	NA	NA	NA	NA	NA	NA	NA	NA	NA	NA	1	GO:0006810 GO:0055085	transport;transmembrane transport	GO:0005215	transporter activity	GO:0016020	membrane	ATGAAAGGCGTTTCTGTAGTTGTGTTAATAACTTCTATTATTGGTGTCGTCACTGTAGTGGTGGGAATTGTCGTTTCTGTTGTTTCCGTTGTTACAGTAGTTATAGGAGTAGTCACTGTTATTATTACAGTTTCAGTTGTGGTTTCTGTTGTTAAAGTAGTAACGAACGGTGTTTCTGTAGTAGTGGTTGTAACCTCTATTGTTGGTGTAATTACTGTAGTGGGAGTAATAGGAGTTGTTTCCGTTGTTATAGTAGTAACTGGAGTGGTCACTGTTGTGAGAATTGTAGTTTCAGTTGTGGTTTCTGTTGTTATCGTAATAATGAAAGGCGTTTCCGTAGTGGTGTTAACTTCTATTATTGGTATAATCACTGTAGTCGTAATAGTGGGAGTTATTTCC…
25	ADOR3B80610	NA	NA	NA	IPR002494	KAP	Keratin-associated protein	NA	NA	NA	NA	NA	NA	NA	PF13885	Keratin_B2_2	Keratin, high sulfur B2 protein	NA	NA	NA	NA	NA	NA	NA	NA	NA	NA	NA	NA	NA	NA	NA	NA	NA	NA	NA	R-HSA-6805567	Keratinization	NA	NA	1	NA	NA	NA	NA	GO:0045095	keratin filament	ATGGCTTATAAAACTGCTGCTTATAGAACTGCTGCTTACAGAATTGCTGCTTGTAGAACTATTGCTTACAGAACTGCTGCTTGTAGAACTGCTGCTTACAGAACTGCTGCTTGTAGAACTGCTGCTTGTAGAACTGCTGCTTGTAAAATTGCTGCTTATAGAACTGCTGCTTATAGAACTGCTACTTGTAGAACTGCTGCTTGTAGAACTGCTGCTTGTAGAACTGCTGCTTGTAGAACTGCTGCTTATAGAACTGCTGCTTGTAGAACTGCTGCTTATAAAAACACTGCTTATAAAAACGCTGCTTATAAAAATGTTGCTTATAAAAATGCTGCTTAA
26	ADOR3B80860	NA	NA	NA	IPR005819;IPR007220	Histone_H5;ORC2	Histone H5;Origin recognition complex, subunit 2	PTHR14052;PTHR14052:SF1	ORIGIN RECOGNITION COMPLEX SUBUNIT 2;ORIGIN RECOGNITION COMPLEX SUBUNIT 2	NA	NA	PR00624	HISTONEH5	Histone H5 signature	NA	NA	NA	NA	NA	NA	NA	NA	NA	NA	NA	NA	NA	NA	NA	NA	NA	NA	NA	NA	NA	NA	R-HSA-113507;R-HSA-176187;R-HSA-68616;R-HSA-68689;R-HSA-68827;R-HSA-68867;R-HSA-68949;R-HSA-68962;R-HSA-69298;R-HSA-69300	E2F-enabled inhibition of pre-replication complex formation;Activation of ATR in response to replication stress;Assembly of the ORC complex at the origin of replication;CDC6 association with the ORC:origin complex;CDT1 association with the CDC6:ORC:origin complex;Assembly of the pre-replicative complex;Orc1 removal from chromatin;Activation of the pre-replicative complex;Association of licensing …	NA	NA	1	GO:0006260 GO:0006334	DNA replication;nucleosome assembly	GO:0003677	DNA binding	GO:0000786 GO:0000808 GO:0005634	nucleosome;origin recognition complex;nucleus	ATGAAGACCAAGGTGATCAAGAGAAAGAAGAAGAAGAGGAGGAAGAAGAGGAAGAAGAAGAAGAACAGAAAGAAGAGGAAGAAGAGGAAGAGGAAGAAGAAGAAGAAGAAGAAGAAGAAGAAGAAAAGAAAGAAGAAGAAGGAGAAGAGGAGGAAGAAGAGGAAGAAGAGGAAAAAGAAGAAGAAGAAAAAAAAGAAGAAGAAGAAGAGGAGGAAGAAGAGGAAGAAGAGCAAAAAGAAGAAGAAGAAGAGGAAAAAGAAGAGGAAGAAGAGGAGGAAGAAGAGGAAGAAGAGGNNNNNNNNNNNNNNNNNNNNNNNNNNNNNNNNNNNNNNNNNNNNNNNNNNNNNNNNNNNNNNNNNNNNNNNNNNNNNNNNNNNNNNNNNNNNNNNNNNNNNNNNN…
27	ADOR3B80024	NA	NA	NA	IPR008160	Collagen	Collagen triple helix repeat	NA	NA	NA	NA	NA	NA	NA	PF01391	Collagen	Collagen triple helix repeat (20 copies)	NA	NA	NA	NA	NA	NA	NA	NA	NA	NA	NA	NA	NA	NA	NA	NA	NA	NA	NA	NA	NA	NA	NA	1	NA	NA	NA	NA	NA	NA	GAATTCCAGATGTACCCGGGCTTCCAGGTGTGGCAGGAGTGCTAGATGTGCCAGGACTTGCAGGTGTGCCAGAAATTCCAGATGTGCCAGAAGTTCCTGAAGTGCTAGGAGTTCCTGGTGTGCCAGGACTTCCAGATGTGCCAGGAGTTCCAGGTGTGCTAGGGGTTCCAGGTGTATCAGGAGTTCCAGATGTGCCAGGAGTTCCAGGTGTTCCAGGAGTTCCAGGAGTTCCAGGTGTGCCAGGAGTTCCAGGTGTGCCAGGAGTTCCAGGT
28	ADOR3B80979	NA	NA	NA	IPR023616	Cyt_c_oxase-like_su1_dom	Cytochrome c oxidase-like, subunit I domain	NA	NA	NA	NA	NA	NA	NA	NA	NA	NA	NA	NA	NA	NA	NA	NA	NA	NA	NA	NA	SSF81442	Cytochrome c oxidase subunit I-like	NA	NA	NA	00190+1.9.3.1	Oxidative phosphorylation	PWY-3781;PWY-4521;PWY-6692;PWY-7279	Aerobic respiration I (cytochrome c);Arsenite oxidation I (respiratory);Fe(II) oxidation;Aerobic respiration II (cytochrome c) (yeast)	R-HSA-5628897;R-HSA-611105	TP53 Regulates Metabolic Genes;Respiratory electron transport	NA	NA	3	GO:0006264 GO:0009060 GO:0030431 GO:0055114 GO:1901214	mitochondrial DNA replication;aerobic respiration;sleep;oxidation-reduction process;regulation of neuron death	GO:0004129 GO:0005506 GO:0020037	cytochrome-c oxidase activity;iron ion binding;heme binding	GO:0016021 GO:0045277	integral component of membrane;respiratory chain complex IV	ATGGCAAAAGGAGATCGATTAGAATCGAAATACAAAGGGAAGGTATTAGCAGGTGCTATTACAATATTATTATTTGATCGAAATTTTAATATTTTTGATCCAATAGGAGGAGGTGATCCATTAACGAGATTTTTCGTATCTTTAAAGTTGCATACTCTACGAATCCTCGAATCGTTCGTGTCGAACTTGGCATTTACAGGGTCGCGATCAGATCGGTCATCGCCGCCCACGCGTAACACCGCGGTGAACAATGCTCCCCTTCCCTCTCGATTTCTCGAAACTGCTACAACAAGAACCTCGACGATCTCCGTTTACGTGTTGCACGTGGTGTTGATCTCACCTTTGAGAGTTGACGATGAAA
29	ADOR3B81322	NA	NA	NA	NA	NA	NA	PTHR32093;PTHR32093:SF59	FAMILY NOT NAMED;SUBFAMILY NOT NAMED	NA	NA	NA	NA	NA	NA	NA	NA	NA	NA	NA	NA	NA	NA	NA	NA	NA	NA	NA	NA	NA	NA	NA	NA	NA	NA	NA	NA	NA	NA	NA	5	NA	NA	NA	NA	NA	NA	ATGACGAATGCGAATGACGCTTCTCTACGCACGCCATATTGCTTGAAATTGTCGCATAGGACTGAAAAGCGCTCAGAGCGCTCGTCGCGACTCTTCTTAAAAACAAAAGAACTTTTAGATGGCGTCACCAACGGTAAAAAGGAAGAGAGGCGTAATTTGAATCTCATCATTCATACGCGATGGGAATTCATTATTTTTTCACAAAGTGCACCGAGTTCTTACACCGAAGAAACGGATAATTTCCACCCACGCGCTCGCCTTCCACCCTTGCACCCACGTCATCACCTACGCCCCCTCCATCCCACGCTCCAACACCCTCCAACGACCATCTTCAACCCCCTAAAATCAATTCCTTCCAATTTACCGCAATTCGTTTCGATAGAAGAATTTCATGGTGAT…
30	ADOR3B82222	NA	NA	NA	NA	NA	NA	PTHR31750;PTHR31750:SF5	FAMILY NOT NAMED;SUBFAMILY NOT NAMED	NA	NA	NA	NA	NA	NA	NA	NA	NA	NA	NA	NA	NA	NA	NA	NA	NA	NA	NA	NA	NA	NA	NA	NA	NA	NA	NA	NA	NA	NA	NA	2	NA	NA	NA	NA	NA	NA	ATGGAAGATTTGACGGGGTGGAGTGGTTCCTCCTTTTCGAATCGAATGAATTCTCAAACATTGCGAAAAAAAGAAAGAAAGAAGGAAGAAGAAAAGAAGACAGAAGGAAAGAAGGAAAAAAAGGAAAAAAGGAAGAAGAAAAGAAGGAAAGAAGGAAAGAAGGAAAGAAGGATAGAAGGAAAGAAGGACAGAAAGAAAGAAAGAAAAAAGGAAAGAAGGAAAGAAGAAAAGAAAGAAAGAAGGAAAGAAGGAAAGAAGGACAAAAGGAAAGAAGAAAAGAAAGAAAGAAGGAAAGAAGAAAAGAAGAAAAGAAGGAAAGAAGGACAAAAGGAAAGAAGAAAAGAAGGAAAGAAGGAAAAAAGGAAAGAAGGAAAGAAGGAAAGAAGAAAAGAAGGAAAG…
31	ADOR3B80035	NA	NA	NA	NA	NA	NA	PTHR25952;PTHR25952:SF210	FAMILY NOT NAMED;SUBFAMILY NOT NAMED	NA	NA	NA	NA	NA	NA	NA	NA	NA	NA	NA	NA	NA	NA	NA	NA	NA	NA	NA	NA	NA	NA	NA	NA	NA	NA	NA	NA	NA	NA	NA	1	NA	NA	NA	NA	NA	NA	ATGTTCTTTGAAACCAATGAGAACAAAGACACAACATACCAGAATCTCTGGGACACATTCAAAGCAGTGTGTAGAGGGAAATTTATAGCACTAAATGCCCACAAGAGAAAGCAGGAAAGATCCAAAATTGACACCCTAACATCACAATTAAAAGAACTAGAAAAGCAAGAGCAAACACATTCAAAAGCTAGCAGAAGGCAAGAAATAACTAAAATCAGAGCAGAACTGAAGGAAATAGAGACACAAAAAACCCTTCAAAAAATTAATGAATCCAGGAGCTG
32	ADOR3B90053	NA	NA	NA	NA	NA	NA	PTHR13585;PTHR13585:SF13	FAMILY NOT NAMED;ZINC FINGER CCCH DOMAIN-CONTAINING PROTEIN 13	NA	NA	NA	NA	NA	NA	NA	NA	NA	NA	NA	NA	NA	NA	NA	NA	NA	NA	NA	NA	NA	NA	NA	NA	NA	NA	NA	NA	NA	NA	NA	1	NA	NA	NA	NA	NA	NA	ATGGCCGAACGAGCCGAGAATCGTCCCTTTTCACTCCCTAACGAAGCTCCCCCCTCCCGGTCGCCGAAACCACGGCACTCGTTTTGCTCCATTTCGACTTCGTTAAACTTCCGTGGCGGGGTTGGATTCTCGATCGAGAGAGAGAGAGAGAGAGAGAGAGAGAGAGAGAGAGAGAGAGAGAGAGAGAGAGAGAGAGAGAGAGAGAGAGAGAGAGAGAGAGAGAGAGAGAGAGAGAGAGAGAGAGAGAGAGAGAGAGAGAGAGAGAGAGAGAGAGAGAGAGAGAGAGAGAGAGAGAGAGAGAGAGAGAGAGAGAGAGAGAGAGAGAGAGAGAGAGAGAGAGAGAGAGAGAGAGAGAGAGAGAGAGAGAGAGAGAGAGAGAGAGAGAGAGAGAGAGAGAGA…
33	ADOR3B80072	NA	NA	NA	NA	NA	NA	NA	NA	NA	NA	PR01217	PRICHEXTENSN	Proline rich extensin signature	NA	NA	NA	NA	NA	NA	NA	NA	NA	NA	NA	NA	NA	NA	NA	NA	NA	NA	NA	NA	NA	NA	NA	NA	NA	NA	1	NA	NA	NA	NA	NA	NA	AAACAACTGCAACTACGACAACGTCGCCAGAAACAACAACTACACTAACAACTATAACTACAACTACATTAATAACCATCACCACAACACCTATACCAGAAACTACAACGGAAAGCACAACTCCACCAACCACTACAACTACTGTAATTCCTACAACAACTGAAACAACAACTGTAACTATGACAACATCGCCAGAAACTACAACTACACTAACAACGTTTACTACAACATCTGCGCCAGAAACTACAATCAAAAGTCCAACTCCGCCAACTACAACAACAACTGTAGTTCCCACGACAACTGAAGAAACAACTGTAACTACAACGACGTCGCCAGAAACTACAACTGCACCAACAACTATTACTACAACACCTACGCCAGAAACTACAACGGAAA
34	ADOR3B80429	NA	NA	NA	NA	NA	NA	NA	NA	NA	NA	PR01217	PRICHEXTENSN	Proline rich extensin signature	NA	NA	NA	NA	NA	NA	NA	NA	NA	NA	NA	NA	NA	NA	NA	NA	NA	NA	NA	NA	NA	NA	NA	NA	NA	NA	3	NA	NA	NA	NA	NA	NA	ATGGGGAGTTTGCAAAGTTTCGAGATTCAAGAGCGGTGCTCTCAATACGACAAGCCACCGCCACCGTCACCGCCGCCGCCACCACCACCATTGCCACTACCACCACCACCACCACCACCGCCACCACCGCCACCACCACCACCACCACCGCCACCACCGCCACCACCACCACCACCACCGCCACCACCGCCACCACCACCACCACCACCGCCACCACCGCCACCACCACCACCACCACCGCCACCACCGCCACCACCACCACCACCACCGCCACCACCGCCACCACCACCACCACCACCGCCACCACCGCCACCACCACCACCACCACCGCCACCACCGCCACCACCACCACCACCACCGCCACCACCGCCACCACCACCACCACCACCGCCACCACCG…
35	ADOR3B82510	NA	NA	NA	NA	NA	NA	NA	NA	NA	NA	PR01217	PRICHEXTENSN	Proline rich extensin signature	NA	NA	NA	PD968187	BETA-DEFENSIN ANTIBIOTIC PRECURSOR ANTIMICROBIAL DEFENSIN BETA SIGNAL DEFENSIN BD-32 DEFB-32	NA	NA	NA	NA	NA	NA	NA	NA	NA	NA	NA	NA	NA	NA	NA	NA	NA	NA	NA	NA	NA	2	NA	NA	NA	NA	NA	NA	ATGGAGGGAATGAAGGAGAGGAGGGCAGATTACACTTTGCCTGAAACAAAAGGCGCGCCTCCTCCTCTTCCTCTTCCATCTCCTCCTCCTCCACTTCCATCTCCACCTCCTCCACCTTCTGTACCTTCACCTCTTCTACCACCTCCTCCTCCTCCTCTTCCTTCTCCTCCTCCTCTTCCTCCACCTCCTCTTCCACCTCCTCCACCTCCTCCTCCACCTCCTCCACCTCCACCTCTTCCTATTCTTCCATCTCCTTCTCTTGCTCCACCTCCTTCTCTTCCTCCACCTCCTCCTCCTCCTCCTCCACCTCCTCTTCCTCCACCTCCTCCTCCACCTCCTCCATCTCCACTACCTCCTCCACATCCACCTCCTCTTCCACCTCCACCTCTTCCTCCATCT…
36	ADOR3B10065	NA	NA	NA	NA	NA	NA	NA	NA	NA	NA	NA	NA	NA	NA	NA	NA	NA	NA	NA	NA	NA	NA	NA	NA	NA	NA	NA	NA	NA	NA	NA	NA	NA	NA	NA	NA	NA	NA	NA	1	NA	NA	NA	NA	NA	NA	ATGGCTCGCCACGAGGTCGAGGGTTTTAATCTACGACCACTCGATGCCCATCAACCCCCCACCCTTTTCTCTTCGTCTAAAAGTTGTGGAGATCACGTGCAACCACCCTCATCGAGTCAAAGTTCTTACGGTTCCCGAGATCGCGCAAAGGTCAAGGAATGGATCGCGGTCAAGATGCATGTCGGTGTGACTTTAGCTTGTGGAACGTTCGAGTTGGAAACGAAAGCAGAATGGAGACAACGACCCGATGAAGCTGTTAATCTTGATCTCATCGCTTCGAAGTAA
37	ADOR3B10165	NA	NA	NA	NA	NA	NA	NA	NA	NA	NA	NA	NA	NA	NA	NA	NA	NA	NA	NA	NA	NA	NA	NA	NA	NA	NA	NA	NA	NA	NA	NA	NA	NA	NA	NA	NA	NA	NA	NA	1	NA	NA	NA	NA	NA	NA	ATGAAATTTGTGGAAAGAATT
38	ADOR3B10211	NA	NA	NA	NA	NA	NA	NA	NA	NA	NA	NA	NA	NA	NA	NA	NA	NA	NA	NA	NA	NA	NA	NA	NA	NA	NA	NA	NA	NA	NA	NA	NA	NA	NA	NA	NA	NA	NA	NA	1	NA	NA	NA	NA	NA	NA	CGTAGCACATGTTACGGTTACTCGAGCCCGGTAACAAAGGAGAAACCCTATCGAGATGCGGTCGTCTTGGAATTCTGGACGCTGGCCAAGCCGGTTATCCAGCAGACCGGGGCGGCCACCTGGCCACGAACATCGGGTGTGAACGGATCGAGGACGAACGTGGGCAAAGACGACGACAGCGCGGCTCACCCTGGACGGAGACGTGGTTAA
39	ADOR3B10265	NA	NA	NA	NA	NA	NA	NA	NA	NA	NA	NA	NA	NA	NA	NA	NA	NA	NA	NA	NA	NA	NA	NA	NA	NA	NA	NA	NA	NA	NA	NA	NA	NA	NA	NA	NA	NA	NA	NA	1	NA	NA	NA	NA	NA	NA	ATGATAACTCCGACTACTGATCCGAAGAGAATTTTTAAACCG
40	ADOR3B10306	NA	NA	NA	NA	NA	NA	NA	NA	NA	NA	NA	NA	NA	NA	NA	NA	NA	NA	NA	NA	NA	NA	NA	NA	NA	NA	NA	NA	NA	NA	NA	NA	NA	NA	NA	NA	NA	NA	NA	1	NA	NA	NA	NA	NA	NA	ATGGATACGCGAGCTCGGGGTGGAGGCAGCCTTTCGCATATCAACTACACGCGAGATGGCTCCAGTCCTCGTGCCATCCTTCCACACGTTCCTCCACTTGCGGCTTGCCATCTCGAGCGTATCGAGCCTCGCCGACCATCTTCTTTCCCCTTTTCCATCCCTCGAGACGTATCCGTTTCGTTTCTACCTCTTGCCCGATCCCTCTGGTCGTCTCTCCTCTTCGTCTTTTTCCCTCCTTTCTCCTCGCTATTATTCTTCGTTCGCTCGGTATCCGCTAGCTTCTTCGCTTTGTTTCTTTGTTCGATTCGCCGCATCCTCGCCCTTTCTCCCTACCCCTTTCAGCCTGACTCCTTCACCAAAGACCTTCTTCGAATCTTCTTCCGCTATTCTTTTTCCTTC…
41	ADOR3B10312	NA	NA	NA	NA	NA	NA	NA	NA	NA	NA	NA	NA	NA	NA	NA	NA	NA	NA	NA	NA	NA	NA	NA	NA	NA	NA	NA	NA	NA	NA	NA	NA	NA	NA	NA	NA	NA	NA	NA	1	NA	NA	NA	NA	NA	NA	ATGAAAATATCATGCCGCGATTACGGAGGGTTAAAGGAATTTCGCGAAGGGGGTGTGTGTATATATATATATATATATATNNNNNNNNNNNNNNNNNNNNNNNNNNNNNNNNNNNNNNNNNNNNNNNNNNNNNNNNNNNNNNNNNNNNNNNNNNNNNNNNNNNNNNNNNNNNNNNNNNNNNNNNNNNNNNNNNNNNNNNNNNNNNNNNNNNNNNNNNNNNNNNNNNNNNNNNNNNNNNNNNNNNNNNNNNNNNNNNNNNNNNNNNNNNNNNNNNNNNNNNNNNNNNNNNNNNNNNNNNNNNNNNNNNNNNNNNNNNNNNNNNNNNNNNNNNNNNNNNNNNNNNNNNNNNNNNNNNNNNNNNNNNNNNNNNNNNNNNNNNNNNNNNNNNNNNNNNNNNNN…
42	ADOR3B10428	NA	NA	NA	NA	NA	NA	NA	NA	NA	NA	NA	NA	NA	NA	NA	NA	NA	NA	NA	NA	NA	NA	NA	NA	NA	NA	NA	NA	NA	NA	NA	NA	NA	NA	NA	NA	NA	NA	NA	1	NA	NA	NA	NA	NA	NA	CATTTCCACCATTACCAGAATCATTTAATGAAGAAAACAGACTTGCACAACTGGAACGTATGA
43	ADOR3B10650	NA	NA	NA	NA	NA	NA	NA	NA	NA	NA	NA	NA	NA	NA	NA	NA	NA	NA	NA	NA	NA	NA	NA	NA	NA	NA	NA	NA	NA	NA	NA	NA	NA	NA	NA	NA	NA	NA	NA	14	NA	NA	NA	NA	NA	NA	ATGACATTATTAATTTATATATTAAATTTTCAATATTATATTATATTATTTCTATTTTATTATTTAATTTATAGATATTTCAGTAAATATTTGATAAATCGGAATGAATTCAAAATTGAAAAAAATGTAAAGCAAAAAAAATTAATCACAATTATATATTTTTCTTTTTACTTTTTTNNNNNNNNNNNNNNNNNNNNNNNNNNNNNNNNNNNNNNNNNNNNNNNNNNNNNNNNNNNNNNNNNNNNNNNNNNNNNNNNNNNNNNNNNNNNNNNNNNNNNNNNNNNNNNNNNNNNNNNNNNNNNNNNNNNNNTCCATCTTCTCTTTTCAAGTAATTCTTTTTTTTTTATTGATATAACAAAAAAAATTGAATAG
44	ADOR3B10671	NA	NA	NA	NA	NA	NA	NA	NA	NA	NA	NA	NA	NA	NA	NA	NA	NA	NA	NA	NA	NA	NA	NA	NA	NA	NA	NA	NA	NA	NA	NA	NA	NA	NA	NA	NA	NA	NA	NA	7	NA	NA	NA	NA	NA	NA	NNNNNNNNNNNNNNNNNNNNNNNNNNNNNNNNNNNNNNNNNNNNNNNNNNNNNNNNNNNNNNNNNNNNNNNNNNNNNNNNNNNNNNNNNNNNNNNNNNNNNNNNNNNNNNNNNNNNNNNNNNNNNNNNNNNNNNNNNNNNNNNNNNNNNAGAGAGAGAGAGAGAGAGAGAGAGAGAGAGAGAGAAATTATAA
45	ADOR3B10745	NA	NA	NA	NA	NA	NA	NA	NA	NA	NA	NA	NA	NA	NA	NA	NA	NA	NA	NA	NA	NA	NA	NA	NA	NA	NA	NA	NA	NA	NA	NA	NA	NA	NA	NA	NA	NA	NA	NA	1	NA	NA	NA	NA	NA	NA	ATGCACGCGTCGTTTCCGTACGACGGCGGACGCAGTAGCGGCGGAGGCGGAGGAGGCGGAGGCGGAGGTGGAGGTGGAGGTGGCGGNNNNNNNNNNNNNNNNNNNNNNNNNNNNNNNNNNNNNNNNNNNNNNNNNNNNNNNNNNNNNNNNNNNNNNNNNNNNNNNNNNNNNNNNNNNNNNNNNNNNNNNNNNNNNNNNNNNNNNNNNNNNNNNNNNNNNNNNNNNNNNNNNNNNNNNNNNNNNNNNNNNNNNNNNNNNNNNNNNNNNNNNNNNNNNNNNNNNNNNNNNNNNNNNNNNNNNNNNNNNNNNNNNNNNNNNNNNNNNNNNNNNNNNNNNNNNNNNNNNNNNNNNNNNNNNNNNNNNNNNNNNNNNNNNNNNNNNNNNNNNNNNNNNNNNNNN…
46	ADOR3B10775	NA	NA	NA	NA	NA	NA	NA	NA	NA	NA	NA	NA	NA	NA	NA	NA	NA	NA	NA	NA	NA	NA	NA	NA	NA	NA	NA	NA	NA	NA	NA	NA	NA	NA	NA	NA	NA	NA	NA	1	NA	NA	NA	NA	NA	NA	ATGGTTCACACATGTGCGAGACAAATTTTTCGAAAATTGTCACCGTGTTACCGTACCGATTATACACCACCATATACATATGTACATATACATATACATATATATATATATATACATACATATATACTTAAAATGTATATTAGTCACTCGATGATCCACTCGAACATCTCACAAACCTTTTCTTTATTTCTTCTCTCTCCCTTCTCCCCCCGGCCTTCCAGTCGTTTGTAA
47	ADOR3B10827	NA	NA	NA	NA	NA	NA	NA	NA	NA	NA	NA	NA	NA	NA	NA	NA	NA	NA	NA	NA	NA	NA	NA	NA	NA	NA	NA	NA	NA	NA	NA	NA	NA	NA	NA	NA	NA	NA	NA	2	NA	NA	NA	NA	NA	NA	ATGAGTTTCGACTTGAATGGAGATTGGGATTGGGCTGCTGGTCGATTGGACATTAAACAAGAAGTTGAAAGTATAAAACTGGAATTTATGAAGATCGATTATAGAATGGAAGGGGAACGTTTAATGGGCTTGGAATGTTTGGATTTGGACAATGTTTGTATTGGACAAATTTTAGGTTGA
48	ADOR3B10850	NA	NA	NA	NA	NA	NA	NA	NA	NA	NA	NA	NA	NA	NA	NA	NA	NA	NA	NA	NA	NA	NA	NA	NA	NA	NA	NA	NA	NA	NA	NA	NA	NA	NA	NA	NA	NA	NA	NA	1	NA	NA	NA	NA	NA	NA	ATGACCGGTGGCCGGGGTAGGATAGGTAGATCGCGCGCTCGATTCGACCAGCTTTCTTTCTCTTTCCTCGACGATCGATCGATCGACCGNNNNNNNNNNNNNNNNNNNNNNNNNNNNNNNNNNNNNNNNNNNNNNNNNNNNNNNNNNNNNNNNNNNNNNNNNNNNNNNNNNNNNNNNNNNNNNNNNNNNNNNNNNNNNNNNNNNNNNNNNNNNNNNNNNNNNNNNNNNNNNNNNNNNNNNNNNNNNNNNNNNNNNNNNNNNNNNNNNNNNNNNNNNNNNNNNNNNNNNNNNNNNNNNNNNNNNNNNNNNNNNNNNNNNNNNNNNNNNNNNNNNNNNNNNNNNNNNNNNNNNNNNNNNNNNNNNNNNNNNNNNNNNNNNNNNNNNNNNNNNNNNNNNNNN…
49	ADOR3B10896	NA	NA	NA	NA	NA	NA	NA	NA	NA	NA	NA	NA	NA	NA	NA	NA	NA	NA	NA	NA	NA	NA	NA	NA	NA	NA	NA	NA	NA	NA	NA	NA	NA	NA	NA	NA	NA	NA	NA	2	NA	NA	NA	NA	NA	NA	ATGCCAGATTATCCTCACTACGCAAAGCCCGTTTCGCGAATTGGATTATGCACCGAAGGCATAACCAATAATCATACTTCTGTCGCGTTCAGAATTCTAAATCCGGTGTTCTAA
50	ADOR3B10951	NA	NA	NA	NA	NA	NA	NA	NA	NA	NA	NA	NA	NA	NA	NA	NA	NA	NA	NA	NA	NA	NA	NA	NA	NA	NA	NA	NA	NA	NA	NA	NA	NA	NA	NA	NA	NA	NA	NA	1	NA	NA	NA	NA	NA	NA	GTGCAACAATAG
51	ADOR3B11019	NA	NA	NA	NA	NA	NA	NA	NA	NA	NA	NA	NA	NA	NA	NA	NA	NA	NA	NA	NA	NA	NA	NA	NA	NA	NA	NA	NA	NA	NA	NA	NA	NA	NA	NA	NA	NA	NA	NA	1	NA	NA	NA	NA	NA	NA	ATGAATTCTCAGAAATTAAAAAGAAAAATGTATATTTTCTCATATGAAGATACAAAAGTTATGGTACAAGAGTCGAGGCAGTAA
52	ADOR3B11039	NA	NA	NA	NA	NA	NA	NA	NA	NA	NA	NA	NA	NA	NA	NA	NA	NA	NA	NA	NA	NA	NA	NA	NA	NA	NA	NA	NA	NA	NA	NA	NA	NA	NA	NA	NA	NA	NA	NA	1	NA	NA	NA	NA	NA	NA	ATGCGAATTTTACGGTTCGTTCGTGGACTAGCAACTAGCAAAAATCGAGATTTTTTTTTCCCCCCTCTCCTCCTCTCTCCTGTATTNNNNNNNNNNNNNNNNNNNNNNNNNNNNNNNNNNNNNNNNNNNNNNNNNNNNNNNNNNNNNNNNNNNNNNNNNNNNNNNNNNNNNNNNNNNNNNNNNNNNNNNNNNNNNNNNNNNNNNNNNNNNNNNNNNNNNNNNNNNNNNNNNNNNNNNNNNNNNNNNNNNNNNNNNNNNNNNNNNNNNNNNNNNNNNNNNNNNNNNNNNNNNNNNNNNNNNNNNNNNNNNNNNNNNNNNNNNNNNNNNNNNNNNNNNNNNNNNNNNNNNNNNNNNNNNNNNNNNNNNNNNNNNNNNNNNNNNNNNNNNNNNNNNNNNNNN…
53	ADOR3B11057	NA	NA	NA	NA	NA	NA	NA	NA	NA	NA	NA	NA	NA	NA	NA	NA	NA	NA	NA	NA	NA	NA	NA	NA	NA	NA	NA	NA	NA	NA	NA	NA	NA	NA	NA	NA	NA	NA	NA	1	NA	NA	NA	NA	NA	NA	GGCTTCCAGCGTCCGCGGTCCTGA
54	ADOR3B11127	NA	NA	NA	NA	NA	NA	NA	NA	NA	NA	NA	NA	NA	NA	NA	NA	NA	NA	NA	NA	NA	NA	NA	NA	NA	NA	NA	NA	NA	NA	NA	NA	NA	NA	NA	NA	NA	NA	NA	1	NA	NA	NA	NA	NA	NA	ATGAAAGCTGGAAAAATAAATTTTGTGATCATCAATGGAACTGGAATACAAAATCGCCTAAAAACTATTATTTCTTACAACTTTGATTTTGCAAAAGCTACAAAAACAAATTTTGTTGTATCTCAATTCTTGTCGACTATTTTACAAACGACTCTAGCTCAAAAATTACTGTTACTATTACCATCTTCACTTAAATCCCAATACACATTTCACTCCACATTTCAAACTAGCTACCCCTAA
55	ADOR3B11130	NA	NA	NA	NA	NA	NA	NA	NA	NA	NA	NA	NA	NA	NA	NA	NA	NA	NA	NA	NA	NA	NA	NA	NA	NA	NA	NA	NA	NA	NA	NA	NA	NA	NA	NA	NA	NA	NA	NA	1	NA	NA	NA	NA	NA	NA	ATGCGGGCAGCATACATTGGCGGCGGTCCCACGGACGTGCCCTACGTACNNNNNNNNNNNNNNNNNNNNNNNNNNNNNNNNNNNNNNNNNNNNNNNNNNNNNNNNNNNNNNNNNNNNNNNNNNNNNNNNNNNNNNNNNNNNNNNNNNNNNNNNNNNNNNNNNNNNNNNNNNNNNNNNNNNNNNNNNNNNNNNNNNNNNNNNNNNNNNNNNNNNNNNNNNNNNNNNNNNNNNNNNNNNNNNNNNNNNNNNNNNNNNNNNNNNNNNNNNNNNNNNNNNNNNNNNNNNNNNNNNNNNNNNNNNNNNNNNNNNNNNNNNNNNNNNNNNNNNNNNNNNNNNNNNNNNNNNNNNNNNNNNNNNNNNNNNNNNNNNNNNNNNNNNNNNNNNNNNNNNNNNNNNNNN…
56	ADOR3B11160	NA	NA	NA	NA	NA	NA	NA	NA	NA	NA	NA	NA	NA	NA	NA	NA	NA	NA	NA	NA	NA	NA	NA	NA	NA	NA	NA	NA	NA	NA	NA	NA	NA	NA	NA	NA	NA	NA	NA	1	NA	NA	NA	NA	NA	NA	GTATGGTGTAGCTTTTTATAG
57	ADOR3B11337	NA	NA	NA	NA	NA	NA	NA	NA	NA	NA	NA	NA	NA	NA	NA	NA	NA	NA	NA	NA	NA	NA	NA	NA	NA	NA	NA	NA	NA	NA	NA	NA	NA	NA	NA	NA	NA	NA	NA	1	NA	NA	NA	NA	NA	NA	ATTATAATGGTCTTGTGGATAAAAATGATAATAGTTATGGTGGAAGTGATGATGATGATGATGGTAATAGTGGTGGTGATGACGTTGACGATGACGATAACAATGTTGACGTCGCCTACGACGACGACGACGATGATAACGAAGAAGACGAAGAAGACGACGACGGCGACGACGAAGACGACGTCGACGATGATAATGATAATAATGACAATTGTAATAAGACTGAAAATGATATTGATAATGTTGTTGACTCCAATACGAACATTGCTTGCTTTCCATGGCCTT
58	ADOR3B11517	NA	NA	NA	NA	NA	NA	NA	NA	NA	NA	NA	NA	NA	NA	NA	NA	NA	NA	NA	NA	NA	NA	NA	NA	NA	NA	NA	NA	NA	NA	NA	NA	NA	NA	NA	NA	NA	NA	NA	1	NA	NA	NA	NA	NA	NA	ATGTCCTATATTAGTATTAATGTAGTATTGTTTTTTTTTTTTTTTTTTTTTTTTTTTTTTTTTTTTTTTTTTTTTTTTTTTTTTTTTNNNNNNNNNNNNNNNNNNNNNNNNNNNNNNNNNNNNNNNNNNNNNNNNNNNNNNNNNNNNNNNNNNNNNNNNNNNNNNNNNNNNNNNNNNNNNNNNNNNNNNNNNNNNNNNNNNNNNNNNNNNNNNNNNNNNNNNNNNNNNNNNNNNNNNNNNNNNNNNNNNNNNNNNNNNNNNNNNNNNNNNTGA
59	ADOR3B11741	NA	NA	NA	NA	NA	NA	NA	NA	NA	NA	NA	NA	NA	NA	NA	NA	NA	NA	NA	NA	NA	NA	NA	NA	NA	NA	NA	NA	NA	NA	NA	NA	NA	NA	NA	NA	NA	NA	NA	1	NA	NA	NA	NA	NA	NA	ATGCAATTTACACTGGAATTGAAACAATTAAACTTCATTTTTCCCCCATTCACCCTCCCCTTCCTCGTTCCAGCGATATTCAGATTATTACATTGTTGGGCTCGAGCGCGTTTTCACGAGGAAATGCTGCCGCTTGGACGGTTACGACATTCGGTCGACGAACGAATTTTCATACGAATATATATTTTATATACGTATTGGACCCCCTTTCGACGAGATTCCCCCTTCGAGAGATTCGTGAGATTCGCTTCCGTCCATTGTCGAAAAAAATTACCGTCAATTTCCTTCCTAATTGCGTATCACTTTTCACTTTCTCCTCCCTCCCTTGTAATTTCCCTCCTCCCCTCCCTCCTCTTCCACTCTCGGTTTCCAATGTTTCCAATGTGA
60	ADOR3B11753	NA	NA	NA	NA	NA	NA	NA	NA	NA	NA	NA	NA	NA	NA	NA	NA	NA	NA	NA	NA	NA	NA	NA	NA	NA	NA	NA	NA	NA	NA	NA	NA	NA	NA	NA	NA	NA	NA	NA	1	NA	NA	NA	NA	NA	NA	ATGAAGGAGAGGCGAGCGAAAGAGNNNNNNNNNNNNNNNNNNNNNNNNNNNNNNNNNNNNNNNNNNNNNNNNNNNNNGGCGGATAGGAGCGAGAGAGGAGGTCAGAGCCGATCCGTTCGAAACCTTCCTTCTCCTTCCTTCTCTCTGTCTCTCTCGCTCCGACCGCTACCTTCTCCGCAACCCTCCAACGTCTTTCTCTTTCTGTCTCCCTTTCTCTCTCTCTCTCGTCGCGGAGGGTAG
61	ADOR3B12031	NA	NA	NA	NA	NA	NA	NA	NA	NA	NA	NA	NA	NA	NA	NA	NA	NA	NA	NA	NA	NA	NA	NA	NA	NA	NA	NA	NA	NA	NA	NA	NA	NA	NA	NA	NA	NA	NA	NA	1	NA	NA	NA	NA	NA	NA	ATGTTATTTTCCCGGAAAGTTTGGTACGCGAGCGAAATACAGGTGAGAAGGTGGGGAAGGGAGGGGGGNNNNNNNNNNNNNNNNNNNNNNNNNNNNNNNNNNNNNNNNNNNNNNNNNNNNNNNNNNNNNNNNNNNNNNNNNNNNNNNNNNNNNNNNNNNNNNNNNNNNNNNNNNNNNNNNNNNNNNNNNNNNNNNNNNNNNNNNNNNNNNNNNNNNNNNNNNNNNNNNNNNNNNNNNNNNNNNNNNNNNNNNNNNNNNNNNNNNNNNNNNNNNNNNNNNNNNNNNNNNNNNNNNNNNNNNNNNNNNNNNNNNNNNNNNNNNNNNNNNNNNNNNNNNNNNNNNNNNNNNNNNNNNNNNNNNNNNNNNNNNNNNNNNNNNNNNNNNNNNNNNNNNNNNNNN…
62	ADOR3B12184	NA	NA	NA	NA	NA	NA	NA	NA	NA	NA	NA	NA	NA	NA	NA	NA	NA	NA	NA	NA	NA	NA	NA	NA	NA	NA	NA	NA	NA	NA	NA	NA	NA	NA	NA	NA	NA	NA	NA	1	NA	NA	NA	NA	NA	NA	ATGGAAATAAAAGGTTCTTCTGAT
63	ADOR3B12203	NA	NA	NA	NA	NA	NA	NA	NA	NA	NA	NA	NA	NA	NA	NA	NA	NA	NA	NA	NA	NA	NA	NA	NA	NA	NA	NA	NA	NA	NA	NA	NA	NA	NA	NA	NA	NA	NA	NA	1	NA	NA	NA	NA	NA	NA	ATGCTTGTAATTTTGTTGTGCAGTTTGGCGATGAGAGTGATGCAAAAGATGTGCAAAAGGTGCAGAGTATAA
64	ADOR3B12248	NA	NA	NA	NA	NA	NA	NA	NA	NA	NA	NA	NA	NA	NA	NA	NA	NA	NA	NA	NA	NA	NA	NA	NA	NA	NA	NA	NA	NA	NA	NA	NA	NA	NA	NA	NA	NA	NA	NA	1	NA	NA	NA	NA	NA	NA	ATGGGAAGCATCAGTTATCTCGTCGTCAATCTGACCGAAGGTANNNNNNNNNNNNNNNNNNNNNNNNNNNNNNNNNNNNNNNNNNNNNNNNNNNNNNNNNNNNNNNNNNNNNNNNNNNNNNNNNNNNNNNNNNNNNNNNNNNNNNNNNNNNNNNNNNNNNNNNNNNNNNNNNNNNNNNNNNNNNNNNNNNNNNNNNNNNNNNNNNNNNNNNNNNNNNNNNNNNNNNNNNNNNNNNNNNNNNNNNNNNNNNNNNNNNNNNNNNNNNNNNNNNNNNNNNNNNNNNNNNNNNNNNNNNNNNNNNNNNNNNNNNNNNNNNNNNNNNNNNNNNNNNNNNNNNNNNNNNNNNNNNNNNNNNNNNNNNNNNNNNNNNNNNNNNNNNNNNNNNNNNNNNNNNNNNNN…
65	ADOR3B12265	NA	NA	NA	NA	NA	NA	NA	NA	NA	NA	NA	NA	NA	NA	NA	NA	NA	NA	NA	NA	NA	NA	NA	NA	NA	NA	NA	NA	NA	NA	NA	NA	NA	NA	NA	NA	NA	NA	NA	1	NA	NA	NA	NA	NA	NA	ATGAGTAAGCAATTGAGGAATCAGAGTTCAGAATATAAGGAGGGAGATCAATCTGACTTTGAACGA
66	ADOR3B12336	NA	NA	NA	NA	NA	NA	NA	NA	NA	NA	NA	NA	NA	NA	NA	NA	NA	NA	NA	NA	NA	NA	NA	NA	NA	NA	NA	NA	NA	NA	NA	NA	NA	NA	NA	NA	NA	NA	NA	1	NA	NA	NA	NA	NA	NA	ATGGAGAATTTAGCAGCGATTTCTTTGGACGATCGTTGCAAATCTCTCTCATTCTCCCCATTTTTCTTTATTTCCTTTCATTTCCTCTTCCTTCCCCTCCCCCTCCCCCTCCCTTTTTTCGCGAAGCGTTCGAGCTCGCCGCGTTTCGAGAGTTCGCGTCCTTTTTTTCCTTTTTTTTTTTTTTTTTTTCTCTCTCTCTTTTTTTTTTCGTACCAGCTTTTTCCCTCCTGGATGTAA
67	ADOR3B12523	NA	NA	NA	NA	NA	NA	NA	NA	NA	NA	NA	NA	NA	NA	NA	NA	NA	NA	NA	NA	NA	NA	NA	NA	NA	NA	NA	NA	NA	NA	NA	NA	NA	NA	NA	NA	NA	NA	NA	17	NA	NA	NA	NA	NA	NA	ATGCTTGTTGTTTTTGTCTACGTGTCAATTAAAATTATTTATAAGCTCATTATTTCCTTCAAAAAAATTTATTTAATTTTTCAGGAAAAATTCCGTTCAAGCTTTTTAAAATTACTCCGAGAATATTTTTCATTGAAAAAGAATTTCATAAAAATTAATAGACATAATATGAAGAATTATAATCGCATGATGATCTTATTAAAGGATGTTTTGATCACGAAATATAGGCTCGAATTGGAAGAACGATTAGCAAGTAGTGATCGATTCGAGGGAAATATATACGTGGAAATATCTTTTGCGAGATTCGTTCTTCTTTTGAATCGAAGGGAGAGGTGCTCGAAATCTCTCGAAATCCAGAACAGTCGGCGGCGTTTAATTATCGTCTTCGTGCAACTGTCG…
68	ADOR3B13020	NA	NA	NA	NA	NA	NA	NA	NA	NA	NA	NA	NA	NA	NA	NA	NA	NA	NA	NA	NA	NA	NA	NA	NA	NA	NA	NA	NA	NA	NA	NA	NA	NA	NA	NA	NA	NA	NA	NA	2	NA	NA	NA	NA	NA	NA	ATGGCTGCCAGCCACCTCGAAAACGGCGCCAGTTTTGAAATGGGTCTCGTGACCACTTCGCTCTTCCCGCCCTGGCCTTTGCTGATTTTGGCCAGATGTCCTAGTTTTGAAATTGGAGAATACCATTCCCAAGTGAGACAATATTGCTTCTGA
69	ADOR3B13085	NA	NA	NA	NA	NA	NA	NA	NA	NA	NA	NA	NA	NA	NA	NA	NA	NA	NA	NA	NA	NA	NA	NA	NA	NA	NA	NA	NA	NA	NA	NA	NA	NA	NA	NA	NA	NA	NA	NA	4	NA	NA	NA	NA	NA	NA	ATGGCAATAGGATATCGGTCGAGACTTCAATTGAAGGATGCAGAGTCTTTTGTGATCATTCACAGTTGTCATTTGTATCGGTCGAGACTTCAATTGGAGGCTGCAAAATCTTTTGTGATCATTCACAGTTGTCATTTGTATCGGTCGAGACTTCAATTGGAGGCTGCAAAATCTTTTGTGATCATTCACAGTTGTCAT
70	ADOR3B13215	NA	NA	NA	NA	NA	NA	NA	NA	NA	NA	NA	NA	NA	NA	NA	NA	NA	NA	NA	NA	NA	NA	NA	NA	NA	NA	NA	NA	NA	NA	NA	NA	NA	NA	NA	NA	NA	NA	NA	1	NA	NA	NA	NA	NA	NA	ATGGTGACGATGGTGGCATTGAGTAACAATAACAATAACAATAATAATAATAATAATAATAATAATAATAAAAATAAAAATAAAAATAAAAANNNNNNNNNNNNNNNNNNNNNNNNNNNNNNNNNNNNNNNNNNNNNNNNNNNNNNNNNNNNNNNNNNNNNNNNNNNNNNNNNNNNNNNNNNNNNNNNNNNNNNNNNNNNNNNNNNNNNNNNNNNNNNNNNNNNNNNNNNNNNNNNNNNNNNNNNNNNNNNNNNNNNNNNNNNNNNNNNNNNNNNNNNNNNNNNNNNNNNNNNNNNNNNNNNNNNNNNNNNNNNNNNNNNNNNNNNNNNNNNNNNNNNNNNNNNNNNNNNNNNNNNNNNNNNNNNNNNNNNNNNNNNNNNNNNNNNNNNNNNNNNNNNN…
71	ADOR3B13258	NA	NA	NA	NA	NA	NA	NA	NA	NA	NA	NA	NA	NA	NA	NA	NA	NA	NA	NA	NA	NA	NA	NA	NA	NA	NA	NA	NA	NA	NA	NA	NA	NA	NA	NA	NA	NA	NA	NA	1	NA	NA	NA	NA	NA	NA	ATGGATAGTAGCCGCGCTGCTGTATTGGCAGTTGTTCCACCGGCAGTTGGTGTTGTTGTTGTTGTTGTTGTTGTTGTTGCTGCTGTTGTTGCTGCTGCTGCTGTTGTTGTTGTTGTTGTTGACGTTGATGTTGTTGTTGTGACGACGGCTGCGGCTGCNNNNNNNNNNNNNNNNNNNNNNNNNNNNNNNNNNNNNNNNNNNNNNNNNNNNNNNNNNNNNNNNNNNNNNNNNNNNNNNNNNNNNNNNNNNNNNNNNNNNNNNNNNNNNNNNNNNNNNNNNNNNNNNNNNNNNNNNNNNNNNNNNNNNNNNNNNNNNNNNNNNNNNNNNNNNNNNNNNNNNNNNNNNNNNNNNNNNNNNNNNNNNNNNNNNNNNNNNNNNNNNNNNNNNNNNNNNNNNNNN…
72	ADOR3B13362	NA	NA	NA	NA	NA	NA	NA	NA	NA	NA	NA	NA	NA	NA	NA	NA	NA	NA	NA	NA	NA	NA	NA	NA	NA	NA	NA	NA	NA	NA	NA	NA	NA	NA	NA	NA	NA	NA	NA	1	NA	NA	NA	NA	NA	NA	ATGCTCTTTTGCCAGCTGAGACGACAGACGATTGGATCGATCCTGGAGATGGTAGTAGTCCATCCTTCGTGGAGGATGAAT
73	ADOR3B13466	NA	NA	NA	NA	NA	NA	NA	NA	NA	NA	NA	NA	NA	NA	NA	NA	NA	NA	NA	NA	NA	NA	NA	NA	NA	NA	NA	NA	NA	NA	NA	NA	NA	NA	NA	NA	NA	NA	NA	2	NA	NA	NA	NA	NA	NA	ATGGGTGGAGACGAAGACGACGACGGAGACGACGACGACGACGACGACGACGATGACGACGATGATGACGATGACGACGACGACGACGATGATGACGACAACGACGACGACGACCATGACGGCGATGATGATGATGATGATGATAAAAACCGATACACGCTGAGATGA
74	ADOR3B13506	NA	NA	NA	NA	NA	NA	NA	NA	NA	NA	NA	NA	NA	NA	NA	NA	NA	NA	NA	NA	NA	NA	NA	NA	NA	NA	NA	NA	NA	NA	NA	NA	NA	NA	NA	NA	NA	NA	NA	1	NA	NA	NA	NA	NA	NA	ATGCGGACATGTGCGGGAAATTGCACAGGGATCGATCCCAGGACCCTCGGGGGAAGCGCGGCCTCTCTCTCTCCCTCTCTTTCTCTCTCTCTCTCTCCCTCTCTCTCTCTCTCTCTCTCTTCCCCTTTTTCTTCTTGTCTTACTCTCTCTTGCTCCCTTCTTCTCTCTCTCTCTCTCTCTCTCTCTCTCTCTTCCATCTCTCTCACTCTCATTTCAATCCCTCCTCCTCGTCCCGCTCTCCACTGCTGCCCTCGTAACTGTCTCTCGCCTTCTCACAACTCGTCTCTCGCTCTCTTTCTCTCTCTCTCTCTCTCTCTCTTTCTCCCCTCCCTCTCTCTCTCTCGTTCATGA
75	ADOR3B13753	NA	NA	NA	NA	NA	NA	NA	NA	NA	NA	NA	NA	NA	NA	NA	NA	NA	NA	NA	NA	NA	NA	NA	NA	NA	NA	NA	NA	NA	NA	NA	NA	NA	NA	NA	NA	NA	NA	NA	1	NA	NA	NA	NA	NA	NA	ATGATTTCACTTTTAAATGGCCTGCCATTAATACTACGATGTCTTTCGAACATCTCTATCCCTATTAACAAATGGAAATTAACAATAATATTCGTCGATGCTGTGGAAGGAAATATTTTCTGCGTGCGTGTGAGCGTGACACGGTCGACCAAATCGTCGATACGAGTGGTATCAAGCGAGGAGGAGGAGGAAAAAAAAAAAAAAAAAAAATGA
76	ADOR3B13781	NA	NA	NA	NA	NA	NA	NA	NA	NA	NA	NA	NA	NA	NA	NA	NA	NA	NA	NA	NA	NA	NA	NA	NA	NA	NA	NA	NA	NA	NA	NA	NA	NA	NA	NA	NA	NA	NA	NA	1	NA	NA	NA	NA	NA	NA	ATGCCGTTCAACCCGAACAGCACTTCCAACTCCCTTAATCCTTCCACGTCTTCCGTGCTCGTGCTCGTGCTCGTGCCACCGACCNNNNNNNNNNNNNNNNNNNNNNNNNNNNNNNNNNNNNNNNNNNNNNNNNNNNNNNNNNNNNNNNNNNNNNNNNNNNNNNNNNNNNNNNNNNNNNNNNNNNNNNNNNNNNNNNNNNNNNNNNNNNNNNNNNNNNNNNNNNNNNNNNNNNNNNNNNNNNNNNNNNNNNNNNNNNNNNNNNNNNNNNNNNNNNNNNNNNNNNNNNNNNNNNNNNNNNNNNNNNNNNNNNNNNNNNNNNNNNNNNNNNNNNNNNNNNNNNNNNNNNNNNNNNNNNNNNNNNNNNNNNNNNNNNNNNNNNNNNNNNNNNNNNNNNNNNNN…
77	ADOR3B13807	NA	NA	NA	NA	NA	NA	NA	NA	NA	NA	NA	NA	NA	NA	NA	NA	NA	NA	NA	NA	NA	NA	NA	NA	NA	NA	NA	NA	NA	NA	NA	NA	NA	NA	NA	NA	NA	NA	NA	1	NA	NA	NA	NA	NA	NA	ATGGCGCTTATTAACGGCTGGTGTTTAACCACGCTCCGCGATATCCGTCCGTTCTCGTCTCTTCATCTTCGCTCTTTCGTACTCAAGGTATATCCTCTTTTCTCCCGTCGAAAATTTATTATCATCTTCTTCGAATTCTTCGAGTTCTTCGAATTTCGCAAAAGGAAAGAGAATCCTTTCTATTTTATTAATTTTTCCCTTCGATCCGTTGCGAGGCGTCATCGAGGCGAAAACGAGCAGCAGCAGAAGAGTAGAAGAGTGTAA
78	ADOR3B13854	NA	NA	NA	NA	NA	NA	NA	NA	NA	NA	NA	NA	NA	NA	NA	NA	NA	NA	NA	NA	NA	NA	NA	NA	NA	NA	NA	NA	NA	NA	NA	NA	NA	NA	NA	NA	NA	NA	NA	2	NA	NA	NA	NA	NA	NA	ATGGCGGCTAGCTGCTTGAAGATGAAATATCTCTCAGCTATAGCAGTATATCATTTGAACTATCTGATATTAATATCTTCTTATATATTCAATAAATATTTTTAA
79	ADOR3B14158	NA	NA	NA	NA	NA	NA	NA	NA	NA	NA	NA	NA	NA	NA	NA	NA	NA	NA	NA	NA	NA	NA	NA	NA	NA	NA	NA	NA	NA	NA	NA	NA	NA	NA	NA	NA	NA	NA	NA	2	NA	NA	NA	NA	NA	NA	ATGCCCGACGAAGCGCGAATTCTTCGCGCGGGCAAACTCGGTCTCGCCTCTTCGTTAAAATCCAGCGAGGATAGTGTAAGACTGGGTCGAGCTCCTCAGGTTTCTCGACCCGAGGGGTTAAAGTCTCGACGAAACCGATCGTCATCTTCATTTTCTTCGCCGGGGAAGAGAAGTTCTAGCTCGGTCTACCGTTTCGTTTCGGGCATGGATTTCGCAGTTGCTAATTTCGAGGATACAGATGTGGAACAAATGTGGAGATAA
80	ADOR3B14168	NA	NA	NA	NA	NA	NA	NA	NA	NA	NA	NA	NA	NA	NA	NA	NA	NA	NA	NA	NA	NA	NA	NA	NA	NA	NA	NA	NA	NA	NA	NA	NA	NA	NA	NA	NA	NA	NA	NA	1	NA	NA	NA	NA	NA	NA	ATGATGCTTGCATCGCCAGACAAAAGCTGCGACAACCGNNNNNNNNNNNNNNNNNNNNNNNNNNNNNNNNNNNNNNNNNNNNNNNNNNNNNNNNNNNNNNNNNNNNNNNNNNNNNNNNNNNNNNNNNNNNNNNNNNNNNNNNNNNNNNNNNNNNNNNNNNNNNNNNNNNNNNNNNNNNNNNNNNNNNNNNNNNNNNNNNNNNNNNNNNNNNNNNNNNNNNNNNNNNNNNNNNNNNNNNNNNNNNNNNNNNNNNNNNNNNNNNNNNNNNNNNNNNNNNNNNNNNNNNNNNNNNNNNNNNNNNNNNNNNNNNNNNNNNNNNNNNNNNNNNNNNNNNNNNNNNNNNNNNNNNNNNNNNNNNNNNNNNNNNNNNNNNNNNNNNNNNNNNNNNNNNNNNNNNNN…
81	ADOR3B14203	NA	NA	NA	NA	NA	NA	NA	NA	NA	NA	NA	NA	NA	NA	NA	NA	NA	NA	NA	NA	NA	NA	NA	NA	NA	NA	NA	NA	NA	NA	NA	NA	NA	NA	NA	NA	NA	NA	NA	1	NA	NA	NA	NA	NA	NA	ATGACCACGGGCAATCGCAACCCCGATCGATTTAGAACGCTCGGTCTTATCGGGCTTGCAGGATCTACGATGGATCTACGATCCTTGGAATTCCTGGATCTTTGA
82	ADOR3B14256	NA	NA	NA	NA	NA	NA	NA	NA	NA	NA	NA	NA	NA	NA	NA	NA	NA	NA	NA	NA	NA	NA	NA	NA	NA	NA	NA	NA	NA	NA	NA	NA	NA	NA	NA	NA	NA	NA	NA	1	NA	NA	NA	NA	NA	NA	ATGTCTTTGGTTTGTGGCGCCATCTCTTGGATAATGCTAAATAAGAAGTTCAGCGTTTTTCGAAGAGATGGCGCCACTACTTACAATCTTCACAAAATGTCTTTGGTTTGTAGCGCCATCTCTTGGATAATGCTAAATAAGAAGTTCAGCGTTTTTCGAAGAGATGGCGCCACTACTTACAATCTTCACAAAATGTCTTTGGTATGTGGCGCCATCTCTTGGAAAAGCTTAACTACGAGGTTCAGCATTTTTCGAAGAGATGGCGCCACTATTCACTGTCTTTGGTTTGTAGCGCCATCTCTTGGAAAAGGTTAA
83	ADOR3B14337	NA	NA	NA	NA	NA	NA	NA	NA	NA	NA	NA	NA	NA	NA	NA	NA	NA	NA	NA	NA	NA	NA	NA	NA	NA	NA	NA	NA	NA	NA	NA	NA	NA	NA	NA	NA	NA	NA	NA	1	NA	NA	NA	NA	NA	NA	ATGTTATTGGGCGGTTGTTTACTTCGGGTTAATCATCACCTCCGGCGCCAAAGATTCGTCGGGGCCATGGTGGGAACCGGGAACCGCGAACAGAGGCGGAGACAGGGAAGAGACGGAAGGTTTGGGCGGTTG
84	ADOR3B14397	NA	NA	NA	NA	NA	NA	NA	NA	NA	NA	NA	NA	NA	NA	NA	NA	NA	NA	NA	NA	NA	NA	NA	NA	NA	NA	NA	NA	NA	NA	NA	NA	NA	NA	NA	NA	NA	NA	NA	1	NA	NA	NA	NA	NA	NA	ATGCCAAAAAATGACATCGAGAAACCAAAAGAACAAACC
85	ADOR3B14407	NA	NA	NA	NA	NA	NA	NA	NA	NA	NA	NA	NA	NA	NA	NA	NA	NA	NA	NA	NA	NA	NA	NA	NA	NA	NA	NA	NA	NA	NA	NA	NA	NA	NA	NA	NA	NA	NA	NA	1	NA	NA	NA	NA	NA	NA	ATGGTGCCCGATACGCTGCGACTGCCTTCGTCGGCCTTCGATGGAAACGAGAAGAAGGGTGGAAACGAACGGTCGAGGAGCCGTTTCGGGGAATTCTGGCGGGCTGCTCTGTTGGTCGATGATACCAGTATGCCGTCCTTCGAGAAGACGGATCCTGGTGATCGCAGAGACCGCCTCGTCTTGGAGGCGCGTCGCCCAAACGACGCGACCTTCGATTATGGCGGAGCATCTATAGCATCCGTGACAAAGAGCTAA
86	ADOR3B14484	NA	NA	NA	NA	NA	NA	NA	NA	NA	NA	NA	NA	NA	NA	NA	NA	NA	NA	NA	NA	NA	NA	NA	NA	NA	NA	NA	NA	NA	NA	NA	NA	NA	NA	NA	NA	NA	NA	NA	1	NA	NA	NA	NA	NA	NA	ATGATTTGGAGAACGATCGAGAAACAGAGCAGGAATGCTCGACGCACTCTGTTAATCCACCACCAGTAG
87	ADOR3B14841	NA	NA	NA	NA	NA	NA	NA	NA	NA	NA	NA	NA	NA	NA	NA	NA	NA	NA	NA	NA	NA	NA	NA	NA	NA	NA	NA	NA	NA	NA	NA	NA	NA	NA	NA	NA	NA	NA	NA	1	NA	NA	NA	NA	NA	NA	ATGTCTCCACGACGCGTCGCGTCGCACGCTTCATGCTTCTGCGCTATCCGATGTCGAGCGTCGNNNNNNNNNNNNNNNNNNNNNNNNNNNNNNNNNNNNNNNNNNNNNNNNNNNNNNNNNNNNNNNNNNNNNNNNNNNNNNNNNNNNNNNNNNNNNNNNNNNNNNNNNNNNNNNNNNNNNNNNNNNNNNNNNNNNNNNNNNNNNNNNNNNNNNNNNNNNNNNNNNNNNNNNNNNNNNNNNNNNNNNNNNNNNNNNNNNNNNNNNNNNNNNNNNNNNNNNNNNNNNNNNNNNNNNNNNNNNNNNNNNNNNNNNNNNNNNNNNNNNNNNNNNNNTGTTTTCTTTTTTTCGTTTCTATGGATAAACTTTGAATAA
88	ADOR3B14954	NA	NA	NA	NA	NA	NA	NA	NA	NA	NA	NA	NA	NA	NA	NA	NA	NA	NA	NA	NA	NA	NA	NA	NA	NA	NA	NA	NA	NA	NA	NA	NA	NA	NA	NA	NA	NA	NA	NA	1	NA	NA	NA	NA	NA	NA	ATGCGGGGAGGACACGCGTGGAGGAAGGGAAGGGGAGGGAAAAGTCGAAGGGAGAAAGAAGTCACGAGTCGAGAACGACAGAGAGAGAGCGATAGAGAGAGAAAGAGCGAGAGAGAGAGCGATAGAGAGAGAGAGAGAGAGAGAGAGAGAGAGAGAGAGAGAGAGAGANNNNNNNNNNNNNNNNNNNNNNNNNNNNNNNNNNNNNNNNNNNNNNNNNNNNNNNNNNNNNNNNNNNNNNNNNNNNNNNNNNNNNNNNNNNNNNNNNNNNNNNNNNNNNNNNNNNNNNNNNNNNNNNNNNNNNNNNNNNNNNNNNNNNNNNNNNNNNNNNNNNNNNNNNNNNNNNNNNNNNNNNNNNNNNNNNNNNNNNNNNNNNNNNNNNNNNNNNNNNNNNNNNNNNNN…
89	ADOR3B14955	NA	NA	NA	NA	NA	NA	NA	NA	NA	NA	NA	NA	NA	NA	NA	NA	NA	NA	NA	NA	NA	NA	NA	NA	NA	NA	NA	NA	NA	NA	NA	NA	NA	NA	NA	NA	NA	NA	NA	1	NA	NA	NA	NA	NA	NA	ATGTCCCGAGTTCGACGCCCACGCCAACCACCCACCCCCTCTGCCAAACCAAACGTACTTCTTCCCCTTTTTTTTCCTCCCTCCCCCCAATCCTCCTCCTCCTCCTCGTTGTCTCCTGCCTCCCTTTCCACTTCCCTGTTCCACCTCTACCACCACCACCACCACCATCGCGATACGATCACGCTGCTCCTCTCTCCTCTCGTTCATCACGCTGCACATCCACACACGTTTGCATCGACCATGGCCAACGCACGCACACGTGGATGGACGTTTCGCGCACAACCAACGCGCCTTTCTCTTCCTTTTCTCTTCCTCCGCTTCCTTCGGTGGAGGGTGGCGAAGGGGTTGTTCTCGCCGGAAGGAAGGGGGACCGTAGGCGTAAAAAGAGTTGGGGAGGGG…
90	ADOR3B14957	NA	NA	NA	NA	NA	NA	NA	NA	NA	NA	NA	NA	NA	NA	NA	NA	NA	NA	NA	NA	NA	NA	NA	NA	NA	NA	NA	NA	NA	NA	NA	NA	NA	NA	NA	NA	NA	NA	NA	2	NA	NA	NA	NA	NA	NA	ATGAAGGGGGTGTTGGAGCGTGGATGGGGTTTTGAAAGACATCGAACAGATTATGTACAGGATGATCATGCACAATGGAGAGAAGAATTTGGACGACCTTTGAATATATTTAGAAACAAAATTCTAGGTGGTTGGGATCTGAGACGACATTTTTCCAGTCTCGGAGAAAAATCAGAGAAAAATTATTGCAAACACTTCAGCGGACTTTGTGGGAGGCGTAGCCTCTCAGTCTCGTTCCAGGAATTCATTCCTTAG
91	ADOR3B14976	NA	NA	NA	NA	NA	NA	NA	NA	NA	NA	NA	NA	NA	NA	NA	NA	NA	NA	NA	NA	NA	NA	NA	NA	NA	NA	NA	NA	NA	NA	NA	NA	NA	NA	NA	NA	NA	NA	NA	1	NA	NA	NA	NA	NA	NA	GAAATGCCCTGTACGGCTCTACGATGCATCATCATCCGAGCGGCCAGGTGTCCAGTTGTGGGGCACAATGCGGTGCGTCATCGTCGTCTTCGAAGCCACCGAATCCGTTCCCGAACACCGGTCGGCCTTATAACGTTACAGCGCCTT
92	ADOR3B15055	NA	NA	NA	NA	NA	NA	NA	NA	NA	NA	NA	NA	NA	NA	NA	NA	NA	NA	NA	NA	NA	NA	NA	NA	NA	NA	NA	NA	NA	NA	NA	NA	NA	NA	NA	NA	NA	NA	NA	1	NA	NA	NA	NA	NA	NA	ATGCCGGATGAAGGCGAGCAAGGAGGAATCGGGGAAACGTTTACCGGCCTTGCCAAGACTTACGCTTACGCGCCCACGTTTTTTCCCCCCTCCCTCCCTCCCTTTTCTCCTTTTTCTTTCTTTCAACCCAGTTCAAAGTCGTCGTCGGCTACTTTTCTTTTCTTTTCTTTTCTTTCTTTTTTTTTGCGCGCGCGATCGGCCATAAAAATTTTCTTCTTCCCGCGGGTGGAAAGTATGAGAGAGAGAGAGAGAGAGAGAGAGGNNNNNNNNNNNNNNNNNNNNNNNNNNNNNNNNNNNNNNNNNNNNNNNNNNNNNNNNNNNNNNNNNNNNNNNNNNNNNNNNNNNNNNNNNNNNNNNNNNNNNNNNNNNNNNNNNNNNNNNNNNNNNNNNNNNNNNNNN…
93	ADOR3B15260	NA	NA	NA	NA	NA	NA	NA	NA	NA	NA	NA	NA	NA	NA	NA	NA	NA	NA	NA	NA	NA	NA	NA	NA	NA	NA	NA	NA	NA	NA	NA	NA	NA	NA	NA	NA	NA	NA	NA	1	NA	NA	NA	NA	NA	NA	ATGTTTGCAATTCAAATAAGGCAATGCTGGTTGAGACTGGCATGGCTGTCTCAATATCACATTGATAAATCTCCAATCGAATTGCTTCTAACAAATAATAATAATAAAGCCAAGAGTCCTTCTCCAAATTCTCAAAAAACTGTCCTCGCAGCATCATCCTGTACCATCTTACCATATTCAAATTGTTCAGAATTGTTTGAAAATTGA
94	ADOR3B15263	NA	NA	NA	NA	NA	NA	NA	NA	NA	NA	NA	NA	NA	NA	NA	NA	NA	NA	NA	NA	NA	NA	NA	NA	NA	NA	NA	NA	NA	NA	NA	NA	NA	NA	NA	NA	NA	NA	NA	1	NA	NA	NA	NA	NA	NA	ATGCTAAATTTCCGCCACCACACGCCACCACCTCGTCCGCATCAACCCCCTTTTCCCACGGAACCGTGCCTCTCCCCCTCCTCCCCNNNNNNNNNNNNNNNNNNNNNNNNNNNNNNNNNNNNNNNNNNNNNNNNNNNNNNNNNNNNNNNNNNNNNNNNNNNNNNNNNNNNNNNNNNNNNNNNNNNNNNNNNNNNNNNNNNNNNNNNNNNNNNNNNNNNNNNNNNNNNNNNNNNNNNNNNNNNNNNNNNNNNNNNNNNNNNNNNNNNNNNNNNNNNNNNNNNNNNNNNNNNNNNNNNNNNNNNNNNNNNNNNNNNNNNNNNNNNNNNNNNNNNNNNNNNNNNNNNNNNNNNNNNNNNNNNNNNNNNNNNNNNNNNNNNNNNNNNNNNNNNNNNNNNNNNN…
95	ADOR3B15265	NA	NA	NA	NA	NA	NA	NA	NA	NA	NA	NA	NA	NA	NA	NA	NA	NA	NA	NA	NA	NA	NA	NA	NA	NA	NA	NA	NA	NA	NA	NA	NA	NA	NA	NA	NA	NA	NA	NA	1	NA	NA	NA	NA	NA	NA	ATGAGTTACGAAGAAGCTACGAAACCGATGATATCTAAAATGTTCTATTTTCATCCTCTACTCACCTCGAGGCGAAATGGCGGTGCTGTAATGCGAAAA
96	ADOR3B15328	NA	NA	NA	NA	NA	NA	NA	NA	NA	NA	NA	NA	NA	NA	NA	NA	NA	NA	NA	NA	NA	NA	NA	NA	NA	NA	NA	NA	NA	NA	NA	NA	NA	NA	NA	NA	NA	NA	NA	1	NA	NA	NA	NA	NA	NA	ATGGTAGTAGTAGGGNNNNNNNNNNNNNNNNNNNNNNNNNNNNNNNNNNNNNNNNNNNNNNNNNNNNNNNNNNNNNNNNNNNNNNNNNNNNNNNNNNNNNNNNNNNNNNNNNNNNNNNNNNNNNNNNNNNNNNNNNNNNNNNNNNNNNNNNNNNNNNNNNNNNNNNNNNNNNNNNNNNNNNNNNNNNNNNNNNNNNNNNNNNNNNNNNNNNNNNNNNNNNNNNNNNNNNNNNNNNNNNNNNNNNNNNNNNNNNNNNNNNNNNNNNNNNNNNNNNNNNNNNNNNNNNNNNNNNNNNNNNNNNNNNNNNNNNNNNNNNNNNNNNNNNNNNNNNNNNNNNNNNNNNNNNNNNNNNNNNNNNNNNNNNNNNNNNNNNNNNNNNNNNNNNNNNNNNNNNNNNNN…
97	ADOR3B15439	NA	NA	NA	NA	NA	NA	NA	NA	NA	NA	NA	NA	NA	NA	NA	NA	NA	NA	NA	NA	NA	NA	NA	NA	NA	NA	NA	NA	NA	NA	NA	NA	NA	NA	NA	NA	NA	NA	NA	1	NA	NA	NA	NA	NA	NA	ATGAAACGCCGCCATCGTCGTCGTCGTCGTCCTCGTCATCGTCGATCNNNNNNNNNNNNNNNNNNNNNNNNNNNNNNNNNNNNNNNNNNNNNNNNNNNNNNNNNNNNNNNNNNNNNNNNNNNNNNNNNNNNNNNNNNNNNNNNNNNNNNNNNNNNNNNNNNNNNNNNNNNNNNNNNNNNNNNNNNNNNNNNNNNNNNNNNNNNNNNNNNNNNNNNNNNNNNNNNNNNNNNNNNNNNNNNNNNNNNNNNNNNNNNNNNNNNNNNNNNNNNNNNNNNNNNNNNNNNNNNNNNNNNNNNNNNNNNNNNNNNNNNNNNNNNNNNNNNNNNNNNNNNNNNNNNNNNNNNNNNNNNNNNNNNNNNNNNNNNNNNNNNNNNNNNNNNNNNNNNNNNNNNNNNNNNN…
98	ADOR3B15444	NA	NA	NA	NA	NA	NA	NA	NA	NA	NA	NA	NA	NA	NA	NA	NA	NA	NA	NA	NA	NA	NA	NA	NA	NA	NA	NA	NA	NA	NA	NA	NA	NA	NA	NA	NA	NA	NA	NA	1	NA	NA	NA	NA	NA	NA	ATGTCCATCACGCTCGTTCCACAACATGACTTGACTAACACC
99	ADOR3B15493	NA	NA	NA	NA	NA	NA	NA	NA	NA	NA	NA	NA	NA	NA	NA	NA	NA	NA	NA	NA	NA	NA	NA	NA	NA	NA	NA	NA	NA	NA	NA	NA	NA	NA	NA	NA	NA	NA	NA	1	NA	NA	NA	NA	NA	NA	ATGGCCATCCAAAGTTTTGGATTGATCGAGTGTGTCTTGGGGATATCT
100	ADOR3B15529	NA	NA	NA	NA	NA	NA	NA	NA	NA	NA	NA	NA	NA	NA	NA	NA	NA	NA	NA	NA	NA	NA	NA	NA	NA	NA	NA	NA	NA	NA	NA	NA	NA	NA	NA	NA	NA	NA	NA	2	NA	NA	NA	NA	NA	NA	ATGGCTAATTGCGAGAGGGAATCCAGACCAGAAGGGATATCTTTGAGGCGAGGTTCAACGATCTATGGTAGTAATGGCCTTGAAACTGGATTGAAATGGCCTTGA
101	ADOR3B15557	NA	NA	NA	NA	NA	NA	NA	NA	NA	NA	NA	NA	NA	NA	NA	NA	NA	NA	NA	NA	NA	NA	NA	NA	NA	NA	NA	NA	NA	NA	NA	NA	NA	NA	NA	NA	NA	NA	NA	23	NA	NA	NA	NA	NA	NA	ATGTTACACCAAAAAAAAAAAAACTTTGATAGAGAGAGAGAAAAAAAAGAGACAANNNNNNNNNNNNNNNNNNNNNNNNNNNNNNNNNNNNNNNNNNNNNNNNNNNNNNNNNNNNNNNNNNNNNNNNNNNNNNNNNNNNNNNNNNNNNNNNNNNNNNNNNNNNNNNNNNNNNNNNNNNNNNNNNNNNTAAAAAGATAA
102	ADOR3B15559	NA	NA	NA	NA	NA	NA	NA	NA	NA	NA	NA	NA	NA	NA	NA	NA	NA	NA	NA	NA	NA	NA	NA	NA	NA	NA	NA	NA	NA	NA	NA	NA	NA	NA	NA	NA	NA	NA	NA	7	NA	NA	NA	NA	NA	NA	ATGGATTGGAAATTTTATGGTTTTAATCAAAAGAACATCCATGCAATTTTTCGTTCTAAGTTATTGAGATCTTTGAGATATAAAATTGATTTTGAAAAATGGATATATTCAATTATTTTTCTTCCAAATTAA
103	ADOR3B15675	NA	NA	NA	NA	NA	NA	NA	NA	NA	NA	NA	NA	NA	NA	NA	NA	NA	NA	NA	NA	NA	NA	NA	NA	NA	NA	NA	NA	NA	NA	NA	NA	NA	NA	NA	NA	NA	NA	NA	1	NA	NA	NA	NA	NA	NA	ATGCAGTCTGGCCGTGTTTCGTGTCGGATGCCGCGGCAGCAGNNNNNNNNNNNNNNNNNNNNNNNNNNNNNNNNNNNNNNNNNNNNNNNNNNNNNNNNNNNNNNNNNNNNNNNNNNNNNNNNNNNNNNNNNNNNNNNNNNNNNNNNNNNNNNNNNNNNNNNNNNNNNNNNNNNNNNNNNNNNNNNNNNNNNNNNNNNNNNNNNNNNNNNNNNNNNNNNNNNNNNNNNNNNNNNNNNNNNNNNNNNNNNNNNNNNNNNNNNNNNNNNNNNNNNNNNNNNNNNNNNNNNNNNNNNNNNNNNNNNNNNNNNNNNNNNNNNNNNNNNNNNNNNNNNNNNNNNNNNNNNNNNNNNNNNNNNNNNNNNNNNNNNNNNNNNNNNNNNNNNNNNNNNNNNNNNNNNN…
104	ADOR3B15718	NA	NA	NA	NA	NA	NA	NA	NA	NA	NA	NA	NA	NA	NA	NA	NA	NA	NA	NA	NA	NA	NA	NA	NA	NA	NA	NA	NA	NA	NA	NA	NA	NA	NA	NA	NA	NA	NA	NA	1	NA	NA	NA	NA	NA	NA	ATGTTGGAATTGGCTTATTTTAAACCTGGCTTAACTCAGGAATTAAAATCTTTTCAACAAATTAAAATATCATCA
105	ADOR3B15731	NA	NA	NA	NA	NA	NA	NA	NA	NA	NA	NA	NA	NA	NA	NA	NA	NA	NA	NA	NA	NA	NA	NA	NA	NA	NA	NA	NA	NA	NA	NA	NA	NA	NA	NA	NA	NA	NA	NA	6	GO:0008150	biological_process	GO:0003674	molecular_function	GO:0005575	cellular_component	ATGAGTTATTTAATAAGAATAATTAATCCAGAATTAATCAATCGTTACCAATTGCCAAAAAATTTCCCTGATTTCTTCTCAACAACCGATAAAATTCACCCCGTGCGTCGAATCCACGGGACACCCGTGTCTAGAAATGGTGTACAGCTGTTGAGGAACGTGAATTGGCATGCAGGCATTGATTCGAGTGCAGGGTTTAAGTTCATCACGAAACTGAAGTGTCGAATTTTCTTGTCTAGAAATGGTGTACAGCTGTTGAGGAACGTGAATTGGCATGCAGGCATTGATTCGAGTGCAGGGTTTAAGTTCATCACGAAACTGAAGTGTCGAATTTTCTTGTCTAGAAATGGTGTACAGCTGTTGAGGAACGTGAATTGGCATGCAGGCATTGATTCGAGT…
106	ADOR3B15733	NA	NA	NA	NA	NA	NA	NA	NA	NA	NA	NA	NA	NA	NA	NA	NA	NA	NA	NA	NA	NA	NA	NA	NA	NA	NA	NA	NA	NA	NA	NA	NA	NA	NA	NA	NA	NA	NA	NA	1	NA	NA	NA	NA	NA	NA	AATTGTTTGAGTGTTGAGTATTTCAATAGAGATTTGGAA
107	ADOR3B15800	NA	NA	NA	NA	NA	NA	NA	NA	NA	NA	NA	NA	NA	NA	NA	NA	NA	NA	NA	NA	NA	NA	NA	NA	NA	NA	NA	NA	NA	NA	NA	NA	NA	NA	NA	NA	NA	NA	NA	6	NA	NA	NA	NA	NA	NA	TCCGCGTATTATATATATGTATTATATATATTTCGTATGTCGTTTCATTGGAACATTTTTTTCAAGTTTACTTTTTATTTCTGTTCACCAAAAAGTGTGTCAAAGAATATTTACAAAGAACAACTACTTTGTTCACATTATATACAATTTTTTCATTTTCATCTAGGCCTCCAAATATTTACTAATATATTTCAGTTTTCACTAAAATTTCAAAACAATTAA
108	ADOR3B15820	NA	NA	NA	NA	NA	NA	NA	NA	NA	NA	NA	NA	NA	NA	NA	NA	NA	NA	NA	NA	NA	NA	NA	NA	NA	NA	NA	NA	NA	NA	NA	NA	NA	NA	NA	NA	NA	NA	NA	1	NA	NA	NA	NA	NA	NA	ATCACCCCT
109	ADOR3B15837	NA	NA	NA	NA	NA	NA	NA	NA	NA	NA	NA	NA	NA	NA	NA	NA	NA	NA	NA	NA	NA	NA	NA	NA	NA	NA	NA	NA	NA	NA	NA	NA	NA	NA	NA	NA	NA	NA	NA	3	NA	NA	NA	NA	NA	NA	ATGAATGATTGTGTTTATTTCTCCACTTTTCCAAATCCTCATTTGAAGGATCTTATACTCGACGAGAGACCCGATTCTAGTCCTCAACTGTCCAGAAATAGATTGAAATGTGGAAGGAATTTTGCTGCTTCATTTCTTGCTTATAATGATACTTGTGTACCAATATTGTGA
110	ADOR3B15864	NA	NA	NA	NA	NA	NA	NA	NA	NA	NA	NA	NA	NA	NA	NA	NA	NA	NA	NA	NA	NA	NA	NA	NA	NA	NA	NA	NA	NA	NA	NA	NA	NA	NA	NA	NA	NA	NA	NA	1	NA	NA	NA	NA	NA	NA	ATGCGTCGCCGCGAAAGTGGAATAAGCCAAGACACACGGGGGTGGTGGTGGTGGTGGTGGTGGTGGTGCGGCANNNNNNNNNNNNNNNNNNNNNNNNNNNNNNNNNNNNNNNNNNNNNNNNNNNNNNNNNNNNNNNNNNNNNNNNNNNNNNNNNNNNNNNNNNNNNNNNNNNNNNNNNNNNNNNNNNNNNNNNNNNNNNNNNNNNNNNNNNNNNNNNNNNNNNNNNNNNNNNNNNNNNNNNNNNNNNNNNNNNNNNNNNNNNNNNNNNNNNNNNNNNNNNNNNNNNNNNNNNNNNNNNNNNNNNNNNNNNNNNNNNNNNNNNNNNNNNNNNNNNNNNNNNNNNNNNNNNNNNNNNNNNNNNNNNNNNNNNNNNNNNNNNNNNNNNNNNNNNNNNNNNNN…
111	ADOR3B16004	NA	NA	NA	NA	NA	NA	NA	NA	NA	NA	NA	NA	NA	NA	NA	NA	NA	NA	NA	NA	NA	NA	NA	NA	NA	NA	NA	NA	NA	NA	NA	NA	NA	NA	NA	NA	NA	NA	NA	1	NA	NA	NA	NA	NA	NA	GTAAGTTTCTATGAAATGAAATGGCCACAGGCTTATGGTATTTTGGAGCTAAATCTTGTATTACAACTAAATGATGACTGCAGCCTTTGGGGAATCAACGTCTATTGGACTGTTCTCGATCTTTGA
112	ADOR3B16027	NA	NA	NA	NA	NA	NA	NA	NA	NA	NA	NA	NA	NA	NA	NA	NA	NA	NA	NA	NA	NA	NA	NA	NA	NA	NA	NA	NA	NA	NA	NA	NA	NA	NA	NA	NA	NA	NA	NA	1	NA	NA	NA	NA	NA	NA	ATGATGACATCGATGATGGCGGCGATGGAGGACACGAAAGCAACGGAGCGTCGAAACCACAGGCGATTT
113	ADOR3B16074	NA	NA	NA	NA	NA	NA	NA	NA	NA	NA	NA	NA	NA	NA	NA	NA	NA	NA	NA	NA	NA	NA	NA	NA	NA	NA	NA	NA	NA	NA	NA	NA	NA	NA	NA	NA	NA	NA	NA	1	NA	NA	NA	NA	NA	NA	CTCGGTAGAACGATCTAG
114	ADOR3B16126	NA	NA	NA	NA	NA	NA	NA	NA	NA	NA	NA	NA	NA	NA	NA	NA	NA	NA	NA	NA	NA	NA	NA	NA	NA	NA	NA	NA	NA	NA	NA	NA	NA	NA	NA	NA	NA	NA	NA	14	NA	NA	NA	NA	NA	NA	ATGCGCGACGTGGCTGCCAAATGCGTTAATCTAATTTTCTGGGCATCGATTAACGCCACACGACCAACATGGCCGATCCACCGCTGGCCGCAGCGGCGGATAAACGATCACGCTGAATGGTTGGAGGGAGGAATGGGTGGGGAGAAAAAAAAAAAAAAAAANNNNNNNNNNNNNNNNNNNNNNNNNNNNNNNNNNNNNNNNNNNNNNNNNNNNNNNNNNNNNNNNNNNNNNNNNNNNNNNNNNNNNNNNNNNNNNNNNNNNNNNNNNNNNNNNNNNNNNNNNNNNNNNNNNNNNNNNNNNNNNNNNATCCCGCGCACAACGTTGAACAGAGGAAACTGGCTCGAAACTGTGTGCTCGCGCGTCCCCCATTTTGCGATCGGTTTTCTTTGGGGTGGAAAA…
115	ADOR3B16140	NA	NA	NA	NA	NA	NA	NA	NA	NA	NA	NA	NA	NA	NA	NA	NA	NA	NA	NA	NA	NA	NA	NA	NA	NA	NA	NA	NA	NA	NA	NA	NA	NA	NA	NA	NA	NA	NA	NA	2	NA	NA	NA	NA	NA	NA	CAAATCGATCTTGGCCCCAAAACTCTACGCAAACTCCCTGCGAAAACGATCCTAACCACACAAAAGACCACCTTTAAATCATCGGTTCTACAAAACAATGATGATGATAATGATGATGATGATCCATTCCATCACCACAGACCGCAAAATCTACTCATTAGGATCATTTCATCGGCTGCAGAAACTAGAGGACTACGAGGAATGAAGATTCCACAAAATTTCCTAGAACGATCCTTAAAGACCAAAAATGCAAAAACGTGGAACCAAAGGAAGTCGAAGATTTCCTCGCTTCTCGTTAAGAATTGTCCCGGAACAAGGGACGGTAGAACTGCATCGTCCTCGTCGTCTATTCTGTACACGGAGTTCTTATTGTTCGGCCAAGAGGCGAGAGAGGAATCG…
116	ADOR3B16141	NA	NA	NA	NA	NA	NA	NA	NA	NA	NA	NA	NA	NA	NA	NA	NA	NA	NA	NA	NA	NA	NA	NA	NA	NA	NA	NA	NA	NA	NA	NA	NA	NA	NA	NA	NA	NA	NA	NA	1	NA	NA	NA	NA	NA	NA	ATGCGACGAAAAACAATCGAGTCGAAGACGATGGAAGATATTCCATCTCTTATATATATATATCCCTTAAGATCCAACAGATTGACAATTTTTTCGTTATTCGATTTCGCCAAAAAAAAAAAAATTTTTCCTTTCTTTCCCCAAACGATTGATCGAAAAAAGCAGCAGCAGCAGCACTCGAGCAAATTCAACGATCAAGGACAATACATACCCTTCCATTTCGAATTCAAAGACACGTTTCCATCCTTGATCCATCCTGTCCGCACGATCTATCCCGCAAGCATCGCGCGGACAGATACCAGTTTCATCCTCGCTCGCGTGCTCGCGTTCACGGCGGGAACGAGCGTTGACGACCACGGTCACGAAAATCAGGGAGCGAGAATACCTGGGGGAGGGAGA…
117	ADOR3B16279	NA	NA	NA	NA	NA	NA	NA	NA	NA	NA	NA	NA	NA	NA	NA	NA	NA	NA	NA	NA	NA	NA	NA	NA	NA	NA	NA	NA	NA	NA	NA	NA	NA	NA	NA	NA	NA	NA	NA	2	NA	NA	NA	NA	NA	NA	ATGGACGACATCCAAAGGGAGGACTCTGCCCGACTCAGTCTCTGGTGGATGGGAAATAGGATTTTCCAACATCCAACGCGCGGTGGTGGCCAAACGGCCTCGGCCCGTTTCCTGGTCGTTACCATTTGCATTGGAATTCCGAAGCGTATTCCGGCTGCCGTTCCTGCGTGGGATGTGCAAGTTGTTGGAATTCTCGTTCTCGTGGAAAATATCAAATATCGTGAAAATCTTAGCGGAGAATTCGAGAGGAAGCTAGAAAGAATTGATATAAAAATCTCGTTTGGATTGATTACTTTTCTAAAAAAGGAAGCATTTTGGAACGCGCAAATAGCATGTTCACAG
118	ADOR3B16318	NA	NA	NA	NA	NA	NA	NA	NA	NA	NA	NA	NA	NA	NA	NA	NA	NA	NA	NA	NA	NA	NA	NA	NA	NA	NA	NA	NA	NA	NA	NA	NA	NA	NA	NA	NA	NA	NA	NA	1	NA	NA	NA	NA	NA	NA	ATGAGCGGAGATGATTGGATAGCGGTGTCCTTCGGCGTGGCGAAGAGGAAACGGTCGATCGGCCTTGACATTAGCATTCGAGGTAAAACGGAGTTGGAG
119	ADOR3B16379	NA	NA	NA	NA	NA	NA	NA	NA	NA	NA	NA	NA	NA	NA	NA	NA	NA	NA	NA	NA	NA	NA	NA	NA	NA	NA	NA	NA	NA	NA	NA	NA	NA	NA	NA	NA	NA	NA	NA	1	NA	NA	NA	NA	NA	NA	GTGATCCAGGTTGCCCAGGATATCCAGGTTGCCCAGGATATCCAGGTTGCCCAGGATATCCAGGTTTTGGCGGAGTTCCAGGTATTCCAGGTGTTCCAGGTTGGCCAGGATATCCCGGCTCTCCTGGTTTTCCAGGTGATCCAGGTTGCCCAGGATATCCAGGTTGTGGCGGAATTCCAGGTATTCCGGGTGTTCCAGGTT
120	ADOR3B16408	NA	NA	NA	NA	NA	NA	NA	NA	NA	NA	NA	NA	NA	NA	NA	NA	NA	NA	NA	NA	NA	NA	NA	NA	NA	NA	NA	NA	NA	NA	NA	NA	NA	NA	NA	NA	NA	NA	NA	1	NA	NA	NA	NA	NA	NA	TAAATAAACGTTCTAAGTCGAAGTTTTTCCATCCGAGTTCGGGTCACGTTCGTCACGGAAGCCAGCTNNNNNNNNNNNNNNNNNNNNNNNNNNNNNNNNNNNNNNNNNNNNNNNNNNNNNNNNNNNNNNNNNNNNNNNNNNNNNNNNNNNNNNNNNNNNNNNNNNNNNNNNNNNNNNNNNNNNNNNNNNNNNNNNNNNNNNNNNNNNNNNNNNNNNNNNNNNNNNNNNNNNNNNNNNNNNNNNNNNNNNNNNNNNNNNNNNNNNNNNNNNNNNNNNNNNNNNNNNNNNNNNNNNNNNNNNNNNNNNNNNNNNNNNNNNNNNNNNNNNNNNNNNNNNNNNNNNNNNNNNNNNNNNNNNNNNNNNNNNNNNNNNNNNNNNTTGGGCGGGCTCGGCTTGTTG…
121	ADOR3B16468	NA	NA	NA	NA	NA	NA	NA	NA	NA	NA	NA	NA	NA	NA	NA	NA	NA	NA	NA	NA	NA	NA	NA	NA	NA	NA	NA	NA	NA	NA	NA	NA	NA	NA	NA	NA	NA	NA	NA	2	NA	NA	NA	NA	NA	NA	ATGAGCAAAGTTCCTTTCGTAAGTTTGACGTTGGACATTGTTGTAAATTGA
122	ADOR3B16775	NA	NA	NA	NA	NA	NA	NA	NA	NA	NA	NA	NA	NA	NA	NA	NA	NA	NA	NA	NA	NA	NA	NA	NA	NA	NA	NA	NA	NA	NA	NA	NA	NA	NA	NA	NA	NA	NA	NA	1	NA	NA	NA	NA	NA	NA	ATGCAGTATGAATTATCGCAATTCGACGATAAACTCGTGGATGCAAACGAATTAAAAGGAGGAAATTTGATAGATCGAGACGGAAGGACATTAGAAGACAAACTG
123	ADOR3B16831	NA	NA	NA	NA	NA	NA	NA	NA	NA	NA	NA	NA	NA	NA	NA	NA	NA	NA	NA	NA	NA	NA	NA	NA	NA	NA	NA	NA	NA	NA	NA	NA	NA	NA	NA	NA	NA	NA	NA	1	NA	NA	NA	NA	NA	NA	CACATTAAAAAGGCGAACAACGCGAGGAAAGGAGTTTTGGCAAAATGA
124	ADOR3B16834	NA	NA	NA	NA	NA	NA	NA	NA	NA	NA	NA	NA	NA	NA	NA	NA	NA	NA	NA	NA	NA	NA	NA	NA	NA	NA	NA	NA	NA	NA	NA	NA	NA	NA	NA	NA	NA	NA	NA	1	NA	NA	NA	NA	NA	NA	ATGTCACGTGACTTATTATATCCGAGGCGTGTGCGGTGGAGTGAGTGGCTCTCCGCCTNNNNNNNNNNNNNNNNNNNNNNNNNNNNNNNNNNNNNNNNNNNNNNNNNNNNNNNNNNNNNNNNNNNNNNNNNNNNNNNNNNNNNNNNNNNNNNNNNNNNNNNNNNNNNNNNNNNNNNNNNNNNNNNNNNNNNNNNNNNNNNNNNNNNNNNNNNNNNNNNNNNNNNNNNNNNNNNNNNNNNNNNNNNNNNNNNNNNNNNNNNNNNNNNNNNNNNNNNNNNNNNNNNNNNNNNNNNNNNNNNNNNNNNNNNNNNNNNNNNNNNNNNNNNNNNNNNNNNNNNNNNNNNNNNNNNNNNNNNNNNNNNNNNNNNNNNNNNNNNNNNNNNNNNNNNNNNNNNNNNN…
125	ADOR3B16851	NA	NA	NA	NA	NA	NA	NA	NA	NA	NA	NA	NA	NA	NA	NA	NA	NA	NA	NA	NA	NA	NA	NA	NA	NA	NA	NA	NA	NA	NA	NA	NA	NA	NA	NA	NA	NA	NA	NA	1	NA	NA	NA	NA	NA	NA	ATGCTTTCAAAATGCAAAATAATAAATCTAAAAAGTCTACAACGATCAAAAACTCCTTACAACCATTCACATCGTCCATTTCCAAAAGTCTATAACGAATCAACAACGATCAAAAACTCCTTACAACCATCCACATGGTCCATTTCCAAAAGTCTACAACGAATCAACAACGATCAAAAACTCTTTACAACCATCCACATGGTCCATTTCCAAAAGTCTACAATGAATCAACAACGATCAAAAACTCCTTACAACCATCCACATGGTTCATTTCCAAAAGTCTACAACGAATCAACAACGATCAAAAACTCTTTACAACCATCCACATCGTCCATTTCCACGTAA
126	ADOR3B17041	NA	NA	NA	NA	NA	NA	NA	NA	NA	NA	NA	NA	NA	NA	NA	NA	NA	NA	NA	NA	NA	NA	NA	NA	NA	NA	NA	NA	NA	NA	NA	NA	NA	NA	NA	NA	NA	NA	NA	1	NA	NA	NA	NA	NA	NA	ATGGGCTATGAACATTCAAATGAATATGTAGGGAGCAATAAATGCCAG
127	ADOR3B17168	NA	NA	NA	NA	NA	NA	NA	NA	NA	NA	NA	NA	NA	NA	NA	NA	NA	NA	NA	NA	NA	NA	NA	NA	NA	NA	NA	NA	NA	NA	NA	NA	NA	NA	NA	NA	NA	NA	NA	3	NA	NA	NA	NA	NA	NA	ATGCCACTAACTTCTAAAGAACTTCAAAGATTTATAGTTGGAACAAATAAGAAAATTCTAATTTTTCCAAGTTTATTTTGTGATGAACAGACTATAGCTTTCAAAAGAAGGATAAGCCTGAAAATCTATAATCCAAAAAAACGAGGATATAAAATCAATAATCAAATCAGTTCCGAAGAAGTATCTGGAAAACCAAACTTAGGCGTAGCTAGCAACATAGTAATGCGAATGTGTAAAATTATTCCAAGGAATATCAATCATAAAGTATTTTATGATAACTATTTTTCTAATTTTATGGCATATTTACGTAATCTAGGGATTCAGAGTGTTGCAACTAGTTGTTGCAAGTTAGTTATAGTTGAAATTGTTATCCTGAAAATAAATCAACTACATGAGTTT…
128	ADOR3B17208	NA	NA	NA	NA	NA	NA	NA	NA	NA	NA	NA	NA	NA	NA	NA	NA	NA	NA	NA	NA	NA	NA	NA	NA	NA	NA	NA	NA	NA	NA	NA	NA	NA	NA	NA	NA	NA	NA	NA	1	NA	NA	NA	NA	NA	NA	ATGACCGGTTGGGGTTGCTTCTGCGGCTTCGCCCGGAGGGGGTCGAAATTCAGATCCCGTAACAGAGAGAGAAAGAGAGAGAGAGAGAGAGAGAGAGAGAGAGAGAGAGAGAGGTGTGCGGGCCNNNNNNNNNNNNNNNNNNNNNNNNNNNNNNNNNNNNNNNNNNNNNNNNNNNNNNNNNNNNNNNNNNNNNNNNNNNNNNNNNNNNNNNNNNNNNNNNNNNNNNNNNNNNNNNNNNNNNNNNNNNNNNNNNNNNNNNNNNNNNNNNNNNNNNNNNNNNNNNNNNNNNNNNNNNNNNNNNNNNNNNNNNNNNNNNNNNNNNNNNNNNNNNNNNNNNNNNNNNNNNNNNNNNNNNNNNNNNNNNNNNNNNNNNNNNNNNNNNNNNNNNNNNNNNNNNNN…
129	ADOR3B17242	NA	NA	NA	NA	NA	NA	NA	NA	NA	NA	NA	NA	NA	NA	NA	NA	NA	NA	NA	NA	NA	NA	NA	NA	NA	NA	NA	NA	NA	NA	NA	NA	NA	NA	NA	NA	NA	NA	NA	2	NA	NA	NA	NA	NA	NA	ATGATCCTGGAGCCTGAGACGACACTTCTAGCTATGCCAATCTCAATGATTGAGTCAATCAGGAGACTGGTTCACAGGCAACTGTTATTGGACACTACTTATGTACTCCTATTGCACACACTTATGTACCCCACTGAAGATCTGCAAGCTCACGAGATGAATGGAGCTCATGGAGGAGACTTTAGA
130	ADOR3B17341	NA	NA	NA	NA	NA	NA	NA	NA	NA	NA	NA	NA	NA	NA	NA	NA	NA	NA	NA	NA	NA	NA	NA	NA	NA	NA	NA	NA	NA	NA	NA	NA	NA	NA	NA	NA	NA	NA	NA	1	NA	NA	NA	NA	NA	NA	ATGTTGAACCGACTAAAAGAGAGGGGTATAAACGGGTGGCTGGTGGGATCGTGGGAGGAGGTGGGGCTGCCGGNGTACGACCAAGCTTTTCCCGATATTTCCTCCCTTTTTCTTTTTTCTCTTCCCTGTCTCTTTCTCTCCCTCCCTCCCTCCCTCGCTCCTCTCCTAATGAATTTAATCGAAAGTCATTCGATTCTTTCTCTTTCCCCCTTCCTCTTCCCCTCCCCCTCCTCCCCACGTAAAGATTTCTTCGTTCCATCGTCCCGTGTTCCGCAAATTTTTCCCAAGAGTTTTCAAAAGGGGGAAGAGGGTTAA
131	ADOR3B17350	NA	NA	NA	NA	NA	NA	NA	NA	NA	NA	NA	NA	NA	NA	NA	NA	NA	NA	NA	NA	NA	NA	NA	NA	NA	NA	NA	NA	NA	NA	NA	NA	NA	NA	NA	NA	NA	NA	NA	9	NA	NA	NA	NA	NA	NA	ATGATGAAGCGTGTAAAAACGGCCGAAAACTGCGTAATAACAGGGAACGAAAATCGAGCGCGCTCTTCCTCGAAGAGGAAGAATCCTATAACGTTACGGGGACGAAACATTCGGCCATTTTGTTTGCCTTTCAGGAGGACGAGCCGCTCGTTCTCGCGGATAATTGTCGCGATTAATACGAACGTTAACGGTAAAAGGTGGAAAGAAGAAACGGAGAGAGGGTGCACGTGCCGCGAGGAAAAAGAAGCGAGGAGGGAAAAACGTGGAAAAGACGTGATGGCAACGGTGCCTGCGCGCAACAGTACAGTTTCTGGAATGTAA
132	ADOR3B17351	NA	NA	NA	NA	NA	NA	NA	NA	NA	NA	NA	NA	NA	NA	NA	NA	NA	NA	NA	NA	NA	NA	NA	NA	NA	NA	NA	NA	NA	NA	NA	NA	NA	NA	NA	NA	NA	NA	NA	1	NA	NA	NA	NA	NA	NA	ATGCTATTACATTGGCTCACAAGTAATGCTGAGGATAAAGAAGTTAATGAAATAAAG
133	ADOR3B17352	NA	NA	NA	NA	NA	NA	NA	NA	NA	NA	NA	NA	NA	NA	NA	NA	NA	NA	NA	NA	NA	NA	NA	NA	NA	NA	NA	NA	NA	NA	NA	NA	NA	NA	NA	NA	NA	NA	NA	18	NA	NA	NA	NA	NA	NA	ATGGAATACTCTACTTGTAACGAATATGTTAAATTTGTTAAATTTGTTAAAACGCTCTCATCAAATTCCTTCATCANNNNNNNNNNNNNNNNNNNNNNNNNNNNNNNNNNNNNNNNNNNNNNNNNNNNNNNNNNNNNNNNNNNNNNNNNNNNNNNNNNNNNNNNNNNNNNNNNNNNNNNNNNNNNNNNNNNNNNNNNNNNNNNNNNNNNNNNNNNNNNNNNAAAAAAAAAAAAAATACTCCATTTCCTATTACTCCATAATAACAAAAATTCCATCTTACAAATTATTACGAACACATTCAAAAAAACCTATATAACAAAATAA
134	ADOR3B17432	NA	NA	NA	NA	NA	NA	NA	NA	NA	NA	NA	NA	NA	NA	NA	NA	NA	NA	NA	NA	NA	NA	NA	NA	NA	NA	NA	NA	NA	NA	NA	NA	NA	NA	NA	NA	NA	NA	NA	1	NA	NA	NA	NA	NA	NA	ATGGAGTATGGAGTCGAAGCTGGTGTTATTAATAGCGAATCCTGA
135	ADOR3B17530	NA	NA	NA	NA	NA	NA	NA	NA	NA	NA	NA	NA	NA	NA	NA	NA	NA	NA	NA	NA	NA	NA	NA	NA	NA	NA	NA	NA	NA	NA	NA	NA	NA	NA	NA	NA	NA	NA	NA	1	NA	NA	NA	NA	NA	NA	ATGCTGTGTGGTATACCGGTTAATCCACCAGTAGGAGGAGCTGAAGTAGGGCCTCCAGCCCCACCGCCGCCTACCGTTGGACCCGTAGGGCCTGTAGGACCCCCGGCGCCTGCACCGCCTGCAGAGGAGTTCGGTCCGCCACCACCCCCACCACCANNNNNNNNNNNNNNNNNNNNNNNNNNNNNNNNNNNNNNNNNNNNNNNNNNNNNNNNNNNNNNNNNNNNNNNNNNNNNNNNNNNNNNNNNNNNNNNNNNNNNNNNNNNNNNNNNNNNNNNNNNNNNNNNNNNNNNNNNNNNNNNNNNNNNNNNNNNNNNNNNNNNNNNNNNNNNNNNNNNNNNNNNNNNNNNNNNNNNNNNNNNNNNNNNNNNNNNNNNNNNNNNNNNNNNNNNNNNNNNNNNN…
136	ADOR3B17534	NA	NA	NA	NA	NA	NA	NA	NA	NA	NA	NA	NA	NA	NA	NA	NA	NA	NA	NA	NA	NA	NA	NA	NA	NA	NA	NA	NA	NA	NA	NA	NA	NA	NA	NA	NA	NA	NA	NA	1	NA	NA	NA	NA	NA	NA	ATGACGATTTATATTATTATTATAATTATTATGATTATCATTATATATATATATATTATATTAATATTATTATTATTATTATTATTATTAATATTATTATCATCATTATCATTATCATTATTATCATTATCATTATCATTATCATTATCATTATCATTATCATTATCNNNNNNNNNNNNNNNNNNNNNNNNNNNNNNNNNNNNNNNNNNNNNNNNNNNNNNNNNNNNNNNNNNNNNNNNNNNNNNNNNNNNNNNNNNNNNNNNNNNNNNNNNNNNNNNNNNNNNNNNNNNNNNNNNNNNNNNNNNNNNNNNNNNNNNNNNNNNNNNNNNNNNNNNNNNNNNNNNNNNNNNNNNNNNNNNNNNNNNNNNNNNNNNNNNNNNNNNNNNNNNNNNNNNNNNN…
137	ADOR3B17568	NA	NA	NA	NA	NA	NA	NA	NA	NA	NA	NA	NA	NA	NA	NA	NA	NA	NA	NA	NA	NA	NA	NA	NA	NA	NA	NA	NA	NA	NA	NA	NA	NA	NA	NA	NA	NA	NA	NA	1	NA	NA	NA	NA	NA	NA	AATGCAAATAACAGAGTGAGATTTGATAGGGTACAATTAGAATTAGGTTTAGATTTGAAGTTA
138	ADOR3B17741	NA	NA	NA	NA	NA	NA	NA	NA	NA	NA	NA	NA	NA	NA	NA	NA	NA	NA	NA	NA	NA	NA	NA	NA	NA	NA	NA	NA	NA	NA	NA	NA	NA	NA	NA	NA	NA	NA	NA	1	NA	NA	NA	NA	NA	NA	ATGTCATTTGTTAATTTAAATATCACGATAATTCAGTCTGCCTCTCTGTCTCGGCCCAGCAGCCTCCTCTCCCGTCCTTTTANNNNNNNNNNNNNNNNNNNNNNNNNNNNNNNNNNNNNNNNNNNNNNNNNNNNNNNNNNNNNNNNNNNNNNNNNNNNNNNNNNNNNNNNNNNNNNNNNNNNNNNNNNNNNNNNNNNNNNNNNNNNNNNNNNNNNNNNNNNNNNNNNNNNNNNNNNNNNNNNNNNNNNNNNNNNNNNNNNNNNNNNNNNNNNNNNNNNNNNNNNNNNNNNNNNNNNNNNNNNNNNNNNNNNNNNNNNNNNNNNNNNNNNNNNNNNNNNNNNNNNNNNNNNNNNNNNNNNNNNNNNNNNNNNNNNNNNNNNNNNNNNNNNNNNNNNNNNN…
139	ADOR3B17840	NA	NA	NA	NA	NA	NA	NA	NA	NA	NA	NA	NA	NA	NA	NA	NA	NA	NA	NA	NA	NA	NA	NA	NA	NA	NA	NA	NA	NA	NA	NA	NA	NA	NA	NA	NA	NA	NA	NA	2	NA	NA	NA	NA	NA	NA	ATGGAGACGGACATTCTGTCCGTCGCGACATTTCAGTTCCTTGTAATCTCCGTTGACAAAACAAGCTATCTTCCCAGAATAATAGGTCCAACTTGCTCCAGTCTTAACAATCGGAAGCAAGGTTTTTCCGAACCCAAAGGTGACAAAATATCTACGTCATCCGCTTCCCTTCGTAAAGGTGCAGCTGAAAGTATAATGCTTCACAACATCAGGCGGGCCAAGTCGATATAA
140	ADOR3B17842	NA	NA	NA	NA	NA	NA	NA	NA	NA	NA	NA	NA	NA	NA	NA	NA	NA	NA	NA	NA	NA	NA	NA	NA	NA	NA	NA	NA	NA	NA	NA	NA	NA	NA	NA	NA	NA	NA	NA	1	NA	NA	NA	NA	NA	NA	ATGCCTTCCGGACAGCTAGTAATATTGATAATCGGCCAACATCGCATAATACGCAGGGAGTGCGGATCATCCGACGCCGATACATCAGAGCCTGGAGAAGAAGAGTTTTCAACT
141	ADOR3B17911	NA	NA	NA	NA	NA	NA	NA	NA	NA	NA	NA	NA	NA	NA	NA	NA	NA	NA	NA	NA	NA	NA	NA	NA	NA	NA	NA	NA	NA	NA	NA	NA	NA	NA	NA	NA	NA	NA	NA	1	NA	NA	NA	NA	NA	NA	ATGGACGAGGCGAGTAGCGNNNNNNNNNNNNNNNNNNNNNNNNNNNNNNNNNNNNNNNNNNNNNNNNNNNNNNNNNNNNNNNNNNNNNNNNNNNNNNNNNNNNNNNNNNNNNNNNNNNNNNNNNNNNNNNNNNNNNNNNNNNNNNNNNNNNNNNNNNNNNNNNNNNNNNNNNNNNNNNNNNNNNNNNNNNNNNNNNNNNNNNNNNNNNNNNNNNNNNNNNNNNNNNNNNNNNNNNNNNNNNNNNNNNNNNNNNNNNNNNNNNNNNNNNNNNNNNNNNNNNNNNNNNNNNNNNNNNNNNNNNNNNNNNNNNNNNNNNNNNNNNNNNNNNNNNNNNNNNNNNNNNNNNNNNNNNNNNNNNNNNNNNNNNNNNNNNNNNNNNNNNNNNNNNNNNNNNNNNNN…
142	ADOR3B17932	NA	NA	NA	NA	NA	NA	NA	NA	NA	NA	NA	NA	NA	NA	NA	NA	NA	NA	NA	NA	NA	NA	NA	NA	NA	NA	NA	NA	NA	NA	NA	NA	NA	NA	NA	NA	NA	NA	NA	2	NA	NA	NA	NA	NA	NA	ATGAGAAATGTTGTCTGCGAAACCGCGTGTTGCAACGAAACCAGTGACCCAGAGAACGACGAGGCGAACGTGAAGACGGAAAGACGTTGCGGTGTGTCCGCGTTACGAAGAAGTGTTAAACAAACTGGGAATTTCATGGAAGGACCCACCAGAGTTCCAACCAGAGTTCCTCGAGACGAGATTTCCACGAGAAGCGGGAAGAACAACGCCCCGCCTTTGCCTGTAGCATCCGTAACGCCGATGTTTATCCACAAGTTATGCTGTTCGGATTTCGCTATTCTCATCGAGTTTGGCGGTGTGCCAGGAACCTAA
143	ADOR3B18038	NA	NA	NA	NA	NA	NA	NA	NA	NA	NA	NA	NA	NA	NA	NA	NA	NA	NA	NA	NA	NA	NA	NA	NA	NA	NA	NA	NA	NA	NA	NA	NA	NA	NA	NA	NA	NA	NA	NA	1	NA	NA	NA	NA	NA	NA	ATGCAAAAGAAACCGTTCTCAACCCCCCTCCCCCAGGGCCGAGGGTGGATAACCGTAATCCGGTCACGTTCCACAGAGAACGACTTTGTTTCCCAGGAAAATTTTCCGTCCTCCTTTACCCTCTCTGGACAAGTGGCGCAGCGGAGACGCGAGTGGAAGAGAACGAGAGAGGATCGGCGAGAGGAACCGTCAAGTGGCTCGGGAGGAAAGACGAAATCTCCGTTNNNNNNNNNNNNNNNNNNNNNNNNNNNNNNNNNNNNNNNNNNNNNNNNNNNNNNNNNNNNNNNNNNNNNNNNNNNNNNNNNNNNNNNNNNNNNNNNNNNNNNNNNNNNNNNNNNNNNNNNNNNNNNNNNNNNNNNNNNNNNNNNNNNNNNNNNNNNNNNNNNNNNNNNNNNNNNN…
144	ADOR3B18047	NA	NA	NA	NA	NA	NA	NA	NA	NA	NA	NA	NA	NA	NA	NA	NA	NA	NA	NA	NA	NA	NA	NA	NA	NA	NA	NA	NA	NA	NA	NA	NA	NA	NA	NA	NA	NA	NA	NA	1	NA	NA	NA	NA	NA	NA	ATGCCGGCACCCTGCCTCGGCGGCGAGGAGATGCCGGAGAAAAAGGGGCACCACCACGAAGAAGAAGAGGACGACGAAGAAGACGACGATGACGACGACGACGACGACGACAAGAAGGAAGAAGAAGTA
145	ADOR3B18099	NA	NA	NA	NA	NA	NA	NA	NA	NA	NA	NA	NA	NA	NA	NA	NA	NA	NA	NA	NA	NA	NA	NA	NA	NA	NA	NA	NA	NA	NA	NA	NA	NA	NA	NA	NA	NA	NA	NA	1	NA	NA	NA	NA	NA	NA	ATGGCACTTATGAAAATAGTTTTACGATTCGTCTTTTTTTTCTTTCTTTTTTTTTTTTTTTTTTTTTTTTTTAAAAAAAAAAAAAAAAAGAAACGTAAAAATATTTTCATAAAGGCCATTTTTTTTTTTTTTTTTAAAAAAAAAAAAAAAAAGAAACGTAAAAATATTTTCATAAAGGCCATTTTTTTTTTTTTTTTTTTTTTTTTTTTTTTTTTTCTTTTGGAAAGAATTTAA
146	ADOR3B18114	NA	NA	NA	NA	NA	NA	NA	NA	NA	NA	NA	NA	NA	NA	NA	NA	NA	NA	NA	NA	NA	NA	NA	NA	NA	NA	NA	NA	NA	NA	NA	NA	NA	NA	NA	NA	NA	NA	NA	1	NA	NA	NA	NA	NA	NA	ATGCTAATTCTCGATATAGCTCAAAACGATCATCCCTCCCTCGTAAACTACGGTGCATCGTATTCCGTACAACCGATACCGGTACATTGCCACCGTTACTTACTTTCTGTACTACAGGATACTACACAGCGTCTAATCAACGGGTACTTCATCCCCGCGGCGAACGAAGTTAGTAGCCACCGAGCAGGAGATGCCAGGCAACAAGCTCAAGGAACACGCCGCTCGCATCCCCAACCCATCTAA
147	ADOR3B18142	NA	NA	NA	NA	NA	NA	NA	NA	NA	NA	NA	NA	NA	NA	NA	NA	NA	NA	NA	NA	NA	NA	NA	NA	NA	NA	NA	NA	NA	NA	NA	NA	NA	NA	NA	NA	NA	NA	NA	1	NA	NA	NA	NA	NA	NA	CAATCTTATCGCATTGCAAATATTGCAAATACATCAAACGATACAACAAATACTTTGTCCCAATTGATATATCTCGATGCTTTTGCACAAGCACCTTTGGATATCGAAGCAATCGTGGACAGAAGTTGA
148	ADOR3B18145	NA	NA	NA	NA	NA	NA	NA	NA	NA	NA	NA	NA	NA	NA	NA	NA	NA	NA	NA	NA	NA	NA	NA	NA	NA	NA	NA	NA	NA	NA	NA	NA	NA	NA	NA	NA	NA	NA	NA	1	NA	NA	NA	NA	NA	NA	ATGTATTTGCACGTCCTCTTAGCTGCCTTGTTGCTCGAAGCTTCTCTTTCGCGCATTTCTACCTCCTTGGTAGTACTATCGAGCTCGCGGGACCCACCCCCCTTTTCTTGTGTATTTCTTTTTTTTTTCCCTCCTCGCACTTGTGTACTCCGTTACGAAGCGGCGGAAACACGGGAACCGGAAGCTTCTGTCTCCTTTCTCTTCCCCTCTCCATCGAGCCAAGAAATANNNNNNNNNNNNNNNNNNNNNNNNNNNNNNNNNNNNNNNNNNNNNNNNNNNNNNNNNNNNNNNNNNNNNNNNNNNNNNNNNNNNNNNNNNNNNNNNNNNNNNNNNNNNNNNNNNNNNNNNNNNNNNNNNNNNNNNNNNNNNNNNCGCAAGGTCTTCCCCTCCCTTCCCCCG…
149	ADOR3B18224	NA	NA	NA	NA	NA	NA	NA	NA	NA	NA	NA	NA	NA	NA	NA	NA	NA	NA	NA	NA	NA	NA	NA	NA	NA	NA	NA	NA	NA	NA	NA	NA	NA	NA	NA	NA	NA	NA	NA	1	NA	NA	NA	NA	NA	NA	ATGATCGCAACTGAGAAATCGAGGAAAATCAGGGAAATCAGGGACGATGGTAGGACAAAGTTCCAGCGAGATCGAAGAAGATGGCAATTGTTTCAATCAGAAAATATCCTAATCTTCGAGCTTTATCAGTTCTTACGAAGCTTTAAACGAAGCTTGTCCCGTGTTTCGAGCGGATTTGCTTCACAAAGAGGGGATTTTATGGACGAGATGGCGAGAGTTTGGCTCGACGCCTGA
150	ADOR3B18251	NA	NA	NA	NA	NA	NA	NA	NA	NA	NA	NA	NA	NA	NA	NA	NA	NA	NA	NA	NA	NA	NA	NA	NA	NA	NA	NA	NA	NA	NA	NA	NA	NA	NA	NA	NA	NA	NA	NA	1	NA	NA	NA	NA	NA	NA	ATGATCAGAAGAAGTAATGATCCAAATATCGTGAGATCCAGTAATCCAGTATTCCTCAGGCTCAATAATTCTAATAATGATGTGAGGGAATAA
151	ADOR3B18381	NA	NA	NA	NA	NA	NA	NA	NA	NA	NA	NA	NA	NA	NA	NA	NA	NA	NA	NA	NA	NA	NA	NA	NA	NA	NA	NA	NA	NA	NA	NA	NA	NA	NA	NA	NA	NA	NA	NA	3	NA	NA	NA	NA	NA	NA	ATGTTTGTCGAATATTTTACAACATATAGCGGATTATTGGGATTTTTATTGGGATTCCATTTTTTCAGTTCCATGTTTGTCGAATATTTTACAACATATAGCGGATTATTGGGATTTTTATTGGGATTCCATTTTTTCAGTTCCATGTTTGTCGAATATTTTACA
152	ADOR3B18411	NA	NA	NA	NA	NA	NA	NA	NA	NA	NA	NA	NA	NA	NA	NA	NA	NA	NA	NA	NA	NA	NA	NA	NA	NA	NA	NA	NA	NA	NA	NA	NA	NA	NA	NA	NA	NA	NA	NA	1	NA	NA	NA	NA	NA	NA	GTTAGCGCCCAATTGGCTATCACACCCCACCCCGGAGGGAAAGAAGGTATACCGGAAAGGCGACCATTAGGCAAGACTTATAAGGTGGCTACTGCCACCAAGGTGGTCGTAGGATCCTCTTAG
153	ADOR3B18507	NA	NA	NA	NA	NA	NA	NA	NA	NA	NA	NA	NA	NA	NA	NA	NA	NA	NA	NA	NA	NA	NA	NA	NA	NA	NA	NA	NA	NA	NA	NA	NA	NA	NA	NA	NA	NA	NA	NA	1	NA	NA	NA	NA	NA	NA	ATGTTAGAAGAAATCAGAAGAAAAAAACTTCAAGCTGAACAACTTCAAGATATTGGAATCTTTTTTGAAACT
154	ADOR3B18522	NA	NA	NA	NA	NA	NA	NA	NA	NA	NA	NA	NA	NA	NA	NA	NA	NA	NA	NA	NA	NA	NA	NA	NA	NA	NA	NA	NA	NA	NA	NA	NA	NA	NA	NA	NA	NA	NA	NA	1	NA	NA	NA	NA	NA	NA	ATGAGACCCGGTAATCGATTTCCAATTTTTTTTTTTCAAAATTTTTGTCCACGTCAAAAAAAAATATTCATTTCGTTAAAAAGTTTATAA
155	ADOR3B18589	NA	NA	NA	NA	NA	NA	NA	NA	NA	NA	NA	NA	NA	NA	NA	NA	NA	NA	NA	NA	NA	NA	NA	NA	NA	NA	NA	NA	NA	NA	NA	NA	NA	NA	NA	NA	NA	NA	NA	1	NA	NA	NA	NA	NA	NA	TCCTTGGAACTACAATTACAATTATATTCACTATATTTCGTGCAAAACATACTACCACGCAAGATATTAATTTCTACGATCAAGAAACAAAACTTCACTTCCTTACAACTCTTGCTTCCACCCGAAGCAAAATCGAGACTAACAACAAAACCCAACGACTTCCAACTTCGCAAACACCAT
156	ADOR3B18600	NA	NA	NA	NA	NA	NA	NA	NA	NA	NA	NA	NA	NA	NA	NA	NA	NA	NA	NA	NA	NA	NA	NA	NA	NA	NA	NA	NA	NA	NA	NA	NA	NA	NA	NA	NA	NA	NA	NA	1	NA	NA	NA	NA	NA	NA	ATGGTTTCGGCGGCGCTGGAGTCGCTTTGGGTGACAATCGCTGACGCACCTACCAGATGGCGCATCGCGTGCAGTGTCACTCCAGCTGAC
157	ADOR3B18640	NA	NA	NA	NA	NA	NA	NA	NA	NA	NA	NA	NA	NA	NA	NA	NA	NA	NA	NA	NA	NA	NA	NA	NA	NA	NA	NA	NA	NA	NA	NA	NA	NA	NA	NA	NA	NA	NA	NA	2	NA	NA	NA	NA	NA	NA	ATGATCACAATTTTCTCGAATTTTATATTTCAAATTATGAAATATTTAAAACAGAAAAAATATATCGACCAATCCAAAAAATATAAGCCAAAATTTTTCTTTAAATTTAAAATAACAATCATTCTTAAAAACGTATGTATAAAGTAA
158	ADOR3B18667	NA	NA	NA	NA	NA	NA	NA	NA	NA	NA	NA	NA	NA	NA	NA	NA	NA	NA	NA	NA	NA	NA	NA	NA	NA	NA	NA	NA	NA	NA	NA	NA	NA	NA	NA	NA	NA	NA	NA	4	NA	NA	NA	NA	NA	NA	ATGCCACGAGAATCGAATAAGTTTCCTCCTACGAGAACTTTCCTATGTATCCTATATACATATTTTTATCTTGTATTCGTTCTTCGTTCGACCATCACAAACCGAAAGAAAGAAATTTTTAATCTTCGTGTATTATATCTTTATATGATACGGAGATATCATTATATAATTATTGGGCTGAGAATATTTCAACGGATAAAATCCCCATACATAAGTTTTTTCGATCGAAAAAAAATTTCACGACGCGATCATTGGAAAATCATGGGCGGAAATTCTCTGGCGCCTAAAAATTTCATCCAATATAGGAAATCCTAA
159	ADOR3B18668	NA	NA	NA	NA	NA	NA	NA	NA	NA	NA	NA	NA	NA	NA	NA	NA	NA	NA	NA	NA	NA	NA	NA	NA	NA	NA	NA	NA	NA	NA	NA	NA	NA	NA	NA	NA	NA	NA	NA	11	NA	NA	NA	NA	NA	NA	ATGAAGTGCAGTGAGAATGCGCGCAACTTTAGACGCCTTGCTGCTCGTTTCTTCTCCGCTTCCTTTCATTTTCGTCCCTCCTTGCGTATCTTCTTTTTTCCTTCCTTTTCTTTCTCTCCGCCTTCTCGCGTCCTCCTCTCCACCCTCTCTTTCTTTTTTTTTTTTTTTCTCATCCCTCGAGGCGTATTTTTTTCGATCTATTTCTTTCGTCGGAAAAGTGAATTTTCTCTCGTATTTTCGACCGATGTTTTAATCTATGGATATTGA
160	ADOR3B18669	NA	NA	NA	NA	NA	NA	NA	NA	NA	NA	NA	NA	NA	NA	NA	NA	NA	NA	NA	NA	NA	NA	NA	NA	NA	NA	NA	NA	NA	NA	NA	NA	NA	NA	NA	NA	NA	NA	NA	3	NA	NA	NA	NA	NA	NA	NNNNNNNNNNNNNNNNNNNNNNNNNNNNNNNNNNNNNNNNNNNNNNNNNNNNNNNNNNNNNNNNNNNNNNNNNNNNNNNNNNNNNNNNNNNNNNNNNNNNNNNNNNNNNNNNNNNNNNNNNNNNNNNNNNNNNNNNNNNNNNNNTGTGTATATATATATATATATATATATATATATAATATAATAATTTCTATTCATTCTTCATTCTCAATTGTCAATTGA
161	ADOR3B18671	NA	NA	NA	NA	NA	NA	NA	NA	NA	NA	NA	NA	NA	NA	NA	NA	NA	NA	NA	NA	NA	NA	NA	NA	NA	NA	NA	NA	NA	NA	NA	NA	NA	NA	NA	NA	NA	NA	NA	7	NA	NA	NA	NA	NA	NA	AGGCGAAANNNNNNNNNNNNNNNNNNNNNNNNNNNNNNNNNNNNNNNNNNNNNNNNNNNNNNNNNNNNNNNNNNNNNNNNNNNNNNNNNNNNNNNNNNNNNNNNNNNNNNNNNNNNNNNNNNNNNNNNNNNNNNNNNNNNNNNNNNNNNNNNNNNNNNNNNNNNNNNNNNNNNNNNNNNNNNNTTTGCTTTAAAAAAATACACCGTGGAAATTCTTAGCCTCTGA
162	ADOR3B18672	NA	NA	NA	NA	NA	NA	NA	NA	NA	NA	NA	NA	NA	NA	NA	NA	NA	NA	NA	NA	NA	NA	NA	NA	NA	NA	NA	NA	NA	NA	NA	NA	NA	NA	NA	NA	NA	NA	NA	8	NA	NA	NA	NA	NA	NA	AAAATTTCCAAAAGAAGAGAAGAATTCACAATGCAATTCGAAATCGTGTGCCACCCTCGCACAGCCGTGGCGGGAAATTTCGATTCTATTAAATCAAACATAAGCCGAAATCAACCGCGTCGCCACGTTAATTTAGCCAGGAAAAAGGGACGACATCTCTGCTCGGATCGTGATATCATGTGCAATCATTAG
163	ADOR3B18673	NA	NA	NA	NA	NA	NA	NA	NA	NA	NA	NA	NA	NA	NA	NA	NA	NA	NA	NA	NA	NA	NA	NA	NA	NA	NA	NA	NA	NA	NA	NA	NA	NA	NA	NA	NA	NA	NA	NA	4	NA	NA	NA	NA	NA	NA	CAACTCTGCTCAAGAGTGACAAGAATATACATTTTCATTTCCATCCGTAATTTTTATCGCAATAGAAACAGATTTAAGTTAAAAGATTCGAATGCGCTTAATTATATTCATTCGAAATTATTATCTCGAAATTAA
164	ADOR3B18674	NA	NA	NA	NA	NA	NA	NA	NA	NA	NA	NA	NA	NA	NA	NA	NA	NA	NA	NA	NA	NA	NA	NA	NA	NA	NA	NA	NA	NA	NA	NA	NA	NA	NA	NA	NA	NA	NA	NA	1	NA	NA	NA	NA	NA	NA	ATGGATGAAATATTTTCTGGGAGGAAGGATTTTTTGGGGAGGGGGGTATTGATATTAGCGTTTTTTTCTTTTTTTTTTTTTGGATTTGTTACTATTATATACTTTCTTTTCGACGAAGAGAAAATTATATGCAGAGTTACATTTCTTCCTTTAAATGGAATTGAAAGTTTAATTATAAAATTGTGTCTAGGATGTGATGAAGAGGGGTAG
165	ADOR3B18675	NA	NA	NA	NA	NA	NA	NA	NA	NA	NA	NA	NA	NA	NA	NA	NA	NA	NA	NA	NA	NA	NA	NA	NA	NA	NA	NA	NA	NA	NA	NA	NA	NA	NA	NA	NA	NA	NA	NA	11	NA	NA	NA	NA	NA	NA	ATGCCAAGCTTCTTTCTCTCATTCTCCGTCCCCGTGGCCGTGAAACATCAGAATAATCCGGAATACGTTGTCCGCCTCCACCGCGTTAGAATAATTTTCCAAAACGTTTCGAGGTTAAGGGAGAGGGGGGGAGGGGAGCATTGTTATCCCCTCGCGTACACATCCTCCATAATACACACCCGTTTACGTGGAACGTCAGACCGTGGCTGA
166	ADOR3B18861	NA	NA	NA	NA	NA	NA	NA	NA	NA	NA	NA	NA	NA	NA	NA	NA	NA	NA	NA	NA	NA	NA	NA	NA	NA	NA	NA	NA	NA	NA	NA	NA	NA	NA	NA	NA	NA	NA	NA	1	NA	NA	NA	NA	NA	NA	ATGACAATGTAA
167	ADOR3B19006	NA	NA	NA	NA	NA	NA	NA	NA	NA	NA	NA	NA	NA	NA	NA	NA	NA	NA	NA	NA	NA	NA	NA	NA	NA	NA	NA	NA	NA	NA	NA	NA	NA	NA	NA	NA	NA	NA	NA	1	NA	NA	NA	NA	NA	NA	ATGCTGCGAGGAGGCGCGCGATCGACGATAGGGGAGGCTGATGCTCCGTTGCTACCGAGTTCCGTTCCGAGAGAGTCGAGCGACGGAGTCGACGAGTCGGCCAACTCTCTCTCTCTCTCNNNNNNNNNNNNNNNNNNNNNNNNNNNNNNNNNNNNNNNNNNNNNNNNNNNNNNNNNNNNNNNNNNNNNNNNNNNNNNNNNNNNNNNNNNNNNNNNNNNNNNNNNNNNNNNNNNNNNNNNNNNNNNNNNNNNNNNNNNNNNNNNNNNNNNNNNNNNNNNNNNNNNNNNNNNNNNNNNNNNNNNNNNNNNNNNNNNNNNNNNNNNNNNNNNNNNNNNNNNNNNNNNNNNNNNNNNNNNNNNNNNNNNNNNNNNNNNNNNNNNNNNNNNNNNNNNNNNNNNN…
168	ADOR3B19406	NA	NA	NA	NA	NA	NA	NA	NA	NA	NA	NA	NA	NA	NA	NA	NA	NA	NA	NA	NA	NA	NA	NA	NA	NA	NA	NA	NA	NA	NA	NA	NA	NA	NA	NA	NA	NA	NA	NA	1	NA	NA	NA	NA	NA	NA	ATGGAAGAAGAATGGATAGGTCTTCTTTTCGCGGGGATGAAGGAATTTGGATTTTTGGAATCCTTT
169	ADOR3B19501	NA	NA	NA	NA	NA	NA	NA	NA	NA	NA	NA	NA	NA	NA	NA	NA	NA	NA	NA	NA	NA	NA	NA	NA	NA	NA	NA	NA	NA	NA	NA	NA	NA	NA	NA	NA	NA	NA	NA	1	NA	NA	NA	NA	NA	NA	ATGGAGAAAGCCGCGAGAGAAGAAGGTCACTGTTCGAAAGGGGAGAAACCTTGCCAGGAGCGAGGAAGAGGACTGCGCGAGACAAAAGGGAAGAGGGAGGGAGAGGCGAGTAGGCAAGCAGCAGCAGCATCAGCAGCAACCGGGAGGAGAGAGAAGGCAGCCGAGAAAGAGCCGATAGGATGTTGCGCACCTGCTTACCTCGAGGCGGCGCGATACTTCTTGCCTAAGCTATTCCAGCTCTCTGCCGTTCTTCCTTCTTCAACCGAGAACCTTCTGCTCTCCCTCGATCCTTTCCTCCCGCTCTCCTTCGCCGTGATCTGGTTACGCAGGATAGAAACTGGCAGGGTCGCTGCTACGCCGATGCGTCACGGTGATCCTGTCCTCTTCGGTATTAGCATG…
170	ADOR3B19602	NA	NA	NA	NA	NA	NA	NA	NA	NA	NA	NA	NA	NA	NA	NA	NA	NA	NA	NA	NA	NA	NA	NA	NA	NA	NA	NA	NA	NA	NA	NA	NA	NA	NA	NA	NA	NA	NA	NA	1	NA	NA	NA	NA	NA	NA	ATGATTCGCGTCCGTCGAGGTTTTCTCGAAAACGANNNNNNNNNNNNNNNNNNNNNNNNNNNNNNNNNNNNNNNNNNNNNNNNNNNNNNNNNNNNNNNNNNNNNNNNNNNNNNNNNNNNNNNNNNNNNNNNNNNNNNNNNNNNNNNNNNNNNNNNNNNNNNNNNNNNNNNNNNNNNNNNNNNNNNNNNNNNNNNNNNNNNNNNNNNNNNNNNNNNNNNNNNNNNNNNNNNNNNNNNNNNNNNNNNNNNNNNNNNNNNNNNNNNNNNNNNNNNNNNNNNNNNNNNNNNNNNNNNNNNNNNNNNNNNNNNNNNNNNNNNNNNNNNNNNNNNNNNNNNNNNNNNNNNNNNNNNNNNNNNNNNNNNNNNNNNNNNNNNNNNNNNNNNNNNNNNNNNNNNNNNN…
171	ADOR3B19748	NA	NA	NA	NA	NA	NA	NA	NA	NA	NA	NA	NA	NA	NA	NA	NA	NA	NA	NA	NA	NA	NA	NA	NA	NA	NA	NA	NA	NA	NA	NA	NA	NA	NA	NA	NA	NA	NA	NA	1	NA	NA	NA	NA	NA	NA	ATGACCGTGGCTCGTCGACCTAGACGCATACGCAAGGTCATGCGGCCACTGCTCCAATGGTATTATAACCTCAACCTTCTTCTTCTTCTTCTTCTTCTTCTCCTCCTCCTTCTTCTTCTACTCCTCCTCGTCCCCTCTGAAACACGGTCGCTTCCCCCCTTCCGCGCGCTCGCCGCCCTCCCTCCTCTCCCCCCTCCCCTCTCTGTCCTACGCTCGCGCTCGAATCGCTCGTTCGCATGTGCGAACGCGCCCTAA
172	ADOR3B19824	NA	NA	NA	NA	NA	NA	NA	NA	NA	NA	NA	NA	NA	NA	NA	NA	NA	NA	NA	NA	NA	NA	NA	NA	NA	NA	NA	NA	NA	NA	NA	NA	NA	NA	NA	NA	NA	NA	NA	1	NA	NA	NA	NA	NA	NA	ATGATTCGGACGAACGGCCACGGAGCCGTTCCAACTCAAAAGAGGATNNNNNNNNNNNNNNNNNNNNNNNNNNNNNNNNNNNNNNNNNNNNNNNNNNNNNNNNNNNNNNNNNNNNNNNNNNNNNNNNNNNNNNNNNNNNNNNNNNNNNNNNNNNNNNNNNNNNNNNNNNNNNNNNNNNNNNNNNNNNNNNNNNNNNNNNNNNNNNNNNNNNNNNNNNNNNNNNNNNNNNNNNNNNNNNNNNNNNNNNNNNNNNNNNNNNNNNNNNNNNNNNNNNNNNNNNNNNNNNNNNNNNNNNNNNNNNNNNNNNNNNNNNNNNNNNNNTTACGTAATGAAACGTTTAATTATATAGGGAAATTCTCTTTTCGCGCGTGCAAATTTTTAGAAAGGAGGCTATACAGA…
173	ADOR3B19927	NA	NA	NA	NA	NA	NA	NA	NA	NA	NA	NA	NA	NA	NA	NA	NA	NA	NA	NA	NA	NA	NA	NA	NA	NA	NA	NA	NA	NA	NA	NA	NA	NA	NA	NA	NA	NA	NA	NA	1	NA	NA	NA	NA	NA	NA	AATCTTGGTTCCCAAGAAATTAATCACGGTACAACTGGAACTGCACTCGACGACAAGTGGGGCAATAGTTGTAACAGACTT
174	ADOR3B19974	NA	NA	NA	NA	NA	NA	NA	NA	NA	NA	NA	NA	NA	NA	NA	NA	NA	NA	NA	NA	NA	NA	NA	NA	NA	NA	NA	NA	NA	NA	NA	NA	NA	NA	NA	NA	NA	NA	NA	1	NA	NA	NA	NA	NA	NA	ATGGTCGAAAGGAATCTTTCCGATGGAGGAGAGCGTGTAAGTCGTTGGTCCGNNNNNNNNNNNNNNNNNNNNNNNNNNNNNNNNNNNNNNNNNNNNNNNNNNNNNNNNNNNNNNNNNNNNNNNNNNNNNNNNNNNNNNNNNNNNNNNNNNNNNNNNNNNNNNNNNNNNNNNNNNNNNNNNNNNNNNNNNNNNNNNNNNNNNNNNNNNNNNNNNNNNNNNNNNNNNNNNNNNNNNNNNNNNNNNNNNNNNNNNNNNNNNNNNNNNNNNNNNNNNNNNNNNNNNNNNNNNNNNNNNNNNNNNNNNNNNNNNNNNNNNNNNNNNNNNNNNNNNNNNNNNNNNNNNNNNNNNNNNNNNNNNNNNNNNNNNNNNNNNNNNNNNNNNNNNNNNNNNNNNNNNNNN…
175	ADOR3B20008	NA	NA	NA	NA	NA	NA	NA	NA	NA	NA	NA	NA	NA	NA	NA	NA	NA	NA	NA	NA	NA	NA	NA	NA	NA	NA	NA	NA	NA	NA	NA	NA	NA	NA	NA	NA	NA	NA	NA	1	NA	NA	NA	NA	NA	NA	ATGGAAAGACACATGGGACTTTATTATACATAA
176	ADOR3B20103	NA	NA	NA	NA	NA	NA	NA	NA	NA	NA	NA	NA	NA	NA	NA	NA	NA	NA	NA	NA	NA	NA	NA	NA	NA	NA	NA	NA	NA	NA	NA	NA	NA	NA	NA	NA	NA	NA	NA	2	NA	NA	NA	NA	NA	NA	CAGAGCATTTGA
177	ADOR3B20201	NA	NA	NA	NA	NA	NA	NA	NA	NA	NA	NA	NA	NA	NA	NA	NA	NA	NA	NA	NA	NA	NA	NA	NA	NA	NA	NA	NA	NA	NA	NA	NA	NA	NA	NA	NA	NA	NA	NA	1	NA	NA	NA	NA	NA	NA	GTTGCGGAGTGTTGGTGGCGAGTCCAGGTGGCACGGACGAAGGTCGAAATGGAATTCCCTTTGAATTGGTCGACGACAGGACGCGTTATGCGCCAATTATGCGCCACTCTATGGATT
178	ADOR3B20513	NA	NA	NA	NA	NA	NA	NA	NA	NA	NA	NA	NA	NA	NA	NA	NA	NA	NA	NA	NA	NA	NA	NA	NA	NA	NA	NA	NA	NA	NA	NA	NA	NA	NA	NA	NA	NA	NA	NA	1	NA	NA	NA	NA	NA	NA	ATGATTTATAGAAACTTAAATCCCCGGGGCTCTCGTCTCACCTCTTCTTCGTCTGGCATTGCNNNNNNNNNNNNNNNNNNNNNNNNNNNNNNNNNNNNNNNNNNNNNNNNNNNNNNNNNNNNNNNNNNNNNNNNNNNNNNNNNNNNNNNNNNNNNNNNNNNNNNNNNNNNNNNNNNNNNNNNNNNNNNNNNNNNNNNNNNNNNNNNNNNNNNNNNNNNNNNNNNNNNNNNNNNNNNNNNNNNNNNNNNNNNNNNNNNNNNNNNNNNNNNNNNNNNNNNNNNNNNNNNNNNNNNNNNNNNNNNNNNNNNNNNNNNNNNNNNNNNNNNNNNNNNNNNNNNNNNNNNNNNNNNNNNNNNNNNNNNNNNNNNNNNNNNNNNNNNNNNNNNNNNNNNNNNNNNN…
179	ADOR3B20765	NA	NA	NA	NA	NA	NA	NA	NA	NA	NA	NA	NA	NA	NA	NA	NA	NA	NA	NA	NA	NA	NA	NA	NA	NA	NA	NA	NA	NA	NA	NA	NA	NA	NA	NA	NA	NA	NA	NA	1	NA	NA	NA	NA	NA	NA	CTTACGTCCCCGAGTAGTATAAATGCTTTATGGTCAGCCAACCGTGTACCACCAACCGTTGTCAGCAGATCTTGCGTAGCTCAGAGTGATATATACGATATTTTAGAAAACGAATTAGCATATGCCAGATATGCAGGAACGTCTACATCAACACAGAATTCCTCTAACCTTTCATATCATGGAATGAATCCTGAAACCATGACCTCGATTGTTCTCATCTGA
180	ADOR3B20809	NA	NA	NA	NA	NA	NA	NA	NA	NA	NA	NA	NA	NA	NA	NA	NA	NA	NA	NA	NA	NA	NA	NA	NA	NA	NA	NA	NA	NA	NA	NA	NA	NA	NA	NA	NA	NA	NA	NA	1	NA	NA	NA	NA	NA	NA	AACTGCAGAATTTGCAATTGGACAATTTAA
181	ADOR3B20922	NA	NA	NA	NA	NA	NA	NA	NA	NA	NA	NA	NA	NA	NA	NA	NA	NA	NA	NA	NA	NA	NA	NA	NA	NA	NA	NA	NA	NA	NA	NA	NA	NA	NA	NA	NA	NA	NA	NA	1	NA	NA	NA	NA	NA	NA	ATGTCCGTTCAACGATTCTCTCCTCTGGCATCGCTCGTCGATCGATACACGATCGGTAAGTACGCGTCCTGTTTTCCTCTCTTTCCTTGGTTTTCGTTTTGTTTCATTTCATTTTGTAATTTTTTTTTTCTTTTTCTTTTTTTTTCTTTTTTTTTTCGTAAGGCAAGAGCAGAAAACAAAATCAAAGATAAAGATAAAAAATTTCGCGAATACCGGTATNNNNNNNNNNNNNNNNNNNNNNNNNNNNNNNNNNNNNNNNNNNNNNNNNNNNNNNNNNNNNNNNNNNNNNNNNNNNNNNNNNNNNNNNNNNNNNNNNNNNNNNNNNNNNNNNNNNNNNNNNNNNNNNNNNNNNNNNNNNNNNNNNNNNNNNNNNNNNNNNNNNNNNNNNNNNNNNNNNNN…
182	ADOR3B20997	NA	NA	NA	NA	NA	NA	NA	NA	NA	NA	NA	NA	NA	NA	NA	NA	NA	NA	NA	NA	NA	NA	NA	NA	NA	NA	NA	NA	NA	NA	NA	NA	NA	NA	NA	NA	NA	NA	NA	1	NA	NA	NA	NA	NA	NA	ATGGAGATCGAAAGATCTCCCNNNNNNNNNNNNNNNNNNNNNNNNNNNNNNNNNNNNNNNNNNNNNNNNNNNNNNNNNNNNNNNNNNNNNNNNNNNNNNNNNNNNNNNNNNNNNNNNNNNNNNNNNNNNNNNNNNNNNNNNNNNNNNNNNNNNNNNNNNNNNNNNNNNNNNNNNNNNNNNNNNNNNNNNNNNNNNNNNNNNNNNNNNNNNNNNNNNNNNNNNNNNNNNNNNNNNNNNNNNNNNNNNNNNNNNNNNNNNNNNNNNNNNNNNNNNNNNNNNNNNNNNNNNNNNNNNNNNNNNNNNNNNNNNNNNNNNNNNNNNNNNNNNNNNNNNNNNNNNNNNNNNNNNNNNNNNNNNNNNNNNNNNNNCACCTCTCTTTCCCTCTCTCTCTCTCTCTCT…
183	ADOR3B21175	NA	NA	NA	NA	NA	NA	NA	NA	NA	NA	NA	NA	NA	NA	NA	NA	NA	NA	NA	NA	NA	NA	NA	NA	NA	NA	NA	NA	NA	NA	NA	NA	NA	NA	NA	NA	NA	NA	NA	1	NA	NA	NA	NA	NA	NA	GTGGTATTTCACGAGCAATCGTTTTGGTATTTGATATGGTTGTTGTAG
184	ADOR3B21374	NA	NA	NA	NA	NA	NA	NA	NA	NA	NA	NA	NA	NA	NA	NA	NA	NA	NA	NA	NA	NA	NA	NA	NA	NA	NA	NA	NA	NA	NA	NA	NA	NA	NA	NA	NA	NA	NA	NA	1	NA	NA	NA	NA	NA	NA	ATGTACGAGCTCGCCACGGGTTTCTACGTGAAATTTCAG
185	ADOR3B21392	NA	NA	NA	NA	NA	NA	NA	NA	NA	NA	NA	NA	NA	NA	NA	NA	NA	NA	NA	NA	NA	NA	NA	NA	NA	NA	NA	NA	NA	NA	NA	NA	NA	NA	NA	NA	NA	Y	NA	1	NA	NA	NA	NA	NA	NA	ATGGGCTCCCACACGTCCGGCTCAAGCCAGCGAGTTAAAAGACTTTTAAGCTTGTCCAACAGTGATTTACGATGCTCGTTCCAAGCCTACGACGACGAGCACGGGATGGCCGCTTGGCTGGACGGTTCTCGCGCCCAACGCGAGGGCGGCCGATCCTTTCCAGGGGACATTCTCACCGGGGAGAAGGAATCATCTCGTCCCTGA
186	ADOR3B21563	NA	NA	NA	NA	NA	NA	NA	NA	NA	NA	NA	NA	NA	NA	NA	NA	NA	NA	NA	NA	NA	NA	NA	NA	NA	NA	NA	NA	NA	NA	NA	NA	NA	NA	NA	NA	NA	NA	NA	1	NA	NA	NA	NA	NA	NA	ATGTCATTAGAAAAAGGTGATATCATTGATATCATTGATAGTAAAGAATCGAATGCAAATGCTTCGCCAAATTCGTTA
187	ADOR3B21582	NA	NA	NA	NA	NA	NA	NA	NA	NA	NA	NA	NA	NA	NA	NA	NA	NA	NA	NA	NA	NA	NA	NA	NA	NA	NA	NA	NA	NA	NA	NA	NA	NA	NA	NA	NA	NA	NA	NA	2	NA	NA	NA	NA	NA	NA	ATGGCTGGACAATACTTGCTGGCCTTAGGAGTGCAAAGGCCGGCGTACACTCGGGTACTTTCACATTCGCACGTGACGAGCCGAGTCGTCGAGATAAGACAGAGTCTGACAATGAGCGTGCCTCGTATCGATTTAACACCAAGCGTAAAGATCCCCAATCTGAACAGTCGCCAGGTATCTTTATCCCGGGGTTTAGTAGATTTCTCGAGTGGCGAGATGCTCTCGGATACTATTCTCAGCGCGGCTGCGAGCTAA
188	ADOR3B21612	NA	NA	NA	NA	NA	NA	NA	NA	NA	NA	NA	NA	NA	NA	NA	NA	NA	NA	NA	NA	NA	NA	NA	NA	NA	NA	NA	NA	NA	NA	NA	NA	NA	NA	NA	NA	NA	NA	NA	1	NA	NA	NA	NA	NA	NA	ATGAATGCAGAACCAGAAGTTTGCATGATTGGCAAATTTAATGAAGGATTCTGTAATTTA
189	ADOR3B21618	NA	NA	NA	NA	NA	NA	NA	NA	NA	NA	NA	NA	NA	NA	NA	NA	NA	NA	NA	NA	NA	NA	NA	NA	NA	NA	NA	NA	NA	NA	NA	NA	NA	NA	NA	NA	NA	NA	NA	1	NA	NA	NA	NA	NA	NA	ATGAAATTAACGACCGTTCGTAATTGGAATTACGAATCGGAATGGAACGGTGTACAATGGTTGGACCCGGGCGAAATTAAAATTTTGCCGGTCGCCATTTTGGGCGATCGGCGGGATCGAATTGGGTCGGTCGGCCGGGCTGGATTTCAGGCCTGGGATTTCACTGTCAGATTCAACGGCCGTCAGATTGATAGACTCAGGTCGAATGTTAGGGATATGGGGTAA
190	ADOR3B21652	NA	NA	NA	NA	NA	NA	NA	NA	NA	NA	NA	NA	NA	NA	NA	NA	NA	NA	NA	NA	NA	NA	NA	NA	NA	NA	NA	NA	NA	NA	NA	NA	NA	NA	NA	NA	NA	NA	NA	1	NA	NA	NA	NA	NA	NA	GGAATCGTTGGATTAAACAGAGGAAGGCTTCTCGCAAGGTTAGAATCCACGGAGAATTCCAAGTCGCGATTGAAATTTGTCGCGAAACTCCACCACGTGAACGTGCTCCCGCAATGTAGTGTAGGCTATGGTCGTCATGGTTGA
191	ADOR3B21763	NA	NA	NA	NA	NA	NA	NA	NA	NA	NA	NA	NA	NA	NA	NA	NA	NA	NA	NA	NA	NA	NA	NA	NA	NA	NA	NA	NA	NA	NA	NA	NA	NA	NA	NA	NA	NA	NA	NA	1	NA	NA	NA	NA	NA	NA	ATGGGCTACTTTTTAGAACTATCACGGATGTTGTACCGTGGGCAGAGCTCTAGCGCT
192	ADOR3B21774	NA	NA	NA	NA	NA	NA	NA	NA	NA	NA	NA	NA	NA	NA	NA	NA	NA	NA	NA	NA	NA	NA	NA	NA	NA	NA	NA	NA	NA	NA	NA	NA	NA	NA	NA	NA	NA	NA	NA	1	NA	NA	NA	NA	NA	NA	ATGCACGTGGTAAGTACAAGTATGTCAAGGCGCGACCTGAATTTTCCTACTCTTAGTGCCCCCTACCGTACNNNNNNNNNNNNNNNNNNNNNNNNNNNNNNNNNNNNNNNNNNNNNNNNNNNNNNNNNNNNNNNNNNNNNNNNNNNNNNNNNNNNNNNNNNNNNNNNNNNNNNNNNNNNNNNNNNNNNNNNNNNNNNNNNNNNNNNNNNNNNNNNNNNNNNNNNNNNNNNNNNNNNNNNNNNNNNNNNNNNNNNNNNNNNNNNNNNNNNNNNNNNNNNNNNNNNNNNNNNNNNNNNNNNNNNNNNNNNNNNNNNNNNNNNNNNNNNNNNNNNNNNNNNNNNNNNNNNNNNNNNNNNNNNNNNNNNNNNNNNNNNNNNNNNNNNNNNNNNNNNNNNNNNN…
193	ADOR3B21787	NA	NA	NA	NA	NA	NA	NA	NA	NA	NA	NA	NA	NA	NA	NA	NA	NA	NA	NA	NA	NA	NA	NA	NA	NA	NA	NA	NA	NA	NA	NA	NA	NA	NA	NA	NA	NA	NA	NA	1	NA	NA	NA	NA	NA	NA	ATGGTAGTGGAGGGNNNNNNNNNNNNNNNNNNNNNNNNNNNNNNNNNNNNNNNNNNNNNNNNNNNNNNNNNNNNNNNNNNNNNNNNNNNNNNNNNNNNNNNNNNNNNNNNNNNNNNNNNNNNNNNNNNNNNNNNNNNNNNNNNNNNNNNNNNNNNNNNNNNNNNNNNNNNNNNNNNNNNNNNNNNNNNNNNNNNNNNNNNNNNNNNNNNNNNNNNNNNNNNNNNNNNNNNNNNNNNNNNNNNNNNNNNNNNNNNNNNNNNNNNNNNNNNNNNNNNNNNNNNNNNNNNNNNNNNNNNNNNNNNNNNNNNNNNNNNNNNNNNNNNNNNNNNNNNNNNNNNNNNNNNNNNNNNNNNNNNNNNNNNNNNNNNNNNNNNNNNNNNNNNNNNNNNNNNNNNNNNN…
194	ADOR3B21920	NA	NA	NA	NA	NA	NA	NA	NA	NA	NA	NA	NA	NA	NA	NA	NA	NA	NA	NA	NA	NA	NA	NA	NA	NA	NA	NA	NA	NA	NA	NA	NA	NA	NA	NA	NA	NA	NA	NA	1	NA	NA	NA	NA	NA	NA	ATGCAAGTGGATTCTGCCACGTATATATATATATATATNNNNNNNNNNNNNNNNNNNNNNNNNNNNNNNNNNNNNNNNNNNNNNNNNNNNNNNNNNNNNNNNNNNNNNNNNNNNNNNNNNNNNNNNNNNNNNNNNNNNNNNNNNNNNNNNNNNNNNNNNNNNNNNNNNNNNNNNNNNNNNNNNNNNNNNNNNNNNNNNNNNNNNNNNNNNNNNNNNNNNNNNNNNNNNNNNNNNNNNNNNNNNGTGGAATCAGACGCGAAAAAAGAAAAAGCGAGTGGTGCACAGCGTGCACGTGTTTCCTGA
195	ADOR3B21966	NA	NA	NA	NA	NA	NA	NA	NA	NA	NA	NA	NA	NA	NA	NA	NA	NA	NA	NA	NA	NA	NA	NA	NA	NA	NA	NA	NA	NA	NA	NA	NA	NA	NA	NA	NA	NA	NA	NA	1	NA	NA	NA	NA	NA	NA	ATGGAAATTGCTGTTTCACCGCTGTCCCTCGCTCTTCTTTTTTTTTTTTTTTTTTTTTNNNNNNNNNNNNNNNNNNNNNNNNNNNNNNNNNNNNNNNNNNNNNNNNNNNNNNNNNNNNNNNNNNNNNNNNNNNNNNNNNNNNNNNNNNNNNNNNNNNNNNNNNNNNNNNNNNNNNNNNNNNNNNNNNNNNNNNNNNNNNNNNNNNNNNNNNNNNNNNNNNNNNNNNNNNNTCCCCTCATTGTTTCAACCGTTCGCCATTGGATATCGTGGTAA
196	ADOR3B22262	NA	NA	NA	NA	NA	NA	NA	NA	NA	NA	NA	NA	NA	NA	NA	NA	NA	NA	NA	NA	NA	NA	NA	NA	NA	NA	NA	NA	NA	NA	NA	NA	NA	NA	NA	NA	NA	NA	NA	3	NA	NA	NA	NA	NA	NA	ATGCCATTGCTAGAATGCAACGCGGCGTTCGCCTCGTGCAAGCCTTACTCGTTCCATGCCGTGGCCGGAGTAGATAGCTGGTCGACTGCTGGCCTGGCCGCAACAAAGACTTCCTTCCTTGACTGGGCTGGCTGGCTGCCTCCTTGCGAGAGCAATTATTACGGCATCGCGGGAACGCGTCCATACATTATAGGTAAATATGCCCTGATTTACTGGACGAGAACTAACCAGACCAGAATCAGATATGGCTTGCACCTATTTCACAGAGAATTCGGCAAAGTGATGCGATATAAAAATGTATATAAGTTAGAGTTCATAGATGATTCCAGAGGATTCCAGAGGAATGGCCTATGGCTTCTACCTAGACACGCCTATCTGATCGGCAATGCTCCCATCGTA…
197	ADOR3B22363	NA	NA	NA	NA	NA	NA	NA	NA	NA	NA	NA	NA	NA	NA	NA	NA	NA	NA	NA	NA	NA	NA	NA	NA	NA	NA	NA	NA	NA	NA	NA	NA	NA	NA	NA	NA	NA	NA	NA	1	NA	NA	NA	NA	NA	NA	ATAATGAATACTTCCATACTTCTACTTTATTAG
198	ADOR3B80002	NA	NA	NA	NA	NA	NA	NA	NA	NA	NA	NA	NA	NA	NA	NA	NA	NA	NA	NA	NA	NA	NA	NA	NA	NA	NA	NA	NA	NA	NA	NA	NA	NA	NA	NA	NA	NA	NA	NA	3	NA	NA	NA	NA	NA	NA	ATGGCAACAGTAACGTTAAGAGGCGAGGAAACAATCGGCTGGATCGGCCGGCGTGCTAAGAACGAGGTAAACTTCTCTGGTGATCCATCTTTCGTCGTCCAATTGAAGATTCATAGGCTTGTTTCACTTCTTGATCACTATTATACCAACAAGTTTGAAGAATTATTATTTTCACCATCCCGATGCTGTTCTGGTGTGCCAAGGTAG
199	ADOR3B80009	NA	NA	NA	NA	NA	NA	NA	NA	NA	NA	NA	NA	NA	NA	NA	NA	NA	NA	NA	NA	NA	NA	NA	NA	NA	NA	NA	NA	NA	NA	NA	NA	NA	NA	NA	NA	NA	NA	NA	1	NA	NA	NA	NA	NA	NA	ATGGAAACCACCACGAACCTTCCTAATTGTTGGTTGGTAAAAGTTGAATTTACCGAAGATCGTGGGAAAATAAAAGATGGCTTGGAAACTGGATGTTTTTACTGGAATTTAACGGTATCGTACACCGTGGTATCGTGTGAATATAAATGGATGGCTAGATTCCATTATCCGAATATCCTAATCGAATATTCTATTATTCGAACTCGTAACAATGAAAACCTTATCGGAGCAATGGAAATGGAATTTGATCCAACAACAAATAACGCCAAAATCGAAGATACTGACGAAATTAGAAGTACAAAATTGGCAAAAATATCCACAGATTATGATAAGATTATGATAAATCCACAAATCGTTGGCGTTAAAAAAGAACGAACGAAAGAATTATTTAACAATTAT…
200	ADOR3B80022	NA	NA	NA	NA	NA	NA	NA	NA	NA	NA	NA	NA	NA	NA	NA	NA	NA	NA	NA	NA	NA	NA	NA	NA	NA	NA	NA	NA	NA	NA	NA	NA	NA	NA	NA	NA	NA	NA	NA	1	NA	NA	NA	NA	NA	NA	ATGAAAGGCGTTTCCGTAGTGATGTTAACTTCTATTATTGGTGTAGTCACTGTAGTAGTGGTAGTGGGAGTTATTTCCGTCGTTTCTGTTGTTTGTGTTGTTACAGTAGTTATAGGAGTAGTCACTGTTGTAACAATTTCAGTTGTGGTTTCCGTTGTTAAAATAATAATGAACGGTGTTTCTGTAGTG
201	ADOR3B80029	NA	NA	NA	NA	NA	NA	NA	NA	NA	NA	NA	NA	NA	NA	NA	NA	NA	NA	NA	NA	NA	NA	NA	NA	NA	NA	NA	NA	NA	NA	NA	NA	NA	NA	NA	NA	NA	NA	NA	1	NA	NA	NA	NA	NA	NA	TGGCGTCGCACTATCAATATTGTATCGCGAAATATTTTGTCCATAACATTAAATGAAGAATATCCATGGCATTGCACTATCAATATGGAATATTTAATCCAAACCGCTACCAAAGTTGCATCGCACATGGTATCGCAAAAGATATTGCATCGCGGAATATTTGAAAATGGCGTCACACTATCAATACCGCGAAATATCGCCGGTGTTAAATGA
202	ADOR3B80030	NA	NA	NA	NA	NA	NA	NA	NA	NA	NA	NA	NA	NA	NA	NA	NA	NA	NA	NA	NA	NA	NA	NA	NA	NA	NA	NA	NA	NA	NA	NA	NA	NA	NA	NA	NA	NA	NA	NA	1	NA	NA	NA	NA	NA	NA	TTCCAGGTGTGCCAGGAGTTCCAGGTGTGCCAGAAGTTCCAGGTGTACCGGAACTTCCAGGTGTGGCAGAACTTTCTGATGTGCCAGAAGTTCCAGGCATGCCAGAAGTACCAGAAGTTCCAGGTGTGCCAGGAATGTCAGATGTGCCAGAACTTCCAGATGTGCCAGGAGTTCCAGGTGTACTGGGACTTCCAGATGTGCCAGGAATGTTAGATATGCCAGGACTTGCAGGCGTGCCAGAAGTTCCTGGTATGCCAGGAGTTCCAGATGTTCCGGGATTTCCAG
203	ADOR3B80040	NA	NA	NA	NA	NA	NA	NA	NA	NA	NA	NA	NA	NA	NA	NA	NA	NA	NA	NA	NA	NA	NA	NA	NA	NA	NA	NA	NA	NA	NA	NA	NA	NA	NA	NA	NA	NA	NA	NA	1	NA	NA	NA	NA	NA	NA	ATGAACGGTGTTTCTGTAGTGGTAGTTGTAACCTCTATTGTTGGTGTAATTATTGTAGTGGGAGTAATAGGAGTTGGTTCTGTTGTTATAGTAGTAACTGGAGTGGTCACTGTCGTGAGAATTGTAGTCTCAGTTGTGGTTTCTGTTGTTAACGTGGTAATGAAAGGCGTTTCCGTAGTTGTGTTAATAACTTCTATTATTGGTGTAGTCACTGTAGTC
204	ADOR3B80042	NA	NA	NA	NA	NA	NA	NA	NA	NA	NA	NA	NA	NA	NA	NA	NA	NA	NA	NA	NA	NA	NA	NA	NA	NA	NA	NA	NA	NA	NA	NA	NA	NA	NA	NA	NA	NA	NA	NA	1	NA	NA	NA	NA	NA	NA	ATGACGAAACATCGAACAAATAATCGACGCTCGGGAAGAAGATCGAGTTGCTCGATGATCCAAGCTCGAGAGATTTTGCGCGCTATATCGATTATCCGCACCATAAGTCGCTCACGATTGAATCCAATTAAATCTCGAAAAATTCCTCCAAGTTAA
205	ADOR3B80045	NA	NA	NA	NA	NA	NA	NA	NA	NA	NA	NA	NA	NA	NA	NA	NA	NA	NA	NA	NA	NA	NA	NA	NA	NA	NA	NA	NA	NA	NA	NA	NA	NA	NA	NA	NA	NA	NA	NA	1	NA	NA	NA	NA	NA	NA	AGCAGTTTTGAAACACTCTTTTTGTGGAATCTGCAAGTGGATATTTGGATAGCTTGGAGGATTTCGTTGGAAGCGGGAATTCAAATAAAAGGTAGACAGCAGCATTCTCAGAAATTTCTTTCTGATGTCTGCATTCAACTCATAGAGTTGAAGATTCCCTTTCATAGAGCAGGTTTGAAACACTCTTTCTGGAGTATCTGGATGTGGACATTTGGAGCGCTTTGA
206	ADOR3B80050	NA	NA	NA	NA	NA	NA	NA	NA	NA	NA	NA	NA	NA	NA	NA	NA	NA	NA	NA	NA	NA	NA	NA	NA	NA	NA	NA	NA	NA	NA	NA	NA	NA	NA	NA	NA	NA	NA	NA	1	NA	NA	NA	NA	NA	NA	ATGCCCACTCCGAATTCGACTCCTCCTCGACGAATCGTTTATCGTTCTCGGCAAGTTGCGCGTCCGATCTTCCCTGGTGTTGGTGGTGGTGATGGTGTTGGTGGAGTCGTTTCGATCGTTGTTGGTCGGTTGTCGGCCGGGACGTTGGGAGGACGTCGTGAACCGGCAATTTGTAATCTGTGGTAG
207	ADOR3B80055	NA	NA	NA	NA	NA	NA	NA	NA	NA	NA	NA	NA	NA	NA	NA	NA	NA	NA	NA	NA	NA	NA	NA	NA	NA	NA	NA	NA	NA	NA	NA	NA	NA	NA	NA	NA	NA	NA	NA	1	NA	NA	NA	NA	NA	NA	ATGAGGACCTTAGGATTTTACAATTACGTTATTTATTTTATAATATTTTTGGTTACAGTGACTACCATCATCAGTCTTACTGATAGCGGGAGCGTTGCCGTTATCGCCAACGTCCTTGTCAATGACAGATTTGCTATCAGGGCGAGCGTACCGTCGCAGCAAATGCATCGTCAATGTAGC
208	ADOR3B80064	NA	NA	NA	NA	NA	NA	NA	NA	NA	NA	NA	NA	NA	NA	NA	NA	NA	NA	NA	NA	NA	NA	NA	NA	NA	NA	NA	NA	NA	NA	NA	NA	NA	NA	NA	NA	NA	NA	NA	1	NA	NA	NA	NA	NA	NA	ATGGTTGTTAATGTGGTTGTTGTTTCCGGCGATGTTGTCGTAGTGAACGTTGTTTCTTCAGTTGTTGTAGTAACTACAGTAGTTGTGGTAGTTGGAACGGTTGGACTTTCAGTTGTAGTTTCTGGCGTAGTTGATGTGGTAGTAATTGTTGTTGTAGTTGTTTCTGGCGACGTTGTTGTAATTACTGTTGTTTTTTCAGTTGTAGTAGGGGTTACA
209	ADOR3B80082	NA	NA	NA	NA	NA	NA	NA	NA	NA	NA	NA	NA	NA	NA	NA	NA	NA	NA	NA	NA	NA	NA	NA	NA	NA	NA	NA	NA	NA	NA	NA	NA	NA	NA	NA	NA	NA	NA	NA	1	NA	NA	NA	NA	NA	NA	ATGAAAGAGTCGAAAGCTTTATGGATTCTTTCGACTTATGGTTTAGTTGGTTCGGATTTAGGAGTGAAAATGAAGTATGGTTATGGAGAATTGGATTGGTGGAAGTTAAAAGAAAAAGAGATTTTAGTTTTTTTCTTCTTTGTGAGGCTCTCTACGTGA
210	ADOR3B80086	NA	NA	NA	NA	NA	NA	NA	NA	NA	NA	NA	NA	NA	NA	NA	NA	NA	NA	NA	NA	NA	NA	NA	NA	NA	NA	NA	NA	NA	NA	NA	NA	NA	NA	NA	NA	NA	NA	NA	1	NA	NA	NA	NA	NA	NA	ATGTCGATGTCTAACATAATAATTAGTAAGATAGTTCTCAGTGATAATCTCGTCGAGGCCAATACGAGCTACCATGATACGAATTCGTTTAGATTATTAGAATTAAAATTAGACGGCACGCGATCGGATTTCCAAGACCAAGAATTTCTTCAAAACCAAGTCGCCTTATACTTTAAACGCAATCCTTTCACAGAATCTTCTTATTCTTCTTCCTTGTCAAAAATCGGCCGAAGATTGTAG
211	ADOR3B80090	NA	NA	NA	NA	NA	NA	NA	NA	NA	NA	NA	NA	NA	NA	NA	NA	NA	NA	NA	NA	NA	NA	NA	NA	NA	NA	NA	NA	NA	NA	NA	NA	NA	NA	NA	NA	NA	NA	NA	1	NA	NA	NA	NA	NA	NA	CCACCTGGTTATAATTATCCATCTCCTCCGCGAACTCCAGCACCACCTCCCCCTTATCCACCATCGCAGCCACGACCACCTTCACCTCCTTCTCCTTCTCGGCCACCAAGTTTTCCACCTGATATAACATCGGGAACACCACCGTTTCAGCATATCCCGCCAAAACCTTTACCATCTTCTACATCACCAAAAACTCCATTTCCATATCCATCAAAACCTCTTCCATCTAGACCACCACAGCCACCTTCACCACCTGGATATTTATCGCCAGCACCATCTGGACCACCACCAATAACACGACCGCCCTTATCTTATCTACCTCCTTCACCACCAATAAGTCGTCCACCACCATCACCACCACCTTAT
212	ADOR3B80091	NA	NA	NA	NA	NA	NA	NA	NA	NA	NA	NA	NA	NA	NA	NA	NA	NA	NA	NA	NA	NA	NA	NA	NA	NA	NA	NA	NA	NA	NA	NA	NA	NA	NA	NA	NA	NA	NA	NA	1	NA	NA	NA	NA	NA	NA	ATGCAATTAAGGATAATAACCTTGAATCGGACGAGTTTTAATTTTGATGCAAGAAATATTTTTAAAACAAATTTAGAATTGAAAATACACGAGAGAAAAGGAAAATATGTGAGTATAGACATCGGAAATACCAATGGAATACGTAGTGGAAGAGACAAAGAGATTACTAGTGATCATTAA
213	ADOR3B80093	NA	NA	NA	NA	NA	NA	NA	NA	NA	NA	NA	NA	NA	NA	NA	NA	NA	NA	NA	NA	NA	NA	NA	NA	NA	NA	NA	NA	NA	NA	NA	NA	NA	NA	NA	NA	NA	NA	NA	1	NA	NA	NA	NA	NA	NA	ATAGATAAGAAAAGTGGTTGCAGTTCAAGAAAACTCGAAAGATACAACATAGTATCGGTGTCGGGTCATTTTCATTCTGCCGAAAAAGAATTATCCATCCTTCGTACGTCTAGAAACGGTTGGTTTATTTATCGTTTATGTATCGGTTGA
214	ADOR3B80100	NA	NA	NA	NA	NA	NA	NA	NA	NA	NA	NA	NA	NA	NA	NA	NA	NA	NA	NA	NA	NA	NA	NA	NA	NA	NA	NA	NA	NA	NA	NA	NA	NA	NA	NA	NA	NA	NA	NA	1	NA	NA	NA	NA	NA	NA	AAACTACAACTACACCAAGAACTACTACCACAACACCTACGCCAGAAACTACAACGGAAAGCACAACTCCGCCAACAACTACAACTACAGTAATTCCTACCACAACTGAAGAAACGATTGTAACCACGACAACATCGCCAGAAACAACTACAACAACGACAATTACAACAACACCTGTGACAGAAACTACAACAGAAAGTCCAACTGTTCCACTTACTACAACTACTAAAATTCCTACCACAACTGAAGAAACAACAGTAACTACGACAACGTCTCCAGAAACAACAACTACACCAACAACTATTACTACAACTACAGCAAAAATTACTACTACAACATCTACGCCAGAAACTACAACGGAAAGTACAACTATGCCACCCACTACAACTAGTATAGCTC…
215	ADOR3B80101	NA	NA	NA	NA	NA	NA	NA	NA	NA	NA	NA	NA	NA	NA	NA	NA	NA	NA	NA	NA	NA	NA	NA	NA	NA	NA	NA	NA	NA	NA	NA	NA	NA	NA	NA	NA	NA	NA	NA	1	NA	NA	NA	NA	NA	NA	ATGCCAATTATCGTAACTGAAATAACGGAAACTACTTTCCATATTATCGAAATCGTGAATATAACAACAGAAACACCAATTGTCACGACAGAAATAATTGAGGTTACAACGTATCCAGTTGTTACAACAACACCATTTATTGTGACAACCGAAACAACTTTTTTTGTCATCATGGATATTACCACTCCTCCTATTGAAGTTATAAAT
216	ADOR3B80102	NA	NA	NA	NA	NA	NA	NA	NA	NA	NA	NA	NA	NA	NA	NA	NA	NA	NA	NA	NA	NA	NA	NA	NA	NA	NA	NA	NA	NA	NA	NA	NA	NA	NA	NA	NA	NA	NA	NA	1	NA	NA	NA	NA	NA	NA	AAACTACAACGGAAAGTCCAACTCCGCCGACCACTACGACTACTGAAGAAACAACTTTCACTACGACAACATCGCCGGAAACAACAACCATACCAACAACTATTACCACAACATCTACGCCAGAAACTACTACGGAAAGTCCAACTCCGCCACCTACTACAACTACTGTAGTTCCTATTATAACTGAAGAAACAACTGTGACCACGACAACATCGCCGGAAACAACTACACCAACAACTATTACCACTACATCTACGCCAGAAACTACTACGGAAAGTCCAACTCTGCCAACTACTACAACTACTGTAGTTCCCACCACAACTGAAGAAACAACTGTAACTACGACAATATCGCCGGAAACAACAATTACACCAACAACTACTACAACACTTACGCCAG…
217	ADOR3B80113	NA	NA	NA	NA	NA	NA	NA	NA	NA	NA	NA	NA	NA	NA	NA	NA	NA	NA	NA	NA	NA	NA	NA	NA	NA	NA	NA	NA	NA	NA	NA	NA	NA	NA	NA	NA	NA	NA	NA	1	NA	NA	NA	NA	NA	NA	ATGGCAGTCCGTGGAGATAGCAGCGCTAGTATGGCCTCGGCATCGCCGAGAAGCATAATTCGAGAAATAGCACCATGTGACACCCCTCCCTTCCCCCTCTCCCGCTCTAAAGACATGCCTAAGCGAAATAGGCGTCGCGAGAGAAATAATGGAAATGTACGCTAA
218	ADOR3B80114	NA	NA	NA	NA	NA	NA	NA	NA	NA	NA	NA	NA	NA	NA	NA	NA	NA	NA	NA	NA	NA	NA	NA	NA	NA	NA	NA	NA	NA	NA	NA	NA	NA	NA	NA	NA	NA	NA	NA	1	NA	NA	NA	NA	NA	NA	ATGTGTGAAAAAGACTTTGCTTTACAAAATGTCGAATTGAGAAAACAAACAAAGAGTAACAACGATATCTTGCGTATCGATAATTCGACTAAAAATTTGTATCTTTGGCAATTTATCCTCGAAGAGAACGGAAGGAATCTACGACACGTTTAG
219	ADOR3B80116	NA	NA	NA	NA	NA	NA	NA	NA	NA	NA	NA	NA	NA	NA	NA	NA	NA	NA	NA	NA	NA	NA	NA	NA	NA	NA	NA	NA	NA	NA	NA	NA	NA	NA	NA	NA	NA	NA	NA	2	NA	NA	NA	NA	NA	NA	ATGCGTGGTTTCGCGGGTAATCGAAAACCCATAGTCGCCGTACTCGCCCACTTTCGAGAAGACCCATCCGTTCCCACGTGGGGAAACATCCGATCGACGTCGAGGCCCTTCGAGATGACCGAGAGAGTTGGAGGGGGGAGCGGAAGCGAAGTACCTCGACGGCACGAAGAACGCCGCGGAAACGCGGTTTGGAACGCGCCCTCCTCCTCGAAAACTCGGCCGACCGACTTGGACTTACTCCGTTCGAGCGCGATGAGGAAACGGTTGAGGGGTGAAAGGTGGATCGCGAGGTTAAACTCGTGGATTGAGGAGCCGGCTATNNNNNNNNNNNNNNNNNNNNNNNNNNNNAGGAAAGCTGGCGACTCGTGGTCGACTCGTGACCCGTGGCAACGAGGGACA…
220	ADOR3B80117	NA	NA	NA	NA	NA	NA	NA	NA	NA	NA	NA	NA	NA	NA	NA	NA	NA	NA	NA	NA	NA	NA	NA	NA	NA	NA	NA	NA	NA	NA	NA	NA	NA	NA	NA	NA	NA	NA	NA	2	NA	NA	NA	NA	NA	NA	ATGAAAAGGGGCGTGGGATTTCTTTGGACGCGAGAGACGACGAGTTGGCTTCGAAAAGAAGAAGAAGAAGGAGGAGGAGGAGGAGGAGGAGGAGGAGCAAAAGAAGAAGAAGAAGAAGAGGAAGAAGAAGAAGAAGAAAAAGAAGAAGAAGAAGAAGAAAAAGGAGAAGGAGGNNNNNNNNNNNNNNNNNNNNNNNNNGAAGAAGAAGAAGAAGAAGAAGAAGAAGAAGAAGAAGAAGAAGAAGAAGAAAAAGAAGAAGAAAAAGAAGAAAAAGAAAGAGGAGAAGAAGAAGAGGGAGAGGAAGAAGAAGAGGAAGAGGAAGAAGAAAAAGAAGAAAAAGAAGGAGAAGGAGAAGAAGAAGAAGAAGAAGAAGAAGAAGAGGAAGAGGAAGGAGGAGGA…
221	ADOR3B80125	NA	NA	NA	NA	NA	NA	NA	NA	NA	NA	NA	NA	NA	NA	NA	NA	NA	NA	NA	NA	NA	NA	NA	NA	NA	NA	NA	NA	NA	NA	NA	NA	NA	NA	NA	NA	NA	NA	NA	1	NA	NA	NA	NA	NA	NA	ATGGAAAAAGAAATTTATAGAAATGTAAAGGAAAAACTTGTCATTAAGAAAAACCCTGTTCGTAGAGGAGATTATTTCTTCGACGAGTACGCTCGACATATGGATAGTATATATATAAATTCAAACGCCATGATGATTGGCAATGCGGAAGACGAATACGATCCATCTCAATTCCACGAACGTTCTAAACGAATCCAAGACGATGGTTTACCGATCATAAAGAGAACGGCTCTTCCTCACACCCTCGATCCTCGTATATCACTCTTAATGTAA
222	ADOR3B80139	NA	NA	NA	NA	NA	NA	NA	NA	NA	NA	NA	NA	NA	NA	NA	NA	NA	NA	NA	NA	NA	NA	NA	NA	NA	NA	NA	NA	NA	NA	NA	NA	NA	NA	NA	NA	NA	NA	NA	1	NA	NA	NA	NA	NA	NA	GATGACAAAAGCGCCAAGATCTGCCATTGACATTTCCGATATAGATTGTGAGAACTTGAAATCCAATTTCTTGAAGAGGAAGAGGATTGCTCTGGCGAAGAATCCTGAGCGCGAAAGCTTCGACTCCATTCAGTCGAAGAAAAAGATCAAGGCGCGGCGCATGGGAATTCCAGAAAAAGTGCGACAGATAGAACGATAG
223	ADOR3B80141	NA	NA	NA	NA	NA	NA	NA	NA	NA	NA	NA	NA	NA	NA	NA	NA	NA	NA	NA	NA	NA	NA	NA	NA	NA	NA	NA	NA	NA	NA	NA	NA	NA	NA	NA	NA	NA	NA	NA	1	NA	NA	NA	NA	NA	NA	ATGGAAATATTGAGTAAAAAGAAGCTAGCAATCGAGCCAAGGAAGACTCCTTTCACAGCGAGTGGTGAATACATACAAGAATGTATAAGAGATTCGCGCGGATCTCTTCGCGGAGTGGTAAAGGAGATGGAATCAATCCATAAGGGAGAGGCTATTTTATGGCATTTTCCCCGATGGAGGAAAGACTGCAATATAACTACTCGAACACTACGTAACAGTTTCTCACAGACCATAGAGAATTCGCGGACAAGCTCAAGAAACTCGGGCTGCAACGATCCGCGGCATGCGTTTGCAATAAGGAGTGAGAGATTCCGTTCTTCTGGACTATGGGTTGTTCAAGCAAAAGCGATAGCAACTGCAAAAAAGATGCACAGAAAAGGGGATAACATGGCCATCAGG…
224	ADOR3B80142	NA	NA	NA	NA	NA	NA	NA	NA	NA	NA	NA	NA	NA	NA	NA	NA	NA	NA	NA	NA	NA	NA	NA	NA	NA	NA	NA	NA	NA	NA	NA	NA	NA	NA	NA	NA	NA	NA	NA	1	NA	NA	NA	NA	NA	NA	ATGAAGAAGAGATTCGATGGAGATTCGCGAGAATTTCCAAGAGATTGGATTTTGGAACTTCGATCTATATATATATATTTAAATGTATACTTTTTTCATTCACCAGAGCCAGAAACTGCTCTAAATCAGGCCCTCGGAGAGACTTTCGAGGCTGTGTATGGGCAA
225	ADOR3B80152	NA	NA	NA	NA	NA	NA	NA	NA	NA	NA	NA	NA	NA	NA	NA	NA	NA	NA	NA	NA	NA	NA	NA	NA	NA	NA	NA	NA	NA	NA	NA	NA	NA	NA	NA	NA	NA	NA	NA	1	NA	NA	NA	NA	NA	NA	GACGATGACGAAGAAGAGAACGACGACGAAGAAGAGGACGACGACGAAGAAGAGGACGATGATGAAGATGATGAAGATGAAGACGATGACGAAGATGAGGACGAGGACACGACGTTGAGGAGGAGGAAAAGGCGCGAAGAAAACGGAAGCGGTGTAAAGTGGAACG
226	ADOR3B80158	NA	NA	NA	NA	NA	NA	NA	NA	NA	NA	NA	NA	NA	NA	NA	NA	NA	NA	NA	NA	NA	NA	NA	NA	NA	NA	NA	NA	NA	NA	NA	NA	NA	NA	NA	NA	NA	NA	NA	2	NA	NA	NA	NA	NA	NA	ATGGAAGAAGTATGCTCGTGGACTGCTGGATTTCCTGATCCCGCTGATTTCATGATCTACTACTGTGGCATAGGTGACGCTGGAAAAGTAACGAGCATTGATAGGGAGTCAGATTCAGCATCGTATCAACCAAATCTGTCTTTGGCCAATATTTTTGGATCAGCGATTCGCGAATGTGAACCAGTTTGGAAAAGCAGATCAACAATGGATGCGGATTCTGACAATAAAAAAATGATGAGCGAGAAAACA
227	ADOR3B80161	NA	NA	NA	NA	NA	NA	NA	NA	NA	NA	NA	NA	NA	NA	NA	NA	NA	NA	NA	NA	NA	NA	NA	NA	NA	NA	NA	NA	NA	NA	NA	NA	NA	NA	NA	NA	NA	NA	NA	1	NA	NA	NA	NA	NA	NA	ATGATGCAGTCAGAAAACCAAGCTATGGAAGCATATGCAGAGAAATATGGTACAAAATACGCTGAGTCCATAGGTCTACAGTGGCTGGCAACTCTCGATCAGATCGAGGCTAGACGAATAATTCTAAAGAGAAAAAAACTGGGAACAACAAAAATCATAAGGCCAAGACATCCGAGAAATTTTCGAGAATAA
228	ADOR3B80170	NA	NA	NA	NA	NA	NA	NA	NA	NA	NA	NA	NA	NA	NA	NA	NA	NA	NA	NA	NA	NA	NA	NA	NA	NA	NA	NA	NA	NA	NA	NA	NA	NA	NA	NA	NA	NA	NA	NA	2	NA	NA	NA	NA	NA	NA	ATGGGACGAAAAGGAAAGAAAAAACAAAATGTGCAAAATCATCCACACTCATCTATTTCACAAGAAAGTAGCCCAGAGCAACAACAAAATCCAAGTGATTTACAACAACAATATGTTTCACAACAACAAATACATAGTCAACAACAGCAATCGGACATTTCACATGCATGTCCAAAACAACAGTCAGATAGTCCTCAGCAACAAGCATGGACATATGATCAACAACAACAACAACAACAACATAGTTCACCGCAACAACCACATGGTCAAAGGCAACAGTCGAATAGTCCTCAGCAACAAGTATGGAGACCTAGTCAACAACAACATAGTTCACCACAACAATTACATGGTCAAAGGCAACAGTTGAATAGTCCTCAGCAACAAACATGGAGATCTAAT…
229	ADOR3B80207	NA	NA	NA	NA	NA	NA	NA	NA	NA	NA	NA	NA	NA	NA	NA	NA	NA	NA	NA	NA	NA	NA	NA	NA	NA	NA	NA	NA	NA	NA	NA	NA	NA	NA	NA	NA	NA	NA	NA	1	NA	NA	NA	NA	NA	NA	ATGAAAACGGATGAAGAGCCATTTATTGTAAGCGAATTAGAGTTAAATAGCGATAACGAAGAGGAGAATATTATAAATAAGCGTCCACGTACAGGCAAAAAAGAAAGAATTATTGTTGACCAACATATCAAAACTGTGTTCGATGGAACAGTTTGGAAAATAAGTGGAAGTCCCAAACTTGGCAGAACATCAGTTCATAGTATTTTTAGAAATATGTCAAATTATTTATATACATTCAGTAATAAATTAACCATTATCTACGTTAAATCATAA
230	ADOR3B80213	NA	NA	NA	NA	NA	NA	NA	NA	NA	NA	NA	NA	NA	NA	NA	NA	NA	NA	NA	NA	NA	NA	NA	NA	NA	NA	NA	NA	NA	NA	NA	NA	NA	NA	NA	NA	NA	NA	NA	1	NA	NA	NA	NA	NA	NA	ATGGACGCGGAACGCCCTCCTCCGCTTCCAACGGAATTGCCCTTTGTGCGTGGAATCGGTGGTGCGGCTTGCACGCGACAACCACCCCCAATGTTAAAATATATCGAAGAAGAAGAGGAAGAAGAAGAAGAAGAAGAAGAAGAAGAAGAAGAAGCATTCGTTCTTAGACTTCTTCTTATACCGAGATCTCGAAAGAGAGTTCGAAGATTCTTTTTTCCCCCTCTCGATTCACGATTCTCGCACGATATCCGATGA
231	ADOR3B80214	NA	NA	NA	NA	NA	NA	NA	NA	NA	NA	NA	NA	NA	NA	NA	NA	NA	NA	NA	NA	NA	NA	NA	NA	NA	NA	NA	NA	NA	NA	NA	NA	NA	NA	NA	NA	NA	NA	NA	1	NA	NA	NA	NA	NA	NA	ATGTGGCGTTCGATCGGTCGGAATAATTCAGATCGCGGCCCCTCCTCCTCGTTTCGGAAGGGAATGAGGGGAGGGAGATACGATACGGTTGGAGATACACCGTCCGTTCGTCATTTTTCATCCCAACAGCCGGTGTTGCGTAACGTCCATCTCGTCGATCATCCTGGCGCGACGCGGAACAGAAGCGGAAGATGGAAGGAGGATATCCCTTTTCCTTCCAGCGAGGACGTTCATCCCTCTGAATTTCGTTCGAAGAAGTTCGACGACAACGCGTGTCTCGTCCTCCCCGCGAAAGGAAAGGAAAGGAAAGGCGAGGCGAGGCGAGGCAGAAATCACGCGTCCGCCAGGCACCGGTCGCGTTATGGACCGAGGGGCGAAGAAAAGGACGCCGCTGCTCCT…
232	ADOR3B80227	NA	NA	NA	NA	NA	NA	NA	NA	NA	NA	NA	NA	NA	NA	NA	NA	NA	NA	NA	NA	NA	NA	NA	NA	NA	NA	NA	NA	NA	NA	NA	NA	NA	NA	NA	NA	NA	NA	NA	1	NA	NA	NA	NA	NA	NA	ATGGTTCGTTTGGACGAATATCTCGAGGGCGACAAAGATGGTGGTTGTGATGACGACGACGATGAGGATGATGATGATGATGATGATGATGTGCATTCCTCGCGCGGAGAGGGACGGAAAAAGAAATGTAATCGAATGTATTCGAAACTCACTCGTGAGACATTTCATCGGGGATGGAGAGATCGATGA
233	ADOR3B80250	NA	NA	NA	NA	NA	NA	NA	NA	NA	NA	NA	NA	NA	NA	NA	NA	NA	NA	NA	NA	NA	NA	NA	NA	NA	NA	NA	NA	NA	NA	NA	NA	NA	NA	NA	NA	NA	NA	NA	1	NA	NA	NA	NA	NA	NA	ATGCATCTAAGTAAACTAAAAACTATCTCATCTGAAAAATACAACCCATCTTTAGCTGAATCATCTATTCATCCCTTAAAAATAAAAAAAAGAGGAGGAAGAAAAAGAAATCTAGCATTGTGTACAGCAAATATACTCTTCCTCAGTTTTTCCACTTCCTCGCTCTTGAAACCAAGTTCCAGGCGAAAAGGAGCACCTGAACAAGCTCATCCAGCGCGGATATCCAGCGGGTGA
234	ADOR3B80255	NA	NA	NA	NA	NA	NA	NA	NA	NA	NA	NA	NA	NA	NA	NA	NA	NA	NA	NA	NA	NA	NA	NA	NA	NA	NA	NA	NA	NA	NA	NA	NA	NA	NA	NA	NA	NA	NA	NA	1	NA	NA	NA	NA	NA	NA	ATGAAGAAAGAAGAAAAAGAGAAAATAATGAAAGAGAAAATGATACAAAAAGAAAAAGAAAAAAGAAAGAAGCAAAAAGAAGTAAAGAAAGAAGAAAAAAGAAAAGAAGCAGAAAAGAAAAGAAAGGAATTCATAAAAAGAAAAGAACAAGAGAAAAAAGAAAGAGAGAAAATGAAAAGAGAGAAGATAAAGGAAAAAGAAAAAGAGAAAAGAAAAAAAGAAGCAGAGAAAATAAAGAAAAAGAAGAATAAAGATGAAGAGAATAAGAAAAAAGAGAAAATTAGGAAACAAGAAGAAGAAATAAGAAGAGCAAAGCTGAAAATTGCTGAAAAAGAAGATAAAATAAAAGAAGAAAAGATGATGATAAAAAAAAGAAAGGAAAATATATAG
235	ADOR3B80278	NA	NA	NA	NA	NA	NA	NA	NA	NA	NA	NA	NA	NA	NA	NA	NA	NA	NA	NA	NA	NA	NA	NA	NA	NA	NA	NA	NA	NA	NA	NA	NA	NA	NA	NA	NA	NA	NA	NA	1	NA	NA	NA	NA	NA	NA	TATTGCCAGCCCCCACACTTTCCAATTGCATTTGCCTATCCGTTCTTCTTCTTCTTCTTCTTCTTCTTCTTCTTCTTCTTTTCCTGGACGAAGAGGAAGCGAAGGAAGAAATGGAAATGGAATGGAAGAAGAGTTTATCGATCTGTCGAGGTTTTTAAAGTTGTACACGGCGTATAATAAAGGTGTATGTAGGAGAGAAAATTCAGCAATTGGTGTGGT
236	ADOR3B80279	NA	NA	NA	NA	NA	NA	NA	NA	NA	NA	NA	NA	NA	NA	NA	NA	NA	NA	NA	NA	NA	NA	NA	NA	NA	NA	NA	NA	NA	NA	NA	NA	NA	NA	NA	NA	NA	NA	NA	1	NA	NA	NA	NA	NA	NA	ATGAATATCGAGGGTCGAAATGATCTGGTACATTGGGGTGGAGATTACACTGGAAAAAGAAATCGTGAAAGAGGATGCAGATTAAGAAGGAGCATGACCTTTGTAGGAAGAGGAATCGGGATTGAAAGACGGAAGTTGATGAAGTCATTGAGCAACTGGTTCGATATTATCGTAAAGAAAAGGAGATTTTGGTTGAAACATGAATAA
237	ADOR3B80300	NA	NA	NA	NA	NA	NA	NA	NA	NA	NA	NA	NA	NA	NA	NA	NA	NA	NA	NA	NA	NA	NA	NA	NA	NA	NA	NA	NA	NA	NA	NA	NA	NA	NA	NA	NA	NA	NA	NA	1	NA	NA	NA	NA	NA	NA	TCGAATTGGGGAGGTGGGAGAGAGGAGAGAAAAGAAGAGAGAGAGAGAGAGAGAGAGGAGAAGAGAGAAGAGAGAGAGAGAGAGAGAAAGAGAGAGAGGGGAGAGGAGAGGAGGAGAAGAAAGAAGAGAGGAGAAGAAAGAAGAAGAAAGGAGAAGAAAGGACAGAAGAAAAAAGGAGAAGAGAAGGAAAGAAGAGAGGAAGAGAGAAGAAGGAGATGAGAAGAGAGGAGAGGAGAGGAGAGGAAAGAAGAAAGGAGTGGAGAAAAGAGAAAAGGAGAAGAAAAGAGAGGAGAGGAGAAAAAAAGAAAGAAGAGAAGAGAGAAGAAGAGAAGAGAAAAAAGGAGAGGAGAAAAGAGGAGAGAAGATAGGAGAGGAGAAGAAAGGAGAGGAGAAAAAAGG…
238	ADOR3B80303	NA	NA	NA	NA	NA	NA	NA	NA	NA	NA	NA	NA	NA	NA	NA	NA	NA	NA	NA	NA	NA	NA	NA	NA	NA	NA	NA	NA	NA	NA	NA	NA	NA	NA	NA	NA	NA	NA	NA	1	NA	NA	NA	NA	NA	NA	ATGTCGAATCTTGTATTTCCCGTGGTGCTCGGTCAGGAGGACGTGCCAGCTCGATATCCAAACTCGAATATCCAACAATGTCCCGAAAGTATTCTTCAGATGAATCCAGTCAATGGCACGAGAAAAGGGCAAAAGGATGACGGGGCACGGTTTGAAGTTGAAATTCGCACTAATGAAAAATCTTGGGATTGA
239	ADOR3B80306	NA	NA	NA	NA	NA	NA	NA	NA	NA	NA	NA	NA	NA	NA	NA	NA	NA	NA	NA	NA	NA	NA	NA	NA	NA	NA	NA	NA	NA	NA	NA	NA	NA	NA	NA	NA	NA	NA	NA	1	NA	NA	NA	NA	NA	NA	ATGGATTTTATCGAGATGCCCCTACGAAGATCTTCTGGTCGCGATACAAGTAATCCCGAAGACGGTTCCTCTCGTTCAACGGCTCTCGTCATAAACCGACGAAATGATCCTCTTACGCGGGATAGGCAGAGACGTCGAGGCGAGCGAGGAGGAGGAGGAAGAGGAGGAGGAGGAGGTTGGAAAAAGATTGGCACGTCACGAAGGAGATCGCGAAGCAGGGAAACCCGCGATTCGATGGGGGAGGGGGACACGAAAATAATGATTCTACGGCCGCGAGATAATTAG
240	ADOR3B80311	NA	NA	NA	NA	NA	NA	NA	NA	NA	NA	NA	NA	NA	NA	NA	NA	NA	NA	NA	NA	NA	NA	NA	NA	NA	NA	NA	NA	NA	NA	NA	NA	NA	NA	NA	NA	NA	NA	NA	2	NA	NA	NA	NA	NA	NA	ATGGCTAACGCTGTACCTACATGTGTCTATCCGCGAGAGATATCCCGTAGGATTGCCGAGGAGAAAGAGAGAGAGCCGGGAGAGAGGGAGAAGGATGGAGAGCCTTTGACACTTGACGACGAGGCAAGGGTGGACGGAGGAAAAGAAGAAGAAGAAGAAGAAGAAGAAGAAGAAGAAGACGAACGAGAGGAGAGAAGAAGTCGAAGAGCTGGGCGAGCGAGAATCCTGCCGCGAGACCTCCTCTTCGGAAGACTTCCTCGAGCTCATTACGCCGACAATAATTAA
241	ADOR3B80312	NA	NA	NA	NA	NA	NA	NA	NA	NA	NA	NA	NA	NA	NA	NA	NA	NA	NA	NA	NA	NA	NA	NA	NA	NA	NA	NA	NA	NA	NA	NA	NA	NA	NA	NA	NA	NA	NA	NA	1	NA	NA	NA	NA	NA	NA	ATGTTTTTCTCGTATTCTTTCGGAAGAGGAAGGAAGAGGAAAGAAGAGGAAAGAAGAGGAAGGAAGAGGAAAGAAGAGGAAGGAAGAGAAAGCAAGAGGAAGGGAGAGGAAAGAAGAGGGAGGAAGAGGAAGGAAGAGGAAAGAAGAGGAAAGAAGAGGAAGGAAGAGGAAAGAAGAGGAAGGAAGAGGAAAGAAGATGAAGGAAGAGAAAAGAAGAGGAAAGAAGAGGAAGATAGAGGAAGGAAGAGGAAGCAAGAGAAAGCAAGAGGAAGGAAGAGGAAAGAAGAGGAAGGAANNNNNNNNNNNNNNNNNNGGAAGAGGAAGGAAGAGGAAAGAAGAGGAAAGAAGAGGAAGGAAGAGGAAGGAAGAGGAAGGAAGATGAAGGAAGATGAAGGAAGG…
242	ADOR3B80320	NA	NA	NA	NA	NA	NA	NA	NA	NA	NA	NA	NA	NA	NA	NA	NA	NA	NA	NA	NA	NA	NA	NA	NA	NA	NA	NA	NA	NA	NA	NA	NA	NA	NA	NA	NA	NA	NA	NA	1	NA	NA	NA	NA	NA	NA	ATGACAAAATTACTTCTATTCATAAAGAAATTAATAAATAGAGAAAGCAATGGTGAACATAGAGATGAAATAAGAGGTATAAGAAGGCAAAAAATAAGAATAATAGATAGTGAATGTGAAAGCAATCAACTGAAGATATTGCAGAAGACACAGAAAATTCCAAATGGATAA
243	ADOR3B80325	NA	NA	NA	NA	NA	NA	NA	NA	NA	NA	NA	NA	NA	NA	NA	NA	NA	NA	NA	NA	NA	NA	NA	NA	NA	NA	NA	NA	NA	NA	NA	NA	NA	NA	NA	NA	NA	NA	NA	1	NA	NA	NA	NA	NA	NA	ATGTTCGATGTGGCGTTCCCCATTCAAGTTGCAATATTACTTATTTATAGTATGGAAATTGACGATACCGTAAACGTTAATCCGTTCAACTCGGGTCAATCGGATGACCGATACGTAGGAGTAGAGTGCAACCTACCTACTACAGCAGTAGCTGTAGAACAGGTTAAAAACCCTTTTCCCCGCGATACTCGACGACAATTCCAATTCTTCGATTAA
244	ADOR3B80350	NA	NA	NA	NA	NA	NA	NA	NA	NA	NA	NA	NA	NA	NA	NA	NA	NA	NA	NA	NA	NA	NA	NA	NA	NA	NA	NA	NA	NA	NA	NA	NA	NA	NA	NA	NA	NA	NA	NA	1	NA	NA	NA	NA	NA	NA	ATGGGGCAAAGACGGGAGAGAGGTATGGGCGTGAAGGCGAGCAGAAGGGTGAAACGAAGGGTGAAAAGGGGAGGGGGAGAAGAGGCGAGCGAGCGAGCGAGCGAGAGAGAGAAAGAGAGAGAGAGAGAGGAAGGTGAGCGTGTGGGTGGACGATCCGGGTCTGGTCTCCGTGGAGAAGCAGAAGGTGATACGGAGGCACGGAGAGTGGTAGGGATGGATCGGATCCTGGATGGTGGGAGCCGAGTTTTCTCCTTGGCGCGGTGGGGATGCCGATGA
245	ADOR3B80352	NA	NA	NA	NA	NA	NA	NA	NA	NA	NA	NA	NA	NA	NA	NA	NA	NA	NA	NA	NA	NA	NA	NA	NA	NA	NA	NA	NA	NA	NA	NA	NA	NA	NA	NA	NA	NA	NA	NA	1	NA	NA	NA	NA	NA	NA	ATGGTACGTATAATAGCACGTATAATCGATGACGATAGGGATAGCAAGATCTGGAGATTGATGGTATACAAGTTTCATCGCTACGCTGTTGTTGTTGCTGTTGCTGTTGCTGTTGCTGTTGCCGCTGCTGCTGCTAATGGAAGCGAAACTCGCTGTTGTCGTGGTGGCAAGCCGATACAGGTGCGAGTATCCGGTCGCGCGAACGAACAAGAGGTGGCAGACTGA
246	ADOR3B80355	NA	NA	NA	NA	NA	NA	NA	NA	NA	NA	NA	NA	NA	NA	NA	NA	NA	NA	NA	NA	NA	NA	NA	NA	NA	NA	NA	NA	NA	NA	NA	NA	NA	NA	NA	NA	NA	NA	NA	1	NA	NA	NA	NA	NA	NA	ATGCTTGAATCATCAGAAAATGAAATTGATGGTATATTAAAATTTACTAATATATATCAATCGGAAGCGAAGATTTTGTGGATATGGTTATTAGAAGACGTTCAAGATTTATTAGTGGAAGAAGAAGTTGACAAATCAGATTTGATGGAAATCCGAAGCTGTAAATCAAATCGATTCTGA
247	ADOR3B80366	NA	NA	NA	NA	NA	NA	NA	NA	NA	NA	NA	NA	NA	NA	NA	NA	NA	NA	NA	NA	NA	NA	NA	NA	NA	NA	NA	NA	NA	NA	NA	NA	NA	NA	NA	NA	NA	NA	NA	1	NA	NA	NA	NA	NA	NA	ATGAAGGGAAAGGAGAACGATATTGATGAGAATAGATATATTTTAATAGATGCAGAATACAGAAGTATAAGATGTTATGTGGATAAAGGGATGAGAACGATAGGAGAAGGGTTTGAGAACTCTGGAGATGCAATGGTAGAAAGATCTGGTATATGA
248	ADOR3B80371	NA	NA	NA	NA	NA	NA	NA	NA	NA	NA	NA	NA	NA	NA	NA	NA	NA	NA	NA	NA	NA	NA	NA	NA	NA	NA	NA	NA	NA	NA	NA	NA	NA	NA	NA	NA	NA	NA	NA	1	NA	NA	NA	NA	NA	NA	ATGTGTCGGCAGTGTCGACAGAAAGACGTATACGGTGGTAGAGCACACACGAGTTTCATAAGGGCGAAAAGACATTGGACATTGAAGAAATTTCGTGTAGGTGGAAAAGGAAATAATGTTTCTTACGTCGTGATCGTTGTTGGTGGAAAAGTTTTGGCTCGAGGAGAGGGGCGGTTTTTGGATGAAGTTTGTTTTAAAGTGGATGAGAGGGAATCGGGAATTGGAAGATGTTTTTTGGTGGAGGAAGTTAAGATGTTGGTTAATTTTATTGCTCGTGATAGGTATTGTTGA
249	ADOR3B80393	NA	NA	NA	NA	NA	NA	NA	NA	NA	NA	NA	NA	NA	NA	NA	NA	NA	NA	NA	NA	NA	NA	NA	NA	NA	NA	NA	NA	NA	NA	NA	NA	NA	NA	NA	NA	NA	NA	NA	2	NA	NA	NA	NA	NA	NA	ATGATGGAAAGGGCTGAAGTGGAACGGTACAATAGCCGTAAGGATGACGATGACTGCGACGAGACGAAGCATGGCCACCAAAATGACGACGACGACGACGACGACGATGATGACGATGATGATAATGATTATTATGATGATGATGATGATGATGATGATAGTGATGGGGACGGAGGTAGTGGCTCGTAA
250	ADOR3B80394	NA	NA	NA	NA	NA	NA	NA	NA	NA	NA	NA	NA	NA	NA	NA	NA	NA	NA	NA	NA	NA	NA	NA	NA	NA	NA	NA	NA	NA	NA	NA	NA	NA	NA	NA	NA	NA	NA	NA	2	NA	NA	NA	NA	NA	NA	ATGGATCGCGGGAGCGGACGTGTGCAATTAGATGAATATGATGCGAGAGAGAACACGATCGATCGATCGACCCACTCGAGCCTGGTTGGAAGAGAAGAGGAAGAAGAGGAGGAGGAGGAGGAGGAGGAGGAAGAAGAAGAAGAAAGAGAAGGAGAAGAAGAAGAAGAAGGAGAAGAAGAAAAAGAAAGAATAAGAAGAAGAAGAAGATGCAAGAAGAAACCGTGCGAACACGGTGGTTTCCCCTCCCCCTTCTGTCTTTGTAGATACACACGAGAATACACAACACGTTAG
251	ADOR3B80399	NA	NA	NA	NA	NA	NA	NA	NA	NA	NA	NA	NA	NA	NA	NA	NA	NA	NA	NA	NA	NA	NA	NA	NA	NA	NA	NA	NA	NA	NA	NA	NA	NA	NA	NA	NA	NA	NA	NA	2	NA	NA	NA	NA	NA	NA	GCCTCGTTTATATCGCCTCTCGAGAGGCGCCTTGCCTTCCTCTCCCGCCTCGCCTTCGCCCTTCCTCGTCCCAACAAAGGTGGAAGATCGTTCGAAAACCCTGCCTACCTCTCTCTCTCTCTCTCTCTCTCTTCCATTCGAGGTTAAGCAAGCATCGGTCACCGGTGCGTTCCCGACCTCGTATCCACATCTGGAGGAGCAATTAAACGGCATTAAGTGGCGTGATGGCAAGCGGACAGTTGATGACGACGACGACGAAGAAGAAGAAGAAGAAGAGGTGGAAAGAAAGGAACGGAGGAAAAAGGGAAAAAGGCGTTGGGGGTACACTGGACTCGTGTCAGATGTTAATTAA
252	ADOR3B80401	NA	NA	NA	NA	NA	NA	NA	NA	NA	NA	NA	NA	NA	NA	NA	NA	NA	NA	NA	NA	NA	NA	NA	NA	NA	NA	NA	NA	NA	NA	NA	NA	NA	NA	NA	NA	NA	NA	NA	3	NA	NA	NA	NA	NA	NA	ATGCGGATATATCCGTCGAAAAAGAAGAAAGAAACGAAAGAAGAACAAAATATTTCTCCATTTTGCAGATTGCCTGATTATAATAAAAGCGGAAAAAAAGAAATACAATATAAAAATACCGATGATGATGATGATGATGATAATGATGATGATGATGATAATAATAACAACAATAACAACAACAATAATAATAATAATAGTAATAATAATAATAGTAATAATAATAACAGTAATAATAATAAAAATAGTAATAATAATAGTAATAATAATAACATAATTAACAACAACAATAATACTGATAATGATAATGATAATGATAATAATAATGATAATTATAACGATAATGATATTGATATTGATATCGATAATGATAATAATAATTACAATAATAATAATTGT…
253	ADOR3B80418	NA	NA	NA	NA	NA	NA	NA	NA	NA	NA	NA	NA	NA	NA	NA	NA	NA	NA	NA	NA	NA	NA	NA	NA	NA	NA	NA	NA	NA	NA	NA	NA	NA	NA	NA	NA	NA	NA	NA	1	NA	NA	NA	NA	NA	NA	ATGGATTTTGGTGAAATCATTCATCGAGACACGAATTATGTAGATAAACCAAACGCTGCTTCAAAAACTGTTACTCTGAGGCAAATTCATTATTATGCTATTTCATATGTTAACTATGCTAGATTATGCTTGTTATCATATTACGAAAATCGTAGTTAA
254	ADOR3B80420	NA	NA	NA	NA	NA	NA	NA	NA	NA	NA	NA	NA	NA	NA	NA	NA	NA	NA	NA	NA	NA	NA	NA	NA	NA	NA	NA	NA	NA	NA	NA	NA	NA	NA	NA	NA	NA	NA	NA	2	NA	NA	NA	NA	NA	NA	ATGGATGATGATGATAATGATGATGATGGTGATGATAATAATAATGATGATAATAATGATGATGATGATAATAATAATNNNNNNNNNNNNNNNNNNNNNNNNNNNNNNNNNNNNNNNNNNNNNNNNNNNNNNNNNNNNNNNNNNNNNGATGATGATGATGATGATGATGATGATAATGATGATGATGATGATGATGATGATGATGATAATAAATAA
255	ADOR3B80441	NA	NA	NA	NA	NA	NA	NA	NA	NA	NA	NA	NA	NA	NA	NA	NA	NA	NA	NA	NA	NA	NA	NA	NA	NA	NA	NA	NA	NA	NA	NA	NA	NA	NA	NA	NA	NA	NA	NA	2	NA	NA	NA	NA	NA	NA	ATGCAGGAGAGAAAGGAGACGAGAGAAAGAGAAGGAGAGAAAGGAGATTTGGAAGAAGAACAAGAACATGAAAAAGAAAAAGAAAAAGAAAAAGAAGGAGAAGAAGAAGAAGAAGAAGAAGAAGAAAGAGAAGCGGAACAGAGGTGGATCAATTTAGGAAAAAAGAGAAAAAGGAAAAAAAGAAAAAAATACGAAGATGAGGATGACGAGGGAGAGGAGAGGAAGAAGAATATAGAAAGTCCGTAG
256	ADOR3B80447	NA	NA	NA	NA	NA	NA	NA	NA	NA	NA	NA	NA	NA	NA	NA	NA	NA	NA	NA	NA	NA	NA	NA	NA	NA	NA	NA	NA	NA	NA	NA	NA	NA	NA	NA	NA	NA	NA	NA	1	NA	NA	NA	NA	NA	NA	ATGGTAGAAATCGACGATCCGATATCCGACATCAAACACAACATGAAACGTGGTGGCAACAGAGACCAGACCAGTGTCACGATCGCCGAGCGACCAAGTGGAAAAGCCAAGGAACGGACCCCGGCTCAAGCAACGGTGGATTCCTCCTAG
257	ADOR3B80448	NA	NA	NA	NA	NA	NA	NA	NA	NA	NA	NA	NA	NA	NA	NA	NA	NA	NA	NA	NA	NA	NA	NA	NA	NA	NA	NA	NA	NA	NA	NA	NA	NA	NA	NA	NA	NA	NA	NA	1	NA	NA	NA	NA	NA	NA	GCGATCTTGGGAACGGATGCGATACCTGGGATTCCGGTGAAAAGGCGAAAGGTCGAAGGCGGTTCCTCTACTCGATCGCCTACGACGATGGGTTCGCGCGATCGTATGCGAACGACGACGATGACGACGACGACGACGACGACGACGACGACGGGCGATCGGCAGCACGCACTCACGCACGCACGCCTCCTTACTCGCTTATGAAGTTAATTGAGGGCAAACGTCCACCACCGCCACCACCGTTGAAATACTGA
258	ADOR3B80449	NA	NA	NA	NA	NA	NA	NA	NA	NA	NA	NA	NA	NA	NA	NA	NA	NA	NA	NA	NA	NA	NA	NA	NA	NA	NA	NA	NA	NA	NA	NA	NA	NA	NA	NA	NA	NA	NA	NA	1	NA	NA	NA	NA	NA	NA	CCCTCGGTCACGAACCCCTTTCTTCTTCCTCTTCTTCTTCCTCTCCTTCTACCTCCACCCGGAAGAAAGGTGGACGAAAAGCGATCGATCTCTCTCCCTTTCGAAGAAACGAAAGAAAAGAAAAGAAACGAGAAAAGGTGGCGAAGGTGTCGATTCGGGAACCGTTTCACCGGAAGGGGAAGGAGAAGCGTCGCTTCCGATTAAAGAGGGGGATGTCGACACGATACGATTCT
259	ADOR3B80450	NA	NA	NA	NA	NA	NA	NA	NA	NA	NA	NA	NA	NA	NA	NA	NA	NA	NA	NA	NA	NA	NA	NA	NA	NA	NA	NA	NA	NA	NA	NA	NA	NA	NA	NA	NA	NA	NA	NA	1	NA	NA	NA	NA	NA	NA	GAAAAGGATTAGAGCAGGGAGCGTTTTTCGCGTTCGTCGTCGGCGAAGGTTTGAGACGCGCGATGTGGAGCGAAACGGGAGCGAGGCCGCGCTCAGCGGGAGATCCGGGCTCGAGCCGGGACGCAGAGAGGAGAGGAGAGGAGAAAGCTCGGATGGAAAACTCGGAAGAAAAGGAAAAGAAAATTAAACGCCCGAAACGGGACGTTTCACGAACGTGCTCTCAGAAGTTAAGAAGGAGCTCGACAATGGGCCACTCGATGCGTGATAAGGAGGGGGGGAGGGGGCCGCTAAACCGGGATTACGCGCAG
260	ADOR3B80451	NA	NA	NA	NA	NA	NA	NA	NA	NA	NA	NA	NA	NA	NA	NA	NA	NA	NA	NA	NA	NA	NA	NA	NA	NA	NA	NA	NA	NA	NA	NA	NA	NA	NA	NA	NA	NA	NA	NA	1	NA	NA	NA	NA	NA	NA	GTGGTGGTGTAGGATCGGTCCGAAAAAGGATCGTGCCCAACCAACACGCTCCAAGGATTACGCGCGTATCCCTCCTCCCATCCAGCGCATTCTCTATGGCCTCTCCACTTCTTCTTCTTCTTCTTCTTCTTCTTTTTCTTCCTACTCTCGTTCC
261	ADOR3B80452	NA	NA	NA	NA	NA	NA	NA	NA	NA	NA	NA	NA	NA	NA	NA	NA	NA	NA	NA	NA	NA	NA	NA	NA	NA	NA	NA	NA	NA	NA	NA	NA	NA	NA	NA	NA	NA	NA	NA	2	NA	NA	NA	NA	NA	NA	ATGGCCTATAGCGCTCATACGCTCGCTCTCCCCCCTCCCTCCTTCCCTTGTTGTCCATGGGAGGGACAACGGCCACGGCAACGGCAACAACAACAACAACAACANNNNNNNNNNNNNNNNNNNNNNNNNNNNNNNNNNNNNNNNNNNNNNNNNNNNNNNNNACGGCAACGGTCGAGACATGCACGCACACCGATTGCAAAAGAAGAAAAAGAAAGGAGAAAAGAGGAGAGAGGGGAAAAGAAGAAGAAGAAGAAGGAAGGGTCGGTCGGTCGACGATGCGGCCCGGAGAGAGAAACGATAGGGGTAGTGGAGAGAAATCGAAAGAGAGAGAGAGAGAGAGAGAGAGAGAGAGAGCGTTGTACGACCGAGAAACGAGCAAAAAGCGAAGGAAGCGCGGCC…
262	ADOR3B80453	NA	NA	NA	NA	NA	NA	NA	NA	NA	NA	NA	NA	NA	NA	NA	NA	NA	NA	NA	NA	NA	NA	NA	NA	NA	NA	NA	NA	NA	NA	NA	NA	NA	NA	NA	NA	NA	NA	NA	2	NA	NA	NA	NA	NA	NA	GAGGGGAGGGGGTCATCGTGCCAAGGACGGAGAAAAGGGCCCGGTACAGGAGAAGAGAGAGAGAGAGAGAGAGAGAGATGGAGAGAGAGAGAGAGAGAGAGAGAGAGAGAGAGAGAGAGAGAAGAAAAAAAGAAAGGAAAAAAAAGAGAGAGAAAA
263	ADOR3B80454	NA	NA	NA	NA	NA	NA	NA	NA	NA	NA	NA	NA	NA	NA	NA	NA	NA	NA	NA	NA	NA	NA	NA	NA	NA	NA	NA	NA	NA	NA	NA	NA	NA	NA	NA	NA	NA	NA	NA	4	NA	NA	NA	NA	NA	NA	GCAAGAAGAAGAAGGAAGAAGGGCAGAGAAGAGATCGATAGAGAGAGAGAGAGAGAGAAACGTTCGTTAAATCGCGTTTTTACCACTATCCCGAGCTTTCTGTCCCGTTCCAACGCGTTTAATAACACGCGCGAGATTGTTATTACGATTCGACGCGGAGGAGCGGCGGTGGATAACGCTCGAGCCAAAGTTGGTGCGCTTCGAAGGGAGATCTGTCCGCTGCGTTTCTACGTCGGCACGATGCACAGGGAGAGAGAGAGAGTAAGAGAGAGAGAGAGAGAGAGAGAGAGAGAGGGAGAGAGAGAGAGTAAGAGAGAGAGAGAGAGAGAGAGAGAGAGAGGCCCTCGACCTCGGAACAGTGTTACGTGTCAGGAGGAAACAATTTTTCCACGGATAAGT…
264	ADOR3B80456	NA	NA	NA	NA	NA	NA	NA	NA	NA	NA	NA	NA	NA	NA	NA	NA	NA	NA	NA	NA	NA	NA	NA	NA	NA	NA	NA	NA	NA	NA	NA	NA	NA	NA	NA	NA	NA	NA	NA	1	NA	NA	NA	NA	NA	NA	ATGCGAATGGGAGGGGGGAGGGGTTGGAGAGCCAGCAAGCGGAAAGAAGATCGACGGGTATTGAAATTCCGGAAAGGAATTCTTCGCGATTCCTGCTGCTCGTCGCAGTGTCGACTCGTGTCGTTTCATCCTCCCCCTCCTCTCAACCGCATTCTAAACCCGTCCCTCGATCTCGGTTTGGCAACAGTTCCCCGCCCGCTTTTTCACGATCTCTTTCGAATATCCATCGCGTCTCCGTTCGCGGAGAGGGATGGGCCAACGGCCAATCGGTCGCCCGATTCTTCTTCGCGGCCAGGATTAATCCACTCCACTCCCTGCGAAAAGAGAATCTCGCGTTGGAACGTTGGAGATTTTTCAGCCGCAAAAAATNTTTATCTCTCTTAG
265	ADOR3B80458	NA	NA	NA	NA	NA	NA	NA	NA	NA	NA	NA	NA	NA	NA	NA	NA	NA	NA	NA	NA	NA	NA	NA	NA	NA	NA	NA	NA	NA	NA	NA	NA	NA	NA	NA	NA	NA	NA	NA	1	NA	NA	NA	NA	NA	NA	ATGGCGAAAACGCGTGGACAAAAGGGAAGCGGAGGAGCAGAAAGAAGGCGAAGTAGAACACGAGAAGAAGCAATAGAGCGGAAGGACAACGACGAGAGGAAGCGAGGTTTCGAGCGAGAAGGCAGGACGAGACCTCTGCTACAAGGGGTTGGGCTAG
266	ADOR3B80466	NA	NA	NA	NA	NA	NA	NA	NA	NA	NA	NA	NA	NA	NA	NA	NA	NA	NA	NA	NA	NA	NA	NA	NA	NA	NA	NA	NA	NA	NA	NA	NA	NA	NA	NA	NA	NA	NA	NA	2	NA	NA	NA	NA	NA	NA	ATGAAACGTTATCGTAGTAAAACGCTGTGGGCAATACAGAGCGAGAGTCGAGAATCTCTCAAGAGTACTATACATACACTTTTTCCCTCGAATAAGAGAAAAATCATCCACGTGCGCCTGTTTCGCACAAACACCATACATTTCCAGTGCTGTTACATCAGCGACATAAGCACGCGAGGAAGTACTAGTAGTAGTAGTACTAGTAGTAGTAGTAGTAGTAATAGTACTAGTAGTAGTAGTAATAATAGTAGTAGTAGTAGTAGTAGTAGTAATAGTAGTAGTAATAGTAATAGTAATAGTAGTAATAGTAGGAGTAGTAGTAGTAGTAGTAATAGTAGTAGTAGTAGCGGTAATAGCAATAGTACTAGCAGTATTATTAATAATCACCAGTAA
267	ADOR3B80474	NA	NA	NA	NA	NA	NA	NA	NA	NA	NA	NA	NA	NA	NA	NA	NA	NA	NA	NA	NA	NA	NA	NA	NA	NA	NA	NA	NA	NA	NA	NA	NA	NA	NA	NA	NA	NA	NA	NA	1	NA	NA	NA	NA	NA	NA	ATGACGGTAAACATTGATTGTGATGTATTCAACCTTCCTGCTATATCTCTTGTTGATTTTACTCCAATATTGCCTTTAAAAGATTATCGTCAAGGTCAGAAGGATGTCCCGCCTTTGGTTTGTCCTTTAAAGTCGTATCTTCAGAACAGAATAAAACCAATTTCTAATTCTTCGATTGTTTATTAG
268	ADOR3B80475	NA	NA	NA	NA	NA	NA	NA	NA	NA	NA	NA	NA	NA	NA	NA	NA	NA	NA	NA	NA	NA	NA	NA	NA	NA	NA	NA	NA	NA	NA	NA	NA	NA	NA	NA	NA	NA	NA	NA	1	NA	NA	NA	NA	NA	NA	ATGCTTGATTTGCTTCATTTTAAGACAAGTATAGTCGAAGTACTTATAAAGAGACAAGACAACTATCAGAAAAAGGAGACATCTCTGAGAGTCCAATGTCATCTTCAAGAATTTCAAAAAGAGGCACGTGAAAGTTCGACCAATGTCGGTTTGGACAACATTGGTTTCGACATCTTCCATTGA
269	ADOR3B80480	NA	NA	NA	NA	NA	NA	NA	NA	NA	NA	NA	NA	NA	NA	NA	NA	NA	NA	NA	NA	NA	NA	NA	NA	NA	NA	NA	NA	NA	NA	NA	NA	NA	NA	NA	NA	NA	NA	NA	2	NA	NA	NA	NA	NA	NA	ATGGTGGCGATTGGATCTCCGCCAAATGCCGTTGAACGGCTCGTATCGCAACAACGCCAACAACACCGGCGGCAACAACAATCACCACCACCACCATCACCACCACCGCAACAACAACAACAACAACAACAACAACAACAACGGGAGTTATCTCAATCATCGTAA
270	ADOR3B80514	NA	NA	NA	NA	NA	NA	NA	NA	NA	NA	NA	NA	NA	NA	NA	NA	NA	NA	NA	NA	NA	NA	NA	NA	NA	NA	NA	NA	NA	NA	NA	NA	NA	NA	NA	NA	NA	NA	NA	1	NA	NA	NA	NA	NA	NA	ATGGAAAAAAGAAATGAAAGAAAGATTTCAATTTTTCGCGCGTCGAAACGTTTACTTGAACGTCAATCAAACGAAAGATTCGTCGAATTTGATGAAAATTCGTTGGAACGAGGCTTGGCAGCGATGGAAATCATGTGGCGTAAATTATGGCGCCCTCGTAATCCTTCTGAAGAATCCGTTTCGAGTTCTCCGAAACTGGGCGCGTGGAACGTTAACCCTTTTTATACGTGTGTAATAGACGTTTCGTGGATAGACGTATCCGAAATTAAAGTATCGACCACGCAATTTTCCGTTCCCAATGTATATAAAGAGGTGTACAAAGAGCGTGTCGAATGCGGTTGCACAGTGTATGCATCGAAAGCTGGTATTTGCAGTGTAATTATTCCCAGTATTTAG
271	ADOR3B80516	NA	NA	NA	NA	NA	NA	NA	NA	NA	NA	NA	NA	NA	NA	NA	NA	NA	NA	NA	NA	NA	NA	NA	NA	NA	NA	NA	NA	NA	NA	NA	NA	NA	NA	NA	NA	NA	NA	NA	1	NA	NA	NA	NA	NA	NA	ATGCATTGTTTACGAGCTGAGAGAGAAAAAGAGAGAGGGGGAGTATGGCCATGTATTATAGAGTGTTTGGAATTAGCAATTGAATTTTCGAGGCGTACACGAGATGTATACGTACACGGTGTACGTAGCAGTGGCAGCGTGGAATCGAAGAACAAAGGAAGAGAAAATTCGATTGGGGGTGATGAAGGAAGGGGCGGGGAGCTCGTTACCATCGGCGGCGAAATTGAGGCGGCGGGGGCCGGGCGATCGGAGGAGAGGCGAGAAACGAGCGGAGATTTTCGCGGCGACGTTCCGTGTTGA
272	ADOR3B80518	NA	NA	NA	NA	NA	NA	NA	NA	NA	NA	NA	NA	NA	NA	NA	NA	NA	NA	NA	NA	NA	NA	NA	NA	NA	NA	NA	NA	NA	NA	NA	NA	NA	NA	NA	NA	NA	NA	NA	2	NA	NA	NA	NA	NA	NA	ATGACGCGGTTTCGCGGAATCCGCGGCTTGATTGGCAAAAGGCCGCGGACGGAGGGCCGAAGAGCGGAGGGGGAGGGGAAAGAAGAACGGAGGGCTGGTTTACGGGCGGCGCGAGAAGAAGAAGAAGAAGAAAAAGAAGAAGAAGAAGAAGAAGGAAGAAGAAGGAAGAGGAGGAGGAAAAGTGGAGTCGGAGTTCGATTGGGGGGGGAGGATGAGGAGAGGGATAGGCGGACGGTTCTGGGGATGGGCCAACGGAGTAACCGAAGAACTTATGAGGAGGAGAATTACGAGCGCGGCTACCTACCTAATATGCATAATAACGTCTGA
273	ADOR3B80533	NA	NA	NA	NA	NA	NA	NA	NA	NA	NA	NA	NA	NA	NA	NA	NA	NA	NA	NA	NA	NA	NA	NA	NA	NA	NA	NA	NA	NA	NA	NA	NA	NA	NA	NA	NA	NA	NA	NA	3	NA	NA	NA	NA	NA	NA	ATGGCCGGAGGCACGCGCGAAACTCCTGAATATTCAAAGAGAATTTATGGATCTTGTTCACCTTCTCTTCTTTATCGTATCTTTGAAATATTTTCAACGAGAATTGACTCTGATCCAGAGAAGAAGAAGCAGAAGAAGAAGCAGAAGAAGAAGAGGCAGAAGAAAAAGCAGAAAAAGAAAAAAAAACAGAAGAAGAAGAAGAAGAAGCAGAAGAAGAAGAAACAGAAAAAGCAGAAAAGAAGAAGAAAAAAAGCAGAAGAAGCAGAAGAAGAAGAGAAAGCAGAAGAAAAAGAGGAAGTAGAAGAAGAAGAAGAAGAAGAAGAAGAAGCAGAAAAAGAAGCAGAAGCAGAAGAAGCAGAAGAAGCAGAAGAAAAAGAGGAAATAGAAGAAGAGAAACAA…
274	ADOR3B80534	NA	NA	NA	NA	NA	NA	NA	NA	NA	NA	NA	NA	NA	NA	NA	NA	NA	NA	NA	NA	NA	NA	NA	NA	NA	NA	NA	NA	NA	NA	NA	NA	NA	NA	NA	NA	NA	NA	NA	2	NA	NA	NA	NA	NA	NA	ATGGATGGAGAACGTGAAAGAGAAGAGGAGGATGAGAAAGACCGTATGGAGACAGAAGAAAATGATAATAAAGAAATGAAGAAAATGACAAAAACAAGATGCAAAGAAAGGGTTGCTGGGCGAAAGGAAAAAATTAGAAAATGCCGAGAAAAAGGAGAAGATGAAAAAGAAGAAGAACATGTGACAAAAGAAATAGAAGAAGAAAAGAAAGATGACACAAGAGTGGAGAATGGTAAAGGATGGAGAACGAAAAAGGAAAGAGGAGAATGA
275	ADOR3B80539	NA	NA	NA	NA	NA	NA	NA	NA	NA	NA	NA	NA	NA	NA	NA	NA	NA	NA	NA	NA	NA	NA	NA	NA	NA	NA	NA	NA	NA	NA	NA	NA	NA	NA	NA	NA	NA	NA	NA	2	NA	NA	NA	NA	NA	NA	ATGAATAGTAATAGTAATAGTAATAGTACTAGTAATATTACTATAGTACTAGTACTAGTAGTAATAGTAATAGTAGTAGTTATTAATAGTAGTAGTAGTAGCAGTAGTAGCAGTAGTAGTAGTAGTAGTAGTAGTAGTAGCAGTAGTAGCAGTAGTAGTAGTAGCAGTAGTAGTAGTAGTAATAGTAGCAGCAGCAGCAGTAGAAGTAATAATAGTAGCAGCAGTAGTAGTAGTAGTAGTAGTAGTAGTAGTAATAGTAGTAGTAGTAGTAGTAGTAATAGTAATAGTAGTAGTAGTAAGAGTAGTAGTAATAGTAGTAAGAGTAGTAGTAATAGTAGTAGTAGTAGTAATAGTAATAGTAGTAGTAGTAGTAATAGTAATAGTAGTAATAATAATAAT…
276	ADOR3B80541	NA	NA	NA	NA	NA	NA	NA	NA	NA	NA	NA	NA	NA	NA	NA	NA	NA	NA	NA	NA	NA	NA	NA	NA	NA	NA	NA	NA	NA	NA	NA	NA	NA	NA	NA	NA	NA	NA	NA	1	NA	NA	NA	NA	NA	NA	ATGGTGGTAGTGGTTAGTAGTAATAGGAATAGTAATAGCGAAAGCAGTAATAGTGGTAGTAGTTGTAATAGCAATAATGGTAGTAGTAGTAATAGTAATGATAATAGTAGTAATAAAGTGAAAATAATAATAATAGTGATATCGATACTGAATGATAATAGCAACAACAATAGCTAA
277	ADOR3B80542	NA	NA	NA	NA	NA	NA	NA	NA	NA	NA	NA	NA	NA	NA	NA	NA	NA	NA	NA	NA	NA	NA	NA	NA	NA	NA	NA	NA	NA	NA	NA	NA	NA	NA	NA	NA	NA	NA	NA	1	NA	NA	NA	NA	NA	NA	ATGAGAAAAAGTAGAAGAAGAAGAAAAAAAGAAGAAAAAGAAGAAGAAGAAAAAGATGATGACGACGATGATGAAGAAGAAACAGAAAAAGAAAATGAAAAAGAAACAGAAGAAGAAAATGAAGAAAAAGAAAAAAGGAAATATGTATATAATTTCATCGTTAACGATTGA
278	ADOR3B80549	NA	NA	NA	NA	NA	NA	NA	NA	NA	NA	NA	NA	NA	NA	NA	NA	NA	NA	NA	NA	NA	NA	NA	NA	NA	NA	NA	NA	NA	NA	NA	NA	NA	NA	NA	NA	NA	NA	NA	1	NA	NA	NA	NA	NA	NA	ATGTCCCCGCAAATTGGCGCTCAAGAACCACGAATACGATCCCGCCATCTGGCCATGCCGGAAATTTTCACCGCGAAAAAGGTGGTCGACGACCGTCCACCACCATGTCATCACCTGTATCCGGATTTGTTCGAAAATCGAGATCGAGGTGGTCG
279	ADOR3B80556	NA	NA	NA	NA	NA	NA	NA	NA	NA	NA	NA	NA	NA	NA	NA	NA	NA	NA	NA	NA	NA	NA	NA	NA	NA	NA	NA	NA	NA	NA	NA	NA	NA	NA	NA	NA	NA	NA	NA	1	NA	NA	NA	NA	NA	NA	GTTTCTCCACGGTTACGCCACTCTCCGTGGTCTCCGTGTCTCGGCGTGGAGCACGATCATCGGATAGAAGGTGGCGAGAAGCGNNNNNNNNNNNNNNNNNNNNNNATCGATCGACCTCGTCCTCGGTCGAGAGAAGAAGAAGAAGAAGAAGAAGAAGAAGAAGAAAAAGAGGAGGAGGAGGAGGAGGAACCGTAA
280	ADOR3B80558	NA	NA	NA	NA	NA	NA	NA	NA	NA	NA	NA	NA	NA	NA	NA	NA	NA	NA	NA	NA	NA	NA	NA	NA	NA	NA	NA	NA	NA	NA	NA	NA	NA	NA	NA	NA	NA	NA	NA	1	NA	NA	NA	NA	NA	NA	CGAAGGGCGTCCGGGAAACCTTCGGACGGTGGTACGAAGCGAAGAGGAAGGGGAGAAGGCGAAGGCGAAGGCGAAGGCGAAGGCGAAGGAGAAGGCGAAGGAGAAGGAGAAGGCGAAGGAGCGAGGTGGAACGAGAAGTCAGAGCACTCAGCGTGGCTAA
281	ADOR3B80560	NA	NA	NA	NA	NA	NA	NA	NA	NA	NA	NA	NA	NA	NA	NA	NA	NA	NA	NA	NA	NA	NA	NA	NA	NA	NA	NA	NA	NA	NA	NA	NA	NA	NA	NA	NA	NA	NA	NA	2	NA	NA	NA	NA	NA	NA	ATGAGCGAGCGCGCGAACGTCCGGCCTCGTCAGCGTCTCGAAGGATGCTCGGCTCGGCCGTCGAGCTCCTCTGCTCGATCATGGGACGACGAAGACGACGACGAAAGTCGGTTGTCCCGTGGGAACCGGTGGAAAGTCACGCTCGCTGAAAAAGAACTCGGCGCCTCGCCAGCGGCCGCGCGCCGATTTTTCACCGTTCTCACCGAAACGTCGAGCCGAGCCGAGCCGAGGAGATCAAAGATAAGAGNAGAAGAAGAAGAAGAAGAAGAAGAAGAAGAGGAAGAAGAAGAAGAAGAAGAAGAAGAAGAAGAGGAAGAAGAATCG
282	ADOR3B80564	NA	NA	NA	NA	NA	NA	NA	NA	NA	NA	NA	NA	NA	NA	NA	NA	NA	NA	NA	NA	NA	NA	NA	NA	NA	NA	NA	NA	NA	NA	NA	NA	NA	NA	NA	NA	NA	NA	NA	1	NA	NA	NA	NA	NA	NA	ATGTGGCGAGTAGAAAGATCTCGGGGAATTGGAGAAAAAGCGAGTAAAAAAAGGCGGGCTATTGTAGGAATCGGGCTCGTCCTTGAGGAGAGGAGGAAGACGGTCCGGATGGAAGAAAGAAAGAATCGAGTAGGGGGGGAGGGGAGAGTAGTAGTCGGGAGGGAAGAGGGTCAGAGTCAGAGGGATGATGGTCGGGTAAACGAGAAAAAGAAACGAAGGGGCGAAGGAAAACGGGGGGGTTCCCGGTGGAAACGAACCCCTCGGGATGACCAGTGGGCAGCGGCCTCCTTCGGCGGCGTGTGTGTGCGCGTATCCGCCGAGGAAAGGCCACGCTGTGCACCCCCGTGCGATCCTCCTGGCTTCGCCCACACCCAGGATTTCGGGGGAGAATCCTTGAAA…
283	ADOR3B80585	NA	NA	NA	NA	NA	NA	NA	NA	NA	NA	NA	NA	NA	NA	NA	NA	NA	NA	NA	NA	NA	NA	NA	NA	NA	NA	NA	NA	NA	NA	NA	NA	NA	NA	NA	NA	NA	NA	NA	2	NA	NA	NA	NA	NA	NA	ATGGAAATACCTAGCCAGAGTAGGCTTGATCCGGCAAGAGTGATTTTTCTTGCTTCAAAAGAGAGGAAGAAGGAGGAGGAGGAGGAAGAGGAGGAGGAGAAGGAGGAGGAGGAGGAGGAGGAGAAGAAAAGAGAGGAAGAAGGAGGAGGAGGAGGAGGAGAAGTTGCCAACCGCCCACTTTGCAACCCCTCCTCGCAAAGGGAAGCGTCCCCTTTGTCCCTGGCGTACGCACACCGTTTCCAGGACAATCCCCCCGTCGTTTTCCAAGCTGCGCCACGGGGGACAAGGGCTCCTCGTGGAAAACGTGCTCCTCGTCTCGCTCCACGCGAAGAAAGTCGTCAAAGGGGTGGCGAGGACGTCCCACGTTTCGTGAAGACAACTTGCCTCCGAGGCAAGGTT…
284	ADOR3B80587	NA	NA	NA	NA	NA	NA	NA	NA	NA	NA	NA	NA	NA	NA	NA	NA	NA	NA	NA	NA	NA	NA	NA	NA	NA	NA	NA	NA	NA	NA	NA	NA	NA	NA	NA	NA	NA	NA	NA	2	NA	NA	NA	NA	NA	NA	ATGGGTGTATTCGACAAACACACGGAACACGGATACGTGTCTTTAAAAAGACACACCTTCTTAGCCTCGTCTCATAGACGCGAGCTGTCACGACTACACGGCCACCTAACTTCGTCAAGAGACGAAGTGATAAGCGTGAGGTTTTTGATAAAGCTGCTCGATTGTATAACGTTGAGACAAGTGGTAAGAGGAATCTTGGCAGCAAGAATTTGGTTGGTTAACTTCGTCAAGAGATTCAATGATAAGCGTGAGTTTTCTGAAGAAGCTGCTCAATTGTATAACGTTAAAAAAAAGTGTTTAAAAGATGCCAGATCGAATTTTGAGCAACTACAGAAGACCAGAGCAGAAGATCACGAAAAGAGGAATCTTGGCAGGCAAGAATTTCCAAGTTGTAGACTG…
285	ADOR3B80591	NA	NA	NA	NA	NA	NA	NA	NA	NA	NA	NA	NA	NA	NA	NA	NA	NA	NA	NA	NA	NA	NA	NA	NA	NA	NA	NA	NA	NA	NA	NA	NA	NA	NA	NA	NA	NA	NA	NA	2	NA	NA	NA	NA	NA	NA	ATGGCGATGCAACGAAAATATCGAGTTAAAGGGATGGCGAGGAATAACGAGCAAGAGGGAAGAGCGAGTATTACAACTGATGAAAAATTGGAACGTGGCCCTGGGAAAAATGCGGTTTCGAAGAGGAGGAAAACAGGGCAGGAAAGAGAGACAGAGACAGAGACAGAGACAAAAACAGAGACAGAGACAAAAATAGAGACAGAGACAAAAACAGAGACAGAGACAAAGACAGAGACAGAGACAGAGACAAAAATAGAGACAGAGGCAAAAACAGAGACAGAGATAGAGACAGAGATAGAGACAGAGACAAAAACAGAGACAAAGACAGAGAGAGACAGAGAGAGACAGAGACAAAGACAGAGACAGAGACAGAAACAAAAACAGAGACAAAGACAGAAA…
286	ADOR3B80593	NA	NA	NA	NA	NA	NA	NA	NA	NA	NA	NA	NA	NA	NA	NA	NA	NA	NA	NA	NA	NA	NA	NA	NA	NA	NA	NA	NA	NA	NA	NA	NA	NA	NA	NA	NA	NA	NA	NA	1	NA	NA	NA	NA	NA	NA	ATGGATGCTGTCTCTTCCCGTCCCTTCGAACGAATCTTTCGTGGTAGCGTGATACACGAATTAGGAGGTGTAGTTGTACGAAAACAAAGGAATTTTGGAGGAGGAATTGAAGCAAAAGTAAATAAAGAAAAAGGGATTGATATAGAGATATGA
287	ADOR3B80596	NA	NA	NA	NA	NA	NA	NA	NA	NA	NA	NA	NA	NA	NA	NA	NA	NA	NA	NA	NA	NA	NA	NA	NA	NA	NA	NA	NA	NA	NA	NA	NA	NA	NA	NA	NA	NA	NA	NA	1	NA	NA	NA	NA	NA	NA	CATAATAGTTTATATGGTATATCCAAAGACTGCACGAGAAAATAAAATGTTAATACAACAGAATACAGGATGGACCTGTAAGAGAGCAACTCCAGCTCCAAGAATAGAACGAAATAAAGATAAAATGTTACCACTACCAGTGGTCCAAGACCAAGTATACCGACGATAA
288	ADOR3B80598	NA	NA	NA	NA	NA	NA	NA	NA	NA	NA	NA	NA	NA	NA	NA	NA	NA	NA	NA	NA	NA	NA	NA	NA	NA	NA	NA	NA	NA	NA	NA	NA	NA	NA	NA	NA	NA	NA	NA	2	NA	NA	NA	NA	NA	NA	ATGAAGAGCGGATCCATGGATCCGGGAAAATTTAATTCCCCAGATTTTCCACCCTGCGAAACTCTGGTAACGCGAAAGCGGCTGGTGGAAAATACTCGCGAAACATCCGGGAGAGCCACCCGTGAAAATAGGATTCGTTGGTACGCCGCGTTTCTTGAATCGGCTGGGATTCTATTCAAAGAAAATGAAGAAGAAGAAGAAGAAGAAGAAGAAGAAGAAGAAGAAGAAAAAGCAGAAGAAGAAGAAGAAGAAGAAGAAGAAAAAGAAGAAGAAGAAGAAACAAAAAAAGAAGCAGAAAAAGAAGAAGAAGAAACAGAAGAAGAAGAAACAGAAGAAGAAGAAAAAGAAGAAGAAGTAGAAGAAGAAGAAGAAGAAGAAGCAGAAACAAAAGAAGAAGCA…
289	ADOR3B80606	NA	NA	NA	NA	NA	NA	NA	NA	NA	NA	NA	NA	NA	NA	NA	NA	NA	NA	NA	NA	NA	NA	NA	NA	NA	NA	NA	NA	NA	NA	NA	NA	NA	NA	NA	NA	NA	NA	NA	2	NA	NA	NA	NA	NA	NA	ATGGTGGTGATGATAGTAGTAGTAGTAGAAGTAGTAATAGTAGTAGTAGTAGCAGTAGTAGCAGCAGCAATAGTAGTAGTAGTAATAGTAGTAGAAGTAGTAGGAGTAGTAAGAATGACGACGATAATATTAATATTAATAACAATGATGATGATCATGATGATGATGATGATGATGATGATGATGATGATGATGATGATGATGATGATGATGCTGACGATGATTAATAATAATGATGATGATGGTGGTGGTAGTGGTGGTAATGATGATGATGATGACGACGACGACGACGACGACGACGACGACGACGACGACGACGACGATGACGATGACGATGATAATGATGGTGATGATGATGGTGATGGTGATGATGATGATGATAATGATAACAATAATAAT…
290	ADOR3B80608	NA	NA	NA	NA	NA	NA	NA	NA	NA	NA	NA	NA	NA	NA	NA	NA	NA	NA	NA	NA	NA	NA	NA	NA	NA	NA	NA	NA	NA	NA	NA	NA	NA	NA	NA	NA	NA	NA	NA	2	NA	NA	NA	NA	NA	NA	ATGGAAAGGGAAAAAGAATCTGTTAGGCTGTTTGCTGTTTTTTTTTTGGAGAATATAGGAAATGGTTATAATTATACGAAGTATGGAAATACTTATGGATGTTTTTTGGATAGTTTTGATCATACTGCTTCCTCGAGAAGCAAGAATTCTTTTTATAGAGTGTCTCTATGA
291	ADOR3B80609	NA	NA	NA	NA	NA	NA	NA	NA	NA	NA	NA	NA	NA	NA	NA	NA	NA	NA	NA	NA	NA	NA	NA	NA	NA	NA	NA	NA	NA	NA	NA	NA	NA	NA	NA	NA	NA	NA	NA	1	NA	NA	NA	NA	NA	NA	ATGACAGAAAAGGAAGGAGATCCTATAGATCCCGTGGTGAAGATAGCACCGAGGCGAGAACAGTGTACGCAAATTTTTCGAGAATGTAAACGCGAGGAGTTAAGAATCGCGTGGACGGAAGTAAAAAAAGAAAGAAAAAAAAGGATGGAAAGAGATAAAAGAAGAATGATTTTTCTAGGGCTATGTGCAGCTGGAAAACGACACCGAGGAGAGAGACAACGTCTGTGA
292	ADOR3B80619	NA	NA	NA	NA	NA	NA	NA	NA	NA	NA	NA	NA	NA	NA	NA	NA	NA	NA	NA	NA	NA	NA	NA	NA	NA	NA	NA	NA	NA	NA	NA	NA	NA	NA	NA	NA	NA	NA	NA	2	NA	NA	NA	NA	NA	NA	ATGAGTCACTCGACGACGAGAATTAAGAAACAAATGGCCCTTATTCCGTTCGAGCTATCGATCTCGCGGGCCATCTTAATTCCTCGCCTTCCAATTAAGCCTCCTCCTTCCTCGAAGGCGACCCGCCGCTCGGACAGACGGAACTTCGCCGAATTATATGGGCCATTGCTCTTTGGATCTTTGTACAGCGGGGAACAAGCTCATACATCCTTCTACATATTTACGTTACCAGAAATTTATCCAAACGAATGTGGTNNNNNATATCACGAAGTAGTATCTTGGAGCTCAAAACTACACTTAATTTTTCAATTTCAATTAGCTCATACATCCTTCTACATATTTACGTTACCAGAAATTTATCCAAACGAATGTGGTTTATATCGCGAAGTAGTATCTTGG…
293	ADOR3B80620	NA	NA	NA	NA	NA	NA	NA	NA	NA	NA	NA	NA	NA	NA	NA	NA	NA	NA	NA	NA	NA	NA	NA	NA	NA	NA	NA	NA	NA	NA	NA	NA	NA	NA	NA	NA	NA	NA	NA	2	NA	NA	NA	NA	NA	NA	ATGACACATTGGGACGACGATGGGCCGGCAGAAAACGAGCGGGATCTTGCGCAACGAGAGAGTTACAGTTATAGCGTCGCCCTCCTCGAAACTGTGCCCCACCTCAATAAGGGATATTCGCAAATTCTGTTTGCGCCATTGGCAAGCCGACGCGGTCTTGCCCGTGAGAGCAAACCAGCCAACTGGGAAGATACATCGCCCTTGGAAATTGGAATACCACGGGATCCAACAACATCTTCTACGGAATCTCCATGGAAGCGCGGATAA
294	ADOR3B80629	NA	NA	NA	NA	NA	NA	NA	NA	NA	NA	NA	NA	NA	NA	NA	NA	NA	NA	NA	NA	NA	NA	NA	NA	NA	NA	NA	NA	NA	NA	NA	NA	NA	NA	NA	NA	NA	NA	NA	1	NA	NA	NA	NA	NA	NA	ATGAGTGGAAGCCTCGAAGCGGAGAGCGTTGCAGCGCGACGATGGAGGATACGACGCGAGGAGAAACGTGAGAAATTGTGGAAACGAAGAGATGAATCGTATTTGGTATCGAAGAGAATTGTTGGAAATGGTTTAAACGGTGGTTTGGAAGAAGTAGTAAGTGGAAGATCAAAGGAGTGA
295	ADOR3B80632	NA	NA	NA	NA	NA	NA	NA	NA	NA	NA	NA	NA	NA	NA	NA	NA	NA	NA	NA	NA	NA	NA	NA	NA	NA	NA	NA	NA	NA	NA	NA	NA	NA	NA	NA	NA	NA	NA	NA	1	NA	NA	NA	NA	NA	NA	ATGTCAAAGAACCGTATAAATCGCGGCCATATACCCGAAGAGGAGGAAAAAGAGGAAAAGGAGGAAGAGGAGGAGGAGGAGGAGGAAGAGGAAGAAGAAGAGGAGAAGGAAGAAGAAGAAGAAGAAGAAGAAGAAGAAGAAGAAGAAGGTTGGTAG
296	ADOR3B80638	NA	NA	NA	NA	NA	NA	NA	NA	NA	NA	NA	NA	NA	NA	NA	NA	NA	NA	NA	NA	NA	NA	NA	NA	NA	NA	NA	NA	NA	NA	NA	NA	NA	NA	NA	NA	NA	NA	NA	1	NA	NA	NA	NA	NA	NA	ATGGAGGCAGACGCTACTTACTTGCGCAGTTATTTCGGCAACCCCGCCGCCTATAATCTTCGCAGATTACCGCGAACCGGGGGAGGAGGAAGAGGGGAGGAGGAGGAGGAGGAGGAGAGGGGTGGAACGACGCGGTTTTACGCGGTCGATGCGACAACGTTTCGTCAACTGTACAACGCGTGTTGTACCGCCGGAGAGAAATTATACTTTTCGCTTCCTCCTCGAACTGGTGAATACCGGGTGAACGATAAATCGAAAATCGAGAGGAATTTCCAGGAGAAATCCGGCGGAGGTGAAATAGAAGAAGTAGAGAGCGTTCATCGAGAGAGAGGATCGATAACGTTTCCCCTTTTACTTTTGGGGAAATGA
297	ADOR3B80658	NA	NA	NA	NA	NA	NA	NA	NA	NA	NA	NA	NA	NA	NA	NA	NA	NA	NA	NA	NA	NA	NA	NA	NA	NA	NA	NA	NA	NA	NA	NA	NA	NA	NA	NA	NA	NA	NA	NA	1	NA	NA	NA	NA	NA	NA	ATGGATGGTATTCACGTTGAGGATTACGACAACAGTATTGTAGCCGAATGCATATCTGCGACGAGCACAGGAAGAAGCTTTGAAGTCATTACAAGACTACCGGAACCGGATTATCGAGACACGATTTTAGGAATAAATTATGTTGCTCTAAAATTTCATTGA
298	ADOR3B80661	NA	NA	NA	NA	NA	NA	NA	NA	NA	NA	NA	NA	NA	NA	NA	NA	NA	NA	NA	NA	NA	NA	NA	NA	NA	NA	NA	NA	NA	NA	NA	NA	NA	NA	NA	NA	NA	NA	NA	1	NA	NA	NA	NA	NA	NA	ATGAGATTGCAGCCGATTTTCTCGATGCGGCTGAAGAAACTTGCTTACGAAACGAGTCGTGCGATCGGGATCGGAATCGGAATCGGAATCGGAATCGGAATCGGAATCGTCTCGATCGGGACGGGAAATGGAATAGATAGTTGGATTGCGCGGAAGAAATCAATTAATCCACGAGTCTGGCCGGCCGGTTTTACGGCGAAGGGAAAGGAATTAATCGTTTCGTGGAAACGTCGCGCGCAAGGTGCAGCTGCGATCGTGTTATAG
299	ADOR3B80667	NA	NA	NA	NA	NA	NA	NA	NA	NA	NA	NA	NA	NA	NA	NA	NA	NA	NA	NA	NA	NA	NA	NA	NA	NA	NA	NA	NA	NA	NA	NA	NA	NA	NA	NA	NA	NA	NA	NA	3	NA	NA	NA	NA	NA	NA	ATGACACTTTGCATCGCGATTTCAATTATCGAATTGGATCAAAAAGAATGTACTCGAAATTGTGACAAGAAGTCGAAACATACCAGAGAACAAGACACGAATGTGAACCACCAATTTTCTGAAAAGAAAATATTGATTGCATTTTTTTTAAATAAGAGCTATTTTTTGACAAGAGTGTTGAATTTTATGCCAAAGTTTATTGGATTAATTATCTATTAA
300	ADOR3B80673	NA	NA	NA	NA	NA	NA	NA	NA	NA	NA	NA	NA	NA	NA	NA	NA	NA	NA	NA	NA	NA	NA	NA	NA	NA	NA	NA	NA	NA	NA	NA	NA	NA	NA	NA	NA	NA	NA	NA	1	NA	NA	NA	NA	NA	NA	ATGAAAGGAAAGTTACCTTTTTCTCGAGGTATGTTCGGTCGTTCGATAAATAAAGGGTGCGCCATCCCTTGGTTTAAGTTAGCACCGTCTCGCGACAATAAGAAGAACGAGGATCAATGTTCAGGTCCATTGGTAAATGAAGACGAAAGGGTTTGGGGATTTTGTCTTTCCGTGTGCAGGATGAAGAAGAAAGGTGGTGATGGAATAGGAGGAGAGAAGAGAGAAAGGGAGGATAAGGTTGGAATGAATAAG
301	ADOR3B80676	NA	NA	NA	NA	NA	NA	NA	NA	NA	NA	NA	NA	NA	NA	NA	NA	NA	NA	NA	NA	NA	NA	NA	NA	NA	NA	NA	NA	NA	NA	NA	NA	NA	NA	NA	NA	NA	NA	NA	2	NA	NA	NA	NA	NA	NA	ATGGATTATAGTACGGATAGTATGGATGGTAAAGCATTTGCAGTTGATATTGATTTCTTTGAACAAATAATGTCTAAACATCGATTTATTTCACGATTTGCTGCACATAATAGACATACTGTCATGTGTGACAGTATAAGTATACTTGTGCCATCGAGAATAGTGATCTATTCGACTATATTATGA
302	ADOR3B80677	NA	NA	NA	NA	NA	NA	NA	NA	NA	NA	NA	NA	NA	NA	NA	NA	NA	NA	NA	NA	NA	NA	NA	NA	NA	NA	NA	NA	NA	NA	NA	NA	NA	NA	NA	NA	NA	NA	NA	1	NA	NA	NA	NA	NA	NA	ATGATGATGATGATGATGATGATGATGATGATAACAACAACAACAATAACAACAATAACAATAATAACAACAACAACAATAACAACAATAACAATAACAACAATAATAACAACAACAACAATAACAATAGCAATAGCAACAACAACAATAATAACAATAACAATAGCAATAGCAATAGCAATAACAATAACAACAACAACAACAATAATAATAATAATATTGATATAA
303	ADOR3B80682	NA	NA	NA	NA	NA	NA	NA	NA	NA	NA	NA	NA	NA	NA	NA	NA	NA	NA	NA	NA	NA	NA	NA	NA	NA	NA	NA	NA	NA	NA	NA	NA	NA	NA	NA	NA	NA	NA	NA	3	NA	NA	NA	NA	NA	NA	ATGTTTGTCTCACGTCGTGTAACGATCGTCGAATCGATTGAATTTGGAGATCGAAAAAAAAAAAAAAAAAAGAAAGGAAGAAAAAATAGAATCGAAAAGAATGGTAAAATTCGGGTCAGTCGATTGGTTGACACCAATTTGGGAAGATATTATCCACAGGGAATAGGAAGGGAGCGGAATAAGAAGGCAAGAAGGGAGGAGGAAAAGGGAGGCGAAGAGGACATCGTTTTTACACCGTCGAAACCAAATGGGGGAAAAAGTTGGGTAACTGTTGGAGAAACAACAAGACAATGGACGAGTAAAAAAAGTTTAACGCGAGAGGAGGAGGAGAAAACAAAACGAGGGGAACGATGCTTGTTCGAGCCATGGCTCGCGATTTCGTCGACCGATAAGCGGCGA…
304	ADOR3B80691	NA	NA	NA	NA	NA	NA	NA	NA	NA	NA	NA	NA	NA	NA	NA	NA	NA	NA	NA	NA	NA	NA	NA	NA	NA	NA	NA	NA	NA	NA	NA	NA	NA	NA	NA	NA	NA	NA	NA	1	NA	NA	NA	NA	NA	NA	ATGCAACGGGCACGAGAGTTCGTACAGATACGATATCCAGGTGAAAAAAAGCACGATCTCGAATATACGAGATGGATAGGATATGAAGACTTACGAGGAGAAATACGAGCATTATGCGGGAACAATGGTGTGATCGAGTACGAGCAACGCGGCACGGAAACGCAAATGATCCGCTGA
305	ADOR3B80705	NA	NA	NA	NA	NA	NA	NA	NA	NA	NA	NA	NA	NA	NA	NA	NA	NA	NA	NA	NA	NA	NA	NA	NA	NA	NA	NA	NA	NA	NA	NA	NA	NA	NA	NA	NA	NA	NA	NA	3	NA	NA	NA	NA	NA	NA	ATGGATATTTGTCAGGGGCGAGAAGAAAACGAGACGGTATCAGAATTTGAGGAATCGGTGAAGCCGGTAATCACGGTGCTACGAAACGTTAGGAAGATAAAGAAAAAGATAACTAAAAGAAAAAAGGGGAAAAAACAACAACGAAAAACAGACCTCAGCCAAGATGACAGCCATAGTGACAGATCTAGTGCACGGGTACAGGGATCTGATGGATAA
306	ADOR3B80719	NA	NA	NA	NA	NA	NA	NA	NA	NA	NA	NA	NA	NA	NA	NA	NA	NA	NA	NA	NA	NA	NA	NA	NA	NA	NA	NA	NA	NA	NA	NA	NA	NA	NA	NA	NA	NA	NA	NA	1	NA	NA	NA	NA	NA	NA	ATGCATCTTAGTCCGAGTTTGGTGACAGCCATGGCAATAGGAATATTATTTTCAAGGTTTTTGAGTTTTCGACTTTTATTTCGTAAAGAAATTGACGATGGAGAGAAGGAAAGAAGTGGTGAAGATAGAGATGAAGTAAAAGGTGTGGAAATAAGAATAACAGATAAATAA
307	ADOR3B80725	NA	NA	NA	NA	NA	NA	NA	NA	NA	NA	NA	NA	NA	NA	NA	NA	NA	NA	NA	NA	NA	NA	NA	NA	NA	NA	NA	NA	NA	NA	NA	NA	NA	NA	NA	NA	NA	NA	NA	1	NA	NA	NA	NA	NA	NA	ATGGAGATGGGAACGAAACGGGACGACGATCGCGACCGGGACCGAGATGATTATGACGAAGAGGAGAAAGAAGAAGAAGAAGAAGAAGGAGGAGGAGGAGAAGGAGAAAGAAAAGGAGGAGAAGAAGGAGAAGAAGAAGAAGAAGAAGAAAGGGAAGAAGAATAA
308	ADOR3B80727	NA	NA	NA	NA	NA	NA	NA	NA	NA	NA	NA	NA	NA	NA	NA	NA	NA	NA	NA	NA	NA	NA	NA	NA	NA	NA	NA	NA	NA	NA	NA	NA	NA	NA	NA	NA	NA	NA	NA	1	NA	NA	NA	NA	NA	NA	ATGAGCGAGACCGTGAGCGATAACGCAGAGAAAGAGAATGAGGGCTCCTTCGAGGGAGAGAGTGTTTGCTTCGAGGGGTGGAGAGAGGGAATAGAGGAAGCGGAGCGTGAGAAGGAGACGGAAGAAGAAGAAGAAGAGGAAGAAGAAGAGGAGGAGGAGGAGGAGGAAGAAGAAGAAGAAGAAGAAGAGGCAAAAGAGGAAAGGAGGAAAGAGTAG
309	ADOR3B80728	NA	NA	NA	NA	NA	NA	NA	NA	NA	NA	NA	NA	NA	NA	NA	NA	NA	NA	NA	NA	NA	NA	NA	NA	NA	NA	NA	NA	NA	NA	NA	NA	NA	NA	NA	NA	NA	NA	NA	1	NA	NA	NA	NA	NA	NA	ATGGAAGGCCATCGGTCTCCGGCGGACAGCGAGCATGGTGGTATCGCTCCGACGATATCAACGTCGCCTCCCGCACCGGCTATATCAATATTATGCTTACTCCTTCTTTTCTCCGTAAAACGTGCCCCAACGGGAGAAACTGTTGCGTCTGCACGCGGCCACGGACCGGATACGGACTACTACTCTACTACACGGGTCGAGCACACTAGCTCGCTTTTTCGCGAATTAATGGGGTGGGGTTTCGCCGTGCTCTCGAATTCTGGAACCTTCTGGGAGGGGGGGGACCCTATTGTCTCGCGATCTCGCGAGATGATTTATTCGCAGCCTGCTCGTACGTTGCTCAACTCCCATTTCAAACTCGCCGCGATCTCATCGTGCGTGCGGCATCTAGACGCCTCG…
310	ADOR3B80730	NA	NA	NA	NA	NA	NA	NA	NA	NA	NA	NA	NA	NA	NA	NA	NA	NA	NA	NA	NA	NA	NA	NA	NA	NA	NA	NA	NA	NA	NA	NA	NA	NA	NA	NA	NA	NA	NA	NA	1	NA	NA	NA	NA	NA	NA	ATGACACGACGACGAAGAGGAGAAGAAAGAAGAAGAAGAACAAGAAGAAAGAAGAAGAAGAAGAAGAACAAGAAGGAAGAAGAAGAAGAAGAAGTAGAAGAAGAAGAAGAAGAAGAAGATCGAGCACGAAAAGAAAGAGCGGAGAATGGAGCGAGAGAAGGAGGAGAGGGTAAAAGAAGAGCGTCTCAGGGCGTAAGAGAGAGGGGAAGGGGAAGAGGTTGGAGGGAGGAGGAGTGCATAGGGGGAGGGCAAAGAGGGAACCGGGAGAGTATAGAGGTATATGAGAAAACAATAGAGCTGATTTGCAAACAATAG
311	ADOR3B80741	NA	NA	NA	NA	NA	NA	NA	NA	NA	NA	NA	NA	NA	NA	NA	NA	NA	NA	NA	NA	NA	NA	NA	NA	NA	NA	NA	NA	NA	NA	NA	NA	NA	NA	NA	NA	NA	NA	NA	1	NA	NA	NA	NA	NA	NA	ATGGGTGGACAATCCCCCCAGGTTGACTCGGTCACGTGCTTTTCCTCCCTAATCACCCACCACGATGTCAACAACGCGGGACCGAGAGCTGTTCAACCATTTCACCCATTTCACCCGTCCCATCTAGCTCGTGGAAACACTTTCCCACACAGTTTGGAGAACCTGAAAAGCGACGAGAGGTGGGGCTCTCCTCCTTTCCGACCTCTCGTTCCACCTAACATTCAACCCTCTCTTTTAAAACCCCAAAGATTTGGGAAATTGTTGGCCACTGTAACTTTGGGTGGAAAGAGTGGTGCTCGACAGGTGTTCATCGTTGTTTTTTCTAAGGAAGAAGGAACAATGACTGGATTGGCTTGGCTTGGACCTGTAAAATGTGAAAATGGATTTCGAAATACGTGT…
312	ADOR3B80752	NA	NA	NA	NA	NA	NA	NA	NA	NA	NA	NA	NA	NA	NA	NA	NA	NA	NA	NA	NA	NA	NA	NA	NA	NA	NA	NA	NA	NA	NA	NA	NA	NA	NA	NA	NA	NA	NA	NA	1	NA	NA	NA	NA	NA	NA	ATGTGGCCAAATTGTATTCTAATATATGAAGACAGCAGATTATTATTGGATTCAAACAACAATCAAGGAGAAGTAGATCAGCATACTTCAGCTGAATTAGATGACAGAGAGGCGCAGACATTTTACGGAGTTAACGTCAATGTTATATATTATGGAATAACTTAA
313	ADOR3B80785	NA	NA	NA	NA	NA	NA	NA	NA	NA	NA	NA	NA	NA	NA	NA	NA	NA	NA	NA	NA	NA	NA	NA	NA	NA	NA	NA	NA	NA	NA	NA	NA	NA	NA	NA	NA	NA	NA	NA	1	NA	NA	NA	NA	NA	NA	ATGGAGGAAGCTTTAGAAGATACTACCGTTTTGGAGAAAGAACTTTTAGAACTACCAGAATTTCCAGAAACTAGAACTGAGCTTTCAAAATTTTCAGAATTTTTAAAACTTACCAGAACATTAGAATCATTCGAACTCTCAGAATTTCTAGAACTACCAAAATCTTCAGAACACCGTCTGAATCTTCAAGAACTTTTTGAACTTAGAATTCTACCGAACTTATAA
314	ADOR3B80786	NA	NA	NA	NA	NA	NA	NA	NA	NA	NA	NA	NA	NA	NA	NA	NA	NA	NA	NA	NA	NA	NA	NA	NA	NA	NA	NA	NA	NA	NA	NA	NA	NA	NA	NA	NA	NA	NA	NA	1	NA	NA	NA	NA	NA	NA	ATGTCCTGTAGCCGGATACAAGAAAAGATATGGTCGAAGATATGCAGGGCGAGGCCAAGTAGCTATGGTACCATGATTATGCCTTGTGACATTGCCATGTTCAGGCCAAAAACGGGCCCAATATTGGTTAGGCAAAATTATCCGACACCGATACACGAGAGCCCGGAAAAGAAAAATCTCCAACCAGGCAAGAATCGATGA
315	ADOR3B80829	NA	NA	NA	NA	NA	NA	NA	NA	NA	NA	NA	NA	NA	NA	NA	NA	NA	NA	NA	NA	NA	NA	NA	NA	NA	NA	NA	NA	NA	NA	NA	NA	NA	NA	NA	NA	NA	NA	NA	1	NA	NA	NA	NA	NA	NA	ATGGAACAGAGGGAGCAGAAGATCCAACAGGAATGGCAAGTGATACTCGGTTACCGACGGTTGATAAAATCGACTGATTCTTGCATAGAAATGATTTCGGTTCCGAAACGAGAAGTGATCGATGAAACGATTTCCAATCGGTTCGTAGCAATTCCTGAATGTGTTACTCCGCCACGTGGCTCAATTGAAACGGAAAATCATTTTTTAGTCCTAGCAGGATTGGTATATGGCTGTAGGGTTAACTGGATCCGTGAATTGTGGACAGGCATGTAG
316	ADOR3B80843	NA	NA	NA	NA	NA	NA	NA	NA	NA	NA	NA	NA	NA	NA	NA	NA	NA	NA	NA	NA	NA	NA	NA	NA	NA	NA	NA	NA	NA	NA	NA	NA	NA	NA	NA	NA	NA	NA	NA	2	NA	NA	NA	NA	NA	NA	ATGACCCACGACAAGCCATTCGTACAAGTATCCCTGTTCTTCCTGCCAGGTGGGGATAGTTACCCTACGCAGGGTAAACTCATGGCTGGCAAATTTGTCCGTCAATTCTATCATACTTCTCGAGGCAGCAACACGCAATCAAACGGTGACAGTATCGGAGATAATCAGGAAGAAATTTTAAAACAACGATCAATGATACGACGAACAATGATACATCAGTGA
317	ADOR3B80857	NA	NA	NA	NA	NA	NA	NA	NA	NA	NA	NA	NA	NA	NA	NA	NA	NA	NA	NA	NA	NA	NA	NA	NA	NA	NA	NA	NA	NA	NA	NA	NA	NA	NA	NA	NA	NA	NA	NA	1	NA	NA	NA	NA	NA	NA	ATGGATAGCCAAAGGAAGCATTTGCAGTGTTATGGTTTATTGCTTTACAAAGGTGAGAGCGCAAATAATATGACAGTGGAGCTGCGACGATCATTCGCATTCAAGAGATTTAGAGCTGGCAATTTAGAGTCGAAAGACAAAGACTGCAGCAGTGATGGAAACGGATCTCATCGAAGTCAACGTGCATCGAAAACGCACGTTGATTTTAAAGACGATAGGTCTTCGATCATCGCGAAGCTTGCACTTCTTTCGGTGGAATTGGAAAGGTGTAGTCTACTATGA
318	ADOR3B80858	NA	NA	NA	NA	NA	NA	NA	NA	NA	NA	NA	NA	NA	NA	NA	NA	NA	NA	NA	NA	NA	NA	NA	NA	NA	NA	NA	NA	NA	NA	NA	NA	NA	NA	NA	NA	NA	NA	NA	1	NA	NA	NA	NA	NA	NA	ATGGAGCGTTGCTCCCAAGTACGCGTGTGTTTAACATGGTGTAATCTTTTCCTCCCTCGATTCGACGAGTTCTCTTCTAGCAGGCGACGAGAAACGTTGGCACGTTTGGTAAAAGCAGGTGTTGCTGCCGGCTGTTTTCGTCCGCATGACAAAACTCTGACGGCGTTGGTCGAAAGTGCAACTCTCCCAGAGATGCATAACAGATATGACGAGGCGAATCGAGATAAAGGCGTTTTCGGTGTTTGGCTTTTCGAATGTATTATACCTGGCAATAGATAA
319	ADOR3B80864	NA	NA	NA	NA	NA	NA	NA	NA	NA	NA	NA	NA	NA	NA	NA	NA	NA	NA	NA	NA	NA	NA	NA	NA	NA	NA	NA	NA	NA	NA	NA	NA	NA	NA	NA	NA	NA	NA	NA	1	NA	NA	NA	NA	NA	NA	ATGGTTGCCGAAATTCCAGGGGATCGTTTAACAATTTCCAAGAGGACAACGTCGAGTATCCAACTCCGACAATCGGTCAAAAAGCAACACGAAGAGACCGAAGAAGAATCACCACCACCACTACCATCATCATCATCATCATCATCAAAAGAAGAAGAAAAAGAAGAAGAAGCAGAAGAAGAAGAAGAAGAAGAAGAAGAAGAAGAAGAAGCTTCTTGA
320	ADOR3B80868	NA	NA	NA	NA	NA	NA	NA	NA	NA	NA	NA	NA	NA	NA	NA	NA	NA	NA	NA	NA	NA	NA	NA	NA	NA	NA	NA	NA	NA	NA	NA	NA	NA	NA	NA	NA	NA	NA	NA	1	NA	NA	NA	NA	NA	NA	ATGATAAGAAAAAAAATAATAATTGCAATTGATGATGATGAAGATGATGAAGATGATGAAGATGATGATGGTAATGGTGGTGATAATGATAATGATAATAATAATGATAATAATGATGACGACGATGATGATGATGATAAAATAATAATAAAATAA
321	ADOR3B80882	NA	NA	NA	NA	NA	NA	NA	NA	NA	NA	NA	NA	NA	NA	NA	NA	NA	NA	NA	NA	NA	NA	NA	NA	NA	NA	NA	NA	NA	NA	NA	NA	NA	NA	NA	NA	NA	NA	NA	1	NA	NA	NA	NA	NA	NA	ATGACTTGTACTCGATACCGATGGAATTGGAAAAGTAAAAGACCGTTTCCTCGAGATGATGACGAAGAAGAAGAAGAAGAAGAAGAAGAAGAAGAAGAAGAAGAANAAGAAGAAGAAGAAGAAGAAGAAGAAGAAGAAGAAGAAGAAGGAGGAGGAGGAGGAGGAGGAGAGAAAGAGGAGAATGATGCGGAGGAGGAAGAGTTGGCCTAG
322	ADOR3B80917	NA	NA	NA	NA	NA	NA	NA	NA	NA	NA	NA	NA	NA	NA	NA	NA	NA	NA	NA	NA	NA	NA	NA	NA	NA	NA	NA	NA	NA	NA	NA	NA	NA	NA	NA	NA	NA	NA	NA	1	NA	NA	NA	NA	NA	NA	ATGATGGTTATGATGATGATGATGGTAGTAATGATGGTGCTGGTAGTAATGATGATGATGATGATGATGACAACGATGATAATAATAATGATGATGATAATGATGATAATCATAATAATAATAATATTTAATAGTAATAATAATAGTAATAGTAATAATAATGATGATGATAATAATAAAAATAATAACAACAACAATGATGACGATGATAATAATAATAATAATAATAGTAATAGTAATAGTAATAGTAATAGTAATAGTAATGATGATGATGATGATGATAATGCTGATATGATAATGATGATAGTGATGATAATGATGATGATGATGATTATGATAATTTGA
323	ADOR3B80927	NA	NA	NA	NA	NA	NA	NA	NA	NA	NA	NA	NA	NA	NA	NA	NA	NA	NA	NA	NA	NA	NA	NA	NA	NA	NA	NA	NA	NA	NA	NA	NA	NA	NA	NA	NA	NA	NA	NA	1	NA	NA	NA	NA	NA	NA	ATGACAATGGCAATGGAAATGACAATGACAATGGCAATGACAATGGCAATGGCAATAGCAATGACAATGACAATGACAATGACAATGGCAATGACAATGACAATGGCAATGGCAATGACAATGGCAATGGCAATGACAATGACAATGACAATGGCAATGGCAATGATGATAATAATGACAATAACAATAATGATAATAATAATGATGATAATAATAATGATGATGATGATGAAGATGATAATAATAATAATAATAATAATAATAAAAAATAATAATAAAAAATAA
324	ADOR3B80934	NA	NA	NA	NA	NA	NA	NA	NA	NA	NA	NA	NA	NA	NA	NA	NA	NA	NA	NA	NA	NA	NA	NA	NA	NA	NA	NA	NA	NA	NA	NA	NA	NA	NA	NA	NA	NA	NA	NA	1	NA	NA	NA	NA	NA	NA	CCGATATTACACGACGACGCCCGGGGGAAGAAGATCCGCTTCGTTCTTCTCTTCGTTCCACGATCGTTATTCTTTCTCTCGAGGAGAAGAGAAGAAGAAGAGGAGGAGGAGGAGGAAGAGGAGGAAGAAGAGGAGAGAGAAAACGAGAAACGTTTCG
325	ADOR3B80942	NA	NA	NA	NA	NA	NA	NA	NA	NA	NA	NA	NA	NA	NA	NA	NA	NA	NA	NA	NA	NA	NA	NA	NA	NA	NA	NA	NA	NA	NA	NA	NA	NA	NA	NA	NA	NA	NA	NA	1	NA	NA	NA	NA	NA	NA	ATGGCGAACGATCATCGCGTACGACCCGCGCCCGTCTCTCCAAGTCGCGGCAATTTTTCGAAAAGTATGCCAGCTAGCGAACCACGACGAGGTTCCGCTTCTTCTCAGCTCGTTATTTTTACGAACTTGTACATTTGTGATCCAGAAATAACGGAAATAAAGGGAAGACGCATTGCACCCTGTGGCTGA
326	ADOR3B80947	NA	NA	NA	NA	NA	NA	NA	NA	NA	NA	NA	NA	NA	NA	NA	NA	NA	NA	NA	NA	NA	NA	NA	NA	NA	NA	NA	NA	NA	NA	NA	NA	NA	NA	NA	NA	NA	NA	NA	1	NA	NA	NA	NA	NA	NA	ATGGAAGAGGAAGAGGAACCCCCTTTATCGATTTCTCGAGCGATAAAGAAAAGAGAAAGAAAGAAAGACCACTTTTTCATTCCACCAGTCTTCGGGGACTGGTCTTGGAGAGAAGTTAGAGAAGCTACAAGTTTCAAGAGCGTCGGAAGTCAATAG
327	ADOR3B80948	NA	NA	NA	NA	NA	NA	NA	NA	NA	NA	NA	NA	NA	NA	NA	NA	NA	NA	NA	NA	NA	NA	NA	NA	NA	NA	NA	NA	NA	NA	NA	NA	NA	NA	NA	NA	NA	NA	NA	1	NA	NA	NA	NA	NA	NA	ATTTTAGACGGCAAGGTGAAAGAAGAAGGAGAAGAAGAAGAAGAAGAAGAAGAAGAAGAAGAGGAGGAGAAGGAGGAGGAGGGGATTAGATTAACGAAAGTAAGGGAAAGGGTGGAGGAAGCGAGAGAGAACGGAGCGCGGAGCGACGGTG
328	ADOR3B80954	NA	NA	NA	NA	NA	NA	NA	NA	NA	NA	NA	NA	NA	NA	NA	NA	NA	NA	NA	NA	NA	NA	NA	NA	NA	NA	NA	NA	NA	NA	NA	NA	NA	NA	NA	NA	NA	NA	NA	1	NA	NA	NA	NA	NA	NA	ATGGCCGGCCATTGGCAATGGATATGCTCGACGTGCATTGCAATTTACGATCTAATCGCGGCTAAAGTTCAGGGATGTGCACACGTGTCTGGTGCACCCTCAGGCGACCACCCTCAAATCATTAAAAATATAGCAACCAGAGTTGTAATG
329	ADOR3B80956	NA	NA	NA	NA	NA	NA	NA	NA	NA	NA	NA	NA	NA	NA	NA	NA	NA	NA	NA	NA	NA	NA	NA	NA	NA	NA	NA	NA	NA	NA	NA	NA	NA	NA	NA	NA	NA	NA	NA	4	NA	NA	NA	NA	NA	NA	ATGGCTCACTCGTCTCACCGAGTCACCGCGAACGCCAACGCAACCGACCACTGGGAGAACAACACCGCGGAACAAGAAGCGTGTCGCGATCACGCGACAGACAAATCGATGAAAAAGAGAGCGATCGCGTTGCACGCACTTCCGATCGACTTCTGTCTTCCAACCGTCCAAGCGAAGCGTGTCCGAACTAGCAAGATGTGGCGAAGATGTGTTCCCGTTGGATGTCCACTACGTTCCCGTGTACCAGTGGCGAAGGCGAAGGAACACCACGACGACGACCACGACGACGACGACGACGACGACGACGACGACGACGATGACTACGACGACGACGACGACGACGACGACGACGACGACGACGACGACGGCGACGACGACGACGACGACGACGGCGACGAC…
330	ADOR3B80958	NA	NA	NA	NA	NA	NA	NA	NA	NA	NA	NA	NA	NA	NA	NA	NA	NA	NA	NA	NA	NA	NA	NA	NA	NA	NA	NA	NA	NA	NA	NA	NA	NA	NA	NA	NA	NA	NA	NA	2	NA	NA	NA	NA	NA	NA	ATGTTCCGTTGGGGTGTGAAAAGGTTTTGGTTTTCTCACGCGAGTAAGGAATGTGTGAGGTTTAATGGAATAGGTGGAAATTTTAGATTATATCTGCGAGAATTATTGGCGAGACTCGTTCTCGAAACGAAGTATGGAATAATTGAGGTGTGGAGAAGTGGAATAGGAACACCTCTAGCAGGTGAGGTATCGAGGTATCCGGGTGTATCCAATGTGGACAGGCAAAAGCGAGGAGGCATACTTATCGATGGCACTGTTCGATTGGTTGAAAGTTGTTTATACGGTATATTCCACGGTGTTCTCTTGATCATTCGTTAG
331	ADOR3B80972	NA	NA	NA	NA	NA	NA	NA	NA	NA	NA	NA	NA	NA	NA	NA	NA	NA	NA	NA	NA	NA	NA	NA	NA	NA	NA	NA	NA	NA	NA	NA	NA	NA	NA	NA	NA	NA	NA	NA	2	NA	NA	NA	NA	NA	NA	ATGGATCCCTGTTGCCAACGGCCCGCCCTTTGTTTGTTCCAAGGGGCAGGTGAACGAGGAATTCCTCCTCGAGGAAATAGAAATGCAATTGGAACGCATCCTTTCGAAAAATTAAATGATCGTCGTGCGACGACAATCAGTTCATCCTTGAAAGGTTGTAAAAAAGTAGCCGTGGATGTAACAGGATGCGGTAATCGATCCAAGCCAGCGGCGGACAATCGAAAACGCAGAATCGGGCTGCTAGGAAATTACGGGATCCCCGGCGGCTACCTCGAGTGTCAGGCTACCGCCGGCTTACGCAAACATGACATCGACGCGTTTCCCGATCTCACGTATCTAATGTCGGAGGGAGAGGAGGAGGTGGAACCCTCCTTCCTCCCTGTGAACGAAACGCAGAAC…
332	ADOR3B80974	NA	NA	NA	NA	NA	NA	NA	NA	NA	NA	NA	NA	NA	NA	NA	NA	NA	NA	NA	NA	NA	NA	NA	NA	NA	NA	NA	NA	NA	NA	NA	NA	NA	NA	NA	NA	NA	NA	NA	2	NA	NA	NA	NA	NA	NA	ATGGAAAGGGAGGATTTTGCCCTGCAGGCAGAAATGGCCCTTCCTTCTCCCCCTCGATCTCAAGATGGACATTTCCTGCGGTCACAGTCCACGGTTATTGATCGGAATCGGATAGCGGAGACGTCTAAATCGGCACGCGGAAGAGACCAACGACCGGACCGCTCTTCAGAAGAAGAAGAAGAAGAAGAAGAAGAAGAAGGAGAAGAAGAAGAAGAAGAAGCGAGGAGGGATGCGGAGGAGAAGGAAAAAAAGGAGGGAAAAAGGGGGGAAAAATAA
333	ADOR3B80978	NA	NA	NA	NA	NA	NA	NA	NA	NA	NA	NA	NA	NA	NA	NA	NA	NA	NA	NA	NA	NA	NA	NA	NA	NA	NA	NA	NA	NA	NA	NA	NA	NA	NA	NA	NA	NA	NA	NA	2	NA	NA	NA	NA	NA	NA	ATGGAGAGCCATTCGAGAAGCTTAATAAGCCCGAGGAATAAGACGAGCGGACGAAAAAACAGAGACGAGCGACGAGGTAGTGGTGCTGATGGTGGTGGTGGTGGTGATAGTGGTGGTGGATATAGTGGACGAGGATATAGTCTGGCCGTGGAGAGAAGAAGGGAAGAAGAAAGGCGAGGCGGCGGTGGGGCATCGCTAGGCGAAAAAACGACCCCGACCGCTCGGGCCCGTTTGCCTTACAATTAG
334	ADOR3B80980	NA	NA	NA	NA	NA	NA	NA	NA	NA	NA	NA	NA	NA	NA	NA	NA	NA	NA	NA	NA	NA	NA	NA	NA	NA	NA	NA	NA	NA	NA	NA	NA	NA	NA	NA	NA	NA	NA	NA	1	NA	NA	NA	NA	NA	NA	CCGCGCGTACCTTGCCCCTAAAGCCCCTAAAAGTCTTGCCTAACGTCGCCAGCCAGATGTTCGTGAACGTCATCATCTCCGTTCGAAATTCCTTTTCGATTATTCGTGCAATTTTCCTGTGCCAGTTCTCGTGGAATTATTTCTTTATTTTAGCCAGGGGATTAAAATTATCTCCAAGTGTATGTAACGAATTTTGGATAAATTCGCTAG
335	ADOR3B80981	NA	NA	NA	NA	NA	NA	NA	NA	NA	NA	NA	NA	NA	NA	NA	NA	NA	NA	NA	NA	NA	NA	NA	NA	NA	NA	NA	NA	NA	NA	NA	NA	NA	NA	NA	NA	NA	NA	NA	1	NA	NA	NA	NA	NA	NA	ATGGGAATCACGGATACGGGTAAAAGGAATGGAGAATCGATTCCACCAAGACTCGGTAGATTTGGAATAAGGATATGGGCAAAGGAGACGGATATTCGAATGATGTACAGTTCAATAATTATCAGAGCAAAGGGTATACGAATACGACGAACTCAGTCGCTTGTCGAGCAGTCGAAGGAGTCGAACTTTTCTGAACTGTGTCCATGGGCTTAG
336	ADOR3B80985	NA	NA	NA	NA	NA	NA	NA	NA	NA	NA	NA	NA	NA	NA	NA	NA	NA	NA	NA	NA	NA	NA	NA	NA	NA	NA	NA	NA	NA	NA	NA	NA	NA	NA	NA	NA	NA	NA	NA	1	NA	NA	NA	NA	NA	NA	CTTAAGCAACTTCTAAGCGGCACAATGACCGTCGTCGTGAAGGGAAGTTCCTCGCGTATTTCCCTCACGTACCTTCCCCCTCCCCCTTCCTCTCGAGCTACTCTGAAAGCGGATGTTACTACTACTACGGAGGAATCTTGCAAGGGGGAGAGGGGGAAGCGTAAAATCGAGAACCCCCCTGTTTTGAGGGATGATGGAAACGTCGAAGGATTATTCTTTATCCTTTTCTCTTGTTCGATATTTCTCGAGGAAGGGAATATTTGTATTCGTGATTGTAATAAGAAGAAGAACGTATCGAGTGTAACAATGAATTCTATGCAACAATTTCAATTTCTCTCAAGATATATTTCTGCGAACAAAATCTTTT
337	ADOR3B80987	NA	NA	NA	NA	NA	NA	NA	NA	NA	NA	NA	NA	NA	NA	NA	NA	NA	NA	NA	NA	NA	NA	NA	NA	NA	NA	NA	NA	NA	NA	NA	NA	NA	NA	NA	NA	NA	NA	NA	3	NA	NA	NA	NA	NA	NA	ATGACACGGTGCCGATTCGATGACGATGCGGAATGCAGCGTACAACTCGTGTCACCGTTGGGGGTCCGAGAGTTGCGGCGCTCGTCGCCCGGGGGCCTATCGTCTCCTACGGCCCGTATTCCTTTCAACTGTCCGACGCGAATCCGAATCCGGGACCCCCCCTCGGCAATCGGCTCGACAGAAAGACGGAGACTGTCAACCGATCATTTTCCCGTGCAACGACGAAAAGCGAAACGAGTTTCAAACTCGCTCCTCGATTTATGTCCTCTCCGCGTGCATTCTCCGTGTTCGACCATTTCTTCGCCCCCTCCTCCTCCTCCTCCTCCTCCCTCTACCCTCCCTCGATCACCCTTCTTTCTTCTTTCTTCCCCCGATGTAGCTGGCAAGAACGTAAAGTCA…
338	ADOR3B80992	NA	NA	NA	NA	NA	NA	NA	NA	NA	NA	NA	NA	NA	NA	NA	NA	NA	NA	NA	NA	NA	NA	NA	NA	NA	NA	NA	NA	NA	NA	NA	NA	NA	NA	NA	NA	NA	NA	NA	1	NA	NA	NA	NA	NA	NA	ATGCCCCCTGCCGTAGACCACGACGAGGACAACGACGACGACGACGACGACGACGAGGACGACGAGCGGAGAGAAAGGCGAGTGGCTCGTCGTCGTGACAAAAACCTTCGCCGTATTCCCGATCCGATCTCACCCCAATTAACGATCCTCTTCCTCCCGCTCCTCTCCAACAGAGAATCTCGTCGAGGATCTTCGAAATCTTCGCCGCGTCCAGATTTTCCAAAAAAATTCGCGAAAAATCTCTCCGACTGTTCGAAATTTATGCACCCGTCCGAATATGGTTTCGCCAACTACGAGATATATGGTATAATAATTCTCGATATCAGGTGCCTTTAA
339	ADOR3B81009	NA	NA	NA	NA	NA	NA	NA	NA	NA	NA	NA	NA	NA	NA	NA	NA	NA	NA	NA	NA	NA	NA	NA	NA	NA	NA	NA	NA	NA	NA	NA	NA	NA	NA	NA	NA	NA	NA	NA	1	NA	NA	NA	NA	NA	NA	ATGGAAGATCGAGGAACGAAAGGGGGCATCGGCGAGCAAGAGAAGAAGAAGAAGACGAGGAAGAAGAAGAAGAAGAGGAAGAATAAGAGGAGCGTCGTCGTCGTCTTCGTCGTCTTCGTCGTCGTCGTTGCCGTCGTCGTCGTCGTCGTCGAGAAGGAAAGGGGGGATGCGCGCACGGGAATGTCCACGAGAGAAGGAACGATGTAA
340	ADOR3B81010	NA	NA	NA	NA	NA	NA	NA	NA	NA	NA	NA	NA	NA	NA	NA	NA	NA	NA	NA	NA	NA	NA	NA	NA	NA	NA	NA	NA	NA	NA	NA	NA	NA	NA	NA	NA	NA	NA	NA	1	NA	NA	NA	NA	NA	NA	ATGGTCTCGGCTCGAACCGTCCTGGACCTACGGACTCTGCTACGGTCTCTCGAGGTCAACCCGCTTTGGGGCATCGTGCTAACCGCACCGGTGGATCCTTCTACCCGGAAACGGGTTTCTATCGGTCTCTCGCGAGAGCTCCACAGATCCAAGCCGCTCCTTTGGTCGTTCCTTCGCTTTTCCTTCGAGTTACGAATCACTCATAAGACGGGTTTTACGCTCTCGTTCCTCTCGACCCGGAATGCTTTTCTAAATTCTAATGCTTTCGACGAGGACGAAGGTAGAATCGCGTTCAGAAAGGGGGCGAAGGAATATCGAATTTCGGGGGATATCGTTTCTCGTTATACCGTGGCCCCTATCCGTGCAAAGGTAGAAGGGGGAAAGATTTCAAAAGGAGGA…
341	ADOR3B81012	NA	NA	NA	NA	NA	NA	NA	NA	NA	NA	NA	NA	NA	NA	NA	NA	NA	NA	NA	NA	NA	NA	NA	NA	NA	NA	NA	NA	NA	NA	NA	NA	NA	NA	NA	NA	NA	NA	NA	2	NA	NA	NA	NA	NA	NA	ATGGAGATGCGAATTCCTGATGTCGTTGAGAAACAAGAATCCGCGGGCAAAGATGGGGTCGGTTACATGGGAAATGGTGGAGGCGATGGAAACTCGTGGAGGCAACGTATGGCTACGTCTTACTCCGTGGATACACACCGCGAATGCGAATAA
342	ADOR3B81017	NA	NA	NA	NA	NA	NA	NA	NA	NA	NA	NA	NA	NA	NA	NA	NA	NA	NA	NA	NA	NA	NA	NA	NA	NA	NA	NA	NA	NA	NA	NA	NA	NA	NA	NA	NA	NA	NA	NA	1	NA	NA	NA	NA	NA	NA	ATCCGCAAATGCTTTATGAAAGAAATTGTAATAAAAATATGAAATACGGATATGGAATATTAAGCGAGACCTTAGAGAATAGTTGGGCGAAAGAATTGGTCGTATCGTTCAATTCGCGGGAAAAACCAGAAAGGGTTAATAGCGAATTCACTGGATTAAAAAGCAAG
343	ADOR3B81044	NA	NA	NA	NA	NA	NA	NA	NA	NA	NA	NA	NA	NA	NA	NA	NA	NA	NA	NA	NA	NA	NA	NA	NA	NA	NA	NA	NA	NA	NA	NA	NA	NA	NA	NA	NA	NA	NA	NA	1	NA	NA	NA	NA	NA	NA	ATGATGATTTTAGGAAATGAAGAGTTGGAGTATTTGGGATATTTATTTGCATCTATGGAGAATTGTAAAGGATTCTTGGGATGGTTTTTTTGTGAAAATTTTTGTCGAGGAAAAATTTTGAATCTGAAATTGATGATTTTGGGAATTGAAGAGTATGCTTGA
344	ADOR3B81055	NA	NA	NA	NA	NA	NA	NA	NA	NA	NA	NA	NA	NA	NA	NA	NA	NA	NA	NA	NA	NA	NA	NA	NA	NA	NA	NA	NA	NA	NA	NA	NA	NA	NA	NA	NA	NA	NA	NA	1	NA	NA	NA	NA	NA	NA	ATGGGATTAAAGGGATTAATTAAAAAGAGATTAGAGAGACCAATAGTCTCGTTGGAGAAAAGTTTCGAAGGATGGGTTCTCACGAGGTCACATCTCAATCCTGGGGATCAGGATCTTTTCACTTTCATAATGATCCATCGCACACCACTAGCAAACATGACTTGTGAAGTGGCTATTACAGTTATATCTATTTAA
345	ADOR3B81073	NA	NA	NA	NA	NA	NA	NA	NA	NA	NA	NA	NA	NA	NA	NA	NA	NA	NA	NA	NA	NA	NA	NA	NA	NA	NA	NA	NA	NA	NA	NA	NA	NA	NA	NA	NA	NA	NA	NA	1	NA	NA	NA	NA	NA	NA	ATGGCGGGAATTCCTACTGACGCTCCCGCCAGTATGGATGTAACTACAGCTAATAGGGAGAGATCCGTTCTTATTTGTCTCATCAGAACACAGCACTCCTCTACAAATGTTTCATATTCCTCCAAAATGTATTACGCCATATCATGGAAGGCTGCGCAGTGA
346	ADOR3B81074	NA	NA	NA	NA	NA	NA	NA	NA	NA	NA	NA	NA	NA	NA	NA	NA	NA	NA	NA	NA	NA	NA	NA	NA	NA	NA	NA	NA	NA	NA	NA	NA	NA	NA	NA	NA	NA	NA	NA	1	NA	NA	NA	NA	NA	NA	ATGGCTTTATCTGAATGGACATATTTTCTGACTATTTTCGTGGCACCCATTATGCAAAGTCCAATTTCAATTAATCCAATTTTAATAAAAAAGAGGAAGGAAACATTAGAGAAGTGGAGAAGAGCAAGGACTTGGTCTCATGCAACGAAGACAAATTGA
347	ADOR3B81075	NA	NA	NA	NA	NA	NA	NA	NA	NA	NA	NA	NA	NA	NA	NA	NA	NA	NA	NA	NA	NA	NA	NA	NA	NA	NA	NA	NA	NA	NA	NA	NA	NA	NA	NA	NA	NA	NA	NA	4	NA	NA	NA	NA	NA	NA	ATGGGGGAAATACGCACGCTGAACGTTGAAAAGACGTTGGATCGTTTGCTGTTAAATTTTTCGGTTAAAGAGAATTGGAGAAAACGGGAGAAGAGGAGAGAAAAAGCGAGGGAAGGAAGAAAGGAAGAGAGAAGGAGAGAAAGAAAGAAAAAAAAAAAAAAACTGCTTATTAAAGTGAATGACGTGAGAAGGAGGAAGGAAAAGGGAAAGGGAAAGGGAAAGGGAAAGGGGAAAGAGAAGGAAAGCGAGGGGGATGGCGAAGGATATGGAAGCGTGCACTGTTGGAACCGCAAGATCCAGGATCCGATATACCCGGCCGAGGTGAGGTACGAAGCAATAACTGGTCATGTCGCCCAGACGAGATCGAGAGTTGGAAGTTTTCGATCGCGGATGGAAATT…
348	ADOR3B81076	NA	NA	NA	NA	NA	NA	NA	NA	NA	NA	NA	NA	NA	NA	NA	NA	NA	NA	NA	NA	NA	NA	NA	NA	NA	NA	NA	NA	NA	NA	NA	NA	NA	NA	NA	NA	NA	NA	NA	1	NA	NA	NA	NA	NA	NA	ATGGAAACGGTGGTTGGAAACTCGGCGTTTGTTGGCGTACGTAACATCTCTGGTCGCGTCGTAGCGCCTCGGTTGAAACCTCGTAAACCCGGCAACGACCAATTAAACGAAACGAGCAGCGCGCTGATGCACTCTCTGCCTGCCTGCCGGCATTACCTACAGGTTATACGACTCGCGGAATTACCCTCAAATTACACACTTGGTACCGATGTGTGCACTCCCCCCCTCGCGCCGCTCTCCATACTTACCGGGCGGATAACAACCGGTCGGCCGGCAACGCCGCGGAAACCCTCCTCCTCCTCCTCCTCCCTATCCTCCCAACTGCCCAACTCGGGGATCATCTTTTCCTCCGTCGGTATTCGCGCGCCTTCGTATCCCGCTTTAACCCTTCGCCGAGGA…
349	ADOR3B81097	NA	NA	NA	NA	NA	NA	NA	NA	NA	NA	NA	NA	NA	NA	NA	NA	NA	NA	NA	NA	NA	NA	NA	NA	NA	NA	NA	NA	NA	NA	NA	NA	NA	NA	NA	NA	NA	NA	NA	1	NA	NA	NA	NA	NA	NA	ATGGAGGATACGCTCTGGCGGAGGAGGACCAAGCGACTCCGGTTGAAAGAGGAGCGCGAGAATCGGCGGGGGCCGGTCGGCGGAAGAGAAGAGGACGAAGGAGAGGAAGAAGAAGAAGAAGAAGAAGAAGAAGAAGAAGAAGAAGAAGAAGAAGAAGGGGGCTGA
350	ADOR3B81100	NA	NA	NA	NA	NA	NA	NA	NA	NA	NA	NA	NA	NA	NA	NA	NA	NA	NA	NA	NA	NA	NA	NA	NA	NA	NA	NA	NA	NA	NA	NA	NA	NA	NA	NA	NA	NA	NA	NA	1	NA	NA	NA	NA	NA	NA	GAAGAAACATGGGGGCCAAAATTGTTTTCAATTTATCATAATCGTAAATCCATCGAGGCCGAGGAAGAAGAAGAAGAAGAAGAAGAAGAAGAAGAAGAAGAAGAAGAAGAAGAAGAAGAAGAAGAAGAGAGACTTGAAGAAGAAGAAGAAGAAGAAGAAGAAGAAGAAGAAGAGAGACTTGCAGGGTTGTAA
351	ADOR3B81115	NA	NA	NA	NA	NA	NA	NA	NA	NA	NA	NA	NA	NA	NA	NA	NA	NA	NA	NA	NA	NA	NA	NA	NA	NA	NA	NA	NA	NA	NA	NA	NA	NA	NA	NA	NA	NA	NA	NA	1	NA	NA	NA	NA	NA	NA	ATGCACGTCGAACCATCGATTTCCGCGTGTGCTGCCCACGTGATCGAGCTCCATCTCGCAACACGACACCTCTCCCCGACTCGGCCGTGCCTCGGCCGTTGCTGGTGTGCTGGTGCCCGGGTGGTGGTGCTGGGTCTCGGTCCCGCTCGTTCACGGATTCGAGCCGTGCCATCCATCCACGACCAACGAGTTTCGTCTTCCCGCTCGAGCAGGGAACCACCGATCCACGCCGAATTATTGATCCCTGGATCTCGTTTAATCTATCGCGATATTGGATTTTCAAGAAATTCGGTGAGAAAGAAGGCGGATTGGACGTTAGCCTGGCAACTAGAGAAAGAGAGAGAGAGAGAGAAAGAGAGAGAGGAAGAAGGTTGGAGGATCACGTGGTCGGGGAATAGT…
352	ADOR3B81119	NA	NA	NA	NA	NA	NA	NA	NA	NA	NA	NA	NA	NA	NA	NA	NA	NA	NA	NA	NA	NA	NA	NA	NA	NA	NA	NA	NA	NA	NA	NA	NA	NA	NA	NA	NA	NA	NA	NA	1	NA	NA	NA	NA	NA	NA	ATGGGGGGAGGATGCATCGTCGCATCGTTTACTCGTTTTACGCGGCTTGAACCGATCGCCGGAACATTTCCGCGAGGGAGAGAAGGAGAGAAGGAGAAGAAGAAGAAGAAGAGGGAGAGACAGAGGAGCGGAAACGAGGAGGGTAGGGGAGCGGTTGGCGTGATCCAAGGTCACGGCGACGACGACGACGACGACGACGATGACGATACGGGATCGCGTGTCCGCTCGAGAAAGAAACGGGAGCCGACAGTGGCTCTTTTGGCTCCTTGA
353	ADOR3B81120	NA	NA	NA	NA	NA	NA	NA	NA	NA	NA	NA	NA	NA	NA	NA	NA	NA	NA	NA	NA	NA	NA	NA	NA	NA	NA	NA	NA	NA	NA	NA	NA	NA	NA	NA	NA	NA	NA	NA	1	NA	NA	NA	NA	NA	NA	CGCGAGAACGAAGAAGAAGAAGAAGAAGAAGAAGAGGAGGAGGAGGAGGAACGCGTCTCGTTCGACGACCCCCTGATCGATCAATCTGCTTCTTTCGCCACCTCCGAGAAAAGAAGAAAAGAGAAAAAAGGGGAAGAAAAGAAGAGAGAAGGGGGGGAAGAAGAGGGAGAAAATAAGAGGAGAATAAAAAGACGAAAGTTCGCCGAGTCGTCCGCTATTCGTCAAAGCGCAGTTCGCCGGAAGCCGGGGAT
354	ADOR3B81135	NA	NA	NA	NA	NA	NA	NA	NA	NA	NA	NA	NA	NA	NA	NA	NA	NA	NA	NA	NA	NA	NA	NA	NA	NA	NA	NA	NA	NA	NA	NA	NA	NA	NA	NA	NA	NA	NA	NA	1	NA	NA	NA	NA	NA	NA	ATGGAACTAGCCTCCGTCATCCGTCGATTGGAGCTTGCAGCGCTTCAGAAGATCCATAAGAAACCATATGATTTTTTCCGAGAAGATTTCGAGCTGCCTATTCGTTTTAGTCATGGTTACAGATTGGCGAAAAATATGTCCAAGTGGATAAGAGCATGA
355	ADOR3B81151	NA	NA	NA	NA	NA	NA	NA	NA	NA	NA	NA	NA	NA	NA	NA	NA	NA	NA	NA	NA	NA	NA	NA	NA	NA	NA	NA	NA	NA	NA	NA	NA	NA	NA	NA	NA	NA	NA	NA	1	NA	NA	NA	NA	NA	NA	ATGATAGAACACGTCAGAGATGCGGCTATCTATCTTAGAGCTGCAATGATTGAGATTGTCAAGAAGACTTCCAGCATGGGATCTGTGTCGGAGCTAGAAAACACAAATGCTGAGCTGAGATTCCAAATTGGGAATCTCAAAAACAAACTTGAGTCCCTAAAGTTATAG
356	ADOR3B81171	NA	NA	NA	NA	NA	NA	NA	NA	NA	NA	NA	NA	NA	NA	NA	NA	NA	NA	NA	NA	NA	NA	NA	NA	NA	NA	NA	NA	NA	NA	NA	NA	NA	NA	NA	NA	NA	NA	NA	1	NA	NA	NA	NA	NA	NA	ATGAGAATAAAAGTGAGAATAAGAGTGACAGTAAGAATGATAGTGAGAGTAAAAGTGAAAGTGAGAATAAAAATAAAAGTAAGAATAGGAGTAGGAATAGGAGTAGGAATAGGAGTAGAAGTAGGAGTAAGAGTAGGAGTAGGAGTAGAAGTAAAAGGAATATAA
357	ADOR3B81178	NA	NA	NA	NA	NA	NA	NA	NA	NA	NA	NA	NA	NA	NA	NA	NA	NA	NA	NA	NA	NA	NA	NA	NA	NA	NA	NA	NA	NA	NA	NA	NA	NA	NA	NA	NA	NA	NA	NA	2	NA	NA	NA	NA	NA	NA	ATGCATGAAAAAGAAGAAGAAGAAGAAGAAGAGGAAGAAGAAGAAGAGGAAGAAGAAGAAGAGGAAGAAGAAGAAGAGGAAGAAAAAGAAGAAGAAGAGCAAGAAGAAGAAGAAAAAGAAGAAAAGGAAGAAGAAGGAGAAGAAAAAGAGGAAGAAGAAGAAGAAAAAGAAGAAGAAGAAGAGGAAGAAGAAGAAGAAGAAGAAGGAGGAGAAGAAGAAGAGAAAGAAGAAGAACAAGAACAAGAGGAAGAAGAAGAAGAAGAAGAAAAAGAAGAAGAAGAAGAAGAAAAAGAAAAAGAAGAAGAAGAAAAAGAAGAAGAAGAAGGAGAAGAAGAAGAGGAAGAAGAAGAACAAGAACAAGAGGAAGAAGAAAAAGAAGAAGAAGAAGAAGAACAACAA…
358	ADOR3B81182	NA	NA	NA	NA	NA	NA	NA	NA	NA	NA	NA	NA	NA	NA	NA	NA	NA	NA	NA	NA	NA	NA	NA	NA	NA	NA	NA	NA	NA	NA	NA	NA	NA	NA	NA	NA	NA	NA	NA	1	NA	NA	NA	NA	NA	NA	ATGCTGTTCCACAATCGTATTCTTTTCGTCCGCTCGCGTGTGGATGGGAAGAAAAGAGCAGAGGAAGAGGAGGAGGAAGAAGCAGAAGAGAAAAAGAAAAGAGAAAAGAGGGGAGAGAAAGAAGGAAAGAGACGAGGTATCGTCCAATTAGCAGCGGCAAACGTTGGTAGAAAGAGGCCCGAGGCAAGGAGCGATAGGAAGGAAACGGCCGAAACGATTTTTCGATTCTTTTCCAGAATCGTATGCTTTTCGTCCGATCGTAATCGCGTGGGGATGGGAAGGAAAGCGAAGAGGAAGAGGCGGAGGAAGAAGAAGAAGAGAAAAAGACAAGAGGAAAAAGGGGAGAGAAAGAAAGAAAGAGACGTGGTATCGTCCAATTAG
359	ADOR3B81183	NA	NA	NA	NA	NA	NA	NA	NA	NA	NA	NA	NA	NA	NA	NA	NA	NA	NA	NA	NA	NA	NA	NA	NA	NA	NA	NA	NA	NA	NA	NA	NA	NA	NA	NA	NA	NA	NA	NA	1	NA	NA	NA	NA	NA	NA	ATGATAATTACGAGGCGAACAGTGGAAAGAGCGTTCGAAAGGAAAGAAGAAGAAGAAGAAAAAGGGACGTCGATAATCGATTTTCGAGCAACGGAAAGAATACTCGAAAGAAAAGAAGAAGAAGGAGAAGAAGAAGGGACGTCGATGATCGATCTTCCAGCGACGAAAAAAAGAACAAGGAGAAGGAAAAGGAGAAGAAGAAAAAGAATAAGAAGAGACGTCGATGATCGATCTTCGTCCATCGCATTCGTCGACGAAACACCGATAATAATTGCGAAGCGAACGACGGAAAGAACGTTCGAAAGGAAAGGAAAAGAAGAAGAAGAAGAAGGAATCGATCTTCGTCCATCTCATTCGTCGATGATAATTGCGAGGCGAGCGGTGGAAAGAGCGTTCAAA…
360	ADOR3B81184	NA	NA	NA	NA	NA	NA	NA	NA	NA	NA	NA	NA	NA	NA	NA	NA	NA	NA	NA	NA	NA	NA	NA	NA	NA	NA	NA	NA	NA	NA	NA	NA	NA	NA	NA	NA	NA	NA	NA	1	NA	NA	NA	NA	NA	NA	ATGGAAAGAACGTTCGAAAGGAAAGGAGAAGAAGGAGAAGAAGGGATGTTGATGGTCGATCTTCCAGCGACGGAAAGAAGAAGAAGGAAAAGGAGAAGGAGAAGGAGAAGGACAAGAAGAAAAATAATAAGAAAAGACGTCGATGATCGATCTTCATCTATCGCGTTCGTCGACGAAACACCGATGATAGTTGCGAGGCGAACGATGAAAAGAACGTTCGAAAGGAAAGAAGAAGAAGAAGAAGGAGAAGGAGAAGGAGAAGGACAAGACGAAAAATAA
361	ADOR3B81185	NA	NA	NA	NA	NA	NA	NA	NA	NA	NA	NA	NA	NA	NA	NA	NA	NA	NA	NA	NA	NA	NA	NA	NA	NA	NA	NA	NA	NA	NA	NA	NA	NA	NA	NA	NA	NA	NA	NA	1	NA	NA	NA	NA	NA	NA	ATGATAGTTGCGAGGCGAACGACGAAAAGAGCGTTCGAAAGGAAAGAAGAAGAAAAAGAAGGGACGTCGATGATCGATTTTCGAGCGGCGGAAAGAACGTTCGAAAGGAAAGAAGAAGAAGAAGAAGGAGAAGGAGAAGGAGAAGAAGGAGAAGAAGAACGGATGTCGATGATCAACGAAAAGAGCGACGGAAAGAATGTTCGAAAGGAAAGGAAAGAAGAAGAAGAAGAAGAAGGAAAACGAAAAGAAGAAGAAGAAGAAGAAGAAAAAGAAGAAGGGACGTTGATGATCGATCTTCCAGAAACGGAAAGAAGAAGAAAGAGAAGAAGAAGGAGAAAGAGAAGAAGAAAAAAAGAATAA
362	ADOR3B81190	NA	NA	NA	NA	NA	NA	NA	NA	NA	NA	NA	NA	NA	NA	NA	NA	NA	NA	NA	NA	NA	NA	NA	NA	NA	NA	NA	NA	NA	NA	NA	NA	NA	NA	NA	NA	NA	NA	NA	1	NA	NA	NA	NA	NA	NA	ATGGAGATTGGGCGGCTGTCGGAGGAGGAACCGAATCGCGTGGATCGAAGACGAAAAGGCAGCTGCGGAAACGGAAACGGAGAAGAAGAGGAGGAGGAGAAGAAGAAGAAGAAGGAGAAGGAGATGTGGAAGAAACGAGACGGAATAAGAGGGGAAAATAA
363	ADOR3B81191	NA	NA	NA	NA	NA	NA	NA	NA	NA	NA	NA	NA	NA	NA	NA	NA	NA	NA	NA	NA	NA	NA	NA	NA	NA	NA	NA	NA	NA	NA	NA	NA	NA	NA	NA	NA	NA	NA	NA	3	NA	NA	NA	NA	NA	NA	ATGATTGTATATCTAGAAAACCCCATTGTCTCAGCCCAAAATCTCCTTAAGCTGATAAGCAACTTCAGCAAAGTCTCAGGATACAAAATCAATCTGAAACTGGATCCCTTCCTTACACCTTATACAAAAATTAATTCAAGATGGATTAAAGACTTAAATGTTAGACCTAAAACCATAAAAACCCTAGAAGAAAACCTAGGCAATACCATTCAGGACATAGGCATGGGCAAGGACTTCATGTCTAAAACACCAAAAGCAATGGCAACAAAAGCCAAAATTGACAAATGGGATCTAATTAAACTAAAGAGCTTCTGCACAGCAAAAGAAACTACCATCAGAACTGGATTAAGAAAATGTGGCACATATACACCATGGAATACTATGCAGCCATAA
364	ADOR3B81197	NA	NA	NA	NA	NA	NA	NA	NA	NA	NA	NA	NA	NA	NA	NA	NA	NA	NA	NA	NA	NA	NA	NA	NA	NA	NA	NA	NA	NA	NA	NA	NA	NA	NA	NA	NA	NA	NA	NA	1	NA	NA	NA	NA	NA	NA	TCGTTAGAGGTGCTACAGGTGTATGTTTTTCGTCGATGTCTCTTGCAAAGCTTCTTGTCTTTTCATCTACTTCATCTGTTTTTGTCCCTCCTACTTTGTATCAATGTATTTCTGACTATGGCTACAAAGAGGCCATAGTCAGAAATACGTTG
365	ADOR3B81199	NA	NA	NA	NA	NA	NA	NA	NA	NA	NA	NA	NA	NA	NA	NA	NA	NA	NA	NA	NA	NA	NA	NA	NA	NA	NA	NA	NA	NA	NA	NA	NA	NA	NA	NA	NA	NA	NA	NA	2	NA	NA	NA	NA	NA	NA	ATGGTGGGCGGCACCAAAAATTGGCCAATGAAAAAACATAATACTATTACTACTACTACTACTACTACTACTACTACTACTACTAATAATAATAATAATAATAATAATAACGATGATGATGATGATGATGATGGTGACGATGATGATAATGATAATAATGATAATAATGATAATAATGATGATGATAATGATGATGATGATGATGACAATGATGATGATGATAATGATGATGATGATAATAATGATAATAATAATAATAATAATAATAATTGTAATGATATATATATATAG
366	ADOR3B81219	NA	NA	NA	NA	NA	NA	NA	NA	NA	NA	NA	NA	NA	NA	NA	NA	NA	NA	NA	NA	NA	NA	NA	NA	NA	NA	NA	NA	NA	NA	NA	NA	NA	NA	NA	NA	NA	NA	NA	2	NA	NA	NA	NA	NA	NA	ATGTCGAGCGGATCTTTGGATCACGGCACGCGTGATCGAAAATTCGGCGACTTGGAAGGTACTCGAAGCAATTATCCTCGTACGTTAAGAGCGAAAAATAAAAAACCAGAATCCATTCAAACTGTTCCAAACATTCCAGTTTCACCGGTTAATTCTGAATCACCATCTCCAAAAATCACTAAATCAACTGCTCGTCAAGCTTGA
367	ADOR3B81220	NA	NA	NA	NA	NA	NA	NA	NA	NA	NA	NA	NA	NA	NA	NA	NA	NA	NA	NA	NA	NA	NA	NA	NA	NA	NA	NA	NA	NA	NA	NA	NA	NA	NA	NA	NA	NA	NA	NA	1	NA	NA	NA	NA	NA	NA	ATGTCGATGATGGTTTTCAAGAAGTTAGGACAAAAGTTTGTGGATGAATCGAACAATGTAGTATCAAGTAAGAACATGTATGATATGGCAAATACTTGCCAAGATAGTGATCATTACGGGTTTGCTCAAAAAGGATCTGGATACCGACGAGTCACATCCGTAACATTCGGAACAGAAGATAAACCGAAGCACGTATAA
368	ADOR3B81229	NA	NA	NA	NA	NA	NA	NA	NA	NA	NA	NA	NA	NA	NA	NA	NA	NA	NA	NA	NA	NA	NA	NA	NA	NA	NA	NA	NA	NA	NA	NA	NA	NA	NA	NA	NA	NA	NA	NA	1	NA	NA	NA	NA	NA	NA	ATGGATGGAAGAGGATCAGGACGCTTAGACGAGGATACTGGCTCTGAAGATGAATTCGTGGAAATGGATCTTTGCGATTTCTTTATTGTTGTATTTATTTTTGATGCTGGTAATTGTACTTGTTATTTTGTCATTTTTGAAGAATGTGAAAACGTATAA
369	ADOR3B81253	NA	NA	NA	NA	NA	NA	NA	NA	NA	NA	NA	NA	NA	NA	NA	NA	NA	NA	NA	NA	NA	NA	NA	NA	NA	NA	NA	NA	NA	NA	NA	NA	NA	NA	NA	NA	NA	NA	NA	1	NA	NA	NA	NA	NA	NA	ATGGTGAATAGGCGAAAGAGGCGAAGACAAGGCAAGCTAATCTACAGGGAGCGATCTTCTACTTTCGAAGGAATACAGAGGTCCGCTGCAAGCCTTTGTGAAGCGGGAAGTGGGGAGCAGAGGTGGAAATCCCTGGAACTTTCCCTTGGCGAGAGGTTCCGGCAAAAAAATCCTCGCCCTCGATCACTGGACGCGTCAGGAACGAACTTTTCTCTCGAAAGAGCAACAGCCTCGACGGAGAGTATTCCAAGTTCAGGAGCACTGACCACTTTGGCCAACGTGGGAGAAGGGGGATGA
370	ADOR3B81258	NA	NA	NA	NA	NA	NA	NA	NA	NA	NA	NA	NA	NA	NA	NA	NA	NA	NA	NA	NA	NA	NA	NA	NA	NA	NA	NA	NA	NA	NA	NA	NA	NA	NA	NA	NA	NA	NA	NA	1	NA	NA	NA	NA	NA	NA	AGCGCTTGCATCAAGTCGTATATTTTTGCATAACTCTTCGCCAAGAAATAAAAAGACAACCTGGCCAATATTATTGCTGCCGCAATTAGGAGATTATACAGTACCTCCTCGTGATTCTGATGGCGAGCTGGCACTGAATTTGTCACAGTTTGTCGATTCTTCGGCAGCTTACCAAGTCGGCCGATATGGAAGCACCGTATTACATCATGCTTCACACAACTCTTATATAGAGGCAATGAACATTTTTCTCTGA
371	ADOR3B81273	NA	NA	NA	NA	NA	NA	NA	NA	NA	NA	NA	NA	NA	NA	NA	NA	NA	NA	NA	NA	NA	NA	NA	NA	NA	NA	NA	NA	NA	NA	NA	NA	NA	NA	NA	NA	NA	NA	NA	1	NA	NA	NA	NA	NA	NA	ATGGATGGAACACGTTACACTGGTCCAACAACAATTCACAAATTAATTTCACCGTCGTTGCGTGGACGAAGAAAGAAACGTGGACACAATTTGAAATCCTCGTTGGCGAAAATGGTCGCGATGCAGGATTATTTAGTTGGATGGAACGTACCTCTTCCTGATGCCTGGAAGCGGGGTACTAATCGTTGGGTGAGAGCCGAGTCCGTTGACAGGGGTTGA
372	ADOR3B81281	NA	NA	NA	NA	NA	NA	NA	NA	NA	NA	NA	NA	NA	NA	NA	NA	NA	NA	NA	NA	NA	NA	NA	NA	NA	NA	NA	NA	NA	NA	NA	NA	NA	NA	NA	NA	NA	NA	NA	2	NA	NA	NA	NA	NA	NA	AAGTTTGATATTAATGCTAGCATTTTGTGCTTGATTCCGCCACATTCAGATTCTGTTTGTAAGGGTTTTGTCGGTAAAGGTTTTGTTGGTAATGGTTTTGTTGGTAATGGTTTTGTTGGTAAGGGTTTTGTTGGTAAGGGTTTTGTTGGTAAGGGTTTTTGTTGGATTAGGAAAAACATAAAAAAAAAATTTACCATGATGATGTTCATACAAATTGTTTGGGCAAATTTATGGATTTCTTTACCCATGGAACCATATTCAGTAGATGTAGGCAATGTTCGTCAGATGTCACAATGA
373	ADOR3B81283	NA	NA	NA	NA	NA	NA	NA	NA	NA	NA	NA	NA	NA	NA	NA	NA	NA	NA	NA	NA	NA	NA	NA	NA	NA	NA	NA	NA	NA	NA	NA	NA	NA	NA	NA	NA	NA	NA	NA	3	NA	NA	NA	NA	NA	NA	ATGGAAAGAAAAAAAGGAGATCGTGAAGGTAGTTCGTTCGAGGGACGGTTGGAAATTTGGAAAAGGAATTGGATTTGGGGAACGGATACGATAGTGGATACGATAGTTCAAAATAGAGAGGTAGAAAGGAAATTCGGTAGCAGTAGAGAGGGTGATAAAAGGTATTCCATCCAGTATTGCGACGTATTAATCAACTTAGTCCCACCAGCGATCCTTCAGATCCTTCCTCGATCTTGTACAATTAAGAGAGGTACAAGTTTAATTCTGGACCATATGGCAGCTTAA
374	ADOR3B81287	NA	NA	NA	NA	NA	NA	NA	NA	NA	NA	NA	NA	NA	NA	NA	NA	NA	NA	NA	NA	NA	NA	NA	NA	NA	NA	NA	NA	NA	NA	NA	NA	NA	NA	NA	NA	NA	NA	NA	1	NA	NA	NA	NA	NA	NA	ATGGAGGATTTGGTGGATTTGGATCTAAGATGGATCTCATTTGAGAACTTGGAATTTGGAATTTTTAAAGATTTCGTTTGTGGTAATGATTTTTCTGTAAATAAGGGTGGAGATATTTTTTATCAATTAAGAGTTTTAGGGGGTTTGTCTTTGGATTTAAGGTATTGCGAGCTTTTGAGAATTTGGAAATATTTTTAA
375	ADOR3B81294	NA	NA	NA	NA	NA	NA	NA	NA	NA	NA	NA	NA	NA	NA	NA	NA	NA	NA	NA	NA	NA	NA	NA	NA	NA	NA	NA	NA	NA	NA	NA	NA	NA	NA	NA	NA	NA	NA	NA	1	NA	NA	NA	NA	NA	NA	ATGTTAGATTTTAAAGATTGGGTGGAATTGAATACAATAGAAGGATTAATTGGGAGAAGAAATTGTAATGGTGGATATTTAAGTGTAGAAATGCGTGGAACTTCATTCCATTATTTTTACGTTAATTCCATCGTATCGGAGATACCATTAAACGATACGAGTAAAGCATCTGAAAAAGTGTTAAAAGCTAGCGGGGTATTATCTCTGTAA
376	ADOR3B81315	NA	NA	NA	NA	NA	NA	NA	NA	NA	NA	NA	NA	NA	NA	NA	NA	NA	NA	NA	NA	NA	NA	NA	NA	NA	NA	NA	NA	NA	NA	NA	NA	NA	NA	NA	NA	NA	NA	NA	1	NA	NA	NA	NA	NA	NA	ATGAACGAAAGAAAAAACGAAAAAAGAAAAAGAACAAAGGAAAAAGAAGAAGAAGAAGAAGAAAAAGAAGAAAAACAAGAAGAAGAAGAAGAAGAAGAAAGGGAGAAGAAGAGGAAGAAGAAGAAGAAGAAGAAAGGGAAAAAGAAAAAGAAGAAAGAGAGAAGAAGAAGAAGAAG
377	ADOR3B81321	NA	NA	NA	NA	NA	NA	NA	NA	NA	NA	NA	NA	NA	NA	NA	NA	NA	NA	NA	NA	NA	NA	NA	NA	NA	NA	NA	NA	NA	NA	NA	NA	NA	NA	NA	NA	NA	NA	NA	1	NA	NA	NA	NA	NA	NA	ATCAAAAGCAGATCAGAATTTCCGCTTTCTTCGGCAGAATTCGACGAAAAAATTTATTCAAAATCAATCGATTTTCGATTAATAATTTTTCAGAAAAAAGGAAAAGGAACGATTATATATAACGATATCCTCTCGATAGCGAAATCCTCGACCGATTCAAACTACGACACACGATTCGTACGATACGATCCTGATAAAAATCGAAGTCGATTCTTTTCAGAGGGTCAACGAATCCCGACAAG
378	ADOR3B81334	NA	NA	NA	NA	NA	NA	NA	NA	NA	NA	NA	NA	NA	NA	NA	NA	NA	NA	NA	NA	NA	NA	NA	NA	NA	NA	NA	NA	NA	NA	NA	NA	NA	NA	NA	NA	NA	NA	NA	1	NA	NA	NA	NA	NA	NA	ATGTGGATGATTGACTACGACTATATCGACAGTTATTATATCAAGATAACTGATTTTTTACGCTGGCTAGAAATAATAGAAATTGAATTTGCAAGAATATACAAGCTAAAAAGAAGATACAAGCATCTTGTACCGTCGATGCAGGTTCAATCACAGAGTACAAGTACAAGTCCAATGGCGTAA
379	ADOR3B81343	NA	NA	NA	NA	NA	NA	NA	NA	NA	NA	NA	NA	NA	NA	NA	NA	NA	NA	NA	NA	NA	NA	NA	NA	NA	NA	NA	NA	NA	NA	NA	NA	NA	NA	NA	NA	NA	NA	NA	1	NA	NA	NA	NA	NA	NA	ATGGAACGGGAGGACGGAGGAAGAAGGCGAGATGTAGCGTTGGATGCGTACAGAGGAGGAAGACGAGCATCCTGTGGACGGATGGATGCAGAAATTTGCGAGAGAGAGAGAGAGAGAAGGAGCGAACGAACGCGGTGCGGAGAAGGAAGAGCTAGGTCCCAGTGGTGGGATAGATACGGAAACAGTATTAGAAAGAGAGAGCGAGAGAGAAAATTGGTGAAGGTGCACGAGGAAGAGGAAGAAGCCTATCCAGTTGGGATAGGTGGAGAAATGACGGCGAGAGAAAGAAAACGAGCCCGATGCGCGAGAGAGAAAGAAGGACGAACTCGGTAA
380	ADOR3B81345	NA	NA	NA	NA	NA	NA	NA	NA	NA	NA	NA	NA	NA	NA	NA	NA	NA	NA	NA	NA	NA	NA	NA	NA	NA	NA	NA	NA	NA	NA	NA	NA	NA	NA	NA	NA	NA	NA	NA	1	NA	NA	NA	NA	NA	NA	GGGGCATAAGTTTGGCGAGGAAGCGAGCGAGCGTGACGTCGAAGCTCGAATTAATGCTCGAAGTAATTCAACGAGGCTGCGGGCAGCCAGGGGCGAGGGGGTGGAGTTTGGGCAACAAAACATTGGCTCGTTATCGGCAAGCGTATTGCCGTCGCCGAGCCGGCAAGAACCGTCCAAGATAAATATCGATCCCCCTCCCTCCTTTCCCCCCCTCTTGAATGGACGCTCTCGCGTCAAACCGCGTCGCGTCTCGAATCTCCTCGATCCTC
381	ADOR3B81346	NA	NA	NA	NA	NA	NA	NA	NA	NA	NA	NA	NA	NA	NA	NA	NA	NA	NA	NA	NA	NA	NA	NA	NA	NA	NA	NA	NA	NA	NA	NA	NA	NA	NA	NA	NA	NA	NA	NA	1	NA	NA	NA	NA	NA	NA	AGGAAATGTAAAGGAAATTCAAATTCGAGAGTCCTCCTGTTAGGAAAAGAATCGTCGATTTTCGATGGATCTTCGCTCGGAGGGAAGAAGCCGGAGCTTGCAATAATCGGGGAGGATTTAAAGAGTGGGCTCGAAGCGGCGAAAAGAAAGAAAAAGGGAGAATCGATAAAGCGTATCCGGGGGTTGAAATTGCATGTTATTACGAGAAAGCAGCGAAATGAGACGTTATTTTCTCCTGGAATTTCGTATATGCGCGCCGTGAATCTTATTAACCATCCGAGCGGCAACCGAAAACACCGCTCTCTCTCTCTCTCCCTCTCTCCCTCCTCCCTTCATAATTCGACGATTTACGACGTGCCGC
382	ADOR3B81355	NA	NA	NA	NA	NA	NA	NA	NA	NA	NA	NA	NA	NA	NA	NA	NA	NA	NA	NA	NA	NA	NA	NA	NA	NA	NA	NA	NA	NA	NA	NA	NA	NA	NA	NA	NA	NA	NA	NA	1	NA	NA	NA	NA	NA	NA	ATGGAAGGAAAAAAGAGAAAGGTGAAAGAACTTGTGCCGCTTCCCGCGAGAAACGAAGGAGCCGCACAAAGAGGAGGGAACAGGAAGAGAGAAGATGGTGTAAAATTGAAAGTACAAGTCGGTAGAGTTTCATTAACAGCGGAGGATGTCGCGCCGTACGTTGCTGGAACTTGCCAACTTTAA
383	ADOR3B81358	NA	NA	NA	NA	NA	NA	NA	NA	NA	NA	NA	NA	NA	NA	NA	NA	NA	NA	NA	NA	NA	NA	NA	NA	NA	NA	NA	NA	NA	NA	NA	NA	NA	NA	NA	NA	NA	NA	NA	1	NA	NA	NA	NA	NA	NA	ATGGAAACGGGCGCAGAGATTCGCAAAGAGGCGCGTTGCCCAAACTTGTCTTCTCCTTTTGCTGTTACTCCATTTACTCGCCACGGATTTATCGCCTCGACCGCGCGAAAGAGAACGGTAACGAGGCCGTGGCGTTCTGTGAAATTGATTCCCGGGGCGGAGAGGGAAATTCCGGGGAAAAACGGGACACGTGTCCAATCGTCGCCTCTCCTCTTCCTTCCTTTCTTCCTTCGCGCCACGGAGATTTATGCCACGGCGTCTCGCGAAACCGCCTCTCCAGAATACCTTGATCGGTGCGTGCTCGTTTCGCGTTCGTTCGAAGATCTCTCGTTCGAGCAGTCCTCGTTGCCCGAGAAGTGA
384	ADOR3B81361	NA	NA	NA	NA	NA	NA	NA	NA	NA	NA	NA	NA	NA	NA	NA	NA	NA	NA	NA	NA	NA	NA	NA	NA	NA	NA	NA	NA	NA	NA	NA	NA	NA	NA	NA	NA	NA	NA	NA	1	NA	NA	NA	NA	NA	NA	ATGGGGGGGGGAAGGTTGGTGAAAGGTGGACGCGGCGGGTTACCTTTCCACTTTTCATCCGTGGCGGAAAACAAGGGGAAGCGGAAGAAGAAACGAGAAGTGGGCGGGAGGGAAGTGGGTGGAAAACGTAGAACAGCGGCAACAACAAACAGGCAGAAGCACCGACTAGCCGGGAGCGGTATCAGCCCGAAAGAAGACGAAGAAGAAGAAGAAGAAGAAGAAGAAGAAGAACGCGGTGAGGAACACGAGGATCGTATTGAAAAGTTTCGCGGGGGCGCGTCTCATTTTCAAATTACTGGGCGCCGAGATCTGGGTGGAGAGAAGCGGAAAGGAAATGGAAAAAAAGGGAAAGGAGGGGGAAGGAATAAGGGCACATTTTAA
385	ADOR3B81363	NA	NA	NA	NA	NA	NA	NA	NA	NA	NA	NA	NA	NA	NA	NA	NA	NA	NA	NA	NA	NA	NA	NA	NA	NA	NA	NA	NA	NA	NA	NA	NA	NA	NA	NA	NA	NA	NA	NA	1	NA	NA	NA	NA	NA	NA	ATGCCTGGTTACATGAACTTACGTTCTCCCAATATCTTTCCACTTTTCCTCATTTTCACTCGCGAATATAACTCGAATATCCAACCAAAATTATTAAACCAAATCGCCAAGTTGAATCCGACCAACCATCCCTTCCAAGATTCGCGAGGTCCTCCCAATAAAACAAAGATTCGTATGCTCGTATCGAAGGTGTTTATGGTTCGTAAAACGAACGGAAAGAAAAAAGAGAGAGGAAGAGTTAAAGCAGAAGACGAAACTGGCCGTTTCCGCGTTATTCGATCGTTGTTCGTCGCTGGATTTCCAGGATCATTAGGCGAGATATCTCAACTTCGCGAATCGAAGGAGGAGGGGGGAGAAAGAAAGGAGGAGAAACGCCGAATGTCGAACAACAAATTGTTC…
386	ADOR3B81364	NA	NA	NA	NA	NA	NA	NA	NA	NA	NA	NA	NA	NA	NA	NA	NA	NA	NA	NA	NA	NA	NA	NA	NA	NA	NA	NA	NA	NA	NA	NA	NA	NA	NA	NA	NA	NA	NA	NA	1	NA	NA	NA	NA	NA	NA	ATGGTGGAGGGCGAGAGACGGAAGGATACGCACAATGAAGGAGCGGAAACTCGAGCCGATCCGGCAAGCGTCTTCGGCAACAGCAACAACAACAACAACACAACCGAGCCAAGATCTCGTCCAATGAGCGAGCTTAAAGAGAAGAAGAGGAAAAAGAAGAAGAAGAAGAAGAGAGAAAGGGTGGAAGAGGAAACAGAAGCAAGGAGGGAAGGATAG
387	ADOR3B81365	NA	NA	NA	NA	NA	NA	NA	NA	NA	NA	NA	NA	NA	NA	NA	NA	NA	NA	NA	NA	NA	NA	NA	NA	NA	NA	NA	NA	NA	NA	NA	NA	NA	NA	NA	NA	NA	NA	NA	1	NA	NA	NA	NA	NA	NA	ATGGAAGCTGCGGTGCGGAGGCGAGAGCGACAACGGGTTAAAGGTGGCCGACTTCACGTGGCGCAAAGTCATGGCGCGACACCGCGATCGACCGTGAACGATACTCGAGCACGGCGGCCGCTTGATCCGAATGCCAAGTGTGCAAATATTGACGTACGGTTCCGAATGGGTGCTCGAGCGAACGCGGCAGGAAAAATCGTTCGAGTGGATTCGCGCTTTGGAGAAAAACGCATCGAAAACGAGCCTGTCGATCTTCTATTTCGAATTCCTTCGAATCGAATTGAATATAGCGAGGGTAAGAAAACACGAGGCGCCTCGAGGATGAAAAATCCTCGACGCACCTTTTCGAGATCCTTGGATCTCGAAAAGGTACAAATTATATTTATTTCGATGGAATGC…
388	ADOR3B81373	NA	NA	NA	NA	NA	NA	NA	NA	NA	NA	NA	NA	NA	NA	NA	NA	NA	NA	NA	NA	NA	NA	NA	NA	NA	NA	NA	NA	NA	NA	NA	NA	NA	NA	NA	NA	NA	NA	NA	1	NA	NA	NA	NA	NA	NA	ATGGAGGCCCTCTACAGGCCAAAATCTAAACTAATTTCTTCCTTTGAGAAAAATCTTGGTACAGATTACTTTGAAATTACTTTGAAGAAGATATTTTTAACTAAGATAATAAGAACTATGGAGGCCCTCTACAGGCCAAAATTTAAACTAATTTCTTCCTTCGAGAAAAGTCTTGGTACAGATCACTTTGAAATTACTTTGAAAAAGATATTTTTAATGATAAGAGCTGTGGAAGTCTTCTATAGGTCAAAATCTAAACTAATTTCTTCCTTTGAGAAAAGTCTTGGTATAGATCACTTTTAA
389	ADOR3B81376	NA	NA	NA	NA	NA	NA	NA	NA	NA	NA	NA	NA	NA	NA	NA	NA	NA	NA	NA	NA	NA	NA	NA	NA	NA	NA	NA	NA	NA	NA	NA	NA	NA	NA	NA	NA	NA	NA	NA	1	NA	NA	NA	NA	NA	NA	ATGGTGCTGGCCAGTCTGATCCGTGTCAAAACGATGTCGAAAAACGACACGGTGAAAATGCTGATGCCATTTCACCATTTCACGTCCTCTGCGCGTTCCTCGTGTTCCTTCGTCTTCCACGTTGATGAAATTATCGGAAATGGGCCTGATCGAGGTGAAATTCGAACACGTTTGTGCGATTTCGTTGTCACGTTGCCGAAAAACTTTGGATTAAGGATTGGTTCTCCTCTCGTGGATGACGTTCTCCCTTCGTTCAAACATCACCACATTCACCAGCTCCCTGACGAGGATCTCGAGCAAGTACGTGATTCTGGTCAACCAATTGCCAGACCGAGCGTCGTCCGCTCTTATTTCAACAATTCACATCAGTTTATCGTGGATTTGTATAACAGGTAA
390	ADOR3B81388	NA	NA	NA	NA	NA	NA	NA	NA	NA	NA	NA	NA	NA	NA	NA	NA	NA	NA	NA	NA	NA	NA	NA	NA	NA	NA	NA	NA	NA	NA	NA	NA	NA	NA	NA	NA	NA	NA	NA	1	NA	NA	NA	NA	NA	NA	ATGGATTCCAAAGGCCATGGATTCCAAAGGCCATGGATTTCAAACGCCATGGATTTCAAAGATCATGGATTTCAAAGACCATGGATTCCAAAGATCATGGATTCCAAACGCCATGGATTCCAAAGGCCATGGATTCTAAAGATCATAGATTCCAAACGCCATGGATTTCATATGCCATGGACTCCAAACGCCGTGGACTCCAAACGCCATAGATTCCAAAGACCATGGATTCCAAAGATCATGGATTCCAAACGCCATGGATTCCAAAGACCATGGATTCCAAAGATCATGGATTCCAAAGGCCATGGATTCTAG
391	ADOR3B81389	NA	NA	NA	NA	NA	NA	NA	NA	NA	NA	NA	NA	NA	NA	NA	NA	NA	NA	NA	NA	NA	NA	NA	NA	NA	NA	NA	NA	NA	NA	NA	NA	NA	NA	NA	NA	NA	NA	NA	1	NA	NA	NA	NA	NA	NA	ATGGCCTTTGGAATCCATGGCCTTTGGAATCCATGGCGTTTGGAATCAATGGCGTTTAGAGTCCATGGCGTTTGGGATTCATGGCGTTTGGAGTCCATGGCGTTTGGAGTCCATGGCGTTTGGAGTCCATGGCGTTTGGGATTGCGTGATGAAACGCGAGAACATTTTATAATTGTTAATTATGAACAATTTTCGAGCGGGGGATGGTAA
392	ADOR3B81392	NA	NA	NA	NA	NA	NA	NA	NA	NA	NA	NA	NA	NA	NA	NA	NA	NA	NA	NA	NA	NA	NA	NA	NA	NA	NA	NA	NA	NA	NA	NA	NA	NA	NA	NA	NA	NA	NA	NA	1	NA	NA	NA	NA	NA	NA	ATGAATCAAGCAAACGCAAGCAGAGAAGCGTTGAAAATTTTAAAATTTAATCGACAAAAGCGTATCAAAAATCGATTCAAAAGGATCGAAACTGTCTATCGGAGGATGGACGAGACAAAAGGCAGGGGAGAAGTGAAGATATTGAAGGGAAAATCAAAAGCCTCGAAACGTGTACAAACATTTTGCGAGCGATGGTTGGACGGATATCGAGCATCCGTGACATCCGTGAAACAACGCGAGCATTCCCGTTATCCGGGAGGACGTCGAATTGTAAACACATTACACGCGTATCCTCGCTGA
393	ADOR3B81395	NA	NA	NA	NA	NA	NA	NA	NA	NA	NA	NA	NA	NA	NA	NA	NA	NA	NA	NA	NA	NA	NA	NA	NA	NA	NA	NA	NA	NA	NA	NA	NA	NA	NA	NA	NA	NA	NA	NA	1	NA	NA	NA	NA	NA	NA	ATGGAGTTTGGATTCATCGATCCTCGAGCCCGTCTCCCCTCGTTGTTGTCGAGGAGAGGGCAGAGGTGGCCGGGTTCGCGGGTATGCGGCTGGCAGGAAGAGGAGAAGAGACCCCCCCCCATCCCTCTGCCTCGAGAAGAAGAAGAAGAAGAAGAAGAAGAAGAAGAAAGAGGAGGAGGAGGAGAAGAAGAAGAAGAAGAAGGCGCAGAAGGGAGCAGTTGGGCGCCTCCGCGTCGTAGTTATATTTAG
394	ADOR3B81396	NA	NA	NA	NA	NA	NA	NA	NA	NA	NA	NA	NA	NA	NA	NA	NA	NA	NA	NA	NA	NA	NA	NA	NA	NA	NA	NA	NA	NA	NA	NA	NA	NA	NA	NA	NA	NA	NA	NA	1	NA	NA	NA	NA	NA	NA	ATGCGAACCAACCACTCCTTCGAGAACGAAGCGAGCGAGCGAGCGAGCGAGCGAGCGAAGAAGGGACAAGCGGCCAGGCCCCTGGCTATCGAGAATAAGAGAGAGGAGGAAGAGCAAGAAGAAGAAGAACAAGAAGAAGAAGAAGAAGAAGAAGAATTGAGGAGAGGGGGGAGAGAGAGAGAGAGAGTGGGAGGAGAAAAATGA
395	ADOR3B81399	NA	NA	NA	NA	NA	NA	NA	NA	NA	NA	NA	NA	NA	NA	NA	NA	NA	NA	NA	NA	NA	NA	NA	NA	NA	NA	NA	NA	NA	NA	NA	NA	NA	NA	NA	NA	NA	NA	NA	1	NA	NA	NA	NA	NA	NA	ATGGATTTGAAAATTGCAAAGAGTCAAAAGCAAAAGGGGGAAAAAAGCAGGAGGAAGAAAGAAAGAAAGAAAGAGAAGAATGGAAGAGACGAGGGATTGGAACGTGCCAATACGATTCTTCGGGTTAGAAGTAGAAGAAAAAGGGAAATAAAGGGTGCGGGTGGGAACGAAGTAATTCTGGATGCTGCCTCGGAAAAAGAAGAGGAAAATGGAAAAGTCACAGAGAAGAAGTAA
396	ADOR3B81409	NA	NA	NA	NA	NA	NA	NA	NA	NA	NA	NA	NA	NA	NA	NA	NA	NA	NA	NA	NA	NA	NA	NA	NA	NA	NA	NA	NA	NA	NA	NA	NA	NA	NA	NA	NA	NA	NA	NA	1	NA	NA	NA	NA	NA	NA	ATGGATGCTGATTCTTGCGAAACACGCGAAACTCGAGCTTGTCGCGGTTGGAAACCGTTTGGTTTGGACTATCCACTCGAAGTTGGTGACGATACGAACGGTTTTCGTGACGAAATGGGCCAGAAACTGGGGACAGATATGTTGATGGAACAAAAAGTGGAACGATGA
397	ADOR3B81423	NA	NA	NA	NA	NA	NA	NA	NA	NA	NA	NA	NA	NA	NA	NA	NA	NA	NA	NA	NA	NA	NA	NA	NA	NA	NA	NA	NA	NA	NA	NA	NA	NA	NA	NA	NA	NA	NA	NA	1	NA	NA	NA	NA	NA	NA	ATGGCGGAATACGCGCCCCCGCCGTGGAATTGTTGCTTCGATATTTTGTCGCGGGTAAAAGTGATTTATCGTGTTGCACCGCGTCGCACGGAATTCGAAAGTTTTCCACGGCTCGCGGTGAGAGTGGGGGTGCAACAGGATTCTGTGTCTCAGAGCTTGCTGTTGTTTGCGCAAAAGTATCCACCGTACAAGAGAGCTTTGCAAACTATTGAAAGTATCGTATCTGCATCGTGTAATAGTGAAAGTATCCAGAGTTGGTTGAACAGTGAAGATATCTACGTTAAACCTTGGTAA
398	ADOR3B81424	NA	NA	NA	NA	NA	NA	NA	NA	NA	NA	NA	NA	NA	NA	NA	NA	NA	NA	NA	NA	NA	NA	NA	NA	NA	NA	NA	NA	NA	NA	NA	NA	NA	NA	NA	NA	NA	NA	NA	2	NA	NA	NA	NA	NA	NA	ATGGCTGATTCCGAGGTAAAGGGATGCTGCGGTCACGATGCAAATACTCGTATGCACGACAAGTGTATGGATTATGGTCGGTCTAATCGATTATTAAGACGTATTCTCTTTATAGTTTTTGGATTAATGGCAATTTTAAAACATAAAAGGTAA
399	ADOR3B81437	NA	NA	NA	NA	NA	NA	NA	NA	NA	NA	NA	NA	NA	NA	NA	NA	NA	NA	NA	NA	NA	NA	NA	NA	NA	NA	NA	NA	NA	NA	NA	NA	NA	NA	NA	NA	NA	NA	NA	1	NA	NA	NA	NA	NA	NA	ATGGAAAGGGAAAGAAGAAGAAGGGAGAAGAAACGATGGAGAGAACCGAAACAACTATCCTTGAAACGTTCTCGTTTTCCATCCACTGTCGGTGATAAAATTTCATTGGCCGATTACAAGAGGAAACGCGCGGAGTATAAAGTTCGCGGAGAACAGATCGAAGAATATGTTGCGAGTTTCGAAACGAAAACCGAGGCGAACGAGCGGGAAGAATTTTCGAATTCCCGCCAGAACAGAGACAAGAGGGGGATGATCTCCGGAATCGGTCGAGTGGCTCGTCACAATGTAAGAAGCGTCCCATTTGACACAGCCGCCCGATATCGTTGA
400	ADOR3B81438	NA	NA	NA	NA	NA	NA	NA	NA	NA	NA	NA	NA	NA	NA	NA	NA	NA	NA	NA	NA	NA	NA	NA	NA	NA	NA	NA	NA	NA	NA	NA	NA	NA	NA	NA	NA	NA	NA	NA	4	NA	NA	NA	NA	NA	NA	ATGATACCGCATAAGAAGTTATTACGAACAAATGGTGGCGGCAATCAAGAGAGGCGAAAAATCTTCTTAGGAGATCCTCCTCCCTTTGCCTTTGCCTTTCGAAGTTGGAAGATAACTCTTCTAGTCCCTTTCGGTAGGTCACTCGGCGAAGAGAGATGTCCAAAATTGAAAGTGTGTACCGGTTGGGAGCCTAACCTAAGTGAGCATGTAGTAGTGGTGAAAAGAAGTATAGTTGCGCCGGTTGTTCAGAGAGAGGGGAAGGAAAAGAGAAGAGAAGAAGGAGAAGAAGAAGAAGAAGAAGAAGAAGGAGATGAAGAAGAGGAGGAGGAGGAATAA
401	ADOR3B81454	NA	NA	NA	NA	NA	NA	NA	NA	NA	NA	NA	NA	NA	NA	NA	NA	NA	NA	NA	NA	NA	NA	NA	NA	NA	NA	NA	NA	NA	NA	NA	NA	NA	NA	NA	NA	NA	NA	NA	1	NA	NA	NA	NA	NA	NA	ATGTGTAAGAAGAGAGAAGAAAAGGGAAAAGAAAAAGAAAAAATAGAAAAAGAAAAAAATTTTCTTTCCTTTCGGAGTCGTCAAGTATATTTGCTCGAGAAGAAACGAGAAAAAGAAAAAGAAGAAGAAGAAGAAGAAGAAGAAGAAGAAGAAGAAAGGAGGAAAGTTCGCTCGTTGAATCTTTCTCCACTGTTCGCGTACTTCCAATTGATATATCGACGACGATAA
402	ADOR3B81457	NA	NA	NA	NA	NA	NA	NA	NA	NA	NA	NA	NA	NA	NA	NA	NA	NA	NA	NA	NA	NA	NA	NA	NA	NA	NA	NA	NA	NA	NA	NA	NA	NA	NA	NA	NA	NA	NA	NA	3	NA	NA	NA	NA	NA	NA	ATGGACGGGAGAGAGGATTTTTCGAAACTCGAACTTGTCTCGAAAGTTGTCGACGGGCAGAACAGCAGCCGCGGTTTCGCCGTCCGTCTGACGCCGTTACGCAACGCTTCTATAAGCATCCGTGATCCGCTCGGAATGTGGCCCTCTCTCGCTCCATCTCTCCCTCCGCCGCGCAGCCCCTGTCCGTCCCTCCTGTCGGTCGGCGAAGAAGAAGAAGAAGAAGAAGAAGAAGAAGAAGAAGAAGAAGAACGAGAAGAAGAGGAAGAAGAAGAGGAAAAAGAAGAAGGAACACCGACCGATTCTCTTAGTCCTCTCTTCCCTTCTTCTTCTTCTTCTTCTTCTTCTTCTTCTCTATCGAGATGGACATCTATTCGCTTTTCGCTTCGAGAAACAAAGAAA…
403	ADOR3B81458	NA	NA	NA	NA	NA	NA	NA	NA	NA	NA	NA	NA	NA	NA	NA	NA	NA	NA	NA	NA	NA	NA	NA	NA	NA	NA	NA	NA	NA	NA	NA	NA	NA	NA	NA	NA	NA	NA	NA	1	NA	NA	NA	NA	NA	NA	ATGGCGAAATATTTCGTTTCTACACGGAACGAAGATGAACTCGTCGAAAGCGAGTTATCCTCCAACATTCCATTGCGATGCTCGAGCAACGAATGGAATTGCCACTCCCCCGAATCCCGACTCGTGCGATCCCTCAGAATTGAATTAACCAACGGTTATCAACCATTCGAGGACAATGCCTCGGCTATAATTCGAGGAAAGATTCGTGCGAATGATAATTGCCTCGTGGAAAAAGAACTTCAAAGGTTATTGGAAACGAGATGCAGTCGAAAATCTATATTATATTTGTCCTTTGCTCAAGAAACTCTTGATGAATAA
404	ADOR3B81461	NA	NA	NA	NA	NA	NA	NA	NA	NA	NA	NA	NA	NA	NA	NA	NA	NA	NA	NA	NA	NA	NA	NA	NA	NA	NA	NA	NA	NA	NA	NA	NA	NA	NA	NA	NA	NA	NA	NA	1	NA	NA	NA	NA	NA	NA	ATGGTCGGTCGGTCCGTGGTCGGCGGCAGCGGCGGCGGTGTTATCGCGTCGGCCCAGATTGAATATATTTCATATGTTTTCATAACTACCGCACCCGGGCCGCGTCCGTCCCTATCTGCTCCACCTCCAGCTACACCTCCAGCAGGAGTCGCCTCCACGACGTCTGGTACGGCGAGGGGGATGGAAAGACCTCTCGTGCGAGCGACGAGGAGGGAAGAAGCGAGGCTAGGAAGGCTAGCGAGGCTAGGAGAAAGAAGAACGAACGATGAACCGAGGGAGAAACGATATTCGATCGGAGGAAAAGAGAGAGGTGGATGA
405	ADOR3B81469	NA	NA	NA	NA	NA	NA	NA	NA	NA	NA	NA	NA	NA	NA	NA	NA	NA	NA	NA	NA	NA	NA	NA	NA	NA	NA	NA	NA	NA	NA	NA	NA	NA	NA	NA	NA	NA	NA	NA	1	NA	NA	NA	NA	NA	NA	ATGAGAAACGACAATCGTAAAGTTGGTGAATTGGGTCTCGATAGTGGACCGATTTCTTTGGAGTTTTCGATTTTTGACGTTTGTGGAAAAGTGTCGAAGTTGCAAGCTGAATTTGGTTTAGTTGACATTTCGTTGATGTTTCGTTCGATAGTGGAGCGATTTCTTTGGAGTTTCTTCTTAAGTTTGGAGTTTGTTGTATATGGAAGTGTCGAAGAGATTGAACAGGTTAGGGGATGA
406	ADOR3B81478	NA	NA	NA	NA	NA	NA	NA	NA	NA	NA	NA	NA	NA	NA	NA	NA	NA	NA	NA	NA	NA	NA	NA	NA	NA	NA	NA	NA	NA	NA	NA	NA	NA	NA	NA	NA	NA	NA	NA	2	NA	NA	NA	NA	NA	NA	ATGGAGGTGGAGGTGGATAAAGAAGATAAGGACGTGGAGGTAAAAGATGAGGCGAATGTAGAAAAGGAGGTGGCGATGGAGGTGGTGAAAGAGGAGGTGGAAGTGGAGATGGAGATGGCGGTAGAAGTAGAAGAGAAGGTAGTGGAGGAGATGATGGCAGAGAAGGGATTTAAGAAGAGGGATAAGGAGGGGGAAGTGGATGAAGAAGATAAGGAGGTGAGATGGGGAGGAGGAAAAGTAGAGGTGGAAGGAGGAGAATGA
407	ADOR3B81479	NA	NA	NA	NA	NA	NA	NA	NA	NA	NA	NA	NA	NA	NA	NA	NA	NA	NA	NA	NA	NA	NA	NA	NA	NA	NA	NA	NA	NA	NA	NA	NA	NA	NA	NA	NA	NA	NA	NA	3	NA	NA	NA	NA	NA	NA	ATGCGAGAAGAAGAAAAAAAAAAGAAGAAAGGAGAAAAAAGAAACCGCTCACGAATCCCTGAAACTCTTCCGTCACATTTTCCCCCAGCAACAGAGGAGGAGGCGGAGAAGAGGATGAAGAAAAGAGGTCCTCCTGAGAAGGAGGAGGAAGAGGAGGAGGAAGAGAAGGAGGGAGAAGAGGAGGAGGAGGCGGCGAAGGAGGAAGAGACGGTGGAGGAGGAGGAGGAGGAAGAGAAGGAGGAGGCGAAAGAGAAGGAAGAGGAGGAGGAGGGGAAGGAAGAGAAGGAGGATGAGGAGAAGAAGAAAAAGGCGGAGAAAAGAAGGCAAAAGAGGAGGATGAAGAGGAGACAGAGGAGGAAGAGAAGGAGGAAGAGACGGCGGAGAGAAGAAGGCAAAGAA…
408	ADOR3B81480	NA	NA	NA	NA	NA	NA	NA	NA	NA	NA	NA	NA	NA	NA	NA	NA	NA	NA	NA	NA	NA	NA	NA	NA	NA	NA	NA	NA	NA	NA	NA	NA	NA	NA	NA	NA	NA	NA	NA	1	NA	NA	NA	NA	NA	NA	ATGAGGAGAGGAAAAGGAGGAGAAAAAGCAGGAGGAGGAAGAGGAGGAGGAGGAGAGGAAGAGGAGGAGGAGGAGAGGAAGAGGAGGAGGAGAAGAGGAAGAGGAGAGGAGAAGAGGAGAGGACGAGGAAGAGGAGGAGGAGAAGAGGAGAGGAAGAGGAAGAGGAGGAGGAGAAGAGGAGGAGGAGTAGGAGAGGAAGAGGAGGAGGAGGAGGAGGAGGAAGAGGGATCGCAACAAAACAGCCTTCGAGAATTAATTTCGCGCGTATAA
409	ADOR3B81481	NA	NA	NA	NA	NA	NA	NA	NA	NA	NA	NA	NA	NA	NA	NA	NA	NA	NA	NA	NA	NA	NA	NA	NA	NA	NA	NA	NA	NA	NA	NA	NA	NA	NA	NA	NA	NA	NA	NA	1	NA	NA	NA	NA	NA	NA	ATGAAAGAGGAGGAGGAGAAGAGGAGGATAGGAGGAGGAAGAGGAGGAGGAGGAGGAAAAGGAGGAAGAGGAGGAGGAGGAAGAGGAGGAGGAGGAGGAAGAGGAGGAAGAGGAGGAGGAGGAGGAGGAAGAGGAGAAGGAGGAGGAAGAGGAAGAGGAGGAGGAGGAGGAGGAGGAGGAGGAATAGGAGGAGGAGGAGGAGGGGGAGAGGGAGGGGGGAGGGGAAGAGGAGGAGGAGGAGGAGGAGGGGGAGGGGGGGGAGGAGGAGGAGGGGGAGGGGGAGGAGGAGGAAGAGGAGGGGGGGGAGGAGGAGGAGGAAGAGGAAGAGGAGGAGAAGGAGGCGGAAGAGGAAGAGGAGGAGGAGGAGGAGGAGGAGGAGGAATAGGAGGAGGAGGAGGA…
410	ADOR3B81492	NA	NA	NA	NA	NA	NA	NA	NA	NA	NA	NA	NA	NA	NA	NA	NA	NA	NA	NA	NA	NA	NA	NA	NA	NA	NA	NA	NA	NA	NA	NA	NA	NA	NA	NA	NA	NA	NA	NA	2	NA	NA	NA	NA	NA	NA	GAAGACAAGAGAAGAAAAAGAAGAAGAAGAAAAGCAAGAAGAAAAAGAAAAGGAAGAAGAAGAAGAAAAAAAGAAGAGGAAGAGAAAGAAGAGGAAGAAGAAGAAGAAAAAAAAGAAGAGGAAGAGAAAGAAGAGGAAGAAGAAGAAAAAGAAGAAGAAGAAGAAGAAGAAGAAGAAGAGGAAGAAGAGGAAGAAGAGGAAAAAGAGGAAGAAGAGCAAGAAAAGGAAAAAAGGAAGAAGGTCAAAAAGGGGAAGAAAAGGAAGAAGGAGAAGAAGAGGAAAAAGAAAAAGAGGAAGAAGAGGAAAAAGGGGAACAAGGGGAAGAAGAGGAAGAAAAGGAAGAAGAGGAAAAAGGGGAAGAAGGCGAAGAAGAGGAAGAAAAGGAAGAAGAGGAAAAAG…
411	ADOR3B81498	NA	NA	NA	NA	NA	NA	NA	NA	NA	NA	NA	NA	NA	NA	NA	NA	NA	NA	NA	NA	NA	NA	NA	NA	NA	NA	NA	NA	NA	NA	NA	NA	NA	NA	NA	NA	NA	NA	NA	2	NA	NA	NA	NA	NA	NA	ATGGAGATCGAGGCGAAACAACGGAATCAGAGGAATCGGAGACGAGAACGAGCCCAACGTATGTTGGCACAGAGAGAGAGTTTGGCCACCGCAAAGCAGCAGCAGCAACAGCAACAACAACAGCAACAAACAAGGCAACGGCCGAACGACGAGGAGGACAGCCACAGCGGCGAGGACGAAGATCCTGCTGCCGAATTCAAACAAAATAATGTTTAA
412	ADOR3B81504	NA	NA	NA	NA	NA	NA	NA	NA	NA	NA	NA	NA	NA	NA	NA	NA	NA	NA	NA	NA	NA	NA	NA	NA	NA	NA	NA	NA	NA	NA	NA	NA	NA	NA	NA	NA	NA	NA	NA	1	NA	NA	NA	NA	NA	NA	ATGGAGGACTTGCGAAAACCCATAAATCCATCTATTCCAATATTCGATTATCGTTTATGTTTCATCCGAAACATTTCCTCCGTTCTCGATAAAAAAAGAAAAAAACGAAATGCAACGGACACAAAGGAAAATTTCGACCCACCTACTCTTTTTACTGGTCATCGACATCGGCGTAGGCGTAGAGAAACATCATGA
413	ADOR3B81516	NA	NA	NA	NA	NA	NA	NA	NA	NA	NA	NA	NA	NA	NA	NA	NA	NA	NA	NA	NA	NA	NA	NA	NA	NA	NA	NA	NA	NA	NA	NA	NA	NA	NA	NA	NA	NA	NA	NA	1	NA	NA	NA	NA	NA	NA	ATGTTTGGAAGCAGTGACGAGAAAAATTTAGTACAGGAGACCTCGTGCCACATGAGGGATGGTTTTCGAAGATTTTCAATTTTTTGGGTAATTTTTGAAGAATTTGAAAGAGTTTTAGGAAAAATAGTGGATAGTAGCAGGATAATTAGTGGATATTGTGTCACTTGTACAGGTTTTTGA
414	ADOR3B81524	NA	NA	NA	NA	NA	NA	NA	NA	NA	NA	NA	NA	NA	NA	NA	NA	NA	NA	NA	NA	NA	NA	NA	NA	NA	NA	NA	NA	NA	NA	NA	NA	NA	NA	NA	NA	NA	NA	NA	1	NA	NA	NA	NA	NA	NA	GTAAAACGAGAGGAACTAATGCGATAGAGGAGGAAGAAGAAGAAGAAGAAGAAGAAGAAGAAGAGAAGGAACAGAAAGAAGAAGAAGAAGGAGAAGAAGCGGAAGCTCGAATGAAAGCCGAAAGAGGGGAAGTGTGTTCACGGAGGGGGAGGAGAGGAAGGAAGAGGAATCGGCGCCGCGCGAGAGGGATGAAAATGGGTCTCTGTTCGGGGGAGGACGAGGAGGAGAAAGAGGAGGAGGAGAAAGAGGAGGATGGAAGGCAGCAGGTGGGCAGAGGAAGAGGGACAAAACGATGCGAGGGGGTTGTTCCTGGCTCGACCAACCAGAGANAGATACATACATACGCCGCGAGACGAATGGGGGAGGGTAAGTGGGGGAGGAGAGGAAAGGAAAGGAAAG…
415	ADOR3B81530	NA	NA	NA	NA	NA	NA	NA	NA	NA	NA	NA	NA	NA	NA	NA	NA	NA	NA	NA	NA	NA	NA	NA	NA	NA	NA	NA	NA	NA	NA	NA	NA	NA	NA	NA	NA	NA	NA	NA	1	NA	NA	NA	NA	NA	NA	ATGGCAGAAAGAAGAAGAAATGGCAGAAAGAAGAAGAAGTGGCAGAAAGAAGAAGAAATGATAGAAAGAAGAAGAAATGGCAGAAAGAAGAAGAAATGGCAGAAAGAAGAAGAAGTGGCAGAAAGAAGAAGAAATGATAGAAAGAAGAAGAAATGGCAGAAAGAAGAAGAAATGGCAGAAAGAAGAAGAAGTGGCAGAAAGAAGAAGAAGTGGCAGAAAGAAGAAGAAGTGACAGAAAGAAGAAGAAATGGCAGCTCGATAACACAGTTGCATATTTTCAAAAGTAAGGGATAA
416	ADOR3B81534	NA	NA	NA	NA	NA	NA	NA	NA	NA	NA	NA	NA	NA	NA	NA	NA	NA	NA	NA	NA	NA	NA	NA	NA	NA	NA	NA	NA	NA	NA	NA	NA	NA	NA	NA	NA	NA	NA	NA	1	NA	NA	NA	NA	NA	NA	ATGGCAGCAGCTGTGGAAGAACAACAAGAAGCAACCACAGAAGAAGACGATGAAGAAGAAGAAGAAGAAGAAGAAGAAGAAGAAGAAGAAGAAGAAGTAGAAGAAGAAGAAGAAGAAGAAGAAGAAGAAGAAGAAGAAGAAGTAGAAGAAGAAGAAGAAGAAGAAGAAACAAGAAAGTTTCTAGCAGAAGCGAAAGAGGAGAGGGAGCAAGGATGTAGTAGGAAGAAGTAG
417	ADOR3B81539	NA	NA	NA	NA	NA	NA	NA	NA	NA	NA	NA	NA	NA	NA	NA	NA	NA	NA	NA	NA	NA	NA	NA	NA	NA	NA	NA	NA	NA	NA	NA	NA	NA	NA	NA	NA	NA	NA	NA	1	NA	NA	NA	NA	NA	NA	ATGTTAGCATGCGGATCTTACATCCGATTCCGATCTTCGATCTTCCTCTCCCTTCCCTCCCCCCTACTGGATTCAGAAGCATCCAGCGTCCCCCAACAGCGTTCCGCTCCGGACGAGAACGCTAATCCAGCCGGGAGAATCCCGAGATCGATTCGAGAGGTGGAGAGACGAAATACGATCGCGGGGATCGCGCTACCACCACCGCCGCCGCGTCGTGGAACAATCCTGGGCGGTGGAGGGACGGGTCGGTGTACAGCGGTGTATAGAGATAAAGATCGGATCGGTGGATGTGACGGGACGGCGGAGAGGCGGCCCTCTCGTCTCCCGCCAACGTTCGTCAATCACGCGGCGGAATCGAAGACAAGCGCGGGACGCAAGAAGCATGCGCCCTCCTCGTCC…
418	ADOR3B81545	NA	NA	NA	NA	NA	NA	NA	NA	NA	NA	NA	NA	NA	NA	NA	NA	NA	NA	NA	NA	NA	NA	NA	NA	NA	NA	NA	NA	NA	NA	NA	NA	NA	NA	NA	NA	NA	NA	NA	1	NA	NA	NA	NA	NA	NA	ATGTCGGATAACTATCTGTTCGTACTCCGTAAAAAAAAACAGAAGAAAAAGAGAAAGAACGAAGAGAAAGAAAAAGAAGAAGAAGAAGTAGAAGAAGAAGAAGAAGAAGCAGAAGCAGAAGAAGAAGAAGAAGAAGAAAAAGGAAAGAGTAGAAGGAAAAAAACGTAG
419	ADOR3B81552	NA	NA	NA	NA	NA	NA	NA	NA	NA	NA	NA	NA	NA	NA	NA	NA	NA	NA	NA	NA	NA	NA	NA	NA	NA	NA	NA	NA	NA	NA	NA	NA	NA	NA	NA	NA	NA	Y	NA	1	NA	NA	NA	NA	NA	NA	ATGTGGGTCACGCGACCTACGATAGATTCTAGGTCGGCGGAATTTCCTACGAGCAATCGAATAGACGGCGAACGTGACACGATAATGGACCGTCGAAGGCGCTCGGAAATGTCAAGAGTACATCGATTACGGCAACGATATCGTCGGGTGTCCACGATGATGGCGTTTGAAGGAAGCTTGAGAAAGTTTGAGGTTGAGGGGAAAAGTGGATTTTGTTGA
420	ADOR3B81568	NA	NA	NA	NA	NA	NA	NA	NA	NA	NA	NA	NA	NA	NA	NA	NA	NA	NA	NA	NA	NA	NA	NA	NA	NA	NA	NA	NA	NA	NA	NA	NA	NA	NA	NA	NA	NA	NA	NA	1	NA	NA	NA	NA	NA	NA	ATGATCTTGACAAATGCCAAGCGTCAGTTAGTGGAGACTATCAAATCGGAGATCGAGACCGGAAGCGAGCTGACAATCGCCGAATGCACCGGTAATTCGAAGTCACTATCTCGTTTGAGCCTTGCTGATGAATACGATCTGCCAGGAGTATCAGCTAAGATCGATCCCTGA
421	ADOR3B81575	NA	NA	NA	NA	NA	NA	NA	NA	NA	NA	NA	NA	NA	NA	NA	NA	NA	NA	NA	NA	NA	NA	NA	NA	NA	NA	NA	NA	NA	NA	NA	NA	NA	NA	NA	NA	NA	NA	NA	1	NA	NA	NA	NA	NA	NA	ATGGACGAGACTTCGTCAGAATCCTCGAACATCGGAAGACTTAAGCACGACGCTCTTCCACAGAATAACGAAATATCGTTTGCTATAACACATTTGCTTCAAACTGATGTTGCGTTATCGTCAGAATCCCAGAAATGTACGCGTCATTATCGAAAGACTTCAAGTACGACGATCTTCCAGAGAGAAGATTAA
422	ADOR3B81582	NA	NA	NA	NA	NA	NA	NA	NA	NA	NA	NA	NA	NA	NA	NA	NA	NA	NA	NA	NA	NA	NA	NA	NA	NA	NA	NA	NA	NA	NA	NA	NA	NA	NA	NA	NA	NA	NA	NA	1	NA	NA	NA	NA	NA	NA	ATGGATAAGGGTGAAACAAATCGTATCGAAGGTGGAAAGTACCTCGGAGATTGGGAAGGTTGTTCGTTATCGGGAGTTGGAGAGTTATTTGTAAGCGATCGTGAAGATTGTCGGCAAGATGGGAAATCGATATGTGGAAGAATAGTTGCGTGA
423	ADOR3B81584	NA	NA	NA	NA	NA	NA	NA	NA	NA	NA	NA	NA	NA	NA	NA	NA	NA	NA	NA	NA	NA	NA	NA	NA	NA	NA	NA	NA	NA	NA	NA	NA	NA	NA	NA	NA	NA	NA	NA	1	NA	NA	NA	NA	NA	NA	ATGGCGACGAATCAAAGCTTTATCCATCAAAAATCTTCGAAGAAAAAAAAAGAAAAGAAAAGAAAACCAAAAAAATTAAAATTACATCGTACACACGCTCGACTTTTGCAAATATTCGCCGAAGAAAATCAAGAATGGAATGTCGGCAAGGATTAA
424	ADOR3B81602	NA	NA	NA	NA	NA	NA	NA	NA	NA	NA	NA	NA	NA	NA	NA	NA	NA	NA	NA	NA	NA	NA	NA	NA	NA	NA	NA	NA	NA	NA	NA	NA	NA	NA	NA	NA	NA	NA	NA	1	NA	NA	NA	NA	NA	NA	ATGTGGATAGGAAGAAAAAGAATGGGCGAAGAAGTACGACGGAAAAGGAATCGAAGAGAATCAAAGAAGAAGAAAGAATGTGGATACGAAGAAAAAGAATGGACGAAGAAGAAGTATGGGGAGAAGAGAAATCGAAAAGAAATAGGAAAAGAAAAAAGGGGGAGAAGTGTAACAGGAACAGGATCAAGAAGAAGAGAGTAA
425	ADOR3B81612	NA	NA	NA	NA	NA	NA	NA	NA	NA	NA	NA	NA	NA	NA	NA	NA	NA	NA	NA	NA	NA	NA	NA	NA	NA	NA	NA	NA	NA	NA	NA	NA	NA	NA	NA	NA	NA	NA	NA	1	NA	NA	NA	NA	NA	NA	ATGGACCAAAGTGGAATAAACCAATTATTAGTAGATAAAATAAGTAAACCAGGTATGGAACAAGACAATCATTATCAGTCGAATATAATGAATAGAATAAGAAAACCACAAAAAAAGTATGATAATCATGGACAAAGAATAGGACAATTGTCATCAGGATAA
426	ADOR3B81618	NA	NA	NA	NA	NA	NA	NA	NA	NA	NA	NA	NA	NA	NA	NA	NA	NA	NA	NA	NA	NA	NA	NA	NA	NA	NA	NA	NA	NA	NA	NA	NA	NA	NA	NA	NA	NA	NA	NA	2	NA	NA	NA	NA	NA	NA	ATGTCGAAGGTGGAAGAAAGCGACGTGTTTACAACTTGCACAGCGCTTCCTTCTCGAGAAGAAGAAGAAGAAGAAGAAGAAGAAGAAGAAGACGAAGAAGAAGAAGAAGAAGAAGTCTCTCTCTCTCGAAAACTCTTCTATACGTCCGATACAATCTTACCTACCAACTTCTTCCTCTCCTTTCCCCATCCTCCTTCGACGCTTCTCTTCGAGGAGAGAGAAAAATCTATCTCTATTCCCACCGTTATTTATCCTTCTGATTGCACTTTTGACAAATTCCCGCTCGAGGCACTCCGTTGTAAATAG
427	ADOR3B81624	NA	NA	NA	NA	NA	NA	NA	NA	NA	NA	NA	NA	NA	NA	NA	NA	NA	NA	NA	NA	NA	NA	NA	NA	NA	NA	NA	NA	NA	NA	NA	NA	NA	NA	NA	NA	NA	NA	NA	1	NA	NA	NA	NA	NA	NA	ATGTCAGTTCATGTTAGACTTAAAAACACTGAAAGTTCGCCATTTTGTACGAGGAACGGAATAGAAGAAAGAATTCTATCCATTTTGGCGCAACTTTATCCACTGCAAACGAATTTTGAATTCGATATCGCGGAACAAATTTCCGATTCTTCTCGTTTTGGATCCAAGGGACAGAAAATAGAAGATGCGCGAATTTCTCTGGAGTTCATTTCGGTCCTCGAATTTACGGCGGCGATACGAAAACGTGGAGATGATAAATCATGGAGAATTAACTTCCAATTCGTTGTTATAAATACAGTGTAG
428	ADOR3B81633	NA	NA	NA	NA	NA	NA	NA	NA	NA	NA	NA	NA	NA	NA	NA	NA	NA	NA	NA	NA	NA	NA	NA	NA	NA	NA	NA	NA	NA	NA	NA	NA	NA	NA	NA	NA	NA	NA	NA	1	NA	NA	NA	NA	NA	NA	ATGGGTTTGAAAGAAGGTGAAGCGAGCGGAGGATTTGCAGTTTTAATTGTTCGCGCCTTCTTTGCGCGTGCCGCTATTGCATCAGCAACGGGAACACATCCGAAAACCACCAACGACGTCTGTCTCAGCAACTGGAATATGTTTGGAGTTGCATGA
429	ADOR3B81643	NA	NA	NA	NA	NA	NA	NA	NA	NA	NA	NA	NA	NA	NA	NA	NA	NA	NA	NA	NA	NA	NA	NA	NA	NA	NA	NA	NA	NA	NA	NA	NA	NA	NA	NA	NA	NA	NA	NA	1	NA	NA	NA	NA	NA	NA	GCAACGGACAAGTCACAAAAACAAGAAGAGGGGAGGGGAGGGATACGAAAAAAAAAGAAAAAAAAGAAAAAAGAGAGAAGAGAAAGAGAGAGAGAGAGAGACAGAGAGAGAAAAAGAAAGAAAGAGTGAGTGAGAAACGAAAAGAAAAAGAGAGAGAGAGAGAGAAAGAGAG
430	ADOR3B81652	NA	NA	NA	NA	NA	NA	NA	NA	NA	NA	NA	NA	NA	NA	NA	NA	NA	NA	NA	NA	NA	NA	NA	NA	NA	NA	NA	NA	NA	NA	NA	NA	NA	NA	NA	NA	NA	NA	NA	1	NA	NA	NA	NA	NA	NA	ATGGTAAATAGAGATGGAACGCAGGCAAAAGGGCTCGTCTCCGCCAAGAATGTTTATCCGCCAAAATTTGCCGTGGAGATCCTCGACCCGCTTAAACGAAGAGGAGGACGTGCGAGAAGGATCGAGTTTCATCACGAGGAAAATGAGGAATCGGTTCGTTGTTTGGACGACGATAATCGCTTTGGACGACAGGTTTTTGAGGTTTCTCCGGAGAAAGGTATGAGGAGAGGTATTACAATGGAATTAAAATCGGTTAAGTTGCAAATCGGTATACGTTATTACGATAATTGA
431	ADOR3B81653	NA	NA	NA	NA	NA	NA	NA	NA	NA	NA	NA	NA	NA	NA	NA	NA	NA	NA	NA	NA	NA	NA	NA	NA	NA	NA	NA	NA	NA	NA	NA	NA	NA	NA	NA	NA	NA	NA	NA	2	NA	NA	NA	NA	NA	NA	ATGCGTTCGATTGTGTATTTCAATCGCGTATCCCCAGAAGAGGAGGAAAAGAAAGAAGAAGGAGGAGAAGGAGAAGAAGAAGAAGAAGAAGAAAAGGACATCGGTTTGGTATCGAGGGGAAGGAGAGAAGAAGAAGAAGAAGAAGAAGAAGAAGAAGAAGAAGAAGAAGAAGAAGAAGAAGAGGGGGAAAAAAGGAAAAAAATGCACAGAAAGGAGGGGTTCGATCCATTGACGCTAAACTTTCGAAGGCAACCGAGACAGAGAGAGAAGGAGAGCAGGGGATAA
432	ADOR3B81658	NA	NA	NA	NA	NA	NA	NA	NA	NA	NA	NA	NA	NA	NA	NA	NA	NA	NA	NA	NA	NA	NA	NA	NA	NA	NA	NA	NA	NA	NA	NA	NA	NA	NA	NA	NA	NA	NA	NA	1	NA	NA	NA	NA	NA	NA	ATGGAACGTCAATTTGAAGACAAAAATGCAGAGAAATACAAAGAAATTATGTATTCCAAAAAGAAAAAAACTCGAATTAATCAGAGACCAAGAGATTATTTGGACAAATTTGAAGAAATTCCAGCCCTTTTTCAAACAGTGATCTACGCACGAGACGATATAAAAAAACCAAGTACACAGATAATCGAAAGATTAATTACTGCTTTAGAAACGATACGTGAAAGAAGAATGGGAAAACTGTATCGATATCCTTTTTGA
433	ADOR3B81663	NA	NA	NA	NA	NA	NA	NA	NA	NA	NA	NA	NA	NA	NA	NA	NA	NA	NA	NA	NA	NA	NA	NA	NA	NA	NA	NA	NA	NA	NA	NA	NA	NA	NA	NA	NA	NA	NA	NA	1	NA	NA	NA	NA	NA	NA	ATGGCATTAAACGAGTCATTGTTTAACGCATTCTATGACACGTACACGATTGTACGTAAACAAGATCGTAGTAGAAAAAGCGAAAGAAAACTAGAAGAAGAAGAAGAAGAAGAAGAAGAAAAAGAAATAGAACGGAAAAGAAGAAAACGGAGAACAACGATACGTGATGAGGTTGTAGGTGTATGTGTATATGTATATACGTAA
434	ADOR3B81665	NA	NA	NA	NA	NA	NA	NA	NA	NA	NA	NA	NA	NA	NA	NA	NA	NA	NA	NA	NA	NA	NA	NA	NA	NA	NA	NA	NA	NA	NA	NA	NA	NA	NA	NA	NA	NA	NA	NA	1	NA	NA	NA	NA	NA	NA	ATGAGACTTGAAGATGTAAGCAGATATTGTAATGGTGATGGTGGTAACGCTGGAACTCATTCAAATTCGAATTATTTATTGGGAACCGATGGTATGCTATCGACGATGATATTATCGACGATGAGATCTACAGAAACGCACGAGTACGAGTATCATTAG
435	ADOR3B81667	NA	NA	NA	NA	NA	NA	NA	NA	NA	NA	NA	NA	NA	NA	NA	NA	NA	NA	NA	NA	NA	NA	NA	NA	NA	NA	NA	NA	NA	NA	NA	NA	NA	NA	NA	NA	NA	NA	NA	2	NA	NA	NA	NA	NA	NA	ATGGATTATTACAGGATGGGTATCGAAGCTCCGATACACGGGAGAGAAGAGGAAAAAGAGGAAGAGAAAAAAGAAGAGAAAAAAGAAGAAGAAAAGGAAGAAGAAGAAGAAGAAAAAGAAGAAGAAGAAAAGGAAGAAGAAGGAGAAGGAGAAGAGGAAAAAGAAAAAGAAGAAGAAGAAGAAAAGAAAAAAGAAGGAGAAAAGAAAGAAGGAGAAGGAGAAGAGGAAAAAGAGGAAGAGGAAGAAGAAGAGGAAAAAGAAAAAGAAGAAGAAGAGGAAGAAGAAAAAAGAGGAAAAAAAAAAGAGAGAGAGGAAAAGAAATTATCGAGCTGTCAGCAGAGAGAGACTCGAGGCATTGAGACACTGTTGTTTTGA
436	ADOR3B81669	NA	NA	NA	NA	NA	NA	NA	NA	NA	NA	NA	NA	NA	NA	NA	NA	NA	NA	NA	NA	NA	NA	NA	NA	NA	NA	NA	NA	NA	NA	NA	NA	NA	NA	NA	NA	NA	NA	NA	2	NA	NA	NA	NA	NA	NA	GTTGGATGCGATCGAATACGAATTACGCACTTTCCCGCCCGATAAAATCCGTGGCTCGAAATTTTTCTCACGTCCCACCAACCGGATCATTGACACGCTTCTTCTTCTTCTTCTGCTTCGTGTTGTTATACAATTACTTGGTTATTGTATATAATTACCATCAAGCTTCATTATTTCCTCGATCAGTATTTATTATACAGCTATCTTATCAATTGTATCATGTTTCAACTATCACCGTGTTGTTATTTCATCGAAATTTCGATATTTCATTTTTAACATTAATGTTTATTCTGATTTCTTTTCTGGTCACCCAGAA
437	ADOR3B81678	NA	NA	NA	NA	NA	NA	NA	NA	NA	NA	NA	NA	NA	NA	NA	NA	NA	NA	NA	NA	NA	NA	NA	NA	NA	NA	NA	NA	NA	NA	NA	NA	NA	NA	NA	NA	NA	NA	NA	1	NA	NA	NA	NA	NA	NA	ATGGCTGCCTTAGGAGCGAAGAAGGACTATGAATTATTTACAGTCTCGTTAAATTTATTTATTGCGATGATTTATGAAGAGTTGGACGTATTTGCTATGATATTTCACGGGAAGCAATGGTATAAAATAAATATGGATATCGAGAAAAATAGTATCTTTCTAATGGATAAAGATGCTATACGAAATTGCGGACTTTTTTATCGTTAA
438	ADOR3B81681	NA	NA	NA	NA	NA	NA	NA	NA	NA	NA	NA	NA	NA	NA	NA	NA	NA	NA	NA	NA	NA	NA	NA	NA	NA	NA	NA	NA	NA	NA	NA	NA	NA	NA	NA	NA	NA	NA	NA	1	NA	NA	NA	NA	NA	NA	ATGGATTATTTCTTTCTTTTTTTACCACCATTCCACGTTGATTGGAATTTGATTGAACTTGGTTTTATGTTATGTCTGACAGGCACGAAAGGGTTAAAGAAATTAAAAATTGCGAGCGAAAGATTGGTCGCTGAAGCAACAAAATGGAGTGTTGTTTCAGAAATTTCACTATTTGAACGTATATCTAGAGATATTGAAGATTGA
439	ADOR3B81685	NA	NA	NA	NA	NA	NA	NA	NA	NA	NA	NA	NA	NA	NA	NA	NA	NA	NA	NA	NA	NA	NA	NA	NA	NA	NA	NA	NA	NA	NA	NA	NA	NA	NA	NA	NA	NA	NA	NA	1	NA	NA	NA	NA	NA	NA	ATGCGTAAGAACATTGGTCTTGGAATGACTCTTGTGATGCAATCAAGTGTATTGTCGCAACCAAGAGTTCGAACCAAGATCGTACTCTTCTCAGTACGTACTATCACCCTTTTACGTTACGTTAAGTTTCGAAACTGCAGTTACAGTGGTGGACAATTACGGAGTTGGAAAAATAAAAGAACGGAGGTTGTTGTAGAACGTAACCGTCCATAA
440	ADOR3B81686	NA	NA	NA	NA	NA	NA	NA	NA	NA	NA	NA	NA	NA	NA	NA	NA	NA	NA	NA	NA	NA	NA	NA	NA	NA	NA	NA	NA	NA	NA	NA	NA	NA	NA	NA	NA	NA	NA	NA	1	NA	NA	NA	NA	NA	NA	ATGGCTGTCCCTGGGAAGTCTATAACGAGTTTCGAGTCCCCTCCTCTCTTCCTGCCTCTCATTTGGTGTCTCATGGCGTTGAGAGTTTTAAGTCTAATGGGTGCAAACGATCATTGGACGATCGGTGGATGGAGGGACACGTTGGACAGTTTCAACTGGCAACTTCGAAACGATACATTCATTCGCGTCGTGAACGAAACTCATTGTTTTCGTGAAGAGAGGGACGCGAATGGCAGACTCTGA
441	ADOR3B81691	NA	NA	NA	NA	NA	NA	NA	NA	NA	NA	NA	NA	NA	NA	NA	NA	NA	NA	NA	NA	NA	NA	NA	NA	NA	NA	NA	NA	NA	NA	NA	NA	NA	NA	NA	NA	NA	NA	NA	2	NA	NA	NA	NA	NA	NA	ATGCGCGCAGGTGCGAGCCAAGCTTTGCCTTCGTACCTACCCGGTGCACGAGATGGAAACGCAGGTATTCGAGATTCGGTGAAACGAGAAGAAGGTAAACAGAGACGATCGAGAGAGAACATCGACGAAGAAGAAGAAGAAGACGAAGAAGAAGAAGAAGAAGAAGAAGAAGAAGAAAAAGAAGGAGGAGAAGAAGCGGACGACGAAGCGGTGGAGGTGGAGGGCATTCGATGCGAGTCGAGTGCGTTGACCTTAGGATTCGATGCGCGTCCTTGA
442	ADOR3B81692	NA	NA	NA	NA	NA	NA	NA	NA	NA	NA	NA	NA	NA	NA	NA	NA	NA	NA	NA	NA	NA	NA	NA	NA	NA	NA	NA	NA	NA	NA	NA	NA	NA	NA	NA	NA	NA	NA	NA	1	NA	NA	NA	NA	NA	NA	ATGGTGGGAGAGAAGATGGATCTGGGAAAAATAAGGTCTCGAGGTGTCGCGAACGGGCGACGGAGGAATTGGAAAAATGTGGCAGCGTGTAGGTTCCGTTTGGGAAGAGTGTCGCGCGCGGGGTGTCTCTCGGAAAGGAAGAATCGAAGGTGGCGAGGGAAAAAGCGGCTCGGAAACAGGCTCGTCGACGAGGGAACGTCGGAATGGTGCGTCGCGTTGGACGAGCGTGATTCGCGGGAACGGTCTCGGAATCGATGGATCGGCGATGATCCACCTCTATTTCCATATTTCGCGCGACCGGTGGAGGCTTTGAGAAGAGCGGCGGCAGAGGTCGGTCGCCGTGTATCCCGGCCCGTTCGTTGGCCTTTCCTTTCGGATTTGATTTCCTTTCGAATCCAC…
443	ADOR3B81698	NA	NA	NA	NA	NA	NA	NA	NA	NA	NA	NA	NA	NA	NA	NA	NA	NA	NA	NA	NA	NA	NA	NA	NA	NA	NA	NA	NA	NA	NA	NA	NA	NA	NA	NA	NA	NA	NA	NA	2	NA	NA	NA	NA	NA	NA	ATGCTCAGAGCGGGCCCTTGTGACGTGGGCGTGGGTGGTTGGGGATGTGGCAGGCTTGAGCCGGCTGGTGATGAACCGCCCCCAACGTTACCCCACGGTGATGATGACGATTGTGCTGTTGATGATGATCCTGATGGGCCGTTTGTTGATACGATTGTTGCTGTTGCTGGTGGTGGTGCTGCTGCTGGTGATGGTGATGATGATGATGATGATAGTGCTGATGACGATGCTGCGTTTGCTCTGCAACCACCGAGTTGA
444	ADOR3B81705	NA	NA	NA	NA	NA	NA	NA	NA	NA	NA	NA	NA	NA	NA	NA	NA	NA	NA	NA	NA	NA	NA	NA	NA	NA	NA	NA	NA	NA	NA	NA	NA	NA	NA	NA	NA	NA	NA	NA	2	NA	NA	NA	NA	NA	NA	ATTCTCGCATCGACCACCTTCGAATCAAGGACGAAAGGTGCCAAGGATCGATAATTTTGATAGAAGTAACAAAACTTCAACGTTACGACGACAACGTTGGAGGCGTCAACTACAACAGCAAAGGAAAACGGCGTGGCAACGGAAGCAGCAAATCTAA
445	ADOR3B81707	NA	NA	NA	NA	NA	NA	NA	NA	NA	NA	NA	NA	NA	NA	NA	NA	NA	NA	NA	NA	NA	NA	NA	NA	NA	NA	NA	NA	NA	NA	NA	NA	NA	NA	NA	NA	NA	NA	NA	3	NA	NA	NA	NA	NA	NA	ATGTTACGAAAATCTGGTCTGGTCGGCGAGCTTAACGTTAACAACGTTAACAATTCGGACTGGCATCGTCCACCACCAGGAGGGAAAAAAGAATTTCCGCGAGCGGGCTGCGGCGGCGATGGTGGTGTTGGTGGTGATGGTGGTGGTGGTGGTGGTGCAGGTGGTGGAGGTGGAGGTGGAGGTGGAGGTGGAGGTGGTGGTGGTGGTGGTGGTGGTGGTGATGGTGGTCCTGGGATCGAATACGAATATATTATATATCCAACGAAAATTCATCCGATGGAACGAGGGTGA
446	ADOR3B81718	NA	NA	NA	NA	NA	NA	NA	NA	NA	NA	NA	NA	NA	NA	NA	NA	NA	NA	NA	NA	NA	NA	NA	NA	NA	NA	NA	NA	NA	NA	NA	NA	NA	NA	NA	NA	NA	NA	NA	1	NA	NA	NA	NA	NA	NA	ATGACACACGGCGTAGGAAGGAGCGGTAGAATAAGACGAAGAAGGAAGAGAGGAAGAGCGGAAGAAGAAGCCGAAGAAGAAGAAGAAGACGAAGACGAAGAAGAAGAGGACGACAACGATGACGACGACGACGACGACGACGGCGACGACGAAGACCAAGAAACGGTCGGCTTCCTCTGA
447	ADOR3B81721	NA	NA	NA	NA	NA	NA	NA	NA	NA	NA	NA	NA	NA	NA	NA	NA	NA	NA	NA	NA	NA	NA	NA	NA	NA	NA	NA	NA	NA	NA	NA	NA	NA	NA	NA	NA	NA	NA	NA	3	NA	NA	NA	NA	NA	NA	ATGATGATAATAGGAACAGGAATAGGAATAGGAGTAGGAATAGGAGTAGGAGTAGGAGTAGGAGTAGGAGTAGGAGTAGGAGTAGGACATAATGATCATAATAATGATCATAATGATTATAATAATAATAATAAAGATAATGTTAATGATGAAACAGTAGTAGTAGTAGCAGTAGTAGTAGTAGTAGTAGTAGTAGTAGTAGTAGTAGTAGTAGTATTAGTAGTAGTAGTAGTAGTAGTAGTAGTAGTAGTAATAGTAGTAGTAATAGTAGTAGTAGTAATAATAATAATAATAATAAAAGTATAA
448	ADOR3B81726	NA	NA	NA	NA	NA	NA	NA	NA	NA	NA	NA	NA	NA	NA	NA	NA	NA	NA	NA	NA	NA	NA	NA	NA	NA	NA	NA	NA	NA	NA	NA	NA	NA	NA	NA	NA	NA	NA	NA	1	NA	NA	NA	NA	NA	NA	ATGGCTCCTCGGTTAGCGTTAAATTTAACCGTATTGGCAGGGTTGTGCAGCGACGTTGATGCGGCGTGTCGCATATTCGAGTGGCTCGACGTAAATATGGGCTTCACAAGAAAATGGCCGCCAATGATGCAAGCCGATTTAAGTGGTTTTGTTAACTCTTTGTTGGTTTCAAACAATTCCCTCAATTGTTTCGATCCGAAAATATTCGCTTAA
449	ADOR3B81728	NA	NA	NA	NA	NA	NA	NA	NA	NA	NA	NA	NA	NA	NA	NA	NA	NA	NA	NA	NA	NA	NA	NA	NA	NA	NA	NA	NA	NA	NA	NA	NA	NA	NA	NA	NA	NA	NA	NA	1	NA	NA	NA	NA	NA	NA	ATGGAACGTGTTGCGGGAATTGCATTTTCGATTCCACTCGACTTTTATGGATCGCCCCTGTTTACACCAAGAATAAGAATAAAAGAGACAAATCCTGGTGGAATGATAAAGCGAAATCTAAAAAAAGAAGATAGGAAGATGAAGCGTGTGAAAGAACAAAGTCTTTGA
450	ADOR3B81730	NA	NA	NA	NA	NA	NA	NA	NA	NA	NA	NA	NA	NA	NA	NA	NA	NA	NA	NA	NA	NA	NA	NA	NA	NA	NA	NA	NA	NA	NA	NA	NA	NA	NA	NA	NA	NA	NA	NA	1	NA	NA	NA	NA	NA	NA	ATGGGATTCCCCGACGATGGACACGAGGCTCTTGATTCTGTTGGATTGAGCGGCGAACCTGGACTTTCTACTGAATCAGGAGTTCATGAACACGTGCATGCGATACCAGAGTCAATCTCTCAACCTTTCATGAGATATGTGTTGTCATGCGCCATATCTCCGGATTATGGAAAAAATGGAGATGTTTTCCGATTATATCTATACATCACCATGCGTGCCATCCGGTGGCTGGTGCTCAAGCATATACATGAGGATGCCCTGATAGCCGCAATCCTCGCCATATCCTGGCCGGAGAACAAAGAAAAGAAGATTGGAGAGTGA
451	ADOR3B81731	NA	NA	NA	NA	NA	NA	NA	NA	NA	NA	NA	NA	NA	NA	NA	NA	NA	NA	NA	NA	NA	NA	NA	NA	NA	NA	NA	NA	NA	NA	NA	NA	NA	NA	NA	NA	NA	NA	NA	1	NA	NA	NA	NA	NA	NA	ATGTGTGTCGCGGCTTTGCGTAGCTTTGCGTCGTTTATCTTTAAGGGTTACCATGATCGAGGTTGTAAAGAGAACCTTGCCCATAGAACCTGCGACAGAGCTCTAAACTACGAACGTCGAGCTAAAATCCGAAATCGGGAATCTCCGAAACGAGCTCAAGTCTCTCAAATCAAAAGGCTCGAGGGAGGTGGAAGACCAGGCGATGGAAATGATCTCGCTTCTTCCGCAGCAGGAACCACGGAGTCGTCACGCAACCGGCGCGACGATAGACGAATTTGGAGAACCGCATATCGCCCAGGGATCAGAATAACAGGAAGAGGCGAATCTGGCGTAATCATCTTCGCACTAAGACGCATCGATAGGCTAAGAGGAGAGAGTCATCGGCAAGAAGCAGAGGCA…
452	ADOR3B81732	NA	NA	NA	NA	NA	NA	NA	NA	NA	NA	NA	NA	NA	NA	NA	NA	NA	NA	NA	NA	NA	NA	NA	NA	NA	NA	NA	NA	NA	NA	NA	NA	NA	NA	NA	NA	NA	NA	NA	1	NA	NA	NA	NA	NA	NA	ATGGATGTCTCTATTTGCGGAATAGTAAAGAAGATGGAACGAATCCATAAGAAAAAAGTTAACATATATTCTCCGATGTGGAAGAAAACTATGATGCAACTGGATACTACTGGATCATTACGTTACACAGTTTCTGACGGAAGATTTCGCAGCCAAGTTCGAGCGACATATGCTTACGATGCAGAACGGGAGAGTACGTCTTACTAA
453	ADOR3B81734	NA	NA	NA	NA	NA	NA	NA	NA	NA	NA	NA	NA	NA	NA	NA	NA	NA	NA	NA	NA	NA	NA	NA	NA	NA	NA	NA	NA	NA	NA	NA	NA	NA	NA	NA	NA	NA	NA	NA	1	NA	NA	NA	NA	NA	NA	ATGTCTGGAACATGTGGTGTTAAGATCGGCTTAATCAGTAAGTATATGGAGAAATATCCAATGACACATGCTGACGAAATCCTCAAATATAGTCCTCACTCATTGTTCAATAGAGGTCTGCTAGTCATAAAAACAGGAAAGAGATCTCCTTTGGAGAATTTTTCCGAACAAATCTCTATTTATAAATAG
454	ADOR3B81748	NA	NA	NA	NA	NA	NA	NA	NA	NA	NA	NA	NA	NA	NA	NA	NA	NA	NA	NA	NA	NA	NA	NA	NA	NA	NA	NA	NA	NA	NA	NA	NA	NA	NA	NA	NA	NA	NA	NA	1	NA	NA	NA	NA	NA	NA	ATGTCAAAATATCATTGGGAAATAATGAATGATATAATTATAGTCTTAAAATCCTTGGATATAGCAATTACAACATTATGTTCAGAAAATGGAATAACAATTTCTTTGATATTTTTTATCATTCATATTATTAAAAATAATAATAATCATTTCAAAATTAATGACATAGGCAGATCTGAAACGGAACAATTTAAAA
455	ADOR3B81749	NA	NA	NA	NA	NA	NA	NA	NA	NA	NA	NA	NA	NA	NA	NA	NA	NA	NA	NA	NA	NA	NA	NA	NA	NA	NA	NA	NA	NA	NA	NA	NA	NA	NA	NA	NA	NA	NA	NA	1	NA	NA	NA	NA	NA	NA	ATGGCGGATTCCAGACAAAAATGGCTTCCTCATTCGCCATATTCTCTGACAGAAGCGCTTACGGACTATCACATCAATCTATTACTGAAAAATTGGCTCGCAAATAAAGTTTACGATGATTTGAATGATTTGGATGACTTGCTGGTCGGTGTCAAAGAATGA
456	ADOR3B81766	NA	NA	NA	NA	NA	NA	NA	NA	NA	NA	NA	NA	NA	NA	NA	NA	NA	NA	NA	NA	NA	NA	NA	NA	NA	NA	NA	NA	NA	NA	NA	NA	NA	NA	NA	NA	NA	NA	NA	1	NA	NA	NA	NA	NA	NA	CCGGAAAACGGAAAAGAGCTCCCTCGTACATCACTCTGCCTCCTTCTGCCTGAGCCGCCACCGCCACCACCGCCGCCGCCGCCATCGCCGCCGTCGACGACGACGACAACGACGACGACGACGATGTCGCCTCCTTTACCCTCGTCGCTTTTTCTTTTGATTAAG
457	ADOR3B81767	NA	NA	NA	NA	NA	NA	NA	NA	NA	NA	NA	NA	NA	NA	NA	NA	NA	NA	NA	NA	NA	NA	NA	NA	NA	NA	NA	NA	NA	NA	NA	NA	NA	NA	NA	NA	NA	NA	NA	1	NA	NA	NA	NA	NA	NA	ATGGCGGAGCGGATTGGAGAAAAGTATCACGAGGTTACAAGCGTAAGAAGGTACTCGTACGGCTTGGAAATTCCTTGGGCGCGAGCCACCCTGTTCGCCGATTGGAAAGCAAACAGAGATCGACCGAAAAGGGAAGCGCGAAGTTGGGCTGGCTAG
458	ADOR3B81772	NA	NA	NA	NA	NA	NA	NA	NA	NA	NA	NA	NA	NA	NA	NA	NA	NA	NA	NA	NA	NA	NA	NA	NA	NA	NA	NA	NA	NA	NA	NA	NA	NA	NA	NA	NA	NA	NA	NA	1	NA	NA	NA	NA	NA	NA	ATGACCGGCCAAAAAAATGGCATCAATCTTATCGATGAAGTGGATGTAAAGAAACAACATTGGGCAAGGCTTATACGATCTCCAATCTCGGCTCAAATTAACCGAGAAATCGACGAAATGGAAAAGTTGAGGCGATACTCGAACCGACGTGACTGGAAAGATATTGAGAAAAAATTATGGTTCGGTTCAAAATTGGAAAAATGGAAAGCGAGAAATTAA
459	ADOR3B81785	NA	NA	NA	NA	NA	NA	NA	NA	NA	NA	NA	NA	NA	NA	NA	NA	NA	NA	NA	NA	NA	NA	NA	NA	NA	NA	NA	NA	NA	NA	NA	NA	NA	NA	NA	NA	NA	NA	NA	1	NA	NA	NA	NA	NA	NA	ATGATTAACAATTCTCTTACACCTTTTTCTGTTTCTCCATTGCTCGTTGTAATTCGTGTAACGATGGGCAATAATCGAACAACACGAACAACATCTGTTCCTCGTCCATTTCGAGGTTTGACACTGTTTGCCCCTAGGAGAGTTACGATCGCGAAATCGGTGATTTGTGCTATTTACTTCGCCACCTGGGCAACAGCCGAAATTCATTATCCATTGCTACGTGGCGTGGCAAATTGTCGAATCGAGTGCAACGCCAGTTTCGACTCCTGGGATGTTTACATGCTTGCTCCCTTCGCTTTGTGCAATTATTATACGGATTGTACAATTGGGATAATGAAATATCTTGGAATATTTTTCTGA
460	ADOR3B81786	NA	NA	NA	NA	NA	NA	NA	NA	NA	NA	NA	NA	NA	NA	NA	NA	NA	NA	NA	NA	NA	NA	NA	NA	NA	NA	NA	NA	NA	NA	NA	NA	NA	NA	NA	NA	NA	NA	NA	3	NA	NA	NA	NA	NA	NA	ATGGAGAGGATAAAAGCGCTTTTACACAGATGCTCGAAACGCAAATCGAAAATAAAGCGCAACGAGATCTCGCGGACATCATCATCGATCAATGTCCAATCAACTCGATGCTCGCCTCGATACGCAAGAATACGAGCAGCACAGGAGGGCAGTGAGCATCCAGATCCTCAAAGGAGAGAAAAGGAAAGGAAAGGAGAGGAAAGGAGAGGAAAGGAAAAGAAAGAAGAAAAAAGGAAAGGAGAGGAAAGGAGAGGAAAGGAAAAGAAAGGAGAGAAGAGGAGAGGAAAGGAAAGGAAAGGAAAAGAAAGGAGAAGAGAGGAAAGGAAAGGAAAAGAGAAAAGCGGAAAGACGAGGAGAGAAGAGGAAAGGAAAGTAAAAGAGAAAAGAAGAAAGGAGAGG…
461	ADOR3B81789	NA	NA	NA	NA	NA	NA	NA	NA	NA	NA	NA	NA	NA	NA	NA	NA	NA	NA	NA	NA	NA	NA	NA	NA	NA	NA	NA	NA	NA	NA	NA	NA	NA	NA	NA	NA	NA	NA	NA	1	NA	NA	NA	NA	NA	NA	ATGGAATCGAATGGTATCATTGAATGGAATCGAATGGAATCAACCTCAAACGGAAAAAAACGGAATTATCGAATGGAATCGAACAGAATCATCGAATGCACCCGAATGGAATCACCTAATGTAATGGAATGGAATAATCCATGGACTCGAATGCAATCATCATCGGATGGAATCGAATGGAATCATCGAATGGACTCGACTGGAATAATCATTGACCGGAATCGAAAGGAATCATCATCGGATGGAAACGCATGGAATCATCATCGAATGGAAATGAAAGGAGTCATCATCTAA
462	ADOR3B81790	NA	NA	NA	NA	NA	NA	NA	NA	NA	NA	NA	NA	NA	NA	NA	NA	NA	NA	NA	NA	NA	NA	NA	NA	NA	NA	NA	NA	NA	NA	NA	NA	NA	NA	NA	NA	NA	NA	NA	1	NA	NA	NA	NA	NA	NA	ATGGAATCGAATGGTATCATTGAATGGAATCGAATGGAATCAACCTCAAACGGAAAAAAACGGAATTATCGAATGGAATCGAACAGAATCATCGAATGCACCCGAATGGAATCACCTAATGTAATGGAATGGAATAATCCATGGACTCGAATGCAATCATCATCGGATGGAATCGAATGGAATCATCGAATGGACTCGACTGGAATAATCATTGACCGGAATCGAAAGGAATCATCATCGGATGGAAACGCATGGAATCATCATCGAATGGAAATGAAAGGAATCATCATCGAATGGAATCGAATGGAATCAACATCAAATGGAATCAAATGGAATCATTGA
463	ADOR3B81797	NA	NA	NA	NA	NA	NA	NA	NA	NA	NA	NA	NA	NA	NA	NA	NA	NA	NA	NA	NA	NA	NA	NA	NA	NA	NA	NA	NA	NA	NA	NA	NA	NA	NA	NA	NA	NA	NA	NA	1	NA	NA	NA	NA	NA	NA	ATGATCAACCGTTATTTCCGAAAAACTAACTTTCATCGCAAAATTAATTCTTCGTTCTTCGTTGTTCGTCGCGCTTCTCCGAAATCGCTTGTTTGGATTCGATCATTTGGCGCGTGTATACGCTTCGCTCTGTTTACGACCTCGACAAGAAAAACTCTGTGTTTTCGTTCTCGAAAGTGCGCAAAAGTCAAGTATCCGTTGGGACGAGAAATACAAACTCTACAAACTGTTGAACGATACAATACCCCTCTCGTTCAACCCGTGCTCGTTCCATCGATCAAATCCAAGCATTCGTGTTACGAATTTCCATCGCGAGGAAACAAAAGGAGACGGAAATCAAGCAAGGAAGAGCATCATGTCCGAGGGCCGGTGCGAATCGCAGCACAACGTTCCAGACTC…
464	ADOR3B81803	NA	NA	NA	NA	NA	NA	NA	NA	NA	NA	NA	NA	NA	NA	NA	NA	NA	NA	NA	NA	NA	NA	NA	NA	NA	NA	NA	NA	NA	NA	NA	NA	NA	NA	NA	NA	NA	NA	NA	1	NA	NA	NA	NA	NA	NA	ATGTCACGATATTTAGATCATTATTCCTTCAGATCATTATTGGGCCTGAGGATTACTGGATCACTGGATCTCACGATATTTGAATCATTACCCCTCCTGATCATTATTAGGATATTAGATTTATTGGGCCTGAGGATTATTGGATCACTGGATCTCACGATATTTAGATCATTATTCCTCCTGATCATTATTAGGATATTAGATTTATTGGGCCTGAGGATTACTGGACCATTAGATCTCACAACAATTGGATCATTACTTCTTTAG
465	ADOR3B81832	NA	NA	NA	NA	NA	NA	NA	NA	NA	NA	NA	NA	NA	NA	NA	NA	NA	NA	NA	NA	NA	NA	NA	NA	NA	NA	NA	NA	NA	NA	NA	NA	NA	NA	NA	NA	NA	NA	NA	1	NA	NA	NA	NA	NA	NA	ATGAAACCCGCCTCCTCGAAGAATAATACTCGTCAAAGGTCTGACAAACGTGAAACAACGTTCGTGCAGACCTATCTTTTCGTTCAAGCGATTCTGATCTCTGAGTCGCGTGGAAAATATCGCTTCCCTCGATCCAACGAGATCGTGCAATTAAGAAAAGAAGAAGAAGAAGAAGAAGAAGAAGAAGAAGAAGAAGAAGAAGAAGAAGAAAAAAAAATATATATATATATATTCGAACGTATTCCCGCTAAAACTTTTACTCGCGAGTGA
466	ADOR3B81840	NA	NA	NA	NA	NA	NA	NA	NA	NA	NA	NA	NA	NA	NA	NA	NA	NA	NA	NA	NA	NA	NA	NA	NA	NA	NA	NA	NA	NA	NA	NA	NA	NA	NA	NA	NA	NA	NA	NA	2	NA	NA	NA	NA	NA	NA	ATGGAAATAGATGAAATTAATTGCGTGCACATCTTGATTTTATTCGGGAACGACAACGACGATAACGATCAGGTTAACAACGACAATGACAACGAGAATGATGAACATATGGATACAACGACGAATAATCATGCCAGCGATGATACGGATGATGAAGACGATGACGACGACGACGTCGACGACGACGACGTCGACGACGATGACGACGACGACGACGAAGAAGACGACGACGACGACGATGACGACGACGAAGTCGACGACGATGACGATAACGTACGCGACCACGAAGATCGTGCTCGTCTTGACTTATCCTGA
467	ADOR3B81843	NA	NA	NA	NA	NA	NA	NA	NA	NA	NA	NA	NA	NA	NA	NA	NA	NA	NA	NA	NA	NA	NA	NA	NA	NA	NA	NA	NA	NA	NA	NA	NA	NA	NA	NA	NA	NA	NA	NA	3	NA	NA	NA	NA	NA	NA	ATGGAGCGCGCCCAAGAAACCAGCCTCTTGCAGAAAAAAAAAGAAGAAAAAAGAATTGATAACAGGTTGAGTGCCACGATACGCAACGTGGTTTCTTGGCTCGCGTTATCTGTGAACCTCGATCTCGAGGAAGAAGAAGAAAAAGAAGAAGAAGAAGAAGTAGAAGAAGTAGAAGAAGAAGAAGAAGTAGAAGAAGAAGAAGAAGTAGAAGAAGAAGAAGAAGCTCGCGTTACGAGTTTCACGGTAGCCGCCGGGAAGAATCGCGTTGACCCATTTGAAGCAAGATGGATAGATGCTACCTTGGAGACCTATTACCGCGCGATGAAACGCGGGTAA
468	ADOR3B81845	NA	NA	NA	NA	NA	NA	NA	NA	NA	NA	NA	NA	NA	NA	NA	NA	NA	NA	NA	NA	NA	NA	NA	NA	NA	NA	NA	NA	NA	NA	NA	NA	NA	NA	NA	NA	NA	NA	NA	2	NA	NA	NA	NA	NA	NA	ATGGTAATTTGGGGAGATGGTTTGGAGTTGCGAGCGACTCGTAGTAGGAATCGTAGTGTGCTCCGAGAATGTGGAAAAAATGAGATTATTTTTGGATTAGGTGTGGATGAATCGTATCGTGGGAATGTTTGCATAATCCGAAGAGGTGTGGAATTTGCAAACGTGCAGGATGTTTTTATTGATAATTTCGATTATCTCTGTGTATTACTGAAGGCGAATTCGGAAACGGTACCTGGTACAAAGTGTCTTCATTGTTCTCCCATGTTTCGCCTTTTTTCGCTTCCTCTTTGCCTCGGTTTCGTTCGAGCATTACGGTATACATCGGTTCTGGCAGTTTTACGCCAGACATATACGCCCAACGCTGATAATACGAAATATATCGCGGAGCGATACACGGTT…
469	ADOR3B81848	NA	NA	NA	NA	NA	NA	NA	NA	NA	NA	NA	NA	NA	NA	NA	NA	NA	NA	NA	NA	NA	NA	NA	NA	NA	NA	NA	NA	NA	NA	NA	NA	NA	NA	NA	NA	NA	NA	NA	5	NA	NA	NA	NA	NA	NA	ATGACGAAAAACTTTAATAGTAATAATAATAATAATAATAATTGTAGTGATGATGATGATGATGATGATAATGGTGATAATAATAGTAGTAGTAGTATAGTAATAGTAGTAGTAGTAGTAGTAGTAGTAGTAGTAGTAGTAGTAGTATATAATAATAGTAGTAATAATAGAGGAAGTGGGAATGGTGATGATAGTAGTAGTAGTAACAATAACAAAGGAAGTGATAATGGTGCTGGTAGTAATAGTAGTATTGGTAATAATGATAATGATAATAATAATAATAGTACTAAGAATAAGAATAATAATAATAAAAATAAAAATATAACTAAAAAAAATAATAATGGTAATGGTAATGGAAATAGTAATAATAGTAGTACTAGTAGTGATACTAGTAGTGAT…
470	ADOR3B81851	NA	NA	NA	NA	NA	NA	NA	NA	NA	NA	NA	NA	NA	NA	NA	NA	NA	NA	NA	NA	NA	NA	NA	NA	NA	NA	NA	NA	NA	NA	NA	NA	NA	NA	NA	NA	NA	NA	NA	3	NA	NA	NA	NA	NA	NA	ATGAGAGAAAATCATTGTGAAAAGAGAAGAGAATATCTCTCATCATTTCGAGGACCATTAATGAAAAATTCATTAATTATTCGTTTTCTATTGAAAAATTCACCATTTTTTAACTCGCAATTGGAAGCTAAACCTTTAGGTAAAATTTCACAACTTTCAAGTTTGTATCTGGAAGCTAGAACTTTAGGAGAATATAAGTTTACAGGAGGTCGCTTGACAAATTTCCGAGAATTTTGCCAGTTCCAAGAAATGATATCAAATTCCTGGAATTTTCAAAATTTTTCGAAGGAAAGAAATTTTTGCCCAAATTTCGACTTTGTATTAGGAGAACATAAGTTTATAGGAGGTCGCTTGAAGAAATTCCGAGCATTTTGCCACTTCCTAGAAATGACGTCAAAT…
471	ADOR3B81857	NA	NA	NA	NA	NA	NA	NA	NA	NA	NA	NA	NA	NA	NA	NA	NA	NA	NA	NA	NA	NA	NA	NA	NA	NA	NA	NA	NA	NA	NA	NA	NA	NA	NA	NA	NA	NA	NA	NA	1	NA	NA	NA	NA	NA	NA	ATGGTCAGAGCACGATATGTTCATAAACTATCTAATTGTCGTAGAAGATTTAGAGAATTATTAGCTACAAAATTCTTAGGATTATCCGAAAATACAAGAAAACCTTGTCAAAAGGAGTCAAAAGGAGTCTCCTCTTCAATGGAGTCAACATAA
472	ADOR3B81859	NA	NA	NA	NA	NA	NA	NA	NA	NA	NA	NA	NA	NA	NA	NA	NA	NA	NA	NA	NA	NA	NA	NA	NA	NA	NA	NA	NA	NA	NA	NA	NA	NA	NA	NA	NA	NA	NA	NA	1	NA	NA	NA	NA	NA	NA	AATTGTACAAGAGTTGAATATCAATATTGTGACGGGCCGAAAATTCTCAAAATTGATTGCCCCCACAACGAACTCGCAAAAATGCGCAGCGGGGCAGATGCGATGCCGATTGCCCAGAAAATTAGCATTATCCCCATAACAACCACGTCGACGATCCGAAAAACCGATCCCGAAAACGAAAGAGAAAAAAATAAACGTAAG
473	ADOR3B81861	NA	NA	NA	NA	NA	NA	NA	NA	NA	NA	NA	NA	NA	NA	NA	NA	NA	NA	NA	NA	NA	NA	NA	NA	NA	NA	NA	NA	NA	NA	NA	NA	NA	NA	NA	NA	NA	NA	NA	1	NA	NA	NA	NA	NA	NA	ATGGCGTTGTGGAATGGCTCTGAAACGCTGAGCAACACTTTGGAAAATATTGTGGGACTGGCTTGGAAGAAAGCTCTAAAATCTAAAACTCGTGAAAGCTTTAAAATGCTTTATTCGAAAGAAAGAGAAGTATTCAGAAAGAGATCCGAATACTATGGCAAAATTCTTTAA
474	ADOR3B81864	NA	NA	NA	NA	NA	NA	NA	NA	NA	NA	NA	NA	NA	NA	NA	NA	NA	NA	NA	NA	NA	NA	NA	NA	NA	NA	NA	NA	NA	NA	NA	NA	NA	NA	NA	NA	NA	NA	NA	1	NA	NA	NA	NA	NA	NA	ATGTATCGAATTCGGCGCACGTATTCGGCTAATCTTTTCCGAGCGAAAATTTTGCATTCGACGTTTCATCCGAGGTTTCTCATGAGGCGGCGTTTTAGGAAAGGAGGCGATACACGCGATGGGTACAAAATTAGAACGTGGTTCGGGCCAAGAAAAACTAATTACGAGAAAGTTGTGTGTTGCGACGAGAAAAATCCTCATCATCTTCTGTTAAGGGAATTAAACAGAGAAGCGTTGGAAAGTAATGGAACACCGACCCATTCTCGAGGTTGGTGCGACGAAAATTGCATTCGATCCGACTAA
475	ADOR3B81865	NA	NA	NA	NA	NA	NA	NA	NA	NA	NA	NA	NA	NA	NA	NA	NA	NA	NA	NA	NA	NA	NA	NA	NA	NA	NA	NA	NA	NA	NA	NA	NA	NA	NA	NA	NA	NA	NA	NA	1	NA	NA	NA	NA	NA	NA	ATGCACGAACGCGTTGCTTTTCTTCTTCTTCTTCTTCTTCTTCTTCTTCTTCTTCTTATAGCTCCACAACGAGCACGATACATCGAGACTTTCGAATCGATCTCGATCGGCTGCTGTTCACTGGCCAACACGAGCTCCAATCAGACCGAGCCCCTTAAACCGTGGAAAAAAGGACAAAGAGCTCATCTTCGTCGAGCAATATTCGCAACAACGTGTATCCGTTTCGTGGAAGAGGAAATTTGCGTGGTTTGCAAAAAGAGAAAAGAAAAATCGGTAGGCATCAATAGAGTAGTAGTAGAGTGGATCGACGAGTGGGTAAGGCCGACGCGAGGAAGACGTAAAGAAAACGCAAAGCGCGGTCCTCTCTTCGTCGGCTTATTCCACTTGAGCCGCGGCGAA…
476	ADOR3B81873	NA	NA	NA	NA	NA	NA	NA	NA	NA	NA	NA	NA	NA	NA	NA	NA	NA	NA	NA	NA	NA	NA	NA	NA	NA	NA	NA	NA	NA	NA	NA	NA	NA	NA	NA	NA	NA	NA	NA	1	NA	NA	NA	NA	NA	NA	ATGGAGGAAGAGAGGAAGAAGGATGAACGAGCGAAGGAGGAGAGTCGAAAAAAAGAGAAGAAGAATAGAAGGAAAATAAGAGAAAAAGAAAAACAAGAAGAGGAAGAAGAAGAAGAAGAAGAAGAAAGAAAGCGGAACGCCGCGCGCCTCGATAGTGGTTAA
477	ADOR3B81878	NA	NA	NA	NA	NA	NA	NA	NA	NA	NA	NA	NA	NA	NA	NA	NA	NA	NA	NA	NA	NA	NA	NA	NA	NA	NA	NA	NA	NA	NA	NA	NA	NA	NA	NA	NA	NA	NA	NA	1	NA	NA	NA	NA	NA	NA	ATGGTGGTGGCTACACCGCTGGCTTCTCGCGTCTCTCCAAGACTCGCAACTCCGAGAGTGTGTGCCCCCCCGCCCGAGGGTCAAGGAACTCCCTCGGGAACAGGTTCACCTCCTCCTCCTCCTCCCTCTACCGTGGCGGTGGTACCTACTACTACTACTACTACTACTCCTCTCCCCCTCTCGTCCCTTCTTCTCCTCGTGGCATGGTCTTCTTCTTCTTCCCTCCTCCCACCTTCTGCCGCCCTATGCCCCCTCCGGTCCGTACCTTAG
478	ADOR3B81911	NA	NA	NA	NA	NA	NA	NA	NA	NA	NA	NA	NA	NA	NA	NA	NA	NA	NA	NA	NA	NA	NA	NA	NA	NA	NA	NA	NA	NA	NA	NA	NA	NA	NA	NA	NA	NA	NA	NA	1	NA	NA	NA	NA	NA	NA	ATGGAGGAGGAAGAGAGCCGTATTGCGGTTCAACTTGCGTTGGATGAAAGAAGACAAATGTTCGTAAATATTGGCAGCGAGATGTTTGGAATTTTTGCTTGTCCGATTATAACACGGTCTCTTCACCATGATGGAAATAAAATATTTACGGCAGAAATGTTTAAAAGTGATGGATTCGAGTCGTGA
479	ADOR3B81913	NA	NA	NA	NA	NA	NA	NA	NA	NA	NA	NA	NA	NA	NA	NA	NA	NA	NA	NA	NA	NA	NA	NA	NA	NA	NA	NA	NA	NA	NA	NA	NA	NA	NA	NA	NA	NA	NA	NA	1	NA	NA	NA	NA	NA	NA	ATGGCCGATCAGAAGCGTGTTCCTGAAAGTGCCATTTGTATTCGGGAATCAATACTCTTGGTGCCGGTTTTTGCCTTTCCCCAAGCCCAAGGAAGTCTCATAATATATAATGTAACAGTTATGGTTCGAGGAAACGTTAAATCGTTCCGCGAGGAAGATCGATACGGCGGAGTCAGTGAATTCAAGCCGTTCCTCCTGGGCAATGTAATGATTCCTTGA
480	ADOR3B81924	NA	NA	NA	NA	NA	NA	NA	NA	NA	NA	NA	NA	NA	NA	NA	NA	NA	NA	NA	NA	NA	NA	NA	NA	NA	NA	NA	NA	NA	NA	NA	NA	NA	NA	NA	NA	NA	NA	NA	2	NA	NA	NA	NA	NA	NA	ATGGGTGCACAAGAACGTTGTATTAATATAACAACAACAACATCAACAACATTAACAACAACAACAATCATAACAACAATAACAACAACAACAATAACAACAACAACAATAATAACAACAACAATAATAACACCAATAATAATAATAACAACAATAATAACAACAACAATAATAATAACAACATTAACAACAACAATAACAACAACAACATCATCATCAATAATAACAACAACAACAACAATAACAACAACAACAATAACAACAACAACAATAATAACAACAACAATAACAACAACAACAACAATAACAACAACAACAATAATAACAACAACAACAATAATAACACCAACAATAATAATAACAACATCAACAACAACAATAACAACAACAATAATAATA…
481	ADOR3B81927	NA	NA	NA	NA	NA	NA	NA	NA	NA	NA	NA	NA	NA	NA	NA	NA	NA	NA	NA	NA	NA	NA	NA	NA	NA	NA	NA	NA	NA	NA	NA	NA	NA	NA	NA	NA	NA	NA	NA	3	NA	NA	NA	NA	NA	NA	ATGCGTCTGCTGAAAGTCGTTTCCCTTTCGATTAACGTTTCGCCTTCTCGATCGTTTGATGAACATGGATCAAACGAGTCATCCATCCTACGATATACTTTCACGATCAGAGTAATTACAGTGATCTCGTTGCAAAGCAATGATAGCAATGATAATAATGATAATAATAATGATAAAAATGATAATAATGATAATAATGATAATGATGATGATGATGATGATGATGATGATGATGATGATGATGATGGTGGTGGTGGTGGTAGTGGGGATGGTGATGATGATGATGAGGCTGCTGATGATGATGATGATGATGATGATGATGATGATGATGATGATGATGGTGGTGGTGGTGTGATGGTGATGGTGATGGTAATGGTGATGGTGATGGTGATGGTGATG…
482	ADOR3B81930	NA	NA	NA	NA	NA	NA	NA	NA	NA	NA	NA	NA	NA	NA	NA	NA	NA	NA	NA	NA	NA	NA	NA	NA	NA	NA	NA	NA	NA	NA	NA	NA	NA	NA	NA	NA	NA	NA	NA	1	NA	NA	NA	NA	NA	NA	TTGGAGAAAGCGGGACGGGAAACTTTTGCTTGGGAAGGAAGATTTTTTTTATCCTCTTCGATCTTTCCGTACATTCGATCGATTTCTATCTATCGGGGAAATCGATGGCGGAGAGAAGAAGAAGAAGAAGAGGAAGAGGAAGAAGGAAAAGAAAATGGCGAGAAGACCAGGGACGAATTGTCTGGCATGCAAG
483	ADOR3B81932	NA	NA	NA	NA	NA	NA	NA	NA	NA	NA	NA	NA	NA	NA	NA	NA	NA	NA	NA	NA	NA	NA	NA	NA	NA	NA	NA	NA	NA	NA	NA	NA	NA	NA	NA	NA	NA	NA	NA	1	NA	NA	NA	NA	NA	NA	ATGGCCCGATCCGCGCAGCATCCGGCTTGGATGGAAGAAACCGGAAGACGGATGGGATGGGAAGAAGGATTCTCCTGGGAACACTCGAAGGCTATCTGTCAATCGTGTGGCAGCGGAGTTCGATTCAAAGCGATATTCGGATTAATGGCTCGGATAGACGGTACAATGGCCCCGTTACAATGA
484	ADOR3B81943	NA	NA	NA	NA	NA	NA	NA	NA	NA	NA	NA	NA	NA	NA	NA	NA	NA	NA	NA	NA	NA	NA	NA	NA	NA	NA	NA	NA	NA	NA	NA	NA	NA	NA	NA	NA	NA	NA	NA	1	NA	NA	NA	NA	NA	NA	ATGGCGGCGAGAGAACGATCCCCAAATACCGGCATAAAGCCGATTACCACGATTCCACAAATTACACCGCTTTGTCCGTGTATACCGGTCAGCAGTATCGCCGGCGTTGATACGCAATTATGCTCGGTGCTTCGAGCAACACCGCCCATCCAAACCAATTCTGCCCGCGATTGTTTCTCTGAATAA
485	ADOR3B81946	NA	NA	NA	NA	NA	NA	NA	NA	NA	NA	NA	NA	NA	NA	NA	NA	NA	NA	NA	NA	NA	NA	NA	NA	NA	NA	NA	NA	NA	NA	NA	NA	NA	NA	NA	NA	NA	NA	NA	1	NA	NA	NA	NA	NA	NA	ATGTTAGCAGGTACCATCCGCCTTCCGTCTCTGCAGAAGCACGACAAGAATTCTGCTAGTTCCAAGAAAGCTGACACTTCGTCACGGCTTCGTCTTCAAGATGGAACTGTGCCACGAGCGAGCGAGACGAAAACCAAGAAAGTGAAGAAGACCTGTATTAGGAGAGCAACAAGGATAGTTATAGTATCGATTACGGCTGATCCTGACTGCAGAATATCACATGCTCAAGCCCTTATTCTCGCTAAGTCCAAGATAGACTTGGCGGATATTACAGTGATAAAGATCGAAATATTCCATGACAGTCATTATCCTCGAGATCTTTGA
486	ADOR3B81963	NA	NA	NA	NA	NA	NA	NA	NA	NA	NA	NA	NA	NA	NA	NA	NA	NA	NA	NA	NA	NA	NA	NA	NA	NA	NA	NA	NA	NA	NA	NA	NA	NA	NA	NA	NA	NA	NA	NA	1	NA	NA	NA	NA	NA	NA	ATGGTCGGCCTTCTAAGCGAAAATGTGAAATATCCTGAAATACGAAGAAAACTCCAAAAAGAGAGTTCAATCAAAACAACACGATCACTGACCAGTTTACAAAATCCTTCGAAACGCATAGAAAGAAGTCCAAAAAAGGGTTCGTCGACCTTCAACGAGTTAGAGATTCTCTTCGTAGCAGGTTAA
487	ADOR3B81964	NA	NA	NA	NA	NA	NA	NA	NA	NA	NA	NA	NA	NA	NA	NA	NA	NA	NA	NA	NA	NA	NA	NA	NA	NA	NA	NA	NA	NA	NA	NA	NA	NA	NA	NA	NA	NA	NA	NA	2	NA	NA	NA	NA	NA	NA	ATGACAACGAAAGATGAGGATGACTATGATGATAACGACGATGATAATGATAATGACGATGATGATGAGGAGAAGAAGGAAGAGGAGAAAGAAGAAGAAGAAGAAGAACAGAAGAAGAAGAAGAAGATGATGATGATGAAGAAGAATAAGATGAGATTTTCTGTTGGAGGAACATGGTTCAATTATCAGACAATTATCAGACAATTATCAGACGAATATCACATCCTATCACATCCTGAAACGGATTACTAA
488	ADOR3B81985	NA	NA	NA	NA	NA	NA	NA	NA	NA	NA	NA	NA	NA	NA	NA	NA	NA	NA	NA	NA	NA	NA	NA	NA	NA	NA	NA	NA	NA	NA	NA	NA	NA	NA	NA	NA	NA	NA	NA	1	NA	NA	NA	NA	NA	NA	ATGCAACGACGAATCGAAATCGGTTCGACAACTAATTCCCATATTCGACGGGGAAACAAGAGCGATTGCCACGATCTTATCGTCTTAGCCCATGCACCCTCTACGCGTGTCCCGCCTAATGGAACATCTCTGGCGCTCGAGCAAGCCTGCACTGTATCGTATCCTCGAAATATTCCGTCTCGACACCCTCGATCGGTGCTCTCAGAATCGCGACGAGACACTACGCTAGGATTCATAGTATACCGTTTCGTCTCAACTCACGAGGAGAAACCTGTCTATCAGACAACGCTACGAGGAAAGTTGAACTATTTGAAAGGTGGCGGTGGTGGGTGA
489	ADOR3B81993	NA	NA	NA	NA	NA	NA	NA	NA	NA	NA	NA	NA	NA	NA	NA	NA	NA	NA	NA	NA	NA	NA	NA	NA	NA	NA	NA	NA	NA	NA	NA	NA	NA	NA	NA	NA	NA	NA	NA	1	NA	NA	NA	NA	NA	NA	ATGGCAATAGTCGTAAGACAGAGTTGCGATAATTTAAGAAATAAATACAGACTATTCCTAGATCTTTACAAAGTTCTTACGACCTCTATAACTTTGCAAAAAGATGAGATAATCTATAAGTTTGATCCATTTTTGGAAAATGGCAATAGTCGTAAGACAGAGTTGCGATAA
490	ADOR3B81994	NA	NA	NA	NA	NA	NA	NA	NA	NA	NA	NA	NA	NA	NA	NA	NA	NA	NA	NA	NA	NA	NA	NA	NA	NA	NA	NA	NA	NA	NA	NA	NA	NA	NA	NA	NA	NA	NA	NA	1	NA	NA	NA	NA	NA	NA	ATGGATGGTGGCGGTAGTAGTAATGATGGTGATGATGATGATGATGATATTAATATTAATAATAATAATAATAATAATAATAACAACAACAATAATAATAATAATAACAATAACAATAATAATAACAATATTAATATTAATAATAATAATAATAATAATAATAACAACAACAATAATAATAATAATAACAATAACAATAATAATAACAATATTAATATTAATAATAATAATAATAATAATAATAATAATAATAATAATAATAATAAAAATAAAAATAATAATAATAATAGTAGTAGTAGTAGTAGTAGTAATAGTAGTAGTAGTAGTAGTAGTAGTAGTAGTAGTAGTAGTAGTAGTAGTAGTAGTAGTAGTAGTAGTAGTAGTAGTAGTAGTAGTAGC…
491	ADOR3B81997	NA	NA	NA	NA	NA	NA	NA	NA	NA	NA	NA	NA	NA	NA	NA	NA	NA	NA	NA	NA	NA	NA	NA	NA	NA	NA	NA	NA	NA	NA	NA	NA	NA	NA	NA	NA	NA	NA	NA	1	NA	NA	NA	NA	NA	NA	ATGCGGAGGTGGGAAGAAGAAGAAGAAGAAGAAGAAGAAGAAGAAGAAGAAGAAGAAGAAGAAGAAGAAGAAGAAGAAGAAGGAGGAGGAGGAGGAGGAGGAGGAAGAGGAGGAGGAGACCGATCGGAGGGCATGACGGAAAAAGATAAGAAGATGGATCCGAGATCAGGAGAGAAAAAGAGAGAGAAAGAGAGAAAAGTGAGAAAAATGATGGCGAAGGAGATAAAAAAATGTTTAAAAAAGAGTAATAAGGAATCATAA
492	ADOR3B81999	NA	NA	NA	NA	NA	NA	NA	NA	NA	NA	NA	NA	NA	NA	NA	NA	NA	NA	NA	NA	NA	NA	NA	NA	NA	NA	NA	NA	NA	NA	NA	NA	NA	NA	NA	NA	NA	NA	NA	2	NA	NA	NA	NA	NA	NA	ATGGTTTCGAGATATGGCGTCTCAAAGGAGGGCGCAGTGGGTGTAGCCGTGGGTGTAGGACCTATGCACTGTCTTTTACCACATTGTGGAGGGCCCCACCACCATCATCACCTTTCGGCCCCTCATCCACAAAATCCTCAGCCAGGTCATAATCACCACGTGCATCCGGTCCATCAACCACCACCCTCGCCGAGTCCCCACTTGAATCATCAGCTGAGCCATCATCAATTGACTGTTAACATTAACCATCTGAGTCATCAGCAGCAACAACAGCAACAAACCCAGCATCAACAAGCACCGCCACAGTATCGAGTTGTTACTGCAAATGCTAGTAAAATAAATATTTATGATTTTTTATGA
493	ADOR3B82029	NA	NA	NA	NA	NA	NA	NA	NA	NA	NA	NA	NA	NA	NA	NA	NA	NA	NA	NA	NA	NA	NA	NA	NA	NA	NA	NA	NA	NA	NA	NA	NA	NA	NA	NA	NA	NA	NA	NA	1	NA	NA	NA	NA	NA	NA	ATGGGTGAGGAGCGCGATAGAACAAGAGGGATACCACCATGGGGAGGAGGAGGAGGAGGAGGAAGGGGGGAAAGGTTGCGCGAAACCGTTTCTCTACTACGACCAGCACCGTTGGCGATGGTTGTGGTAGTAGTACGAGCTCCGCTGGTAGCAGATGAACAGATACGGGTTATGGGAGGTAGAAATATAGATTTAGGCTAG
494	ADOR3B82032	NA	NA	NA	NA	NA	NA	NA	NA	NA	NA	NA	NA	NA	NA	NA	NA	NA	NA	NA	NA	NA	NA	NA	NA	NA	NA	NA	NA	NA	NA	NA	NA	NA	NA	NA	NA	NA	NA	NA	2	NA	NA	NA	NA	NA	NA	ATGATTAATCCCGATGTTCTAAAATATGTAATGTTAGAAATCACGAAGCATAAATGTTCTGGTGAAGCTAGCAATCTCATAAATTGCCTCACAAACAATATCGTTACTCTATTAAAAGCAGATACAGAAAAATTTCAATACGCAAAAATGTAA
495	ADOR3B82033	NA	NA	NA	NA	NA	NA	NA	NA	NA	NA	NA	NA	NA	NA	NA	NA	NA	NA	NA	NA	NA	NA	NA	NA	NA	NA	NA	NA	NA	NA	NA	NA	NA	NA	NA	NA	NA	NA	NA	1	NA	NA	NA	NA	NA	NA	ATGTTTCTCCCACAGAGATCCTCCTCGGATAAAGGTTTCAAAAGGTTTCACAAAGAAGCAGGCGAAGCCGCGATAATCTCAATTTTCCGGGAGATCGGTCGTTCGTTCGAGGGTATTCAAGCCGCACACGATCGAAATCAAAAGCCAAAGTCGCTTTCTCGGGACGATCCTTTAACGAAGACCGGAATACGTGCCAACTGGCCCTTGGCCGACTTTCGACTCGACGGTTATGATCGTGACCAACGTGGGGAGCAAAAGGTTCGAGATAAAGGACGAAAGGTGTTAACAATGGCCCAAGTAACCCGAGTTGTGGTTCGTTTAAAATTTCGTGGAACTCGAAAACGTTTATAG
496	ADOR3B82048	NA	NA	NA	NA	NA	NA	NA	NA	NA	NA	NA	NA	NA	NA	NA	NA	NA	NA	NA	NA	NA	NA	NA	NA	NA	NA	NA	NA	NA	NA	NA	NA	NA	NA	NA	NA	NA	NA	NA	1	NA	NA	NA	NA	NA	NA	ATGAAAACGAATATTTCGAGGATTCCTTCTCCAACTACGCGGACTATAGAACATACCGATCGAATCTCGTCGACCGACGAGTCCGCAGCGATTCGTGAAATCGATCGAAACCGAAACGCTATCGAAACGACTGAAACACCGAAAGAATTCCTCGAGAGATGCATTTCAAAGATTCCCCAAGATTCGAGTTTGCAGGCTATTCGGTATAGG
497	ADOR3B82053	NA	NA	NA	NA	NA	NA	NA	NA	NA	NA	NA	NA	NA	NA	NA	NA	NA	NA	NA	NA	NA	NA	NA	NA	NA	NA	NA	NA	NA	NA	NA	NA	NA	NA	NA	NA	NA	NA	NA	1	NA	NA	NA	NA	NA	NA	ATGGATGGTCCCGGCGATGGAAGTTGCGCGGCAACGGATGTTTTCACGCCGGAAGTTACATTATTTTATTCATGGCTGGCCGCGGTGGGAAAGCGGGTGAGATCAATTTCCATATGCAAAACGGGACGTCGAGCCGCGGTTTCCGGCCGCGCGTCGATACCATGGACAGGAGAGTTGGCAGGCTTGGAAATCTTGGTGGCAAGTTTGAGAGTAGTTGCGCTGCTTGTTGGTTGCAATTATCATTTAAATCGCGGTATGGACTCGGTATGA
498	ADOR3B82063	NA	NA	NA	NA	NA	NA	NA	NA	NA	NA	NA	NA	NA	NA	NA	NA	NA	NA	NA	NA	NA	NA	NA	NA	NA	NA	NA	NA	NA	NA	NA	NA	NA	NA	NA	NA	NA	NA	NA	1	NA	NA	NA	NA	NA	NA	ATGCCACAAGGAATCAATCCTTGGGCGCATAGTTTAGCGCGAGATTACACGTTCCGCGCCAGCTTCGAGGAGAGGAGGAGGAGGAAGAAGAAGAAGAAGAGGAGGAGGAGGAAGAAGGAGAAGAAGAGGAAGAAGGTGGATAGGGCTGTGTGGGTATACGAGCCGCCATCTTGTCAGGCGTTCCTGCGCAGAAACACCCCAGGGCTGTTCGTTTCGACGAACGCACGACCACCGTAA
499	ADOR3B82065	NA	NA	NA	NA	NA	NA	NA	NA	NA	NA	NA	NA	NA	NA	NA	NA	NA	NA	NA	NA	NA	NA	NA	NA	NA	NA	NA	NA	NA	NA	NA	NA	NA	NA	NA	NA	NA	NA	NA	1	NA	NA	NA	NA	NA	NA	ATGATAACCGCCGTGACTCACCTCGAAGCCCAAGGGAGGGATTCGAATGGGGTTGGAGAGAGCGAGAGAGAGAAAGAGAAAGAAGCGGCTATATTCTCATCCACGCGAAATTTCGCAGGCTCCACCACCACGACTACCACCNTTCTTCTTCTTCTTCTTCTTCTTCTCCTTCTTCTTCTTCTTCTTCGTTTCCTCTTGGTTGGAGCGTCGGTGCCAGGAGGAGGACGGAGGAGGACGGTGCCGCTTGGTCGCCTTCGCAGAGATCTCTGGGCAAGGATCCGGACACCGCTGCGCATTCGCACCTGCGTCTTCGCCCCAACGCGAACGCATGTGTCGATATGCCGGATGCACGTGCTGCTGCACCGATCCCGATCAGGAGTGAGTACGCCAACCACGTAT…
500	ADOR3B82068	NA	NA	NA	NA	NA	NA	NA	NA	NA	NA	NA	NA	NA	NA	NA	NA	NA	NA	NA	NA	NA	NA	NA	NA	NA	NA	NA	NA	NA	NA	NA	NA	NA	NA	NA	NA	NA	NA	NA	1	NA	NA	NA	NA	NA	NA	ATGTTCCAATATCGTGCAGGTATTATTTCAGAAGAACGTGAGCCTGCAGTGCGATTTTCATTCCAAGAAATCGAGGAAAATCATTCGCTGCAGCAGATTCTTGTTGCTGTGAATTCTTTGCAATTTCTTCAACTTCATGGAATTTTGCAATTGCGATTTCAAG
501	ADOR3B82072	NA	NA	NA	NA	NA	NA	NA	NA	NA	NA	NA	NA	NA	NA	NA	NA	NA	NA	NA	NA	NA	NA	NA	NA	NA	NA	NA	NA	NA	NA	NA	NA	NA	NA	NA	NA	NA	NA	NA	3	NA	NA	NA	NA	NA	NA	ATGACCACGACAACACCACCAACGCCGCCAACGCCGCTCTCTACCACTACAACTACCTTTTCACAATCCCAATCGCCTTCACCACCGCCGCCGTCCTACTCTTTGCTGCCACCTATTCCACCGCCTTTGCCTTCTCAACCACCTCCAGGCTCCGCTCTTTTGCTAAGGGATAGGATAAAATATGATTCCCAAATTCTACAGTCAAAAATTCCAATTTCAAGAAAAATAAAGAATATTTAA
502	ADOR3B82082	NA	NA	NA	NA	NA	NA	NA	NA	NA	NA	NA	NA	NA	NA	NA	NA	NA	NA	NA	NA	NA	NA	NA	NA	NA	NA	NA	NA	NA	NA	NA	NA	NA	NA	NA	NA	NA	NA	NA	2	NA	NA	NA	NA	NA	NA	ATGAAATATGATGCGTTAAATCGAAGTCCAGTTGAAAAAGCTAGAGAAACCGAATTAATCGAATTATTTGTTTTGGGAATAAAGATTTCTATCGATTGGGTTGCAATTATGCAATGCGATAGCAAAGAAATTTTAAATATTCATGATAAGTTAGAACAAAGAACTACAAAAACATCAAAATTACAAAATACCAGAACTATAAAAACGGAAGAATTACAAACAACAGAATTACAAAAACAGAAAGAATTATCAGAAACAAAAACCTCAAAACTTTTTGAACTTTCGAACTTTAGTGACAGTGAAACATCATTGGCAAATGGATTTTATTTTTGA
503	ADOR3B82106	NA	NA	NA	NA	NA	NA	NA	NA	NA	NA	NA	NA	NA	NA	NA	NA	NA	NA	NA	NA	NA	NA	NA	NA	NA	NA	NA	NA	NA	NA	NA	NA	NA	NA	NA	NA	NA	NA	NA	1	NA	NA	NA	NA	NA	NA	ATGGCCGCCAAAGACGAAGACGAAGACGAAGACGAAGACGAAGACGAAGACGAAGAAGAAGAAGAAGAAGAAGAAGAAGAAGACGAGCACGACGACGACGACGACGACGACACGGTGGAAACAGCAGCCACGGAGGGGGGAACGGGGTTGGGTACGACGAACCAGATTGTGTGCACGAGGTACACGTCACCCGTACTAACGACTTCCCGATCCACGTCCGACAGAGAGAAAAGAGTCGGGGAGGGGGAGGTAGGGGAGGAGGTGGAGGAAAGGAGAGGGTTCGAGTGA
504	ADOR3B82110	NA	NA	NA	NA	NA	NA	NA	NA	NA	NA	NA	NA	NA	NA	NA	NA	NA	NA	NA	NA	NA	NA	NA	NA	NA	NA	NA	NA	NA	NA	NA	NA	NA	NA	NA	NA	NA	NA	NA	1	NA	NA	NA	NA	NA	NA	ATGGTATTTTTTTACATTCCGAAGGAAGAAGAAGAAAAAGAGAAAGAAAAAGAAGAGGAAGAAGAAAAAGAAGAAAAAAAAGAAAGAAAGAAAAGAAGAAAAAGAAGAGGAAGAAAGAAGAGGGAAAAAAAGAAAAGGAAAAAGAAAAAAGAAGATAAAGAAGAGGAAGAAAGAAGAGAAAAAAAGAAAGAAAGAAAAGAAGAAAAAGAAGAAGAAGAGGGAAACAAAAGAACAGGAAAAAGAAAAAAGAAGATAAAGAAGAGGAAGAAGAAGAAAGAAGAGGAAGAACAAAAAGAAAGGAAGAAAGACATGTTTAAAAGAAAGTTTCGCGAGCAATGA
505	ADOR3B82111	NA	NA	NA	NA	NA	NA	NA	NA	NA	NA	NA	NA	NA	NA	NA	NA	NA	NA	NA	NA	NA	NA	NA	NA	NA	NA	NA	NA	NA	NA	NA	NA	NA	NA	NA	NA	NA	NA	NA	2	NA	NA	NA	NA	NA	NA	ATGAAGGTATTGAATGGAACTCTACGGCGAAAGGAAGAGCAACGATGGCGGGTATGCCGTATAAACTCACCCACCTCTTTGCGAGAAACGTCGGAGGATTATCAAAGTCGATTTCACGGGAGGGGTTATCCCCTATGCGCGACAAAGGAAAGAGTTGGCCGTGGGCGATCTTCTTCATCGAGGCCCGTGGATCGTCATCCTGGATTTTGGTCTAGGTTGGAGG
506	ADOR3B82120	NA	NA	NA	NA	NA	NA	NA	NA	NA	NA	NA	NA	NA	NA	NA	NA	NA	NA	NA	NA	NA	NA	NA	NA	NA	NA	NA	NA	NA	NA	NA	NA	NA	NA	NA	NA	NA	Y	NA	1	NA	NA	NA	NA	NA	NA	ATGCTCGGCGTTCTCGAAAACGCTCGGGACGAAAGCGGAGCAGAGGAGGAGGAGGAGGAGGAGGAGGTGGAGGAGAAGAAGACGAGAAACGACGAGGGTGAGGCCGGAAGGCGAGGAACGCGAAACACTGGAGTGGAGTATGAAGCGAGGAGAGAAGGACAGAGACCAAAGAGGCCGAAAAAAGACGGGGAGGGTGAGACGAAGGAGTAG
507	ADOR3B82129	NA	NA	NA	NA	NA	NA	NA	NA	NA	NA	NA	NA	NA	NA	NA	NA	NA	NA	NA	NA	NA	NA	NA	NA	NA	NA	NA	NA	NA	NA	NA	NA	NA	NA	NA	NA	NA	NA	NA	1	NA	NA	NA	NA	NA	NA	ATGAAGCAAATGGATCACTATCGCCATCTATTGAGTGTCGCATATACTATTCTACAAGCAAAAGGTAAAGTACCACAAAAATTAACTATTACCCAACGAGCGTCAAAAATATTTTTCCAAAGTGACAAAAAAATGGCACTGACGATCAATTCTTTATCTACTTTATCCACAATGCAATCTCCTTATTAA
508	ADOR3B82142	NA	NA	NA	NA	NA	NA	NA	NA	NA	NA	NA	NA	NA	NA	NA	NA	NA	NA	NA	NA	NA	NA	NA	NA	NA	NA	NA	NA	NA	NA	NA	NA	NA	NA	NA	NA	NA	NA	NA	1	NA	NA	NA	NA	NA	NA	ATGAAGGATGCCTGCGGCCGCGTACGCTTTTTGCTTGCTGTCCTTTCGTCGAAAGGGAAAGTGCGGGGGAAAGAAAGGGGAAAAAGGGGAATCATCCCCTTTGTGTCCTGCGGGGATAAAGGACGGCCGCCCGCTTTCAACGATCGTTAA
509	ADOR3B82152	NA	NA	NA	NA	NA	NA	NA	NA	NA	NA	NA	NA	NA	NA	NA	NA	NA	NA	NA	NA	NA	NA	NA	NA	NA	NA	NA	NA	NA	NA	NA	NA	NA	NA	NA	NA	NA	NA	NA	1	NA	NA	NA	NA	NA	NA	ATGGGTCAGTTTTCGGTCGAATCCTCTACAGCGTGTCCAGAGATTTTTTCGAAACGCGTCTTCGTGGAGAAGAAAAAGAAGAAGAAAGAAGAGGAAAAAGAAGGAAGAAGAAGAAGAAAAAAAAGAAGAAAAAGAAAGAAGAAAAAGAAGAATAAGAAAAAGAAAGAAGAAGAAGAAGAAGAAGAAGAAAAAAAGAAGAAGAAGAAGAAGAAGAAGAAGAAAAAGAAGAAGAAGAAGAAGAAAGAAGAAAAAGAAGAAGAATAA
510	ADOR3B82159	NA	NA	NA	NA	NA	NA	NA	NA	NA	NA	NA	NA	NA	NA	NA	NA	NA	NA	NA	NA	NA	NA	NA	NA	NA	NA	NA	NA	NA	NA	NA	NA	NA	NA	NA	NA	NA	NA	NA	1	NA	NA	NA	NA	NA	NA	GTAAGTTTTATACGAAAATAATCACGAAAATATCAAATTCATTAAATTCGTTTCGAATCGTGCAAGTTCGTGTACACGGATCGCATATTATTCATTTCACATTCATCGATACCATTCGTGTGTACAGCATCGAAACATTGCGTATGAGTGACGCAACGCAACTTCTTTCTTCAAAATACTCGCACGAGCCCGGAGAGCCTCGTCGGATATTCGATTCGGCT
511	ADOR3B82161	NA	NA	NA	NA	NA	NA	NA	NA	NA	NA	NA	NA	NA	NA	NA	NA	NA	NA	NA	NA	NA	NA	NA	NA	NA	NA	NA	NA	NA	NA	NA	NA	NA	NA	NA	NA	NA	NA	NA	1	NA	NA	NA	NA	NA	NA	ATGAGAGAGAACGAAAGAGGGAGAGAGACTTGGTGGTCGTCGGAGTCGGATTTCAACGGCAGTGGCGGTGGTGGTGGTTGTGGTGGTGGTGGTGGTGGTGGTGGTGGTAGTGGTGGTGGTGATGGTGGTAGTGACAGTATTGGTGGTCGTGCTCTCGTAGATGCACGTGGAGAGCAATGGGAGAGCAATGGTGGTTACTAG
512	ADOR3B82172	NA	NA	NA	NA	NA	NA	NA	NA	NA	NA	NA	NA	NA	NA	NA	NA	NA	NA	NA	NA	NA	NA	NA	NA	NA	NA	NA	NA	NA	NA	NA	NA	NA	NA	NA	NA	NA	NA	NA	1	NA	NA	NA	NA	NA	NA	CTCGGCGAGGAAGAAGAGGACGAAGAGAGGACGGAGACGAAGAAGAAGAAGAAGAAGAAGGAGGAGGAGGCGGAGGAGGAGGAGGAGAAGGGGTGGGAGGAGAGGAGCGAGGGGGGAGGGCCTCGTCTATATGGGCATTCGTTGTCGACTGAATGCCAGTCG
513	ADOR3B82173	NA	NA	NA	NA	NA	NA	NA	NA	NA	NA	NA	NA	NA	NA	NA	NA	NA	NA	NA	NA	NA	NA	NA	NA	NA	NA	NA	NA	NA	NA	NA	NA	NA	NA	NA	NA	NA	NA	NA	2	NA	NA	NA	NA	NA	NA	CCTCCAGGACGGGCGCACACCACGTTCGTCCGGTATCCACGCAGCACCCCTCCCCCTCCATTTGAACCGACGGGCGGGGAGGGGGAAGGGTTAAGCGTGTTTCACACTTGGAGGAATCTTGGATGGACAAAGCACTTTGTCGGGCTTCCCCGTCGTCGTGGCCGTGAAACCGGTCAAGTTGGAGGTTATGTATCTTTATTTTTAGAAGGTATCGAATATTTCGGTTGGAGAAAAGTTCAGGAAGAAAAGAAACCTGAAAAGTGA
514	ADOR3B82183	NA	NA	NA	NA	NA	NA	NA	NA	NA	NA	NA	NA	NA	NA	NA	NA	NA	NA	NA	NA	NA	NA	NA	NA	NA	NA	NA	NA	NA	NA	NA	NA	NA	NA	NA	NA	NA	NA	NA	1	NA	NA	NA	NA	NA	NA	ATGTCGACAAGATCGCTGTCAAGATATTTTGATACAGTATTGTTAGTACCGTGCCAAAATTTTCCGCGATGCAATATTGATAGTGCGACGCCACTGACGAAATATTTCGCCGCCATATTGATAGTGCGACAGCATGGATACAATATTCTTCATTTAATGTCGACAAGATCGCTGTCAAGATATTTTGATACAGTATTGTTAGTACCGTGCCAAAATTTTCCGCGATGCAATATTGATAGTGCGACGCCACTGACGAAATATTTCGCCGCCATATTGATAGTGCGACAGCATGGATACAATATTCTTCATTTAATGTCGACAAGATCGCTGTCAAGATATTTTGATACAGTATTGTTAGTACCGTGCCAAAATTTTCCGCGATGCAATATTGATAGTGCG…
515	ADOR3B82204	NA	NA	NA	NA	NA	NA	NA	NA	NA	NA	NA	NA	NA	NA	NA	NA	NA	NA	NA	NA	NA	NA	NA	NA	NA	NA	NA	NA	NA	NA	NA	NA	NA	NA	NA	NA	NA	NA	NA	1	NA	NA	NA	NA	NA	NA	ATGGTCCGTGGACGCTTAATCGGACTAATATCTCTGATAGTTGAATACCATGTACATGTGGGCCATGTGTCTAACAGGATATTGCACGAGAGTGCTTGCGCGAGAGTTGCAGCCGTGCAGAAACCAATATCCTTAATAATACAGGTACCCGGTACGGGTAAATTAAAGTCAGATATCGGGGTGGTGAGAAATGGATTTTCCCGTGAAATCATGATGGAATTCGATACACAGTGTCGTTCCAGGTATGCCTGGGTATCTGGAAACGGGATGATACGCTTTGTTCGGGAACCGATCGGATTTTCAAAAGGAGCCTTAACAGGCTGA
516	ADOR3B82205	NA	NA	NA	NA	NA	NA	NA	NA	NA	NA	NA	NA	NA	NA	NA	NA	NA	NA	NA	NA	NA	NA	NA	NA	NA	NA	NA	NA	NA	NA	NA	NA	NA	NA	NA	NA	NA	NA	NA	1	NA	NA	NA	NA	NA	NA	ATGGTGGAACGAGGCGCGAAGCTAGTAGTAGCTGGAACGCAAAAGGAGAGGCACGAGGGCGAAAATCTACGAGCGCGGCGGAAGGCGAAGTTCGGCTCGCGGGAGAAGGGAAAAGGAAAAGGAAGGGAGCGTTGGCGGAATGCGAGCGGCGGTAATCGTGGCCTCGTTGAACCGAAAGAGAAGAAGTCAAGGTGGAGGAGGAGGAGGAGGAGGAGGAGGATAACACCTGCTCGCCTGCACGCGAGAAAAGGATACATGCAACGCGGCGATATGCAACGGCGAGAAGAAGCCGCGTGGAAGAATATCCGCGTCGAGGTGGATATACGGTGA
517	ADOR3B82206	NA	NA	NA	NA	NA	NA	NA	NA	NA	NA	NA	NA	NA	NA	NA	NA	NA	NA	NA	NA	NA	NA	NA	NA	NA	NA	NA	NA	NA	NA	NA	NA	NA	NA	NA	NA	NA	NA	NA	1	NA	NA	NA	NA	NA	NA	ATGCGTGGACGAGGAGGAGAAAGAGAGAGCAGTTCCAATGGAGTGGATCTAATCGAACGAATCTTCTCGTTTCTCTCGTTCTTCCGTCGAAATTCAAGGAGTCGAGTGGAAATCTTGGTGGTTTTGCGTGGCGAAGACGAAATGGCAGTTTCGATTGTGTTTTATCGAAATCGGTCGGTGCGAGTGGCGAGGGAGGAGGAGACGTCTGAGGAGATTCTTTTTGAAAAAAGAAAAGAAGGGATCCGCGAAGCGCCTTCGCGACGAGAAACCGAGAATCGTAGTGGTCGGGACGGGGGCACCGGATCCGCCGGTCACACATCCGATTTCAGCGGATTTAAGCGGAGGAAAGTAGGTTTTGAATATTGA
518	ADOR3B82208	NA	NA	NA	NA	NA	NA	NA	NA	NA	NA	NA	NA	NA	NA	NA	NA	NA	NA	NA	NA	NA	NA	NA	NA	NA	NA	NA	NA	NA	NA	NA	NA	NA	NA	NA	NA	NA	NA	NA	1	NA	NA	NA	NA	NA	NA	ATGGCCGCGGGAAATCAGGGAATCGGCGACTCCCACGACGAGTCATCGAGCACACAAACGGCATTATATAACTCTCAACCTGGAGTCCATCCTCTACGGGTCCACTCCGATATAAATAATCGTACGACTCTGCCTCCTCTGCCGTTCGCTGTCCTCTTCGGGTCGAAACTTTTCGAAAACGAAAACTCTGATGCAAAGTTGAATGCGGTTGATGATGAAGTTTCCTCGCAAAAAAGAAAGGATCTAGCGGAATCGGAAGAGTAG
519	ADOR3B82210	NA	NA	NA	NA	NA	NA	NA	NA	NA	NA	NA	NA	NA	NA	NA	NA	NA	NA	NA	NA	NA	NA	NA	NA	NA	NA	NA	NA	NA	NA	NA	NA	NA	NA	NA	NA	NA	NA	NA	1	NA	NA	NA	NA	NA	NA	TGATTTAAGTGATCTACAAAGCACTATGCAGCAAGTCAGTGTTTTGTTCATCGTTTTTAAAATGATTTTGGAAATAGCTTTAGGAAATGGTCTTAGGGAATGGTTTTTAGAGTCATCTGTATTAAATGCCATCCAAATATCTTCCATTCAAGGAAATAAAAAATAA
520	ADOR3B82211	NA	NA	NA	NA	NA	NA	NA	NA	NA	NA	NA	NA	NA	NA	NA	NA	NA	NA	NA	NA	NA	NA	NA	NA	NA	NA	NA	NA	NA	NA	NA	NA	NA	NA	NA	NA	NA	NA	NA	1	NA	NA	NA	NA	NA	NA	ATGGGAGGATATATTCGAGATTCGAATATGTTCACAGGGATTCGTGGAGATTTTAGTGGAGATTTTATATGGAGATTGACGAAGAGTTGGATTGTATTGGTTTTTGTTAGCGAGAATAGTAGGAAATTGGAGATTTCGAAGAAGAGGATTTGGGGAGTGACGCCAG
521	ADOR3B82218	NA	NA	NA	NA	NA	NA	NA	NA	NA	NA	NA	NA	NA	NA	NA	NA	NA	NA	NA	NA	NA	NA	NA	NA	NA	NA	NA	NA	NA	NA	NA	NA	NA	NA	NA	NA	NA	NA	NA	1	NA	NA	NA	NA	NA	NA	ATGGAACTGAAAAAATGGAATCCCAATAAAAATCCCAATAATCCGCTATATGCTAAAAATCATCCCGATTTTCGAAAAAAGACGAGCGATTTCGAAGCGTTTGAGACGGAGAACTCTCCACTTACTTGTAAAATATTCGACAAACATGGAACTGAAAAAATGGAATCCCAATAA
522	ADOR3B82219	NA	NA	NA	NA	NA	NA	NA	NA	NA	NA	NA	NA	NA	NA	NA	NA	NA	NA	NA	NA	NA	NA	NA	NA	NA	NA	NA	NA	NA	NA	NA	NA	NA	NA	NA	NA	NA	NA	NA	1	NA	NA	NA	NA	NA	NA	ATGGGGGCGGGAGGAGGGGAGGAAAGTAGCGGTGAGAAAGAGGATCGAAGGGGAAGGGAGAAAGGGCGGGTGGGGGAGGAAGAAGGAGACGGGAGTGGCTGCCCGACCGGCGGCAGACGCGCCGGGAATAACGCCGACGGAATTACACGGGTGGTGGGTAGAGGCGTGGAGGGTGGTGGCGGCGGTAGCTGCGTTAGCGGATCGACGAGGGCGGAAGGACAGGAGGAAAATCGAGGAAAATTAATTGATAGAGCCTACACAG
523	ADOR3B82220	NA	NA	NA	NA	NA	NA	NA	NA	NA	NA	NA	NA	NA	NA	NA	NA	NA	NA	NA	NA	NA	NA	NA	NA	NA	NA	NA	NA	NA	NA	NA	NA	NA	NA	NA	NA	NA	NA	NA	1	NA	NA	NA	NA	NA	NA	ATGTCCACAGTGTTATTGGATAGTGTATTGGATAAGATACCCATTAAAGATCCGCAAACTGGCGAGATGAATATAGAGAAGGTTTTAGAGAATACCAATGTTTTGGGAAAACATTTTGAACTACCAGAACTTCGAGAGTTACCAGAACTTTTTGAATCTTTGAATCTCTCGAACTTCTTTTAG
524	ADOR3B82223	NA	NA	NA	NA	NA	NA	NA	NA	NA	NA	NA	NA	NA	NA	NA	NA	NA	NA	NA	NA	NA	NA	NA	NA	NA	NA	NA	NA	NA	NA	NA	NA	NA	NA	NA	NA	NA	NA	NA	1	NA	NA	NA	NA	NA	NA	ATGGACGAATTTCTGTTTATGAGTTTAAGCTGGGACATATCGAAAGAGGAATCCAAGAGGATTCAAAGAATTAGGTGGTTTCAAAATTCAGATCTGGAAACGAGAATCTCGAAATCCGTATTAAACAAAGATAAATTGAAAGGCAAAGTGGAGGCAGACGTGTTTCCAATCGCAGTTTTCAGACGTTTGAGTGCAATGGGGCTAATGGTAAAACGGTAA
525	ADOR3B82244	NA	NA	NA	NA	NA	NA	NA	NA	NA	NA	NA	NA	NA	NA	NA	NA	NA	NA	NA	NA	NA	NA	NA	NA	NA	NA	NA	NA	NA	NA	NA	NA	NA	NA	NA	NA	NA	NA	NA	1	NA	NA	NA	NA	NA	NA	ATGGAGAAGAAGCGAAGAGAAAAGTCACGTAAAAAGGAGGTGACAACAACAAAGTGGAAGCAGCAAAAACTAGAGGAAGAAAGAGAAAGAGAAAAAAAGGAGAGGGAGAAGGAGAAGCACGAAGAAGGAAGAAGTATACTCACGACCGGAAGCCCTCTGCCAGGCTGGGCTTGA
526	ADOR3B82253	NA	NA	NA	NA	NA	NA	NA	NA	NA	NA	NA	NA	NA	NA	NA	NA	NA	NA	NA	NA	NA	NA	NA	NA	NA	NA	NA	NA	NA	NA	NA	NA	NA	NA	NA	NA	NA	NA	NA	1	NA	NA	NA	NA	NA	NA	ATGTCACTTCGCGAGAGCGAGAAAACGACTCTTGAATCATTCTCAAATGGACTCTTAACTCTCTTGCAACAAGAAGAAGAAAAAGACGAAGAAGAGGAAGAAGAGGAGGAAGAAGAAGAAGAAAATTCTCGAAAAAGGAGAAAAATTCGATCGATTTGCCGACTTGGTCGCGAGACGATAATGGTGATAATGCGTGGTGGATAA
527	ADOR3B82258	NA	NA	NA	NA	NA	NA	NA	NA	NA	NA	NA	NA	NA	NA	NA	NA	NA	NA	NA	NA	NA	NA	NA	NA	NA	NA	NA	NA	NA	NA	NA	NA	NA	NA	NA	NA	NA	NA	NA	1	NA	NA	NA	NA	NA	NA	ATGCATCAGAAGATCTCAGATGCATTATTCCAAGCGAAACGAGTTAAAGAAGAAGAAGGAGAAGGAGAAGAAGAAGGAGAAGAAGAAGAAGAAGAAGAAGGCTTCCATCAATCGCTATCACGATCTCTGATTATAAATTCTTCGTCATAA
528	ADOR3B82267	NA	NA	NA	NA	NA	NA	NA	NA	NA	NA	NA	NA	NA	NA	NA	NA	NA	NA	NA	NA	NA	NA	NA	NA	NA	NA	NA	NA	NA	NA	NA	NA	NA	NA	NA	NA	NA	NA	NA	1	NA	NA	NA	NA	NA	NA	TCTTTACAAAGGGCTCGTTCGTTAAAACAATATTTTCAACGTATATTCAATATATCGTTGAAAAACGTTGTTCTAATTTCCGGAACAATCGATTTGGATTTTATTTTTTTCGAGGAGGAAGGCTCGATTCGATTGGAACTTTGAACACATCGTCCGACACTGGCGATCCCACT
529	ADOR3B82268	NA	NA	NA	NA	NA	NA	NA	NA	NA	NA	NA	NA	NA	NA	NA	NA	NA	NA	NA	NA	NA	NA	NA	NA	NA	NA	NA	NA	NA	NA	NA	NA	NA	NA	NA	NA	NA	NA	NA	1	NA	NA	NA	NA	NA	NA	ATGCTGCGGAAGAAGACGACGACCACGGAGAAAGAGCCCGGCACCACTGGCCGCGGTATTCACATGCACATCATCATCGCCATCAACCTCCTCTTCATCATCACCACCACCACCACCACCACCACCAAAGTATTTGCCTGCAGTGCAGGCAGCGGCGCTGACAACGCTGCCCTTAAAGTCTCTACACTTTCTCTACGGCCTACTCGAACGTGA
530	ADOR3B82272	NA	NA	NA	NA	NA	NA	NA	NA	NA	NA	NA	NA	NA	NA	NA	NA	NA	NA	NA	NA	NA	NA	NA	NA	NA	NA	NA	NA	NA	NA	NA	NA	NA	NA	NA	NA	NA	NA	NA	1	NA	NA	NA	NA	NA	NA	ATGGATAAAACGGGTGAAGAGGTATTCGACGTAACAGCTGTAAGTCGCGTTTCCCGCGAATCTAGCAGAGAAGAACCTATCTGCGCACGACACACCGTTAGAGGAACGGTGAAGCCGAAGAATCTCGACGCGTCACGTGGTTTAATCGGGTAG
531	ADOR3B82279	NA	NA	NA	NA	NA	NA	NA	NA	NA	NA	NA	NA	NA	NA	NA	NA	NA	NA	NA	NA	NA	NA	NA	NA	NA	NA	NA	NA	NA	NA	NA	NA	NA	NA	NA	NA	NA	NA	NA	1	NA	NA	NA	NA	NA	NA	GCTGGCATACGAAATGAAATTCCTGAGGGTTGCGGTCGGGCTGGAACACAGGGAGCGACTGCTCGGCGGGGTGGTTCGGTTCGAGGAGGAGAGATGGCGAACACGTTGGTACAGGGTGGAGGTCGAAGGGAGGTTGGGGGTCGGTCGGTGCGAGCGAGGGAGCGGCGGTGGGTGTAGGGGCCGGCCAGGGCTCGCAGAGAAGCGGATCGAAG
532	ADOR3B82314	NA	NA	NA	NA	NA	NA	NA	NA	NA	NA	NA	NA	NA	NA	NA	NA	NA	NA	NA	NA	NA	NA	NA	NA	NA	NA	NA	NA	NA	NA	NA	NA	NA	NA	NA	NA	NA	NA	NA	1	NA	NA	NA	NA	NA	NA	ATGGCAGAAAATCTCGTATTTGAATCCCTCTTTATAAAGTCTTCCCCTCTATCTGCTGTTGGTGTCGCACTTGGGATCTCAATTCTGCATTTTTGGATATGGAAACAACTACTTCCATTTCTTTTATTGCCTTTAACATTAGGACACTTATGTCAAGAGTAG
533	ADOR3B82319	NA	NA	NA	NA	NA	NA	NA	NA	NA	NA	NA	NA	NA	NA	NA	NA	NA	NA	NA	NA	NA	NA	NA	NA	NA	NA	NA	NA	NA	NA	NA	NA	NA	NA	NA	NA	NA	NA	NA	1	NA	NA	NA	NA	NA	NA	ATGGAAAATTTACAGAAATACAAGCAAAAATCAACACTTGACATCAATGCAATAATTTTTAATATTATAAAAGAAGTAGAAGTCGTGGTTTCCGTGAACAAAACATTTTTAGGAGACATGCGTGCGATATCTCCAAATGGCAGCTTTCCACCTGAAACGATAACAATTTTAACTGCAACAAAGGACAATAATACGGATTCTGTTAGTTTGAAGAAAGTTAGATTGGTGTGGTTTTATCTTCAAAGGTTGTATCATGGACGAGCAGAATGA
534	ADOR3B82321	NA	NA	NA	NA	NA	NA	NA	NA	NA	NA	NA	NA	NA	NA	NA	NA	NA	NA	NA	NA	NA	NA	NA	NA	NA	NA	NA	NA	NA	NA	NA	NA	NA	NA	NA	NA	NA	NA	NA	1	NA	NA	NA	NA	NA	NA	ATGGGAAGTGCTACTATACCCATCATATTTGCCAGATCTGATATCCTCGGATTACCACCTGTTTCTTTACAGAATTCTTTAAATAGCAAAATGAGGATATCAAAAACTATTTGGATCAGTTTTTTGCAAACAAAGATCAAAAGTTCTACGAGTATCATTACTACAACCTAA
535	ADOR3B82322	NA	NA	NA	NA	NA	NA	NA	NA	NA	NA	NA	NA	NA	NA	NA	NA	NA	NA	NA	NA	NA	NA	NA	NA	NA	NA	NA	NA	NA	NA	NA	NA	NA	NA	NA	NA	NA	NA	NA	2	NA	NA	NA	NA	NA	NA	ATGGAATCTGGTTCAGCTGTGTGGATTCGAATGAACGAATATTTGCAGACTGGGAGATATATGGAATATCTTGGTTTATTCCTGGACAATTTCTGGTACAACTTCGAAATGCATTTCGAGCGTCTTATCCTCCGCTTTGAGAAAATTGTAAGAACTCTTGAATTTAGAGATTATCAGAGGATATCAAATGGTTTCTTAAGCCGTAGCTATGATTTTAACAGATCTTCTGTTTCATCTCTTCGCGGAGGCTTCCATCTTAGTCTTCAAGGAGATGGCATCAGAGGAATTGTCTTGCCTGGGACAATTCAATCTCTGAAGCATTGA
536	ADOR3B82324	NA	NA	NA	NA	NA	NA	NA	NA	NA	NA	NA	NA	NA	NA	NA	NA	NA	NA	NA	NA	NA	NA	NA	NA	NA	NA	NA	NA	NA	NA	NA	NA	NA	NA	NA	NA	NA	NA	NA	1	NA	NA	NA	NA	NA	NA	ATGAAGAGATTATTAGTGGGATGGATTTTTGCCAAGGTAAAAGTTGAAACGGAAACAACTTCAATGTTTCTGTTACCTGTGGAAAGTCACATTATTGCTAATTGCACGGGTAACACAGATCTTAGCGACTGTTGCTATAATTGCAGACAGGCGGGGCACAAAATTAACGGATGTTCTGCCTCACCATATTGCCTCGCTTGCTGTAGTATGGCTCCACCCGGTCATAAAATTGATTTGAAAGCATGCAAAAGGAAACAGAAAAAGGAGGAGGAGTCAAGAAAAAGCAACAAAGAGCAGCAACGATCCAGCGAAGAAAATAGATTGGAATATGGATGGAAAAAAAAAGGTTCTTCTTGCTGCTTTTGCGTCGGAGAGGTGCTTTTGATCCAGCTCGGGCGA…
537	ADOR3B82327	NA	NA	NA	NA	NA	NA	NA	NA	NA	NA	NA	NA	NA	NA	NA	NA	NA	NA	NA	NA	NA	NA	NA	NA	NA	NA	NA	NA	NA	NA	NA	NA	NA	NA	NA	NA	NA	NA	NA	1	NA	NA	NA	NA	NA	NA	ATGCCAGATTTTCTTCCTTTATTACCACCATTGTGCCCACTCCAAAGGCCTTTGATACCATGTCTCCTGTTTGTTTCGCTGTTGAAGTTGGTACAGATAGTCGCCATTGTTTCCAGAACTGTTGGTACATTGCCTGCAGCAGCTGAAAACAAGTCAGACGATTCATCTTGA
538	ADOR3B82329	NA	NA	NA	NA	NA	NA	NA	NA	NA	NA	NA	NA	NA	NA	NA	NA	NA	NA	NA	NA	NA	NA	NA	NA	NA	NA	NA	NA	NA	NA	NA	NA	NA	NA	NA	NA	NA	NA	NA	1	NA	NA	NA	NA	NA	NA	ATGTATGCTTTTTGCAAATTTTGTGGCAGAAAACACAATATCTTTTTGCAAGATAGTAATACCAATACACACAGTAATACCAATAAGATACGAAATGATTCTGCAATATTATTAACTGCATTTTTGATAATAACAGACAAGGAAACAGTGAATGAGATACAACAGACAAAACCTATTATTTTATCATACTTTTTGCAATCACCACCAGAAATAGTAATTTTATCTATAGCAAGTGATCGTAAAGGATCAATATGGATTCAAACACGAATGTAG
539	ADOR3B82336	NA	NA	NA	NA	NA	NA	NA	NA	NA	NA	NA	NA	NA	NA	NA	NA	NA	NA	NA	NA	NA	NA	NA	NA	NA	NA	NA	NA	NA	NA	NA	NA	NA	NA	NA	NA	NA	NA	NA	1	NA	NA	NA	NA	NA	NA	ATGACAATCTTTGGATTTAGCGATCAAGAGGACAAACAATATTTTTGGAAATGCATTCAACGATACTTTAATTATTATTCTGATAAAATTGCTGGGAATAATCTTGCAAATGTTGGAAATTTTGAAAATGAGATGACAATCTTTGGATTTAGCGATCAAGAGGACAAACAATATTTTTGGAAATGCATTCAACGATACTTTAATTATTATTCTGATAAAATTGCTGGGAATAATCTTCGAAATGTTGGAAATTTTGAAAATGAGATGACAATCTTTGGATTTAGCGATCAAGAGGACAAACAATATTTTTGGAAATGCATTCAACGATACTTTAATTATTATTCTGATAAAATTGCTGGGAATAATCTTCGAAATGTTGGAAATTTTGAAAATGAGATG…
540	ADOR3B82337	NA	NA	NA	NA	NA	NA	NA	NA	NA	NA	NA	NA	NA	NA	NA	NA	NA	NA	NA	NA	NA	NA	NA	NA	NA	NA	NA	NA	NA	NA	NA	NA	NA	NA	NA	NA	NA	NA	NA	2	NA	NA	NA	NA	NA	NA	ATGAAAGAGTTTTATAAGAATATTAGAGCTTGCATAAATACGTTGTGCAAATCGTGGACAGAGATAACTGCGGAAAATATAAAAGATGCTTGGAATAAAATTCTCACGTTGCCTCCAAAACAAACTGGAACAACAGATTTACTTGGATCGGAGAATCAAGCGGTGATCGTCGATCTTTTAAATGTACAAATAAAGAGCAAACAGAAAGGTAGAATAAAAAATTCAAGTATTAGCGCCATCTCGTGTACTGCAGAAGAAACGAATATAGACGAAGAGAATAAATTACATAGAGACAAGGATGGAGATAAGAATTGA
541	ADOR3B82357	NA	NA	NA	NA	NA	NA	NA	NA	NA	NA	NA	NA	NA	NA	NA	NA	NA	NA	NA	NA	NA	NA	NA	NA	NA	NA	NA	NA	NA	NA	NA	NA	NA	NA	NA	NA	NA	NA	NA	1	NA	NA	NA	NA	NA	NA	ATGACAGCAGTTCAAGACGCGAATTCTCAAATCCCTTCCTACTTCTTCCCAAATGATTTTCCTCCAATGAATCGATCGATTCGAGTAAGAAATTGGAAGTTAAAAGTTCAGCAACAAGATCCGCAAAGAATAATTTCCATCGATCGACGTACTCCACAAGTTTCGGGATCAATCCGTCACGAAAGTTGGGAAGGAAATTTTCGTGGCCAACGGGATGGGGATATCCCTATGGTGGAATTTAACGGCGGAGGTAAAAGTTGCTCGTTAACGAGATGGAGCTAG
542	ADOR3B82373	NA	NA	NA	NA	NA	NA	NA	NA	NA	NA	NA	NA	NA	NA	NA	NA	NA	NA	NA	NA	NA	NA	NA	NA	NA	NA	NA	NA	NA	NA	NA	NA	NA	NA	NA	NA	NA	NA	NA	1	NA	NA	NA	NA	NA	NA	TTGGAAAATAAGAAACGGCGTCAACAATTACGCGACGACAATTATCGGGGAACGCAATTACGACTACGCGCCACTGCCACGCCGTTGCCGCAAATTTCCTCCCGGCGAATCCGCTCCTCCACCGGAGTCCCTCCCCGCGCCGCGTTCTCGTGGCATACGCGCGAGGGGGTGGGCAGAGGGAGGGAGGAGAAGCGCGGGGAGAGGGGAAGGGAAGAGCGGCGGTCAGCAGGCGAGGAAAGTAGAGAGGAGGCAGTGGTGGGTGGCCGCGAGGCGAACAGTCGAGCGGAGAGGTTCTCGCGCGGCGGCTCGCCTGAGCCCGCGCGGAACTCGCGACCAGGCGCCGCCGAGCCGTACCGGCGCGTCCAGTCCGCGTGCTCGCGCAGGAGGGGGCGAACGAAG…
543	ADOR3B82374	NA	NA	NA	NA	NA	NA	NA	NA	NA	NA	NA	NA	NA	NA	NA	NA	NA	NA	NA	NA	NA	NA	NA	NA	NA	NA	NA	NA	NA	NA	NA	NA	NA	NA	NA	NA	NA	NA	NA	1	NA	NA	NA	NA	NA	NA	ATGATTTTTAAGCCAAAGTTGGTGATCGATAGAAGTTTCCGCATGTCAAGTGGCGTTACTTGCGGACGAAATGGGAACTTTGTTCCAAGTAACTACGTCGAAAGAGAAGAAGAAGAAGAAGAAGAAGAAGAAGAAGAAGAAGAAAAAAGAAGAAGTAGAGTTTAA
544	ADOR3B82378	NA	NA	NA	NA	NA	NA	NA	NA	NA	NA	NA	NA	NA	NA	NA	NA	NA	NA	NA	NA	NA	NA	NA	NA	NA	NA	NA	NA	NA	NA	NA	NA	NA	NA	NA	NA	NA	NA	NA	1	NA	NA	NA	NA	NA	NA	ATGTATCACCGAGGTGGAAAGAGGTTTGAATCGGAAGGCGAAGGCGAAGGATCGGAGAATCGGTTCGTAGTTGGAACGTACGAAGAGGACGAAACGAGGTTTGATAAAGAAGAAGAAAAAGAAGAAGAAGAAGAAGAAGAAGAAGAAAAGGTTCGTAATAAAGAATTTTTTCGCCAACGATTTCGTACGTGGAAAGTTGGTCGGTAA
545	ADOR3B82413	NA	NA	NA	NA	NA	NA	NA	NA	NA	NA	NA	NA	NA	NA	NA	NA	NA	NA	NA	NA	NA	NA	NA	NA	NA	NA	NA	NA	NA	NA	NA	NA	NA	NA	NA	NA	NA	NA	NA	1	NA	NA	NA	NA	NA	NA	ATGGAAGCACGCCATGTGTATAAGGAAGCTTCGATAACGCGTACAACGTGCGCCAACGATTCGAACAAGTGGCATTACAAGAGCGGAAAGAAAGATCGGCTACGGCCCGGTTCGCTCTACTACGCCGTATTTTCGAAACCGTATCACGTAGAAACGTTTTGCAAGGGAATCGCTCGTTTACAGAGGAATAATCGTTGCATACGACGCGTGACACTCTCTACCTGGTGGAATTTCGCCAAGCCCGACTACGTAGAGCAAAGCACCGATGGATATGGCCGCGCTACGACGCGCTCGACCGGCTGGCTACTACACCGTCCCGTGATAAAGAGAGGAAAAGAAAGAAGACGGGACAAAGGTCTGACAAAGGAAGACGAGGAGGAGCAGGAGGAGGGGAGGAGG…
546	ADOR3B82438	NA	NA	NA	NA	NA	NA	NA	NA	NA	NA	NA	NA	NA	NA	NA	NA	NA	NA	NA	NA	NA	NA	NA	NA	NA	NA	NA	NA	NA	NA	NA	NA	NA	NA	NA	NA	NA	NA	NA	1	NA	NA	NA	NA	NA	NA	ATGCCTAATCGCAATAATAATAGTAGTAGTAGTAGTAATAGTAGTAGTAATAGTACTAGTAGTAATAGTAGAAGTAATAGTAGTAGTAATAGTAATAGTAGTAGTGGTAATAGTAATAGTAATAATTATAATGAGGAGAATAAGAGTAATTACGTAAAGTAA
547	ADOR3B82439	NA	NA	NA	NA	NA	NA	NA	NA	NA	NA	NA	NA	NA	NA	NA	NA	NA	NA	NA	NA	NA	NA	NA	NA	NA	NA	NA	NA	NA	NA	NA	NA	NA	NA	NA	NA	NA	NA	NA	1	NA	NA	NA	NA	NA	NA	ATGGGCCCCAAGATTAGATCTTTATTGAACAAAGAAAAAATCGAAAGTCAAAGTGGAAGCGGAGTTAGACACATCTCCAATCACAATTTTCAAACATTGGACGCAATGGATAAAAAAAATTGGAAAAAGAAGAAAAATTTGGAATTGTGTTTATCGCGTAAAACTAGAAGTTCATTTTTGAATAAAATTATGAGATACTATATAATCGTACACGATCGATTGGATATGCTAATGGAAAATCCTGTACAAATACCAAAACCATTATGA
548	ADOR3B82442	NA	NA	NA	NA	NA	NA	NA	NA	NA	NA	NA	NA	NA	NA	NA	NA	NA	NA	NA	NA	NA	NA	NA	NA	NA	NA	NA	NA	NA	NA	NA	NA	NA	NA	NA	NA	NA	NA	NA	1	NA	NA	NA	NA	NA	NA	ATGATGATAGTTGACTGTGACAATGGTGATGACAACGTGGATGGAACGTTAACGTCAACACCAATGCCAACAATGACGACTATTGATGACGGTATGGCGCTGATTATCGTGATAGTAATAAAGATAATGGCGACGGTAATGGTGACTATAACGGTGACGATAACGACGACAACGACAGCGACGACGACAACGATGATGATTATAATGATGATAATGATGATAATGGTGATGATGATGGCAATGATAATAATTTTTATGGGAATGATTATGAATTTTCGAAATCGAAAAAATAATTCGCCAATGATATCTTCCAGGCAGACGAAATAA
549	ADOR3B82443	NA	NA	NA	NA	NA	NA	NA	NA	NA	NA	NA	NA	NA	NA	NA	NA	NA	NA	NA	NA	NA	NA	NA	NA	NA	NA	NA	NA	NA	NA	NA	NA	NA	NA	NA	NA	NA	NA	NA	3	NA	NA	NA	NA	NA	NA	ATGAACACCCCACACAACAACAACAATAACGATAAAAACAACGACAATAATGGGGATGATGACTGTAACGATGCAATAAATGATAATGATGATAATGATAATAATGTTGATAATGTGACAATAGCAGAGAGCAGCGGCAGTAGTAGCAGTAATGGTGATGATGCCAATAACAATGATAAGTAA
550	ADOR3B82444	NA	NA	NA	NA	NA	NA	NA	NA	NA	NA	NA	NA	NA	NA	NA	NA	NA	NA	NA	NA	NA	NA	NA	NA	NA	NA	NA	NA	NA	NA	NA	NA	NA	NA	NA	NA	NA	NA	NA	3	NA	NA	NA	NA	NA	NA	ATGGAGGGTGAAGAAACGGTGTGGCAGAGAGTAGCGAGAGGAGAGACAGACGGACGACGACAACTCGTCGTCGAGCTACGTGCACCGCTACGTATCATCCCGTTACTCGAGCGGCAGATTGCACAATGTGGGTGGACGATTACACGTGGGTGTGTCCCACGTGTTCTGCCTCACGGTTCCAATTGTTACGTGTCGTCGTTATTTAGCGAAAGAAATAAAGAAGGGAGAGGCGGAGGGGGAGGAAAAGAAAAAGAAAAACAGAAACGAAATGAGAGGGAAGAAGAGAGAGAGAGAAAAGAGAAAAAAGGAAGAAAAAGACAGTATGACAGTATGATGTGCCAACGTTGGCATCAGCAACGTTGGGATAGAACCGGGTTAGACGCAAGACGAGCGTACGGG…
551	ADOR3B82447	NA	NA	NA	NA	NA	NA	NA	NA	NA	NA	NA	NA	NA	NA	NA	NA	NA	NA	NA	NA	NA	NA	NA	NA	NA	NA	NA	NA	NA	NA	NA	NA	NA	NA	NA	NA	NA	NA	NA	1	NA	NA	NA	NA	NA	NA	ATGCGGGATGGAAGAAGAAAACGGGAGAGAAAAGAAGAGGAGGAAGAAAAAGAAAAACAAAAAAGAACAAGAAGAACAAGAAAAAAAAGAAGAAAAAGAAAAAGAAGAAGAAGAAGAAGAACAAGAAAAAAAAGAAGAAAAAGAAAAAGAAGAAGAAGAAGAAGAAGAAGAAAAATAAGAAGAAAAAGAAGAAGAAGAAGAAGAAAAAGAAGAAGAAGAAGAAGAAAAAGAAGAAGAACAAGAACAAGAAGAACAAAAAAAAAGAAGAAAAAGAGGAGGAATAAGAACAAGAAAAAGAAGAAGAACAAGAACAACAAGAACAACAAGAACAACAAGAAGAATAAGAAAAAGAAGAAGAACAAGAAGAACAAGAACAACAAGAACAACAAGAAGAATAAG…
552	ADOR3B82449	NA	NA	NA	NA	NA	NA	NA	NA	NA	NA	NA	NA	NA	NA	NA	NA	NA	NA	NA	NA	NA	NA	NA	NA	NA	NA	NA	NA	NA	NA	NA	NA	NA	NA	NA	NA	NA	NA	NA	2	NA	NA	NA	NA	NA	NA	ATGCTTAAAGTAGAATATTTGTGCATGCTTAGTAGTAGCAGTAGTAGTAGTAGTAGTAGTAGTAGTAGTAGTAATTTTGGTATTAAAAATGGTGGTTTAGATTGTCGCGTCGGTTTTCTCTTAAAACTCCTTTTACTGTTCGTTTTGCACAACGATCAAAGATGGAACGTTTTGCAATCTTACAGTCAAAAGGAAGGTTTATCATGA
553	ADOR3B82450	NA	NA	NA	NA	NA	NA	NA	NA	NA	NA	NA	NA	NA	NA	NA	NA	NA	NA	NA	NA	NA	NA	NA	NA	NA	NA	NA	NA	NA	NA	NA	NA	NA	NA	NA	NA	NA	NA	NA	2	NA	NA	NA	NA	NA	NA	ATGCATAGATTTAAGAAGAGTAAAGAAAAGAGTAAAGAGAAAAAACGAGGAAAGAAAAGAATTATTGATGAAAATTGTATGTTGGAACAGGTATGTGATAGATTTGAGTTTGAGGAATTAATATATAAGAAAGAATTTTGTCATTTAGTACAACAAGGATTGTTTTTCTCATTTGATTTATGGCAAATAATTCGCATAATGGAAATTTTTGAATTTTGGATTTAG
554	ADOR3B82451	NA	NA	NA	NA	NA	NA	NA	NA	NA	NA	NA	NA	NA	NA	NA	NA	NA	NA	NA	NA	NA	NA	NA	NA	NA	NA	NA	NA	NA	NA	NA	NA	NA	NA	NA	NA	NA	NA	NA	2	NA	NA	NA	NA	NA	NA	GGAGATATAAAAGAAGGAAGAAAAGATCGCGAAACTGTCCCCTACGACCATATTATACCGTATATCATATCGTTCAACGGTATACGTAAAACCGGTGTCTTTCGCTCGTTGCAGTATATTATCGGTCGCGTATATCACGGTGTCGCTGCTTCCTCGTACCAGCAGTGCAAAGTGGTGGTGCCGGTGGCTAGACGAGAGGAGCAGGCGGAAGAAAGGCGGAGGAAGTTACGAGACGAGGCTCGTCCTTTTCGTCGTCGTCGTCGTGCACGGGAATCGAGCCGAATGATGCCCAATTGA
555	ADOR3B82456	NA	NA	NA	NA	NA	NA	NA	NA	NA	NA	NA	NA	NA	NA	NA	NA	NA	NA	NA	NA	NA	NA	NA	NA	NA	NA	NA	NA	NA	NA	NA	NA	NA	NA	NA	NA	NA	NA	NA	1	NA	NA	NA	NA	NA	NA	ATGAGCATCGGTCGTTGCCTTCGATCGTTCGCGAGTAGAGGAAAAGAAGAAGAAGAAGAAGAAGAAGAAGAAGAAGAAGAAAAAGAAAAAGAAGAGGAGGAGGAGGAGGAGGAAGAAAAAAGAAGACATTCCGCGTTAACACGGAACGAA
556	ADOR3B82459	NA	NA	NA	NA	NA	NA	NA	NA	NA	NA	NA	NA	NA	NA	NA	NA	NA	NA	NA	NA	NA	NA	NA	NA	NA	NA	NA	NA	NA	NA	NA	NA	NA	NA	NA	NA	NA	NA	NA	1	NA	NA	NA	NA	NA	NA	ATGAGTGAACTCCCATTCACAATTGCTTCAAAGAGAATAAAATACCTAGGAATCCAACTTACAAGGGATGTGAAGGACCTCTTCAAGGAGAACTACAAACCACTGCTCAAGGAAATAAAAGAGGATACAAACAAATGGAAGAACATTCCATGCTCATGG
557	ADOR3B82462	NA	NA	NA	NA	NA	NA	NA	NA	NA	NA	NA	NA	NA	NA	NA	NA	NA	NA	NA	NA	NA	NA	NA	NA	NA	NA	NA	NA	NA	NA	NA	NA	NA	NA	NA	NA	NA	NA	NA	1	NA	NA	NA	NA	NA	NA	ATGGAAGAACATTCCATGCTCATGGGTAGGAAGAATCAATATCGTGAAAATGGCCATACTGCCCAAGGTAATTTACAGATTCAATGCCATCCCCATCAAGCTACCAATGACTTTCTTCACAGAATTGGAAAAAACTACTTTAAAGTTCATATGGAACCAAAAAAGAGCCCACATCGCCAA
558	ADOR3B82469	NA	NA	NA	NA	NA	NA	NA	NA	NA	NA	NA	NA	NA	NA	NA	NA	NA	NA	NA	NA	NA	NA	NA	NA	NA	NA	NA	NA	NA	NA	NA	NA	NA	NA	NA	NA	NA	NA	NA	2	NA	NA	NA	NA	NA	NA	ATGGAGCAATGGAAGAAAACGATCATCAGATCTTTGGTAAATGTAAATTTGGACGATGATGGAGATATGCATCTTATATTTTACAAATTTAGCAGAATGGAGCAATGGAAGAAGGCGATCATCGGATCTTTGCAGAATGGAGCAAAGAAGGCGATCATCGGATTTTTGGTAAATTGA
559	ADOR3B82471	NA	NA	NA	NA	NA	NA	NA	NA	NA	NA	NA	NA	NA	NA	NA	NA	NA	NA	NA	NA	NA	NA	NA	NA	NA	NA	NA	NA	NA	NA	NA	NA	NA	NA	NA	NA	NA	NA	NA	1	NA	NA	NA	NA	NA	NA	ATGTTACGCGCACTATTTGTCCTCTCGTTCGGGACTTTGCCCTTTGCAACGATTGGCCCGTTATGTCATCTCGGCTACCTGCAGTCTTGGAGGGAACGAAAAGAAGAAGAAGAAGAAGAAGAAGAAGAAGAAGAAGAAGGGAAAAGAAAAAGGAGAACGTGCCGCCTCGGGTCCGATGCAAACGAGCGAAGTAGGTCGTCTTCCTAA
560	ADOR3B82483	NA	NA	NA	NA	NA	NA	NA	NA	NA	NA	NA	NA	NA	NA	NA	NA	NA	NA	NA	NA	NA	NA	NA	NA	NA	NA	NA	NA	NA	NA	NA	NA	NA	NA	NA	NA	NA	NA	NA	1	NA	NA	NA	NA	NA	NA	GACTTCGAACGATATTTTTCGGATGGCTTTCAAATTGCGATCCAAAATTCCTGTTATAAAGCTTCGAGAACAATTTTTGGGATGCAAAAGTGCGAGGGCTTCGAATGTGGCGATATTTTTCTTTGGCTTTCAAATTGCAATCCAAAATTCCTGTTATAA
561	ADOR3B82484	NA	NA	NA	NA	NA	NA	NA	NA	NA	NA	NA	NA	NA	NA	NA	NA	NA	NA	NA	NA	NA	NA	NA	NA	NA	NA	NA	NA	NA	NA	NA	NA	NA	NA	NA	NA	NA	NA	NA	1	NA	NA	NA	NA	NA	NA	AAGGTTTCTCAGGAAGTCGGCAAGCGCTGTGTTGAATCAGAGGATCGGGGCTGGTCCCGAGGGAGAGGAGGACGGGGCCGTGGCAGGGAAGAGGAGGAGGTTGACAAATGGCCAGAGCCAGAGGAGGATCAAAGGGACGAGGAACGTAGACGAGGATTCGGATACGGTGAATAA
562	ADOR3B82485	NA	NA	NA	NA	NA	NA	NA	NA	NA	NA	NA	NA	NA	NA	NA	NA	NA	NA	NA	NA	NA	NA	NA	NA	NA	NA	NA	NA	NA	NA	NA	NA	NA	NA	NA	NA	NA	NA	NA	1	NA	NA	NA	NA	NA	NA	ATGTCAAATGTCGGCGAGTATGACGGCGACGGGATGATGCGCGCACGCTGTGGACAGAGCGCAAGAGCACAAGTCGTCTTCGAAGTAACGTTGAACGTGAATAATGGAGAACCTACTGTCGCATCTACTTCGCAAGGCGTAACAATGGCCGACGCAGCGCTATTTAATCATCAATCTTAA
563	ADOR3B82488	NA	NA	NA	NA	NA	NA	NA	NA	NA	NA	NA	NA	NA	NA	NA	NA	NA	NA	NA	NA	NA	NA	NA	NA	NA	NA	NA	NA	NA	NA	NA	NA	NA	NA	NA	NA	NA	NA	NA	1	NA	NA	NA	NA	NA	NA	TAGTAGTAGTAGTAGTAGTAGTAGTAGTAGTAGTAGTAGTAGTAGTAGTAGTACTAGTAGAAGTAGTAGCAATAGTAGTAGTAGTAGCAGTAGCAATAGTAGTAGTAGCAGTAGCAATAGTAGTAGTAGTAGCAGTAGCAGTAGTAGTGGTAGTAGTAGTAGTAGTAGTAGTAGTAGTAGTAGTA
564	ADOR3B82494	NA	NA	NA	NA	NA	NA	NA	NA	NA	NA	NA	NA	NA	NA	NA	NA	NA	NA	NA	NA	NA	NA	NA	NA	NA	NA	NA	NA	NA	NA	NA	NA	NA	NA	NA	NA	NA	NA	NA	1	NA	NA	NA	NA	NA	NA	ATGCCAGAAACTACAACGGAAAGTCCAACTCCGCCGACCACTACGACTGAAATTACTCCTACTACAACTGAAGAAACAACCTTAACTACGACAACGTCGCCAGAAACAACAATAATACCAACAACTACTACCACAACACCTATGACAGAAACTACAACGGAAA
565	ADOR3B82498	NA	NA	NA	NA	NA	NA	NA	NA	NA	NA	NA	NA	NA	NA	NA	NA	NA	NA	NA	NA	NA	NA	NA	NA	NA	NA	NA	NA	NA	NA	NA	NA	NA	NA	NA	NA	NA	NA	NA	1	NA	NA	NA	NA	NA	NA	ATGGGATTAAGGTATGCAGCAATAAATCGTATAGGCAATATCGTGCTAAGCATTATATTTTCCTACATGAAGGTAATTAAATCGACTTTAATCATTGAGGAGATCATAGAGGAATCATCTGCAAGTACTGTTTCACAATTATTATGTTCTGTGTATTGTACCGACAAGTTAGAATGCATTAATGCTTTCGTCAGCAATAATCCACATTATTGA
566	ADOR3B82519	NA	NA	NA	NA	NA	NA	NA	NA	NA	NA	NA	NA	NA	NA	NA	NA	NA	NA	NA	NA	NA	NA	NA	NA	NA	NA	NA	NA	NA	NA	NA	NA	NA	NA	NA	NA	NA	NA	NA	1	NA	NA	NA	NA	NA	NA	ATGATAATTGCAAATAAATGTAATAGTCGAGGTTGTATGAAAATTATATCAATTATAATAGCTACGAATAAATGTGATTTAGGAAGAATATTCAAGTTTCTGAAATACTTGAGCTTGTACCAGAATCGTTATGGAATTCTGAGCTATTTGACTTCCTATGGTACCAGTGATGGGCGAAATTTAATTAGTCGAACAAAGTTAATTCCATAA
567	ADOR3B82530	NA	NA	NA	NA	NA	NA	NA	NA	NA	NA	NA	NA	NA	NA	NA	NA	NA	NA	NA	NA	NA	NA	NA	NA	NA	NA	NA	NA	NA	NA	NA	NA	NA	NA	NA	NA	NA	NA	NA	1	NA	NA	NA	NA	NA	NA	ATGGCACGAAACTGTGTTCATTCTAGTTACCAAATTGTACCAATTCTCAAAACTACCTTGATACTTCACGAAAGCGTATCCGAAGTTAGCGAAAAATTTCTAGCAAAGAAAAAAGGGAAAAAGGAGGAACGTATTCAAATACGTATGGAATACCTGCCACATGGAAAAGTTTGA
568	ADOR3B82536	NA	NA	NA	NA	NA	NA	NA	NA	NA	NA	NA	NA	NA	NA	NA	NA	NA	NA	NA	NA	NA	NA	NA	NA	NA	NA	NA	NA	NA	NA	NA	NA	NA	NA	NA	NA	NA	NA	NA	1	NA	NA	NA	NA	NA	NA	TGGGGGGCAGAGGGGCAGGTCGGCGAAGGATTCCGCGAAGCGGTCGAGGCGGGAGAAGGGAGGTGGAGGGGGAGCGGAGGAGCTACAGTTGGAAAATCCCGCGAAACACATGCGATTAACGTTGGAGAGTTTGAGCCAGGACGAAGCGTCGAACAGTAA
569	ADOR3B82542	NA	NA	NA	NA	NA	NA	NA	NA	NA	NA	NA	NA	NA	NA	NA	NA	NA	NA	NA	NA	NA	NA	NA	NA	NA	NA	NA	NA	NA	NA	NA	NA	NA	NA	NA	NA	NA	NA	NA	1	NA	NA	NA	NA	NA	NA	ATGAATGAACTTGATGATGATGATGATGATAATGATGATGATGATGATGATGATGATGATGATGATGATGATGATAATGATGATCATGATGATAATGATGATGATGATGATGATGATAATGATGATCATGATGATAATGATGATGATGATGATGATGATAATGATGATCATGATGATAATGATGATGATGATGATGATGATAATGATGATCATGATGATAATGATGATGATGATGATGATGATGATGATGATGATGATGATGATGATGATGATAATGATGATAATGATGATAATGATGATGATGATGAAATGATGATAGTGATGCTACTGCTGCTGCTGCTGCTGATGATGGTGATAGTAATGCTAATGACGATGACAATGACAATAACGACGACGACA…
570	ADOR3B90002	NA	NA	NA	NA	NA	NA	NA	NA	NA	NA	NA	NA	NA	NA	NA	NA	NA	NA	NA	NA	NA	NA	NA	NA	NA	NA	NA	NA	NA	NA	NA	NA	NA	NA	NA	NA	NA	NA	NA	1	NA	NA	NA	NA	NA	NA	ATGCTGAGTGTCTCAGCTGCGTCCAGTCGATTACTTTGGACGCTAAAATCAATTTTGTCATCGACACTGTCACCGTCACTGACACCGACACCGACACCGATAACAACTCCCACACCGTTATTGTCGCCGTCGCCGTCGTCGACGTCGTCGTCGACGTCCTCGCCGCCGCCGCCGTCGTCGTCGTCGTCGTCGTCGTCGTCGCCGTCGTCGTCGTCGTCGTCGTCGTCGACGTCGTCGTCGACGTCGTCGTCGCGGCGGCTGTTGTTAGTGTCATCTCTGTCATTGTTATTGAAATCACCATCGTCGTCGTGGTCTTCGTTATTACCATCATCATTGCCATCGTTGTTGCTGTTATTGTCATTGTTGTTAGTGTCACTATTATCAATTTTGTCGTTATCA…
571	ADOR3B90004	NA	NA	NA	NA	NA	NA	NA	NA	NA	NA	NA	NA	NA	NA	NA	NA	NA	NA	NA	NA	NA	NA	NA	NA	NA	NA	NA	NA	NA	NA	NA	NA	NA	NA	NA	NA	NA	NA	NA	1	NA	NA	NA	NA	NA	NA	ATGGTAGAAGCA
572	ADOR3B90006	NA	NA	NA	NA	NA	NA	NA	NA	NA	NA	NA	NA	NA	NA	NA	NA	NA	NA	NA	NA	NA	NA	NA	NA	NA	NA	NA	NA	NA	NA	NA	NA	NA	NA	NA	NA	NA	NA	NA	1	NA	NA	NA	NA	NA	NA	ATGTATGTNNNNNNNNNNNNNNNNNNNNNNNNNNNNNNNNNNNNNNNNNNNNNNNNNNNNNNNNNNNNNNNNNNNNNNNNNNNNNNNNNNNNNNNNNNNNNNNNNNNNNNNNNNNNNNNNNNNNNNNNNNNNNNNNNNNNNNNNNNNNNNNNNNNNNGAGAGAGAGAGAGAGAGAGAGAGAGAGAGAGAGAGAAGAAAAGAGATTAA
573	ADOR3B90011	NA	NA	NA	NA	NA	NA	NA	NA	NA	NA	NA	NA	NA	NA	NA	NA	NA	NA	NA	NA	NA	NA	NA	NA	NA	NA	NA	NA	NA	NA	NA	NA	NA	NA	NA	NA	NA	NA	NA	1	NA	NA	NA	NA	NA	NA	ATGGTGTATCTTTTAAGAGACGCAGAAATTCAATTACTTTTAATTTTTTTTTTTTTTTTTTTTTTTTTTTCTCTCCAACAAAAAAAAAAAATTTTTTTTTTTATTTTTTTTTTTTTTTTTTTTTTTTTTTCTCTCCAACAAAAAAAAAAAATTTTTTTTTTTATTTTTTTTTTTTTTTTTTTTTTTTTTTCTCTCCAACAAAAAAAAAAAATTTTTTTTTTTATTTTTTTTTTTTTTTTTTTTTTTTGCTCCCTAACACAAGTAAGAAAAGTTTAA
574	ADOR3B90015	NA	NA	NA	NA	NA	NA	NA	NA	NA	NA	NA	NA	NA	NA	NA	NA	NA	NA	NA	NA	NA	NA	NA	NA	NA	NA	NA	NA	NA	NA	NA	NA	NA	NA	NA	NA	NA	NA	NA	1	NA	NA	NA	NA	NA	NA	ATGAATCCTCTGATCGCG
575	ADOR3B90017	NA	NA	NA	NA	NA	NA	NA	NA	NA	NA	NA	NA	NA	NA	NA	NA	NA	NA	NA	NA	NA	NA	NA	NA	NA	NA	NA	NA	NA	NA	NA	NA	NA	NA	NA	NA	NA	NA	NA	2	NA	NA	NA	NA	NA	NA	ATGTTGATGCGTTGGAAGAGCAAGGACAAGAGCTCTAGCAAGAGCTCCTCCGCCGGTCCCAGTCTTGGCAAGAAGAAGCGTAAATTCGGCAGAGAAGCATTGGGAGGAGTTCCTCTTGATATGTCGAGCAATGTAATCCAACCAAATATTCGTGAAAATAATACTGATGGAACAGTAAAATTTGTAATCTTTTGA
576	ADOR3B90019	NA	NA	NA	NA	NA	NA	NA	NA	NA	NA	NA	NA	NA	NA	NA	NA	NA	NA	NA	NA	NA	NA	NA	NA	NA	NA	NA	NA	NA	NA	NA	NA	NA	NA	NA	NA	NA	NA	NA	1	NA	NA	NA	NA	NA	NA	ATGTTTACATTGTTTTTTTTTTTTTTTTTAAGCGATGTTAATATATCAAATTTTNNNNNNNNNNNNNNNNNNNNNNNNNNNNNNNNNNNNNNNNNNNNNNNNNNNNNNNNNNNNNNNNNNNNNNNNNNNNNNNNNNNNNNNNNNNNNNNNNNNNNNNNNNNNNNNNNNNNNNNNNNNNNNNNNNNNNNNNNNNNNNNNNNCCTTTGGTAA
577	ADOR3B90026	NA	NA	NA	NA	NA	NA	NA	NA	NA	NA	NA	NA	NA	NA	NA	NA	NA	NA	NA	NA	NA	NA	NA	NA	NA	NA	NA	NA	NA	NA	NA	NA	NA	NA	NA	NA	NA	NA	NA	1	NA	NA	NA	NA	NA	NA	CGGGCTCTTGGCATCGATGATTAA
578	ADOR3B90035	NA	NA	NA	NA	NA	NA	NA	NA	NA	NA	NA	NA	NA	NA	NA	NA	NA	NA	NA	NA	NA	NA	NA	NA	NA	NA	NA	NA	NA	NA	NA	NA	NA	NA	NA	NA	NA	NA	NA	1	NA	NA	NA	NA	NA	NA	ATGGCAAATATATGCGTGTTTTTTTTTTTTTTTTTTTTTTTTTTTTNNNNNNNNNNNNNNNNNNNNNNNNNNNNNNNNNNNNNNNNNNNNNNNNNNNNNNNNNNNNNNNNNNNNNNNNNNNNNNNNNNNNNNNNNNNNNNNNNNNNNNNNNNNNNNNNNNNNNNNNNNNNNNNNNNNNNNNNNNNNNNNNNNNNNNNNNNNNNNNNNNNNNNNNNNNNNNNNNNNNNNNNNNNNNNNNNNNNNNNNNNNNNNNNNNNNNNNNNNNNAGATAACCACGTGAAACGTTCGATTATTTATCTTCATTCGCGTTAA
579	ADOR3B90036	NA	NA	NA	NA	NA	NA	NA	NA	NA	NA	NA	NA	NA	NA	NA	NA	NA	NA	NA	NA	NA	NA	NA	NA	NA	NA	NA	NA	NA	NA	NA	NA	NA	NA	NA	NA	NA	NA	NA	1	NA	NA	NA	NA	NA	NA	ATGGCTCAGAATCGGTTGGAGGATCAAGATCGAGGATCAAAATTGTTGCCAACATTGTTGTTGGAAACATTGCGCACTCCTCCTCGAGGAGTCAGAGG
580	ADOR3B90044	NA	NA	NA	NA	NA	NA	NA	NA	NA	NA	NA	NA	NA	NA	NA	NA	NA	NA	NA	NA	NA	NA	NA	NA	NA	NA	NA	NA	NA	NA	NA	NA	NA	NA	NA	NA	NA	NA	NA	1	NA	NA	NA	NA	NA	NA	ATGTTATTTGGTGCAGCTTTAAAGTTGTACACAGCGTTCGCCGCGTTGGGATTAAG
581	ADOR3B90047	NA	NA	NA	NA	NA	NA	NA	NA	NA	NA	NA	NA	NA	NA	NA	NA	NA	NA	NA	NA	NA	NA	NA	NA	NA	NA	NA	NA	NA	NA	NA	NA	NA	NA	NA	NA	NA	NA	NA	1	NA	NA	NA	NA	NA	NA	ATGAATTTATTTATTACATATAAATG
582	ADOR3B90051	NA	NA	NA	NA	NA	NA	NA	NA	NA	NA	NA	NA	NA	NA	NA	NA	NA	NA	NA	NA	NA	NA	NA	NA	NA	NA	NA	NA	NA	NA	NA	NA	NA	NA	NA	NA	NA	NA	NA	1	NA	NA	NA	NA	NA	NA	ATGTTACTTGCCAATTTTTCTCCTTTTGTTTTCATCTTTTGTTTTTTTTTTTTTTTTTTTTTTTTTTTTNNNNNNNNNNNNNNNNNNNNNNNNNNNNNNNNNNNNNNNNNNNNNNNNNNNNNNNNNNNNNNNNNNNNNNNNNNNNNNNNNNNNNNNNNNNNNNNNNNNNNNNNNNNNNNNNNNNNNNNNNNNNNNNNNNNNNNNNNNNNNNNNNNNNNNNNNNNNNNNNNNNNNNNNNNNNNNNNNNNNNNNNNNNNNNNNNNNNNNNNNNNNNNNNNNNNNNNNNNNNNNNNNNNNNNNNNNNNNNNNNNNNNNNNNNNNNNNNNNNNNNNNNNNNNNNNNNNNCTTTTTTTTTTCTAA
583	ADOR3B90055	NA	NA	NA	NA	NA	NA	NA	NA	NA	NA	NA	NA	NA	NA	NA	NA	NA	NA	NA	NA	NA	NA	NA	NA	NA	NA	NA	NA	NA	NA	NA	NA	NA	NA	NA	NA	NA	NA	NA	1	NA	NA	NA	NA	NA	NA	ATGCCGGCAGCGAAATACACCGACTTCAACCCTTTTATTTTTTTATTCGCCCTCTTTCTCTCTCTCTCTCTCTCTCTCTCTCTCTCTNNNNNNNNNNNNNNNNNNNNNNNNNNNNNNNNNNNNNNNNNNNNNNNNNNNNNNNNNNNNNNNNNNNNNNNNNNNNNNNNNNNNNNNNNNNNNNNNNNNNNNNNNNNNNNNNNNNNNNNNNNNNNNNNNNNNNNNNNNNNNNNNNNNNNNNNNNNNNNNNNNNNNNNNNNNNNNNNNNNNNNNNNNNNNNNNNNNNNNNNNNNNNNNNNNNNNNNNNNNNNNNNNNNNNNNNNNNNNNNNNNNNNNNNNNNNNNNNNNNNNNNNNNNNNNNNNNNNNNNNNNNNNNNNNNNNNNNNNNNNNNNNNNNNNNNN…
584	ADOR3B90067	NA	NA	NA	NA	NA	NA	NA	NA	NA	NA	NA	NA	NA	NA	NA	NA	NA	NA	NA	NA	NA	NA	NA	NA	NA	NA	NA	NA	NA	NA	NA	NA	NA	NA	NA	NA	NA	NA	NA	1	NA	NA	NA	NA	NA	NA	ATGGACGTTCCACGCATCCTCCCCTCCCCCTTGTTCCGCTGNNNNNNNNNNNNNNNNNNNNNNNNNNNNNNNNNNNNNNNNNNNNNNNNNNNNNNNNNNNNNNNNNNNNNNNNNNNNNNNNNNNNNNNNNNNNNNNNNNNNNNNNNNNNNNNNNNNNNNNNNNNNNNNNNNNNNNNNNNNNNNNNNNNNNNNNNNNNNNNNNNNNNNNNNNNNNNNNNNNNNNNNNNNNNNNNNNNNNNNNNNNNNNNNNNNNNNNNNNNNNNNNNNNNNNNNNNNNNNNNNNNNNNNNNNNNNNTCCCCCTCTCCCTCTGCGCCATCCAACCCTCTTTCCCTTTTGCACGGCTGCACGCTTGTTTCTTGCCGTGCCACGCTGTCTAG
585	ADOR3B90071	NA	NA	NA	NA	NA	NA	NA	NA	NA	NA	NA	NA	NA	NA	NA	NA	NA	NA	NA	NA	NA	NA	NA	NA	NA	NA	NA	NA	NA	NA	NA	NA	NA	NA	NA	NA	NA	NA	NA	1	NA	NA	NA	NA	NA	NA	ATGTATTACGAGATCAGAAAAAATTATCTCACATTTTTATACGTAAAAAAAAAAAAAAGAAAGGAAAAAAAAATTTTTTTTCTTTTTTTTTATTTTTTTGTTTTTTTTTTTTTTTTTTTTTTTTTTTTTTTTTNNNNNNNNNNNNNNNNNNNNNNNNNNNNNNNNNNNNNNNNNNNNNNNNNNNNNNNNNNNNNNNNNNNNNNNNNNNNNNNNNNNNNNNNNNNNNNNNNNNNNNNNNNNNNNNNNNNNNNNNNNNNNNAAATGACTATCAATATAACAATCCAATATATTTCAAAACATAAATAA
586	ADOR3B90075	NA	NA	NA	NA	NA	NA	NA	NA	NA	NA	NA	NA	NA	NA	NA	NA	NA	NA	NA	NA	NA	NA	NA	NA	NA	NA	NA	NA	NA	NA	NA	NA	NA	NA	NA	NA	NA	NA	NA	1	NA	NA	NA	NA	NA	NA	AACCAGAGTTCTACAATTTATCTACATCTCATAATGGACCTGCAACGGGACAAACAAATTATACAATTCATGTACCGTGA
587	ADOR3B90084	NA	NA	NA	NA	NA	NA	NA	NA	NA	NA	NA	NA	NA	NA	NA	NA	NA	NA	NA	NA	NA	NA	NA	NA	NA	NA	NA	NA	NA	NA	NA	NA	NA	NA	NA	NA	NA	NA	NA	2	NA	NA	NA	NA	NA	NA	ATGTCTCGTGAATCGGACAGAGGGCGCATAAATACATGTACACAGATAGTAAAAGTGGGTGCACTGGGGCCCTCGGGACCGTTCGGCCGATACGGGCCCGTGGAAGGTGGGCCTGGTGGTGGTNNNNNNNNNNNNNNNNNNNNNNNNNNNNNNNNNNNNNNNNNNNNNNNNNNNNNNNNNNNNNNNNNNNNNNNNNNNNNNNNNNNNNNNNNNNNNNNNNNNNNNNNNNNNNNNNNNNNNNNNNNNNNNNNNNNNNNNNNNNNNNNNNNNNNNNNNNNNNNNNNNNNNNNNNNNNNNNNNNNNNNNNNNNNNNNNNNNNNNNNNNNNNNNNNNNNNNNNNNNNNNNNNNNNNNNNNNNNNNNNNNNNNNNNNNNNNNNNNNNNNNNNNNNNNNNNNNNN…
588	ADOR3B90086	NA	NA	NA	NA	NA	NA	NA	NA	NA	NA	NA	NA	NA	NA	NA	NA	NA	NA	NA	NA	NA	NA	NA	NA	NA	NA	NA	NA	NA	NA	NA	NA	NA	NA	NA	NA	NA	NA	NA	1	NA	NA	NA	NA	NA	NA	ATGATATTAATGGATTTAGATGGCATTGAAGTGATTCTTGGTTTAAAATTGATGTTAAATGAAAAGAG

## Sheet: Aflo specific genes
Order	3B ID	NCBI GeneID	NCBI Symbol	NCBI Description	interpro_ids	interpro_names	interpro_descriptions	PANTHER_ids	PANTHER_names	PIRSF_ids	PIRSF_names	PRINTS_ids	PRINTS_names	PRINTS_descriptions	Pfam_ids	Pfam_names	Pfam_descriptions	ProDom_ids	ProDom_descriptions	ProSitePatterns_ids	ProSitePatterns_names	ProSitePatterns_descriptions	ProSiteProfiles_ids	ProSiteProfiles_names	ProSiteProfiles_descriptions	SMART_ids	SMART_names	SUPERFAMILY_ids	SUPERFAMILY_names	TIGRFAM_ids	TIGRFAM_names	TIGRFAM_descriptions	KEGG_ids	KEGG_names	MetaCyc_ids	MetaCyc_names	Reactome_ids	Reactome_names	Bombus	Contaminant	Max_num_exons	GO_BP_ID	GO_BP_Name	GO_MF_ID	GO_MF_Name	GO_CC_ID	GO_CC_Name		Coding Sequence
1	AFLO3B62543	100863324	LOC100863324	tetra-peptide repeat homeobox protein 1-like	NA	NA	NA	NA	NA	NA	NA	NA	NA	NA	NA	NA	NA	NA	NA	NA	NA	NA	NA	NA	NA	NA	NA	NA	NA	NA	NA	NA	NA	NA	NA	NA	NA	NA	NA	NA	2	NA	NA	NA	NA	NA	NA	ATGCGCACCTTCGCAGCGGTCTCCCTCGTCGCGGCCTTCCTCTCGATCGCCTCGGCCGCCCCCTCCGGCCTTCTGGCGCCTGGGGCAGCGTTGGCGGGCCCGATCCTCGGCCCGGCCGCCCTCAGCGGCCCCGTGGCGGGCCCCGCCGCCCTCGCCGGACCCGCCGTCGGACCCGCTCGCCTCTCCGGAGCCGTGGACGGTGGCGCTGTCGTCACAGGAGCCGTTGCTGGCCCCTCCCTCGTCTCAGGCAGCGTTGCAGGCCACGCCGCACCCTGGCCGGCGGCACACTGGCCAGCCGCCCCTGCCCTTCCCTGGGGAGCTGTTCTGGCCGGACCCGCTGCACCTCCAGCGGCCCTGGCCGGCCCCATCACCGCCCCGGCATTGATCGCTGGCCCATCG…
2	AFLO3B62546	100863561	LOC100863561	uncharacterized LOC100863561	NA	NA	NA	NA	NA	NA	NA	NA	NA	NA	NA	NA	NA	NA	NA	NA	NA	NA	NA	NA	NA	NA	NA	NA	NA	NA	NA	NA	NA	NA	NA	NA	NA	NA	NA	NA	3	NA	NA	NA	NA	NA	NA	ATGAAATCCCTGTTAATCCTCTTCGCCATCGTTGCCGTTGTGGCGGCTTTCCCCGAACCAGAAAGGGAACGCCGAGGAGTCATCGCGGCCCCAGCCTTGACAGCGCTGCCTCTTGCACCCACTATTGCTCTCGCAGCCCCTAAAATCGCCCCTGCTATCGCTCTCGCACCCGCCCCTAAACTTCTCGCGGCGCCAGTTGTAGCCGCCCCAGTCCCGTGGAAAGCATGGTAA	ATGAAATCCCTGTTAATCCTCTTCGCCATCGTTGCCGTTGTGGCGGCTTTCCCCGAACCAGAAAGGGAACGCCGAGGAGTCATCGCGGCCCCAGCCTTGACAGCGCTGCCTCTTGCACCCACTATTGCTCTCGCAGCCCCTAAAATCGCCCCTGCTATCGCTCTCGCACCCGCCCCTAAACTTCTCGCGGCGCCAGCAGTTGTAGCCGCCCCAGTCCCGTGGAAAGCATGGTAA
3	AFLO3B60192	100869532	LOC100869532	putative glycine-rich cell wall structural protein 1	NA	NA	NA	NA	NA	NA	NA	NA	NA	NA	NA	NA	NA	NA	NA	NA	NA	NA	NA	NA	NA	NA	NA	NA	NA	NA	NA	NA	NA	NA	NA	NA	NA	NA	NA	NA	4	NA	NA	NA	NA	NA	NA	ATGGGCATCAAACACCTCAACATGAAGGTGTTCGCGATTACGATCCTCTTGGCGCTCGTAGCCACTTCCTATGCTGGTTACATAAGCAGCGGTTGGTCTGGTGGAGGTGGTGGTTGGAATGGAGGTGGCGGTGGCTGGTCCGGTGGAGGTGGTGGTGGCGGCTGGAAGTACGGTGGTGGTGGAGGTGGAGGCGGAGGTGGCGGCGGAAAAATCATCAAAGTGATCACTGTTAGCGGTGGAGGCGGTGGATGGCCTAGTGGAGGCGGTGGTGGATGGGCTGGTGGTGGTGGCGGATGGCCGAGTGGTGGCGGTGGTGGATGGAAAGGAGGATGGAGCGGCGGTGGTGGTGGATGGAGCGGCGGCGGTGGCGGAGGCGGCTGGTGGTAA
4	AFLO3B60859	100870369	LOC100870369	uncharacterized LOC100870369	NA	NA	NA	PTHR22979;PTHR22979:SF44	ZINC FINGER PROTEIN-RELATED;SUBFAMILY NOT NAMED	NA	NA	NA	NA	NA	NA	NA	NA	NA	NA	NA	NA	NA	NA	NA	NA	NA	NA	NA	NA	NA	NA	NA	NA	NA	NA	NA	NA	NA	NA	NA	5	NA	NA	NA	NA	NA	NA	ATGGAAAAATTCGTTATAATCTTGATGGCCGCCGTCCCCTGCCTGGCCGGGGAATTGGAATTGAGCGGTCACGGATTGGGTGATCATGGATTGACTTTGGGAGAAATAGCAGTGGGTCACGAGGGTGGAGATATTGGCTTAGAGGAAATAGGGGAGCACGAAATTGGGGAATATGGCGGGCATGGCGGACATTACGTGCCGATTGTGAAATCGATTGGTGTACCGGTTCCGAAGAAGGTTCCTATATTGATTCCAAAACTGGAGGTTGAATCCGTTCCACAGAATTATCCGGTTCCTGTAATCGTACCGAAGCCCGTTCCTTACCAGGTGGAGAAACAAGTGTTCACGAAGGTGGAGAAGAAGGTGCCCACGCCCATCGAGAAAATCATCCCGGTGAAA…
5	AFLO3B60929	100872476	LOC100872476	small proline-rich protein 2I-like	NA	NA	NA	NA	NA	NA	NA	PR00021	PRORICH	Small proline-rich protein signature	NA	NA	NA	NA	NA	NA	NA	NA	NA	NA	NA	NA	NA	NA	NA	NA	NA	NA	NA	NA	NA	NA	NA	NA	NA	NA	4	NA	NA	NA	NA	NA	NA	ATGTCGTGTTATCGCTCTTGCTGTTCTCCATGCTGCTCTCCACCATCCTGTCCTCCACCATCCTGTCCTCCGCCACCCTGTCCTCCACCACCCTGTCCTCCACCCTGTCCTCCACCCACTATCGTATGCAGACCACCCTGCCCCCCTCGTTGCCCCCCTCAACCAACTAAAACAACAGTTTACCTACGGCCTTGTACGCCTTGTCCACCCTGTTGCGCCATTCCTTGCCCACCAAAGGTCGTCGTTGCGTGTGCACCACCCCCACCCCCCTGTCCACCACCGCCTCCAAGCGTAACCTTCGTTTGTACCAAGAAGATAGTCCCCTGTATGCCGTGTCCACCGCCGACGCCACCCCCCTGTTCTCCTTGTCGTACGATTTGCATGTCGCATTCCTGTTAA
6	AFLO3B64355	105735349	LOC105735349	phosphopantothenoylcysteine decarboxylase subunit SIS2-like	NA	NA	NA	NA	NA	NA	NA	NA	NA	NA	NA	NA	NA	NA	NA	NA	NA	NA	NA	NA	NA	NA	NA	NA	NA	NA	NA	NA	NA	NA	NA	NA	NA	NA	NA	NA	3	NA	NA	NA	NA	NA	NA	ATGGGGACTGTTGGTGATGTTATTAGTCACATACATCATCTGATTCGCGATACAGGCCAAGGCCGGGTATGCGTCTGGTCTAGAAATTTCGATGTTCACGGCGAACGTTCTGGTAAACCTAAACAAAGAGCCATGGATGAAGATGAAGATGAAAACGACGATGAAGTAGAAGATGGAGTACAAGATGAAGATGAAGATGGAATACAAAATGAAAATGGAGATGATGTACAAAATGAAGATGAGGATAAAGTTCAAGATGAAGATGAATGTGAAGTACAAGATGAAGATGAAATACAAGACGAGAATGAAGTACAACATGAAGATGAAGTACAGGATTAA
7	AFLO3B64403	105735355	LOC105735355	uncharacterized LOC105735355	IPR029526	PGBD	PiggyBac transposable element-derived protein	NA	NA	NA	NA	NA	NA	NA	PF13843	DDE_Tnp_1_7	Transposase IS4	NA	NA	NA	NA	NA	NA	NA	NA	NA	NA	NA	NA	NA	NA	NA	NA	NA	NA	NA	NA	NA	Y	NA	2	NA	NA	NA	NA	NA	NA	ATGTCAAGACATTCGAGAGAGATTAATTTATTAGAGAAAATAAATAATATCGACGAAGATTGTTCGAAAGATGATTAAGAGTTTTCCGATATTGATAATGATATAGCAGAAAATAATTGTGACTTATTTGATAGCGATTCGGACGAAGAGAATATTTTGAATATACGAAGAGGACAAAAAAGAAAGAGATTCATAGTTAGTTCCGAAAGCGAAAATAAAGAAAATATTGAAACTGCTATAGACGGAAATGTTTGGGAAAAAATAAAAGGAGGAACACCGATTTATAATATTTTCAAGGAAATATCAGGACCGACAGGATACGCTAATAAAAATATCATAAAGGACGGAATTGAATCAGCATTTTCCTTGATTATTGATCATAACATGATTGAACGTATA…
8	AFLO3B65054	105735497	LOC105735497	uncharacterized LOC105735497	NA	NA	NA	NA	NA	NA	NA	NA	NA	NA	NA	NA	NA	NA	NA	NA	NA	NA	NA	NA	NA	NA	NA	NA	NA	NA	NA	NA	NA	NA	NA	NA	NA	NA	NA	NA	10	NA	NA	NA	NA	NA	NA	AAATTTATTCTATACTTGTTCTATCTCACTGTTCACATGGCGATAATGGAGATCGAGGCATTTGGAAATTTAGAAGCCACGATGGAAAATATCATAGATAAACGTAATTATCTCATATTGTTTCTACTTCGATTCAACAAATTGATCGAACGTGCGATCGTTATTGTAATAAAGAAAGGGTTGCTAAGGTTGCAAATTCGAATACGCCATTTCAATGATGGTAGCAATGGTCTCTGGTATTTGGCAGCTATTTTGAAACATACCTGGTACAGAATTGCCATTTCAGGACAAGTTAATGAATCATCGAAAGCTTATACTTTGCCATTTCGAGTTGGTGCATTTATCGATTATCAAGACGACTTTCAAAACTTCATTGTCACGTATGTGTACCAGTTTCCA…
9	AFLO3B65281	105735633	LOC105735633	probable polygalacturonase	IPR000743;IPR006626;IPR011050	Glyco_hydro_28;PbH1;Pectin_lyase_fold/virulence	Glycoside hydrolase, family 28;Parallel beta-helix repeat;Pectin lyase fold/virulence factor	PTHR31339;PTHR31339:SF30	FAMILY NOT NAMED;PECTIN LYASE-LIKE SUPERFAMILY PROTEIN	NA	NA	NA	NA	NA	PF00295	Glyco_hydro_28	Glycosyl hydrolases family 28	NA	NA	NA	NA	NA	NA	NA	NA	SM00710	pbh1	SSF51126	Pectin lyase-like	NA	NA	NA	NA	NA	NA	NA	NA	NA	NA	NA	2	GO:0005975	carbohydrate metabolic process	GO:0004650	polygalacturonase activity	NA	NA	ATGATTGCAATTGGATTTTTAATGACCAGTACTAATAACGTTACTGCTAAAAAAGTGACGAATAACAACGTAATTACCATAACAAAGCAAAACGTAAGGAAAAAAGATGCTACGACAACTATTCAAGCGGCAATAAATAAAGTGGCAGTATATGGTGGAGGAAAAGTAACAATAGCAGCTGGAACTTATCACGTAAAATACCTAAATTTAAGAAGCAACCTAAATTTGCACCTTTGCAACGGTGCAAGAATAATCTTCTCAAACAAATTTGCCACTTTTCCAGCAATAAAAACGAGGTATGAAGGCACGGAAACTAAAATGCGCCATCCCGATATTTATGGTAACAATGTTCATCATGTTCAAATCACTGGTAACGGTACTTTAGATGGTAATGGGCAA…
10	AFLO3B65876	105735791	LOC105735791	cuticle protein 70, isoforms A and B	NA	NA	NA	NA	NA	NA	NA	NA	NA	NA	NA	NA	NA	NA	NA	NA	NA	NA	NA	NA	NA	NA	NA	NA	NA	NA	NA	NA	NA	NA	NA	NA	NA	NA	NA	NA	2	NA	NA	NA	NA	NA	NA	ATGATCAGGACAGTGATTTTTCAGTGCCTAGTTCTCCTCGTGGCGGCCGTCGCCTCAGCCGGACTGCTCCCTGCCGCCCCCTTGGCCGTGGCCCCGGCGGTGGCCGCTGTTCCAGCGCCCATCGTCACTGCTAGAAGCAGCCAAGTCGTAGCCAGGAATTACAACACGTTGGCCGCTGCGCCGCTCGCGGCCGCTCTGCCCGCCGCCGTCGCCGCACCATTGCCGCCCGCTTACCCGCCCCTCGCCGTCGCCGCGGCTCCCCTTCACGCGGCACCGCTCCCATACGCAGCGCTCAACTATCCCGCTGTTGCCATATAA
11	AFLO3B65879	105735803	LOC105735803	cuticle protein 38-like	NA	NA	NA	NA	NA	NA	NA	NA	NA	NA	NA	NA	NA	NA	NA	NA	NA	NA	NA	NA	NA	NA	NA	NA	NA	NA	NA	NA	NA	NA	NA	NA	NA	NA	NA	NA	1	NA	NA	NA	NA	NA	NA	ATGTACAAATTCGTCGCTCTGTTCGCCCTGTTCGCCTGCGCCCTGGCCGCCCCGGCACCGGAACCAGCACCAGGCTTCTTGGCACCGGCCGTGCACGCCGCACCCGTGGTCGCCGCTGCCCCGGTCGCGGTGGCCCACACCCTCCCGGTCGCCACCAGCTACGCCAACACCTACAAAGTATCCGTGAAGAGCCCGCTCGTCGCAGCAGCTCCCTACATCGCTGCCCCCGTGGCCACCGCAGCCGTCGTCAAGACAGCCGCGCCTCTCGTCGCCGCTGCACCAGCCGCGGCCGTCTACGCTCACGCTCCGGTCGTCGCCACGTACTGA
12	AFLO3B66003	105735841	LOC105735841	probable beta-glucosidase I	IPR001764;IPR001996;IPR002772;IPR017853;IPR018113;IPR019800	Glyco_hydro_3_N;PTS_IIB_1;Glyco_hydro_3_C;Glycoside_hydrolase_SF;PTrfase_EIIB_Cys;Glyco_hydro_3_AS	Glycoside hydrolase, family 3, N-terminal;Phosphotransferase system, IIB component, type 1;Glycoside hydrolase family 3 C-terminal domain;Glycoside hydrolase superfamily;Phosphotransferase system EIIB, cysteine phosphorylation site;Glycoside hydrolase, family 3, active site	PTHR30620;PTHR30620:SF68	PERIPLASMIC BETA-GLUCOSIDASE-RELATED;PERIPLASMIC BETA-GLUCOSIDASE	NA	NA	NA	NA	NA	PF00367;PF00933;PF01915	PTS_EIIB;Glyco_hydro_3;Glyco_hydro_3_C	phosphotransferase system, EIIB;Glycosyl hydrolase family 3 N terminal domain;Glycosyl hydrolase family 3 C-terminal domain	NA	NA	PS00775	GLYCOSYL_HYDROL_F3	Glycosyl hydrolases family 3 active site.	NA	NA	NA	NA	NA	SSF51445;SSF52279;SSF55604	(Trans)glycosidases;Beta-D-glucan exohydrolase, C-terminal domain;Glucose permease domain IIB	NA	NA	NA	NA	NA	NA	NA	NA	NA	NA	NA	4	GO:0005975 GO:0009401	carbohydrate metabolic process;phosphoenolpyruvate-dependent sugar phosphotransferase system	GO:0004553 GO:0008982	hydrolase activity, hydrolyzing O-glycosyl compounds;protein-N(PI)-phosphohistidine-sugar phosphotransferase activity	NA	NA	ATGGTTAACGGCCTACAAGAAAATTTAAAAAATAAAAAAGGCCAGGCTGCTTGCGTTAAGCACTATGCTGCTTATGGTGCAGTTGAAGGTGGTAAAGAATATAACTCAGTAGATATGTCGATAAGCAATCTGTTTCAGAACTATTTACCACCTTATAAAGCGGCTGTTGCTGCTGGCAGCGAAATGGTGATGACATCTTTAACAACACTTAACGGTGTGCCAGCCACTGCTAGTAAAGCACTTTTATCTACAATTTTGCGCCAAAAATGGGGCTTTGATGGTGTAATTATTTCAGATTATGCTTCGATTTTTGAACTGATTAAGCACGGATTTGCAGCAAATGAGATTCAGGCTAGTGAAGAAGCTTTCAACGCTAGCGTTGATATTGATATGAAATCG…
13	AFLO3B66091	105735865	LOC105735865	integumentary mucin C.1	NA	NA	NA	NA	NA	NA	NA	NA	NA	NA	NA	NA	NA	NA	NA	NA	NA	NA	NA	NA	NA	NA	NA	NA	NA	NA	NA	NA	NA	NA	NA	NA	NA	NA	NA	NA	1	NA	NA	NA	NA	NA	NA	ATGGATGAGAATATGACGACAACCACAACGACGACGATGACGACAATGATGACAACGACGACGACGACGGCGACGACGACGACGACGACGACGACG
14	AFLO3B66913	105736056	LOC105736056	glutamic acid-rich protein-like	NA	NA	NA	NA	NA	NA	NA	NA	NA	NA	NA	NA	NA	NA	NA	NA	NA	NA	NA	NA	NA	NA	NA	NA	NA	NA	NA	NA	NA	NA	NA	NA	NA	NA	NA	NA	3	NA	NA	NA	NA	NA	NA	ATGGCTGAAGTACAGGATGATGATGATGTTGAAGAACGGGATCATGATGATGATGAAGTACAAGATGATGATGATGATAAAGGACAAGATAATGAAGATGATAGGGAAGTACAAGGTGAAAAGGAGGATAAGGACAAGAAGATGATGATGATTTTAAAGTACTACATGAAATACAAGGTGGATGAAGTACAAGATAATGAAGACGATAGGGAAGTTCAAGGCGAAAAGGAGGATGAAGTAGAAGAAGATGATGATGTTGAAGTTCAAGATGATGATGATTTTGAAGTACTAGTTGAAAACGAGTATGAAGTACAAGAAGATGATGATAATGAAATTCAAGATAATGAAAATAATAGTGAAGTACTAGTTGAAAACGAGGATGAAGTACAATATAATGAT…
15	AFLO3B66956	105736063	LOC105736063	pheromone-processing carboxypeptidase KEX1-like	NA	NA	NA	NA	NA	NA	NA	NA	NA	NA	NA	NA	NA	NA	NA	NA	NA	NA	NA	NA	NA	NA	NA	NA	NA	NA	NA	NA	NA	NA	NA	NA	NA	NA	NA	NA	2	NA	NA	NA	NA	NA	NA	AATGAAGTACAAGATGATATTGAGGATGATGAAATACAAGATGATGATGATGAGGATGATGAAGTACAAGATGGTAATGATGATGAACAAAAAGGTGATGATGATAAGGGTAAAATACAAGATGATGACGATGATGAAGTACGAGATGATTGTGAGAATGATGAGGTAAAAGATAATGGTGAGGATGATGAAGTACAATATGATGATAAACAAGATGAGGATGAGGTACAAGATGATGATGATGATGAAGTACAAGATGATGTTATACAAAATAGTTATGTTGGGGATGAAATACAGTATGATGAGGATAAAGATAATGAAGTATAA
16	AFLO3B68417	105736431	LOC105736431	nucleophosmin-like	NA	NA	NA	NA	NA	NA	NA	NA	NA	NA	NA	NA	NA	NA	NA	NA	NA	NA	NA	NA	NA	NA	NA	NA	NA	NA	NA	NA	NA	NA	NA	NA	NA	NA	NA	NA	1	NA	NA	NA	NA	NA	NA	GACAACGACGATGACGATGATAGTGATAGGACGAGGAAACGAGCAAAAAAGAAAAAAAAAGAAATGAAGAATAGAGATACAAATGATGAGAATTATAAGGATATTAATAAAGATGACTGTAAGGATATTTGA
17	AFLO3B68470	105736493	LOC105736493	prostatic spermine-binding protein-like	NA	NA	NA	NA	NA	NA	NA	NA	NA	NA	NA	NA	NA	NA	NA	NA	NA	NA	NA	NA	NA	NA	NA	NA	NA	NA	NA	NA	NA	NA	NA	NA	NA	NA	NA	NA	4	NA	NA	NA	NA	NA	NA	ATGAAGTACCAGATGAGAATAAAGTATCAAATGAGAATGAAGTACAAGATGAGGATAAAGTATAAGTGTAGTACAAGTGAAGATGAAGTGCAAGATGTAAATGAAGTATCAGATGAGAATGAAATACAAAATGAGGATGAAGTACAACATGAGGATGAGGATAATGAGAAAGAAGTTGAAAATGAAGATGTAGTAAAAGATGAGGATGAAGTTGAAGATGAAGATGAGGATGAAGTTCAAGATGCCGATGAAGTACAAAAAGAAGATGAAGTACAATGTAAGAATGAAATACAAGATAAAGATGAGGATGAAGTACAAGATGAAGATGAAGATGAAGTAGAAAAAGAGGATGAAGTACAAGATGAAAATGAAGCACTAGATGAAAATAAGAAAGAAGTA…
18	AFLO3B68830	105736572	LOC105736572	uncharacterized LOC105736572	NA	NA	NA	NA	NA	NA	NA	NA	NA	NA	NA	NA	NA	NA	NA	NA	NA	NA	NA	NA	NA	NA	NA	NA	NA	NA	NA	NA	NA	NA	NA	NA	NA	NA	NA	NA	3	NA	NA	NA	NA	NA	NA	ATGGTACAAAAATGTCGACAGAATGCAACAATTGAAGAAGAAATAATTAAAGACTACAACGAAAATTGTAATAATTTACGTATGATTGCTAAGATAAAAATTCAGGAAGAGAATAGAAGAACATATATTGGAGATCTATTTATAAAACGAATTCAGCTTAGACCAAAACTTAAGATAAAACAAAAATATTTAGAACGGTATCAAGTAACGAAAGTGAGGAGAGGCGAACGCTATGACGTCAGAGAGAAGATGAAGGACTATATGAAAGCGTGTGTGTGTGTAATGAAGAGAATGATTAGAGATCTTCGAGAGCGAAGACTTTGTAGAAATAAACGAGTGTAG
19	AFLO3B69284	105736690	LOC105736690	uncharacterized LOC105736690	NA	NA	NA	NA	NA	NA	NA	NA	NA	NA	NA	NA	NA	NA	NA	NA	NA	NA	NA	NA	NA	NA	NA	NA	NA	NA	NA	NA	NA	NA	NA	NA	NA	NA	NA	NA	5	NA	NA	NA	NA	NA	NA	ATGGAGATCGGTAATGGGGAAGAATCTGTAGAAGGAGGAATATTGAAAGAAGAGGAATTGGACAAGGAAAAGGAAAGTATGGAGATTGGTAATGGGGAAGAATCTGTAGAAGGAGGAATATTGAAAGAAGAGGAATTGGACAAGAAAAAGGAAAGTATGGAGGTTGGTAATGGAGGAGAATCTGTAGAAGGAGGAATATTGAAAGAAGAGGAGGTTGGTAATGGAGGAGAATCTGTAGAAGGAGGGACATTAAAGGAAAAGGAAAATGTGAAGATTTGTGATGGAGGAGAAACTGTGGAAGAAGGAACGTTGAAGAAAGAGGAATTGGAGAAGGAAAAGGAAAATGTGGAAATTTGTGGTGAAGAAGAATCTGTAGAAGGAGGAATGTTAAAGAAAAAT…
20	AFLO3B69833	105736799	LOC105736799	prostatic spermine-binding protein-like	NA	NA	NA	NA	NA	NA	NA	NA	NA	NA	NA	NA	NA	NA	NA	NA	NA	NA	NA	NA	NA	NA	NA	NA	NA	NA	NA	NA	NA	NA	NA	NA	NA	NA	NA	NA	1	NA	NA	NA	NA	NA	NA	ATGGAAGTACAGGATGATGATGATGAAGTACAAAATAATGATGATGACGATAGTGAAATACAAGATTATATTGGTGATGACGAAGTACAAGATGATAATGATGATGATAACGAAGTACAAGATGATAATGATGATGATAATGAAATACAAGATGTAATTAAGGATGAATTACGAGATGATGATGGCGATGATGAAGTACAAGGTGATAACGAATGTGATGAAATCCAAAATGAAAATGATGATGATAATAAAATACAAAATGATGACAATTATGATGAAGTGCAAAGTGGAAATGAATGTAATGAAGTACAAGATGAATATGAGGATGAAGTACAAGATGATGACGATAATGATGAAGTACAAAATGAGGCTGATGATGAAGTACAAGGTAATGCTGAT…
21	AFLO3B70453	105736981	LOC105736981	uncharacterized LOC105736981	NA	NA	NA	PTHR34410;PTHR34410:SF3	FAMILY NOT NAMED;SUBFAMILY NOT NAMED	NA	NA	NA	NA	NA	NA	NA	NA	NA	NA	NA	NA	NA	NA	NA	NA	NA	NA	NA	NA	NA	NA	NA	NA	NA	NA	NA	NA	NA	Y	Y	2	NA	NA	NA	NA	NA	NA	ATGTGTTCTTGGATCGTCGCAAGACGGACAGAAGCGAAAGCATTTGCCAAAAATGTTTTCATTAATCAAGAACGAAAGTTAGAGGTTCGAAGGCGATCAGATACCGCCCTAGTTCTAACCATAAACGATGCCAGCCAGCGATCCGCCGAAGTTCCTCCGATGACTCGGCGGCAGCTTCCGGGAAACCAAGCTTTTGGTTCCGGGGGAAGTATGGTTGCAAAGCTGAAACTTAAAGGAATTGACGGAAGGGCACCACCAGGAGTGGAGCCTGCGGCTTAA
22	AFLO3B70698	105737095	LOC105737095	uncharacterized protein DDB_G0290685-like	NA	NA	NA	NA	NA	NA	NA	NA	NA	NA	NA	NA	NA	NA	NA	NA	NA	NA	NA	NA	NA	NA	NA	NA	NA	NA	NA	NA	NA	NA	NA	NA	NA	NA	NA	NA	3	NA	NA	NA	NA	NA	NA	ATGCAAGAAGAAAATGAGGATGAATTACCAGAGAAGGATGAACAACAAGATGAAGTACAAGATAAAGATGAGGATGAAGTACAGATTGAGTATGAACTACAGGTACAAGATGAAAACGAAGATGAAGTACAAGATGGTGATGTTGTTGTAGTACAAGATAATGATAATGATAATGAAGTATTAGGTGAAAACGAGAATGAAGTACAATATGGTGATGATGTTGAAGTACAAGATAATGATGATGATAGTGAAGCGCTAGATGAAAACGGGGATGAAGTACAAGATGGTGATGATGTTGAAGTACATGATGGTGATAACTTTGGAGTACTAAATAATGACGGTGATAGTAAATTACTAGGTGAAAACGAGAACGAAGAACAAGATAATGATGATGATAGT…
23	AFLO3B70701	105737096	LOC105737096	uncharacterized LOC105737096	IPR004628;IPR013022	Man_deHydtase;Xyl_isomerase-like_TIM-brl	Mannonate dehydratase;Xylose isomerase-like, TIM barrel domain	PTHR30387;PTHR30387:SF3	MANNONATE DEHYDRATASE;MANNONATE DEHYDRATASE	NA	NA	NA	NA	NA	PF03786	UxuA	D-mannonate dehydratase (UxuA)	NA	NA	NA	NA	NA	NA	NA	NA	NA	NA	SSF51658	Xylose isomerase-like	NA	NA	NA	00040+4.2.1.8	Pentose and glucuronate interconversions	PWY-7242	D-fructuronate degradation	NA	NA	NA	Y	2	GO:0006064	glucuronate catabolic process	GO:0008927	mannonate dehydratase activity	NA	NA	ATGGGATTTCGCTGGTACGGCGATAATAACGATTCCATCACCCTATCAGATATTCGGCAGATTCCTGGCGTTTCTCAAGTTGTTGGTACTCTGTTTGACATACCAGCCGGCGAGGTTTGGCCGAAGGACCAAATCAAACACCTAAAAGATGAGGTCGAAGCAGCTGGCTTAAAGCTTGAAGTGATTGAATCTGTTAACATTCACGATGATATCAAAATTGGTTATTTGTTACAACTTCATGCCTGTCTTCGATTGGTTAGAACTGACTTACATTATCTTTTACCTGATGGTTCAACGGCAATGGCTTTTGAGCAAAAATACCTTACCGATGATCCGCAAAGTATTGCGGATGCAATGCAAAAAAATTCAAACGGTTATGTCCAAGCTGGATGGGAACCT…
24	AFLO3B70713	105737101	LOC105737101	uncharacterized LOC105737101	IPR003953;IPR023753;IPR027477	FAD-binding_2;FAD/NAD-binding_dom;Succ_DH/fumarate_Rdtase_cat	FAD-dependent oxidoreductase 2, FAD binding domain;FAD/NAD(P)-binding domain;Succinate dehydrogenase/fumarate reductase flavoprotein, catalytic domain	PTHR43400;PTHR43400:SF3	FAMILY NOT NAMED;SUBFAMILY NOT NAMED	NA	NA	NA	NA	NA	PF00890	FAD_binding_2	FAD binding domain	NA	NA	NA	NA	NA	NA	NA	NA	NA	NA	SSF51905;SSF56425	FAD/NAD(P)-binding domain;Succinate dehydrogenase/fumarate reductase flavoprotein, catalytic domain	NA	NA	NA	NA	NA	NA	NA	R-HSA-611105;R-HSA-71403	Respiratory electron transport;Citric acid cycle (TCA cycle)	NA	NA	3	GO:0055114	oxidation-reduction process	GO:0016491	oxidoreductase activity	NA	NA	ATGACTAAAGCAATTTTGGCGAAGTCGGCTTCAACGATAGATTGGATGAGGGAAAATGGGCTAGAAACTGAGCTTAAGGTTGTGGACAACTTTATTAAAGCGGGCGGCACATTATTAACAGAAACAACTGGTAACAAAATTATTCAAGAAAACGGTGAAGTCGTTGGGATAGAAGTCACTATTAAAGGTGAGAAAAAGGTATTAGCGACGAAAGCAATAATTTTAGCTGATGGCGGATTTGTCGGTAATCAAGCCGAACTTGCTAAGTCTTGTTCAATCAATCCGGCTGACCTTTATTCAATGGGGGAGAGAAAGGCAACTGGAGATGGCCTGAAAATGCTTAAAGAAGCAGGTGGTGTGAATAATTATAAGCGGATTTTTGAAAATCATGCGGCGACT…
25	AFLO3B70723	105737113	LOC105737113	uncharacterized LOC105737113	IPR020846	MFS_dom	Major facilitator superfamily domain	PTHR43045;PTHR43045:SF2	FAMILY NOT NAMED;INNER MEMBRANE METABOLITE TRANSPORT PROTEIN YDFJ-RELATED	NA	NA	NA	NA	NA	NA	NA	NA	NA	NA	NA	NA	NA	PS50850	MFS	Major facilitator superfamily (MFS) profile.	NA	NA	SSF103473	MFS general substrate transporter	NA	NA	NA	NA	NA	NA	NA	NA	NA	NA	NA	2	NA	NA	NA	NA	NA	NA	ATGATTGCTGCCATTTTAATTCGACTTTTTATTAAAGAGAGTCCAGTAATGGCACAAAAAAAGAAAGAATTGGCTCAATTACGCGAAGAATTAGCAGAACAAGCAGAAAAAGACACAACTGGTGGGTTAAGATTTGGTCAGGCCGGTAACAGTGGTCTAATGCAAACATATTTAGCAGCTTTTCTTGTCACTTATCTTTCTGTTGCGCGAACTGTTCCAACTGATGCCAATATGATTGCATCAATCATTTCGTTTTTCACTATTCCTTTTGTCGGTTGGTTAGGAGATAAGTTTGGTAGAAGAACGATGTACCTAATTTTGTCGGGCGCGATGGCAATATTTGCTATCCCAATGATGCTATTAATTAGTACTAGAAACACTCTGTTAATTACAATCGCC…
26	AFLO3B70793	105737161	LOC105737161	uncharacterized LOC105737161	IPR001127;IPR011055	PTS_EIIA_1_perm;Dup_hybrid_motif	Phosphotransferase system, sugar-specific permease EIIA type 1;Duplicated hybrid motif	PTHR30175;PTHR30175:SF11	INVERTASE-RELATED;PTS SYSTEM BETA-GLUCOSIDE-SPECIFIC EIIBCA COMPONENT	NA	NA	NA	NA	NA	PF00358	PTS_EIIA_1	phosphoenolpyruvate-dependent sugar phosphotransferase system, EIIA 1	NA	NA	PS00371	PTS_EIIA_TYPE_1_HIS	PTS EIIA domains phosphorylation site signature 1.	PS51093	PTS_EIIA_TYPE_1	PTS_EIIA type-1 domain profile.	NA	NA	SSF51261	Duplicated hybrid motif	TIGR00830	PTBA	PTS system, glucose subfamily, IIA component	NA	NA	NA	NA	NA	NA	Y	NA	1	GO:0009401	phosphoenolpyruvate-dependent sugar phosphotransferase system	NA	NA	NA	NA	CACCTATTAGTGGAGTCTTTACTGAACTTGAGCGTGTTTCTGATCCTGTTTTTGCTCAAAAATTAATGGGTGATGGTTTTGCAATAAAGCCGCAGCCAGATGAAAGCGTTGTTTATTCGCCAGTCGAAGCTAAAGTAGTTTCACTCCCTGAATCTAAACATGCGGTTGGGCTCGTAACCGATGACGGTGATGAGGTACTGCTTCATATTGGAATTGATACGGTTAATTTGAACGGTAAAGGATTTACAGCATTAGTTAAGCTGGGCGACAAGGTAAACAAGGGCCAGGAACTGATTGAACTCAACCGGCAATTTTTAACTGCAAAGCAGGCGGATTTGACCACTATTGTTGTTTTAACCAATTAA
27	AFLO3B70861	105737209	LOC105737209	sialidase-like	NA	NA	NA	NA	NA	NA	NA	NA	NA	NA	NA	NA	NA	NA	NA	NA	NA	NA	NA	NA	NA	NA	NA	NA	NA	NA	NA	NA	NA	NA	NA	NA	NA	NA	NA	NA	3	NA	NA	NA	NA	NA	NA	ATGCCTGGAACTCCTGACACGCCTGGAACTTCTGACACGTCTGGAACTCCTGAAACAGCTAGTACTCCTGGCACTCCATCTGAAACAGTTGGAACATCTGGCACGCCTGGTACGACAGGAACACATAATCCATCTGGCACTGCTGGAACGCCTGAAAGACCAGATTCATCAAGTACAAATGAAACTTCTGATTCTTCTCAATCCATTGGCACTACTGCACTTAAATTAACAACCACTCCAACTCCTGGTAATACCGGTACAGATAGCAATAAGGATACACCAAACTCCTTAGCGACACAAAGCACGCATGGATTAAATACCACTGCAACAGTAACTCGTACACCAAACACGCCTGGGGAAATTGAAACAACAAGCACACATAGTACACTAACAACGACT…
28	AFLO3B61722	105737371	LOC105737371	prostatic spermine-binding protein-like	NA	NA	NA	NA	NA	NA	NA	NA	NA	NA	NA	NA	NA	NA	NA	NA	NA	NA	NA	NA	NA	NA	NA	NA	NA	NA	NA	NA	NA	NA	NA	NA	NA	NA	NA	NA	2	NA	NA	NA	NA	NA	NA	ATGGAATCAAGACGAGTATCGCCTGTTCAGTCCCCGCTGCTGAAGCTGGATGAAGGCCGAAGTCCGCTGTCCTTGATCTCGAGTCCTCCCAAAGAAGTACAAGATGTTGATGATAATGGTGATGTACAAGATGAATACAAGGACAAAATACAAGATTATGATGACAAAGATGTACAAGATGAATGTGCGATTAAAGTACGGGATGATAATGAGGATGATGAAGTACAAGATACTGATGAAATACAAGATGTTGATGATCATGGTGATGTACAAGATAAATATAAGGACGAAGTACAAAATAAATTTGAGGGTAAAGTACAAGATGATGATGATGATGAAGTACGAGATGATGAATATGAGGAGGAAGTTCATGATGACGATGATGCTGAAATAAAAGAT…
29	AFLO3B61723	105737372	LOC105737372	phosphopantothenoylcysteine decarboxylase subunit VHS3-like	NA	NA	NA	NA	NA	NA	NA	NA	NA	NA	NA	NA	NA	NA	NA	NA	NA	NA	NA	NA	NA	NA	NA	NA	NA	NA	NA	NA	NA	NA	NA	NA	NA	NA	NA	NA	2	NA	NA	NA	NA	NA	NA	ATGAAGAATGAAGATGATGAAGTACAAGATGATGGGGATAATAAAGAACAAGATAATGATGATGATGAAGTACACGATTGTGATGATGGTGATGATGAAGAACAAATTTATGATGATTATGTAGTACACGATTGTGATGATGGTGATGATGAAGAACAAGTTTATGGTGACGAAAATGAGGATGAAGTACAAGATGATGATGATGAAGTATATGATATTGATGATAATATACAAGATGAATGTAAGGATGAAATACAAGATGATGATGGAAAACAAGATCAGGATGAAATACAAGATGAAGATAAGGCTAGAATATAA
30	AFLO3B61778	105737393	LOC105737393	carbamate kinase-like	IPR001048;IPR003964	Asp/Glu/Uridylate_kinase;Carb_kinase	Aspartate/glutamate/uridylate kinase;Carbamate kinase	PTHR30409;PTHR30409:SF3	CARBAMATE KINASE;CARBAMATE KINASE-LIKE PROTEIN YAHI-RELATED	NA	NA	PR01469	CARBMTKINASE	Bacterial carbamate kinase signature	PF00696	AA_kinase	Amino acid kinase family	NA	NA	NA	NA	NA	NA	NA	NA	NA	NA	SSF53633	Carbamate kinase-like	NA	NA	NA	00220+2.7.2.2;00230+2.7.2.2;00910+2.7.2.2	Arginine biosynthesis;Purine metabolism;Nitrogen metabolism	NA	NA	NA	NA	NA	NA	1	GO:0006525	arginine metabolic process	GO:0008804	carbamate kinase activity	NA	NA	ATGGCTACTAGTGTAATCGCCCTAGGTGGGAATGCAATTCTAGAGAAAGATCCAACCGATATTGGGCAAAAAGAAACGGTTAATAGGGCAGCAAGATATATTGTTGAATATATAAAGGCTGGAAATAAAGTGGCAATTTGTCACGGTAATGGTCCGCAAGTGGGTAATTTGTTGTTGCAACAGAATGCCGCTAATTCTAAGAAAAATCCTGCTTTTAGACTTGATACCTGTGGGGCAATGACAGAGGGTAGCATTGGTTATTGGATTCAACAAGGGCTAGATAATGCTTCTAAAGATCTTGGTCAAAATATCAAATCTCTTACGGTTATTACCCAATCTGAAGTTGATAAAAATGATCCATCTTTCAGGTCTCCAA
31	AFLO3B61836	105737406	LOC105737406	probable inactive protein kinase DDB_G0270444	NA	NA	NA	NA	NA	NA	NA	NA	NA	NA	NA	NA	NA	NA	NA	NA	NA	NA	NA	NA	NA	NA	NA	NA	NA	NA	NA	NA	NA	NA	NA	NA	NA	NA	NA	NA	3	NA	NA	NA	NA	NA	NA	ATGATGAAAATGATGATGATGTACATGATAATGAAGATGATGAAGTACAAGGTGATGATGATGATGATGATGATGAAGTACATGATGATGATAGTAGAAAAAGTTGAAGTAGAAATAGAAGATGAAGTAGAAGTTGAAGATAAAGTAACAGTAGAAGATGCTATAAAAAGAGAAGATGTAGTAGAAATAGAAGATGATGTAGAATTTGAAGTAAAAGATAATGTAACAGTAAAAGATGAAAAAGAAGTAGAAGATGATGTAGAAGTTAACGTAGCAGATAAAGTAAAAGTAAAAGATGAAGAAGTTGAAATAGTAATAGGAAATGTAATAGAAGTAAAAGGTGAAGTAGAAGTAGAAGATAAAGTAACAGTAGAAAATGAAGTAAAAGTAGAAGATGAA…
32	AFLO3B61837	105737407	LOC105737407	probable inactive protein kinase DDB_G0270444	NA	NA	NA	NA	NA	NA	NA	NA	NA	NA	NA	NA	NA	NA	NA	NA	NA	NA	NA	NA	NA	NA	NA	NA	NA	NA	NA	NA	NA	NA	NA	NA	NA	NA	NA	NA	6	NA	NA	NA	NA	NA	NA	ATGTGTTACACTCAAGCTGAGAAGACAAAATTTGCAACTATGACAGCAGAAATGTTGAAATTAGAAAAAGAAAAAATAGTAGAAGATGAAGGAGAAGATGAAGATGTAATAGAAGATGAACTAGAAGAAATGGTAGAAGATGAAGTGGACGATGAAGTTGAAGATGAAGTGGAAGATGAAGTTGAAGATGAAGTGGAAGATGAAGTGGATGATGAAGTGGTAGATGAAGTAAAAGTAGAAGATGAAGTAGAAAATGAAGCGAAAGATGTGGAAGATGAAGTGGAAGGTGAAGTAGAAGAAGAAGTTGAAATAAAAGTAGAAGATGAAGTAGAATATGAACTAAAAATAGAAGATAAAGTAGAAGATAAAACAGAAGATGAAGTAGAAGTACAAGATAAT…
33	AFLO3B80034	NA	NA	NA	IPR000064;IPR008258;IPR013491;IPR023346	NLP_P60_dom;Transglycosylase_SLT_dom_1;Caudovirus_tape_meas_N;Lysozyme-like_dom	Endopeptidase, NLPC/P60 domain;Transglycosylase SLT domain 1;Caudovirus, tape measure, N-terminal;Lysozyme-like domain	NA	NA	NA	NA	NA	NA	NA	PF00877;PF01464	NLPC_P60;SLT	NlpC/P60 family;Transglycosylase SLT domain	NA	NA	NA	NA	NA	NA	NA	NA	NA	NA	SSF53955;SSF54001	Lysozyme-like;Cysteine proteinases	TIGR02675	tape_meas_nterm	tape measure domain	NA	NA	NA	NA	NA	NA	NA	NA	7	NA	NA	NA	NA	NA	NA	ATGCATGCTCCCAACGGCTTGCCTAGTGAGATTAATCATGTTAGTGCCGTCACAGCGTCCTATATCCAACGCTTAGAGTCAGAAGGCAAGACTTACCAAGCTAATCAAGAGCGAGTTAAAGGCTATCAATCTGCTATTTCTGAGTTAACAAATAAAGAAAAGGGACTAGAGAGTCAATTAGCTAAAATTGCTGAAACTTCCGGTACCGCAAGCTCAGCATATCAGCGTCAGCAGGCACGTATTAATCAAAATGCTACTGAAATGAACAGATTCAAAAGTGCTATTGAATCGACTAATGCTGAAATGCGTAAAACTAACCCGTCATTTCTGGATAAAGTTAAGAGTAAACTTGATAGCACAAATAAATCAGCTGAAAAAACGCATTCAGTTTTTAAATCC…
34	AFLO3B81670	NA	NA	NA	IPR000064;IPR023346	NLP_P60_dom;Lysozyme-like_dom	Endopeptidase, NLPC/P60 domain;Lysozyme-like domain	NA	NA	NA	NA	NA	NA	NA	PF00877	NLPC_P60	NlpC/P60 family	NA	NA	NA	NA	NA	NA	NA	NA	NA	NA	SSF53955;SSF54001	Lysozyme-like;Cysteine proteinases	NA	NA	NA	NA	NA	NA	NA	NA	NA	NA	NA	2	NA	NA	NA	NA	NA	NA	ATGTTAGGATTAACTCGTTTTGCAAGTGGTACTGGCTATCTGAAGAAGCTATATGAGCAAGCAAAATCATATAACAAAAATCCAACTAATACGTTAGACAAGATTTTTAATTTTACAGATAGTAGTCGGAAAGCATTGAAGTCGTTAATCGATGGTTCTCTGAAAAAGATTGGTAACCAGGCTGTTGATTGGTGGAGCCAATTATGGAAGATGGTTAACGACAAGATTAATGATGGCAATGCATCTGGCTTATTAAAGGCTGTTGAAAAATACGGTGAAGGCCATAAATATGTATGGGGTGCTTATGGACCTACTACATTTGATTGTTCAGGGTTAGTTTTATATGCTCTTAAAAAAGCTTATGGAATCAGCTATCCCCACTTTAGTGGTGCGCAATAT…
35	AFLO3B81112	NA	NA	NA	IPR000322;IPR033403	Glyco_hydro_31;DUF5110	Glycoside hydrolase family 31;Domain of unknown function DUF5110	PTHR43863;PTHR43863:SF2	FAMILY NOT NAMED;SUBFAMILY NOT NAMED	NA	NA	NA	NA	NA	PF01055;PF17137	Glyco_hydro_31;DUF5110	Glycosyl hydrolases family 31;Domain of unknown function (DUF5110)	NA	NA	NA	NA	NA	NA	NA	NA	NA	NA	SSF51011	Glycosyl hydrolase domain	NA	NA	NA	NA	NA	NA	NA	NA	NA	NA	NA	1	GO:0005975 GO:0006457	carbohydrate metabolic process;protein folding	GO:0003723 GO:0004553 GO:0030246 GO:0033919	RNA binding;hydrolase activity, hydrolyzing O-glycosyl compounds;carbohydrate binding;glucan 1,3-alpha-glucosidase activity	GO:0005576 GO:0005788 GO:0005794 GO:0005875 GO:0012505 GO:0016020 GO:0017177 GO:0031012 GO:0042470 GO:0070062	extracellular region;endoplasmic reticulum lumen;Golgi apparatus;microtubule associated complex;endomembrane system;membrane;glucosidase II complex;extracellular matrix;melanosome;extracellular exosome	ATGGTACGGGCGATGTTCCTTGATTATCCTGCCGAACCTGCCGCATACACTGATTTGGTTAAGTACCAGTATTTGTGGGGAGACAATTTCTTAATTGCCCCAATTTATCAAAATACTGCTAGTGATCAAGCCGGAAATGATATTCGCAATGGAATTTATTTACCAAACAAGAACCAGGTTTGGATTGACTACTACACCGGTAAGCAATATCAAGGAGGCCAGGTTATTAATAATTTTGCCGCTCCAATCTGGAAACTTCCAGTCTTTGTTAAAGCAGGTGCAATTATACCGGTTGCCCCAGCGACTAATACCCCGCAAGAATATCAGTCACTAAAGAATCAGCGCCAGTTTGAAATTTATCCTAGTGGACATAGCAGTTTTACTGTGTACGAAGATGAC…
36	AFLO3B83015	NA	NA	NA	IPR000477	RT_dom	Reverse transcriptase domain	NA	NA	NA	NA	NA	NA	NA	PF00078	RVT_1	Reverse transcriptase (RNA-dependent DNA polymerase)	NA	NA	NA	NA	NA	NA	NA	NA	NA	NA	NA	NA	NA	NA	NA	NA	NA	NA	NA	NA	NA	NA	NA	1	NA	NA	NA	NA	NA	NA	ATGGAAAAATCTCGAAGCACGATATCCGCAAGGTTCCATCCTCGGACCAAGTCTTTGGAATCTAGTCTTCGACGATTTGCTTCTTATCCTGAACCGGAAGGAATGCGTGGTATTGCATACACGGACGACCTCCTGGTATTAATAACCGGGAATAGTCGCTTCCAGATCGAGACAACTGGGCAGGATGTCACAAATGTAATCGAGGAATGGTGTGCTGAAGAGAAACTCACTCTCTCCGCACAGAAAACGGAAATGATTCTGCTAAGGAGCGCAGAAAGAAATGCGTGGCCATCGTGGTTGAGGGAACGTGCCATTTATGATATTCAGGGAAATAGTAGGAGAGATCCTGCGAGTTAA
37	AFLO3B80707	NA	NA	NA	IPR000514;IPR017853	Glyco_hydro_39;Glycoside_hydrolase_SF	Glycoside hydrolase, family 39;Glycoside hydrolase superfamily	PTHR12631;PTHR12631:SF9	ALPHA-L-IDURONIDASE;ALPHA-L-IDURONIDASE	NA	NA	PR00745	GLHYDRLASE39	Glycosyl hydrolase family 39 signature	PF01229	Glyco_hydro_39	Glycosyl hydrolases family 39	NA	NA	PS01027	GLYCOSYL_HYDROL_F39	Glycosyl hydrolases family 39 active site.	NA	NA	NA	NA	NA	SSF51445	(Trans)glycosidases	NA	NA	NA	NA	NA	NA	NA	R-HSA-2024096;R-HSA-2024101	HS-GAG degradation;CS/DS degradation	NA	NA	1	GO:0005975 GO:0005984 GO:0006027 GO:0030207 GO:0030209	carbohydrate metabolic process;disaccharide metabolic process;glycosaminoglycan catabolic process;chondroitin sulfate catabolic process;dermatan sulfate catabolic process	GO:0003940 GO:0004553 GO:0005102	L-iduronidase activity;hydrolase activity, hydrolyzing O-glycosyl compounds;receptor binding	GO:0030135 GO:0043202 GO:0070062	coated vesicle;lysosomal lumen;extracellular exosome	GAAGGGCAAAAGTATGCTGAACTTTAAAATAGAAAAAAGTATTCAAACTCCATTTCCGCATTATTGGGAAGTTTGTGTAGGTAGTTGTCACGCTTATACAGCTCTGCGTGAAGATTACCGGCAACAATTAACCAAGGCTCATCAAGAATTAGGGTTCAAATATGTCCGTTTTCATGGTCTGTTTGATGACGAGATGAGTGTTTGCATTGAAAATTTTGACTTTAATGGTCAATCGCAAGGCATTACCTATAATTTTGGTAATATTGATAATATTATCGACTTTTTGCTACGAATTGGTATGAAGCCATTTCTCGAATTAGGTTTTATGCCAACATGTCTGGCTTCCGGCGAAAATAAAATTTTTGCCTATGGCGGCAATAATACTATGCCTAAATCTGA…
38	AFLO3B81129	NA	NA	NA	IPR000524;IPR008920;IPR011711;IPR011991	Tscrpt_reg_HTH_GntR;TF_FadR/GntR_C;GntR_C;WHTH_DNA-bd_dom	Transcription regulator HTH, GntR;Transcription regulator FadR/GntR, C-terminal;GntR, C-terminal;Winged helix-turn-helix DNA-binding domain	PTHR43537;PTHR43537:SF12	FAMILY NOT NAMED;HTH-TYPE TRANSCRIPTIONAL REGULATOR LGOR-RELATED	NA	NA	NA	NA	NA	PF00392;PF07729	GntR;FCD	Bacterial regulatory proteins, gntR family;FCD domain	NA	NA	NA	NA	NA	PS50949	HTH_GNTR	GntR-type HTH domain profile.	SM00345;SM00895	gntr3;FCD_2	SSF46785;SSF48008	&quot;Winged helix&quot; DNA-binding domain;GntR ligand-binding domain-like	NA	NA	NA	NA	NA	NA	NA	NA	NA	NA	NA	1	GO:0006355	regulation of transcription, DNA-templated	GO:0003700	transcription factor activity, sequence-specific DNA binding	NA	NA	ACGATTTATAAACCTGGAAGTCGGATATCGGAAAAAATAATTGCAGCTGATTTAAAAATTGGTCGAACTCCTATTAGAGAAGCTCTATTGCGGCTAAGGCAAGAACAGTTAATCGATATTATTCCCCAATCTGGGACATATATTTCTAAAATTGATCTAAAAGCTGTACGGGATGCAAGGTTTGTCAGAACTAGCATTGAACAGGAAATTATGAAACAAGCAGCAGAGATCACCATGTCAGATTCTGAAAGAATTTCACTTGAAATAAATCTACAAAATCAAGATAAGGCAATGACTATTGAAGATCTAAATTTATTTCTAGACTTAGACAATGAATTTCACCACTTTTTTTACCAACTAACTAACCACGAGGAAGTTTGGAGTTGGATTAAAACGATC…
39	AFLO3B81695	NA	NA	NA	IPR000524;IPR008920;IPR011711;IPR011991	Tscrpt_reg_HTH_GntR;TF_FadR/GntR_C;GntR_C;WHTH_DNA-bd_dom	Transcription regulator HTH, GntR;Transcription regulator FadR/GntR, C-terminal;GntR, C-terminal;Winged helix-turn-helix DNA-binding domain	PTHR43537;PTHR43537:SF10	FAMILY NOT NAMED;HTH-TYPE TRANSCRIPTIONAL REGULATOR MCBR	NA	NA	PR00035	HTHGNTR	GntR bacterial regulatory protein HTH signature	PF00392;PF07729	GntR;FCD	Bacterial regulatory proteins, gntR family;FCD domain	NA	NA	NA	NA	NA	PS50949	HTH_GNTR	GntR-type HTH domain profile.	SM00345;SM00895	gntr3;FCD_2	SSF46785;SSF48008	&quot;Winged helix&quot; DNA-binding domain;GntR ligand-binding domain-like	NA	NA	NA	NA	NA	NA	NA	NA	NA	NA	NA	1	GO:0006355	regulation of transcription, DNA-templated	GO:0003700	transcription factor activity, sequence-specific DNA binding	NA	NA	ATGATTTCAAGCATGAAGGAAAAAGTTTATAATACTATTTTACAAAGAATTATTAGCTTGGCATATTTACCAGGTGAGAAAATATCGGAGAAAAATTTAAGTGAAGAATTAAATATCGGTAGGACACCAATCAGAGAAGCAATACTGCAATTAAGAGAAGAGGGATTAATTAAATCGGTCCCGCAGTCCGGTACATATATTTCGAAAATTAATTTACAAAAGGCGAAAGATGCACGATTTTTGCGGGAAAGTGTTGAGACCAAAATTATCCAAGAATCTATTGCTAAGCTCAATGAATATGATCTAATGGTTTTACAGCAAATTATTGACAGGCAGAAGTTAGAAGTAAGAACGACTCATGATGATATGAGATTTTTCGAATTAGATGAGCAATTTCAT…
40	AFLO3B83488	NA	NA	NA	IPR000602;IPR011013;IPR011330;IPR011682;IPR015341;IPR028995	Glyco_hydro_38_N;Gal_mutarotase_SF_dom;Glyco_hydro/deAcase_b/a-brl;Glyco_hydro_38_C;Glyco_hydro_38_cen;Glyco_hydro_57/38_cen	Glycoside hydrolase family 38, N-terminal domain;Galactose mutarotase-like domain;Glycoside hydrolase/deacetylase, beta/alpha-barrel;Glycosyl hydrolase family 38, C-terminal;Glycoside hydrolase family 38, central domain;Glycoside hydrolase families 57/38, central domain	PTHR11607;PTHR11607:SF41	ALPHA-MANNOSIDASE;SUBFAMILY NOT NAMED	NA	NA	NA	NA	NA	PF01074;PF07748;PF09261	Glyco_hydro_38;Glyco_hydro_38C;Alpha-mann_mid	Glycosyl hydrolases family 38 N-terminal domain;Glycosyl hydrolases family 38 C-terminal domain;Alpha mannosidase middle domain	NA	NA	NA	NA	NA	NA	NA	NA	SM00872	Alpha_mann_mid_2	SSF74650;SSF88688;SSF88713	Galactose mutarotase-like;Families 57/38 glycoside transferase middle domain;Glycoside hydrolase/deacetylase	NA	NA	NA	NA	NA	NA	NA	NA	NA	NA	NA	3	GO:0005975 GO:0006013 GO:0006491 GO:0006517 GO:0009313 GO:0016063 GO:0035010	carbohydrate metabolic process;mannose metabolic process;N-glycan processing;protein deglycosylation;oligosaccharide catabolic process;rhodopsin biosynthetic process;encapsulation of foreign target	GO:0003824 GO:0004553 GO:0004559 GO:0008270 GO:0015923 GO:0030246	catalytic activity;hydrolase activity, hydrolyzing O-glycosyl compounds;alpha-mannosidase activity;zinc ion binding;mannosidase activity;carbohydrate binding	GO:0005654 GO:0005773 GO:0005783 GO:0005795 GO:0005829	nucleoplasm;vacuole;endoplasmic reticulum;Golgi stack;cytosol	ATGGGTCACAACAACCTTATTATGGGAACATTTGGCATTACTGAAGGAGCAATTCCCTTTATGATGAAAGCCCCTCAGTTAATTATTGTTAACGTCATCGGTGGTGCGCTTGGCTCCGCAACTGGGGCATTTTTAGGAGTTAAATCTCATATACCGCCTTTAGGTGGCTTACCTGGAATTTTAACCGCAGATAATATTGTTGCTTACTTAGCCGGAGAGAAAATGTCTAAAAAAGTTTATGTGGTCCCTCATACCCACTGGGATCGGGAATGGTTTTTTACGTCATCTAAAGCAAAAGTTTACTTAATGAAAAACCTCCAAGATGTACTTGATTGCCTCGAAAAAGGTGGTGCCTTTAAGTCATTTTTATTAGATGGACAATCATCACTGATTACGGAT…
41	AFLO3B83487	NA	NA	NA	IPR000602;IPR011330	Glyco_hydro_38_N;Glyco_hydro/deAcase_b/a-brl	Glycoside hydrolase family 38, N-terminal domain;Glycoside hydrolase/deacetylase, beta/alpha-barrel	PTHR11607;PTHR11607:SF41	ALPHA-MANNOSIDASE;SUBFAMILY NOT NAMED	NA	NA	NA	NA	NA	PF01074	Glyco_hydro_38	Glycosyl hydrolases family 38 N-terminal domain	NA	NA	NA	NA	NA	NA	NA	NA	NA	NA	SSF88713	Glycoside hydrolase/deacetylase	NA	NA	NA	NA	NA	NA	NA	NA	NA	NA	NA	1	GO:0005975	carbohydrate metabolic process	GO:0003824 GO:0004559	catalytic activity;alpha-mannosidase activity	NA	NA	ATGATGGTTAAAGCATATTTTGTAAATCATACCCATTGGGATAGGGAATGGTATTTCACCACGCAGGATGCCCAAGTATTAAGCGACCAACTTTTTACGGAAGTTTTAGATGAACTTGAGCAACATCCAGAAGCCAATTTTACGCTTGATGGGCAAATGTCAATTGTAGATGATTACGTAGAAATTCATCCGGAAGCCCAAGCAAGAATTCACGCGTTAGTTGAACGCAAACAATTGTTTATTGGGCCTTGGTATACCCAAACTGACGCCTTGATACCAAATGCGGAATCATTATTACGCAACTTAATTATTGGCATTTTTGATGCACGGGCAAATTACGGCGAACCGATGATGCTAG
42	AFLO3B81611	NA	NA	NA	IPR000873;IPR020845	AMP-dep_Synth/Lig;AMP-binding_CS	AMP-dependent synthetase/ligase;AMP-binding, conserved site	PTHR43201;PTHR43201:SF7	FAMILY NOT NAMED;PEROXISOMAL-COENZYME A SYNTHETASE	NA	NA	NA	NA	NA	PF00501	AMP-binding	AMP-binding enzyme	NA	NA	PS00455	AMP_BINDING	Putative AMP-binding domain signature.	NA	NA	NA	NA	NA	SSF56801	Acetyl-CoA synthetase-like	NA	NA	NA	NA	NA	NA	NA	NA	NA	NA	NA	1	GO:0008152 GO:0019233	metabolic process;sensory perception of pain	GO:0003824	catalytic activity	NA	NA	ATGAATGTTAACGCTAAGATAGCAACCGTTAAGGAGCTATGGAACTGGCGTTTACGCCAGAGTCGACAAAAAGTATTTGTAATTGAAAATGATCAGCAATATAGCTACGGTGAGATGGCCAAGTTAGTTGCGGCTAAAATTAAGTTACTGAAAGCATGTCGAATTGGTCAGGGCGATTTGGTTGCACTGCAGTTTGAGCTTGATGTTGAAAATGTTGCTACTATTCTTGCGTGCATTGAACTTGGTGCGGTGATAAATCCACTGAATCCGCATTTGGACATTACCGAAGTTGAAAACTTAGTGGAAAGGTTTCAACCTTGTGCAATTATTTCCCAAGCTTCGGTTCGTGGACGAGATACCATTAGCAACTTTAAACACTTAAAGCATTATCAAGTTGAA…
43	AFLO3B80019	NA	NA	NA	IPR000883;IPR023616	Cyt_C_Oxase_1;Cyt_c_oxase-like_su1_dom	Cytochrome c oxidase subunit I;Cytochrome c oxidase-like, subunit I domain	PTHR10422;PTHR10422:SF30	CYTOCHROME C OXIDASE SUBUNIT 1;CYTOCHROME C OXIDASE SUBUNIT 1	NA	NA	PR01165	CYCOXIDASEI	Cytochrome c oxidase subunit I signature	NA	NA	NA	NA	NA	NA	NA	NA	NA	NA	NA	NA	NA	SSF81442	Cytochrome c oxidase subunit I-like	NA	NA	NA	00190+1.9.3.1	Oxidative phosphorylation	PWY-3781;PWY-4521;PWY-6692;PWY-7279	Aerobic respiration I (cytochrome c);Arsenite oxidation I (respiratory);Fe(II) oxidation;Aerobic respiration II (cytochrome c) (yeast)	R-HSA-5628897;R-HSA-611105	TP53 Regulates Metabolic Genes;Respiratory electron transport	NA	NA	5	GO:0006264 GO:0009060 GO:0030431 GO:0055114 GO:1901214	mitochondrial DNA replication;aerobic respiration;sleep;oxidation-reduction process;regulation of neuron death	GO:0004129 GO:0005506 GO:0009055 GO:0020037	cytochrome-c oxidase activity;iron ion binding;electron carrier activity;heme binding	GO:0016021 GO:0045277	integral component of membrane;respiratory chain complex IV	ATGGTGGTTGGAGAAGGAAGAGCCGTCGGCGCGGCGCGACCGGTTCGCTTCGTAGCTGGAGGCTGGAGGCAAAATAGAGCGTGGAACTGGCGCGAGTCATCGAGCAGAGCAGATTCGACGATCCGCGAGAGTCTGAGAGGCCCTTGTCTGTCCTCCATCTGCACGAACGTTCGTCTCCGGGCGCACAAGTTTTCTCCGGATCGAAACTGGTTCGCTGATAGGAAGTTGTCTCGCCGTTCTATCGCCTACCTGCGTATCTCCTCCACGCCAGAAATTTTTATCGTTGCCATTGTTCCGTTCCCCTCCTCCTCTCGAACAGGGATGGAGATGGAATTTCATCCGAGTCCCCCCTCCTCGAATTCCCCAAACACCTCGGCTCGTGAATTCCCGATTGTTATT…
44	AFLO3B83624	NA	NA	NA	IPR000887;IPR004703	Aldlse_KDPG_KHG;PTS_sugar-sp_permease	KDPG/KHG aldolase;Phosphotransferase system, sugar-specific permease component	PTHR33843;PTHR33843:SF10	FAMILY NOT NAMED;SUBFAMILY NOT NAMED	NA	NA	NA	NA	NA	PF01081;PF03611	Aldolase;EIIC-GAT	KDPG and KHG aldolase;PTS system sugar-specific permease component	NA	NA	NA	NA	NA	NA	NA	NA	NA	NA	SSF51569	Aldolase	NA	NA	NA	00030+4.1.2.14	Pentose phosphate pathway	PWY-2221;PWY-6507;PWY-7242;PWY-7310;PWY-7562	Entner-Doudoroff pathway III (semi-phosphorylative);4-deoxy-L-threo-hex-4-enopyranuronate degradation;D-fructuronate degradation;D-glucosaminate degradation;3,6-anhydro-alpha-L-galactopyranose degradation	NA	NA	NA	NA	3	GO:0008152 GO:0009401	metabolic process;phosphoenolpyruvate-dependent sugar phosphotransferase system	GO:0016829	lyase activity	GO:0016021	integral component of membrane	ACTTTTTGATGGGGCTGGCAATCGTAATGCTTATCCTATTTTATTTTTCAGCTTTAGTTGCTGGCCCGGCGATGACCTTCACGGCAGGAATGGGCGTATTAATGTATGGTGTCGGCATGTTCTTAGAGGAAATCACCAATGCGTTCGTAGCGATTTCAACTAAATTTATCCCCGGCTCGCGGCCAGCGCTTGATGTCCCAACTGTTTTCCCATTTGCCCCAACCGCTGTTTTGATTGGCTTTGTTAGCTCATATGCAGCTGGATTAGTTGCAATCGGAATTATGGTTCTTTTGCACAGTCCGATTATTATTATTCCGGCAGCACATATTTGCTTTTTCTCTGGCGGAACTGCTGCTATCTTTGGCAATTCAACCGGTGGCTGGCGTGGCGCCATTGCAG…
45	AFLO3B82995	NA	NA	NA	IPR001127;IPR001360;IPR003352;IPR011055;IPR013013;IPR017853	PTS_EIIA_1_perm;Glyco_hydro_1;PTS_EIIC;Dup_hybrid_motif;PTS_EIIC_1;Glycoside_hydrolase_SF	Phosphotransferase system, sugar-specific permease EIIA type 1;Glycoside hydrolase family 1;Phosphotransferase system, EIIC;Duplicated hybrid motif;Phosphotransferase system, EIIC component, type 1;Glycoside hydrolase superfamily	PTHR30175	INVERTASE-RELATED	NA	NA	NA	NA	NA	PF00232;PF00358;PF02378	Glyco_hydro_1;PTS_EIIA_1;PTS_EIIC	Glycosyl hydrolase family 1;phosphoenolpyruvate-dependent sugar phosphotransferase system, EIIA 1;Phosphotransferase system, EIIC	NA	NA	PS00371	PTS_EIIA_TYPE_1_HIS	PTS EIIA domains phosphorylation site signature 1.	PS51093;PS51103	PTS_EIIA_TYPE_1;PTS_EIIC_TYPE_1	PTS_EIIA type-1 domain profile.;PTS_EIIC type-1 domain profile.	NA	NA	SSF51261;SSF51445	Duplicated hybrid motif;(Trans)glycosidases	TIGR00830	PTBA	PTS system, glucose subfamily, IIA component	NA	NA	NA	NA	NA	NA	NA	NA	2	GO:0005975 GO:0009401	carbohydrate metabolic process;phosphoenolpyruvate-dependent sugar phosphotransferase system	GO:0004553 GO:0008982	hydrolase activity, hydrolyzing O-glycosyl compounds;protein-N(PI)-phosphohistidine-sugar phosphotransferase activity	GO:0016020	membrane	ATGGGTATTTTAGCTTTATCAGTCCTAGGCCCAATTGGTGATATTCTTGGCGGCTACTTATCGCAATTTTTTACGTATCTCAGCGTCAATGCGAGCTGGGCGCCAGCATTACTTGTTGGTGGATTATTGCCAATTATGGTAATGTTCGGTTTACACAATGGAATTGCTCCTTTGGGCGTTATGCAAATGGCAACCAAGGGCTACGACAGTATCTTTGGCCCTGGATGTGTAGTTTCTAATATGTGCTCTGCAACTGCAGCGTTGGTTGTGGCATTAAGAACACGTGATCAAAAAACTAAAGAATTAGGCTTTTCAAGTTCAATTACTGCGTACATGGGAATTACTGAGCCTGCACTTTATGGTATTAATTTACCTAAACGATATCCGTTAATTGCTGCA…
46	AFLO3B81324	NA	NA	NA	IPR001127;IPR003352;IPR011055;IPR013013	PTS_EIIA_1_perm;PTS_EIIC;Dup_hybrid_motif;PTS_EIIC_1	Phosphotransferase system, sugar-specific permease EIIA type 1;Phosphotransferase system, EIIC;Duplicated hybrid motif;Phosphotransferase system, EIIC component, type 1	PTHR30175	INVERTASE-RELATED	NA	NA	NA	NA	NA	PF00358;PF02378	PTS_EIIA_1;PTS_EIIC	phosphoenolpyruvate-dependent sugar phosphotransferase system, EIIA 1;Phosphotransferase system, EIIC	NA	NA	NA	NA	NA	PS51093;PS51103	PTS_EIIA_TYPE_1;PTS_EIIC_TYPE_1	PTS_EIIA type-1 domain profile.;PTS_EIIC type-1 domain profile.	NA	NA	SSF51261	Duplicated hybrid motif	NA	NA	NA	NA	NA	NA	NA	NA	NA	NA	NA	2	GO:0009401	phosphoenolpyruvate-dependent sugar phosphotransferase system	GO:0008982	protein-N(PI)-phosphohistidine-sugar phosphotransferase activity	GO:0016020	membrane	TTTTTGTGGCTTGCACAAACTGCTTTTTACTTCATGCCAATCCTGATTGCCTACGGTACAGCAAAGTACATGAAAGGCAATCCGGTTTTTGCAATGACAGTCACAGCTGCATTGTTATATCCGGAGTTTATGAAATATATCGGTGCAAGTAAAACCTTGACATTGTTTGGCATTCCGGTAATGGCGAATAGTTACGCTAGTTCACTGCTTCCGGCTTTATTAGTTACGATTTTAGTCGTTTATCTTGAACGTTTTTTCAATAAAGTTGTTCCGGGAGTGTTGCGGGCGGTCTTTGCGCCAATGTTGACGCTTGCTGTAGCAATGCCAATTGCCTTTTTAGTTTTAGCACCTCTTGGTTCAATTGTTGGCAACTATGTTGTGCAATTCTTTGTATGGCTC…
47	AFLO3B81402	NA	NA	NA	IPR001127;IPR011055	PTS_EIIA_1_perm;Dup_hybrid_motif	Phosphotransferase system, sugar-specific permease EIIA type 1;Duplicated hybrid motif	PTHR30175;PTHR30175:SF11	INVERTASE-RELATED;PTS SYSTEM BETA-GLUCOSIDE-SPECIFIC EIIBCA COMPONENT	NA	NA	NA	NA	NA	PF00358	PTS_EIIA_1	phosphoenolpyruvate-dependent sugar phosphotransferase system, EIIA 1	NA	NA	NA	NA	NA	PS51093	PTS_EIIA_TYPE_1	PTS_EIIA type-1 domain profile.	NA	NA	SSF51261	Duplicated hybrid motif	TIGR00830	PTBA	PTS system, glucose subfamily, IIA component	NA	NA	NA	NA	NA	NA	NA	NA	1	GO:0009401	phosphoenolpyruvate-dependent sugar phosphotransferase system	NA	NA	NA	NA	TCATCAGAGCATGCTCTCAATGCACCGGCATATGGTCGAATTGAGGATCTTTCGAAGGTTGATGATACCACTTTTGCTAGTGGCGTAATGGGACAAGGTATAGCGATTATTCCCGCCAGCGGAAGGCTTTATGCACCTGGCAATGGTATTGTGACAGCAACTTTTAAAACCGGGCATGCTATTGGCCTTCACCTCGATAATAACGCTGATATTTTACTCCATATTGGTATTGATACGATTGAATTAAAGGGTCAGGGATTTAGGCAGCTAGTTGAAAAAGGACAAAAAGTTACAGCAGGTCAGGAACTAATTGAGTTTGACCTAGATAAGATTAAGGAAGCTGGCTATGATCCTACAATCATGATGATTATCACTAACACCCAGGATTTTTTGCAAGTT…
48	AFLO3B81029	NA	NA	NA	IPR001347	SIS	Sugar isomerase (SIS)	PTHR10937;PTHR10937:SF17	GLUCOSAMINE--FRUCTOSE-6-PHOSPHATE AMINOTRANSFERASE, ISOMERIZING;SUBFAMILY NOT NAMED	NA	NA	NA	NA	NA	NA	NA	NA	NA	NA	NA	NA	NA	PS51464	SIS	SIS domain profile.	NA	NA	SSF53697	SIS domain	NA	NA	NA	NA	NA	NA	NA	NA	NA	NA	NA	1	GO:0005975 GO:1901137	carbohydrate metabolic process;carbohydrate derivative biosynthetic process	GO:0004360 GO:0030246	glutamine-fructose-6-phosphate transaminase (isomerizing) activity;carbohydrate binding	NA	NA	ATGTCTGCTTTACCGGTTAAGTGCATTAATGCTGCCGACTTGAATAGTGTGCATCCACGCGACTTAACCCAAGACTCAATTGTAATAACGGCAAGCGATAGCGGAAACACGCCCGAAATTATTGAAGCTGCTAAATGGTTGATTAAAGCTAATATTCGCTTAATTGCATTTACGAAAAAAAGCGGTGAGCTTGGTGGGCTAGCACCAAATGTTATTGAAGTTAATGGCTCTACCGGGGCAGGGCAAAATTATTACATGGCAGAAGCAATGTTAATTTATCGCTTACTATACAAGCACGGTGATTTCGCAGGATACCCTAAATTTGCTGATCAACTAAAAGGTGTATTCAAGGATTTATTGGCAATTCGTAAAAAGTTTGAACCTAAAGCCGATAAGATT…
49	AFLO3B81405	NA	NA	NA	IPR001347	SIS	Sugar isomerase (SIS)	NA	NA	NA	NA	NA	NA	NA	PF01380	SIS	SIS domain	NA	NA	NA	NA	NA	NA	NA	NA	NA	NA	SSF53697	SIS domain	NA	NA	NA	NA	NA	NA	NA	NA	NA	NA	NA	1	GO:0005975	carbohydrate metabolic process	GO:0030246	carbohydrate binding	NA	NA	AAGAATCTCATGCAGGCTGCTAAAATAATTAGCGAGGCCAAGCTTACAGCTTTATTTGCCGAAAGTCCCAACAATTATCTTGCCGAACTTTTTAAAAGAAAATTGCTTAGTATTGGTAAGCAAAGCAACGTTTTTAAAGATGATGAGGTAGGACTGGAAACGGGCACTTTAAGTCAAACTGACTGCGCTATAGTCATTTCATATTCCGGTACAAAAGTTAGCAGGGCAGTTCGTCACGTTAATCTTCTTCTTGCTAACAAAGTGCCGGTGATTGCGCTAACGAGTGATACTACTAACTTTTTAAGAACCATGCAGATATCAGTTTGCTTATGGCATCGGAAGAAAACTTATATACAAAAATTGCGGCGTTTCAAACGGAAACATCAATCGAATATATTT…
50	AFLO3B80916	NA	NA	NA	IPR001604	DNA/RNA_non-sp_Endonuclease	DNA/RNA non-specific endonuclease	NA	NA	NA	NA	NA	NA	NA	PF13930	Endonuclea_NS_2	DNA/RNA non-specific endonuclease	NA	NA	NA	NA	NA	NA	NA	NA	SM00892	Endonuclease_NS_2	NA	NA	NA	NA	NA	NA	NA	NA	NA	NA	NA	NA	NA	1	NA	NA	GO:0003676 GO:0016787 GO:0046872	nucleic acid binding;hydrolase activity;metal ion binding	NA	NA	ATGAAACCTTGGGCTTACCAAGAAGAGCGGCAATTAAGCTTAATGGACTTAGACAGCTTAGGTCGAGGACAAGGCAGCCACATTCAAGTTAAAAAGTCACAACTACCAACAGAGCCGCGTGCCCCGCGACTAACAGTTAATCCAAGTGGTTGGCATAACTATAAAATTGAAACGACCAAAAATGGTAAGCCATATACTGCTTGGGCATTTAATCGGGGACACTTGGTTGGTTACCAGTTTTCTGGTTTAAATAATGAATTGCGCAACTTAATAACTGAAACGGCATACCTCAACCAGGGTTCAACAACTGGAATGGATGATGATAATCCTAAGGCAATGCTCTACTACGAGAATCGTTTACGCCAATGGATTAATGATCATCCGCAAAGCAAGTTAGAC…
51	AFLO3B90291	NA	NA	NA	IPR001878	Znf_CCHC	Zinc finger, CCHC-type	NA	NA	NA	NA	NA	NA	NA	NA	NA	NA	NA	NA	NA	NA	NA	PS50158	ZF_CCHC	Zinc finger CCHC-type profile.	NA	NA	NA	NA	NA	NA	NA	NA	NA	NA	NA	NA	NA	NA	NA	1	NA	NA	GO:0003676 GO:0008270	nucleic acid binding;zinc ion binding	NA	NA	ATGACAAAATCCATTGAAGACACGTTGAAACTCATACTTGAAAAGTTAATCAAACTTGAGGAAAGTATAATAAAAAACTCTGAAGAAATTAAATATCTAGCTCAAAAACTAGAAAAGCAATCTATTGCCAAAGATGATTCTACTAGTATGATTACAGAAGCAATTAATAACAATTGTATCAAACTATTGGAAAACCCTAAGAAAACAGAAATAGAAGCGATCGTCAATCAAAGCACATCACAAAACGTTCATTCAGAGTTTGAGAACCATCAACTACATATTGATGAGTCAGAAACCGTTAATAGTTTGCATCAGAATAATACAATTTCAAATACGGCAGAGAACAGTAAAAGAGAATTAAAGAATAGAAAACAAGAAAACAAAACAAAATCATATAAT…
52	AFLO3B81351	NA	NA	NA	IPR001991	Na-dicarboxylate_symporter	Sodium:dicarboxylate symporter	NA	NA	NA	NA	NA	NA	NA	PF00375	SDF	Sodium:dicarboxylate symporter family	NA	NA	NA	NA	NA	NA	NA	NA	NA	NA	SSF118215	Proton glutamate symport protein	NA	NA	NA	NA	NA	NA	NA	NA	NA	NA	NA	1	NA	NA	GO:0015293	symporter activity	GO:0016021	integral component of membrane	ATGGTTAATCAGATTTTGATAGCAGTTATTCTAGGCATAATTTTTGCTTTTGTGTTGCCGAATGTTTCGGTACATTTAAAAATAATCGGTGATATTTTTTTGAAACTAATGCAAATGTCAATTCCGCTTTTAGTGCTGGGACAAATTATTCAAGCAGTTGGAAGTATTAAACCTGATGAATTAAGTAACTTGGGAATAAAAACCATTATTACTTTTTAA
53	AFLO3B81701	NA	NA	NA	IPR001996;IPR018113	PTS_IIB_1;PTrfase_EIIB_Cys	Phosphotransferase system, IIB component, type 1;Phosphotransferase system EIIB, cysteine phosphorylation site	PTHR30175;PTHR30175:SF14	INVERTASE-RELATED;PTS SYSTEM ARBUTIN-, CELLOBIOSE-, AND SALICIN-SPECIFIC EIIBC COMPONENT-RELATED	NA	NA	NA	NA	NA	PF00367	PTS_EIIB	phosphotransferase system, EIIB	NA	NA	PS01035	PTS_EIIB_TYPE_1_CYS	PTS EIIB domains cysteine phosphorylation site signature.	PS51098	PTS_EIIB_TYPE_1	PTS_EIIB type-1 domain profile.	NA	NA	SSF55604	Glucose permease domain IIB	NA	NA	NA	NA	NA	NA	NA	NA	NA	Y	NA	1	GO:0009401	phosphoenolpyruvate-dependent sugar phosphotransferase system	GO:0008982	protein-N(PI)-phosphohistidine-sugar phosphotransferase activity	NA	NA	ATGAAAATTGATGTAAAGCAGACTGCTGATCAATTAGTTAGCCTAGTAGGAGGAGTCAATAATATTAGCTCGATTACACATTGCTTAACACGACTAAGATTTTATCTTAAAGACCCTGATAAAGCACAGACGGAAAAGATTAAAAAGGTGCGCGGTGTGTTGGGCGCATTATATAAAATGGGTCAGTATCAAATTGTTTTAGGTGAAAATGTAGGAGTAGTTTTTGACTTTATTGCTAAAAACTATGGAATTAAAAGTGAAGAACTACAAGGTGTTGATCAAGAAGCT
54	AFLO3B82673	NA	NA	NA	IPR002053;IPR010026;IPR017853;IPR018077	Glyco_hydro_25;Phage_holin_LL-H;Glycoside_hydrolase_SF;Glyco_hydro_fam25_subgr	Glycoside hydrolase, family 25;Phage holin, LL-H family;Glycoside hydrolase superfamily;Glycoside hydrolase, family 25 subgroup	NA	NA	NA	NA	NA	NA	NA	PF01183;PF09682	Glyco_hydro_25;Phage_holin_6_1	Glycosyl hydrolases family 25;Bacteriophage holin of superfamily 6 (Holin_LLH)	NA	NA	NA	NA	NA	NA	NA	NA	SM00641	glyco_25	SSF51445	(Trans)glycosidases	NA	NA	NA	NA	NA	NA	NA	NA	NA	NA	NA	3	GO:0009253 GO:0016998	peptidoglycan catabolic process;cell wall macromolecule catabolic process	GO:0003796	lysozyme activity	NA	NA	ATGACTCAAATTACAAACATTTTAAACGCAACATTACCATACATTGTATTGCTTGCTGTAGGCATTGTAGCTATCTATTCTTACGCAAGGCAGCACAATCCTGCCGTGGCCGATAAGATTAAATGGCTTTATGATGTGGCACAGTACATTGTTACCCAACAGGCAACTCATGAAGACGCAACGGGAGCCGAAAAGAAAGCGGCTGCTACTGCTGCATTATTGGCCCAGGCTAAGCAATCAAAGACTAAGATTACCTCAGAAACGGCTAAGGGGATGATTGAGAAAGCTTATCAAGAAACGCAAAAAGATGATGAGCCAGCTGGCATTGATGACATTCAGGGCTTTGCCGAAGATGACGAAGAACAACCAGTAGCCAATCCAATGGCCAACACACCAACT…
55	AFLO3B80834	NA	NA	NA	IPR002104;IPR004107;IPR011010	Integrase_catalytic;Integrase_SAM-like_N;DNA_brk_join_enz	Integrase, catalytic domain;Integrase, SAM-like, N-terminal;DNA breaking-rejoining enzyme, catalytic core	NA	NA	NA	NA	NA	NA	NA	PF00589;PF14659	Phage_integrase;Phage_int_SAM_3	Phage integrase family;Phage integrase, N-terminal SAM-like domain	NA	NA	NA	NA	NA	NA	NA	NA	NA	NA	SSF56349	DNA breaking-rejoining enzymes	NA	NA	NA	NA	NA	NA	NA	NA	NA	NA	NA	2	GO:0006310 GO:0015074	DNA recombination;DNA integration	GO:0003677	DNA binding	NA	NA	ATGGCTAATGGCAATTACCAGTATTCAATCAGATATAGGGATGCCTCTTTTGACGGTGTGCGTAAAAAATCTGTTGTTATTAAAAGAAATACTACTTACGCCAAGAATAATGCCGAGAAAATTGTTAAAAATAAGATAATGACCAGTCTGGGACAGTTGGGACAGATTAGTATTACTTTCGGCGATCTGTCCCAAAAATATTTTGGGACACTTGAAAAACGTGGTGTTGCTTACAAGACTATTACAACCTACAGGGCTCAGCTTAATCAGATGAACAAGGTTTTTAAAGATAAGCACATAGCAACTATTACAACCGTACAGATTAATAGATATCTTGACGACGTTTTCTATGCGAAACAATTCGGCTACATCACTGACAATCCAATGAATGATGTAAAA…
56	AFLO3B80818	NA	NA	NA	IPR002178;IPR016152	PTS_EIIA_type-2_dom;PTrfase/Anion_transptr	PTS EIIA type-2 domain;Phosphotransferase/anion transporter	NA	NA	NA	NA	NA	NA	NA	NA	NA	NA	NA	NA	NA	NA	NA	PS51094	PTS_EIIA_TYPE_2	PTS_EIIA type-2 domain profile.	NA	NA	SSF55804	Phoshotransferase/anion transport protein	NA	NA	NA	NA	NA	NA	NA	R-HSA-425381	Bicarbonate transporters	NA	NA	1	GO:0006810	transport	GO:0005215	transporter activity	NA	NA	ATGCTTGCTTCAAGTCCAAAAGACGAAAAAAGGTTCCGGCAAGTTTTTGATGAACTTTCTGAAGTGATCATTAATGATAATAAAGTTGCCAAATTATCTAGGTGTAACAGTTATCAAGAATTTATCAAAGAAATTATCAAAATTGAATAA
57	AFLO3B80863	NA	NA	NA	IPR002178;IPR016152	PTS_EIIA_type-2_dom;PTrfase/Anion_transptr	PTS EIIA type-2 domain;Phosphotransferase/anion transporter	PTHR30505;PTHR30505:SF14	FRUCTOSE-LIKE PERMEASE;SUBFAMILY NOT NAMED	NA	NA	NA	NA	NA	PF00359	PTS_EIIA_2	Phosphoenolpyruvate-dependent sugar phosphotransferase system, EIIA 2	NA	NA	NA	NA	NA	PS51094	PTS_EIIA_TYPE_2	PTS_EIIA type-2 domain profile.	NA	NA	SSF55804	Phoshotransferase/anion transport protein	NA	NA	NA	NA	NA	NA	NA	R-HSA-425381	Bicarbonate transporters	NA	NA	1	GO:0006810	transport	GO:0005215	transporter activity	NA	NA	ATGTTTTTTAACAAAAAAACTGATTTCGAACATGTCGTTAAAGATCTAGCAAATGAATTAATAAAACAAGGTTTAGTTGATCCTGATTATCCTAAACAAGTAATTTTGCGTGAGAAAAAATTTCCGACCGGATTACCAACCAAGTCGGTTGGCGTTTCAATTCCTCATACAGATGCTAAATGGACTCGGCACAATGCAATTGCTATTGGTATTCTTAAACATCCAATTAAGCAAATAGTAATGGGTAGCAAGGATAAAGAGGTAAGTGTTGAATAG
58	AFLO3B81197	NA	NA	NA	IPR002178;IPR016152	PTS_EIIA_type-2_dom;PTrfase/Anion_transptr	PTS EIIA type-2 domain;Phosphotransferase/anion transporter	PTHR30185;PTHR30185:SF8	CRYPTIC BETA-GLUCOSIDE BGL OPERON ANTITERMINATOR;FRV OPERON REGULATORY PROTEIN-RELATED	NA	NA	NA	NA	NA	PF00359	PTS_EIIA_2	Phosphoenolpyruvate-dependent sugar phosphotransferase system, EIIA 2	NA	NA	NA	NA	NA	PS51094	PTS_EIIA_TYPE_2	PTS_EIIA type-2 domain profile.	NA	NA	SSF55804	Phoshotransferase/anion transport protein	NA	NA	NA	NA	NA	NA	NA	R-HSA-425381	Bicarbonate transporters	NA	NA	1	GO:0006810	transport	GO:0005215	transporter activity	NA	NA	ATGTCCACTGCTTCACTTGTGCGTGCTAAGTTAGAAGCTCAGTTTGCTTCTTTTTTGAACATTACTGGGACCTATACATATGATGAATATTTAAAGGGTATGGCCACTGGCAACGATTTTTTGATTTCTATGGTACCGATTAGTGATGCTGTAATACCAGTTATTCAAATTGATTTGGCTAATTTCCACAATGATATTTTACAGTTATCGGAATATTTAAAGTCGCTTAGTAACCCTTATCGTGCAATTGATAAATTATTTGATGAGGAAAATATCTATCTGATTAGTGAAAAGATGTCGAAAAAGCAACTTTTAAACATGCTGATACATAACTTGGAACAGAAAAAAATTGTCAGTCAGGGCTTTATGTCTAAAGTTTATGAACGTGAGCAAATGTAT…
59	AFLO3B83609	NA	NA	NA	IPR002492	Transposase_Tc1-like	Transposase, Tc1-like	NA	NA	NA	NA	NA	NA	NA	PF01498	HTH_Tnp_Tc3_2	Transposase	NA	NA	NA	NA	NA	NA	NA	NA	NA	NA	NA	NA	NA	NA	NA	NA	NA	NA	NA	NA	NA	NA	NA	2	GO:0006313 GO:0015074	transposition, DNA-mediated;DNA integration	GO:0003677	DNA binding	NA	NA	ATGTTTGTTTTCAAAGCAAATATTATTAAAAAACGATTTCTGCAGCTAAATCATTTAGACAACTTATCAATGATCAAGAAAAACATTAATTACGCAAGAAAAATACAACGGTTGTCAGTGGCTGATTCGCGGAGGACTGCAGTAGATATTCATACAAGTACAATACGATATCGTTTAACGTCTTTCGGATTAAATAGACGACACAGAGTAAGAAAACCACTAATTACGAAGAAAAATCGCTTAGCTCAACTTAAATTTGCTCGTGAACATGTTCAGTGGTCAGTAAAAGATTAG
60	AFLO3B81841	NA	NA	NA	IPR002547;IPR012340;IPR027855	tRNA-bd_dom;NA-bd_OB-fold;DUF4479	tRNA-binding domain;Nucleic acid-binding, OB-fold;Domain of unknown function DUF4479	NA	NA	NA	NA	NA	NA	NA	PF01588;PF14794	tRNA_bind;DUF4479	Putative tRNA binding domain;Domain of unknown function (DUF4479)	NA	NA	NA	NA	NA	PS50886	TRBD	tRNA-binding domain profile.	NA	NA	SSF50249	Nucleic acid-binding proteins	NA	NA	NA	NA	NA	NA	NA	R-HSA-379716	Cytosolic tRNA aminoacylation	NA	NA	2	NA	NA	GO:0000049	tRNA binding	NA	NA	GTCAAGACCAAGGTAAAAGTGAATACGAAGAAAAAGAAGATATTACGCGTATTACTGACAAAAAAGTAATTGATTATGACAAGTTACCAAATGGTGAGGTTAAACTTTCTGAAAAGGATTTAGCTGCTTTAAATCAAAAACTTGCCGATGCAGGTTTTGATGATAAGCTTGCTTATGGTAAGCCGACACTAGTTTACGGCTATGTGAAAACTTGTGAAAAACATCCTGATTCTGATCACCTGCATGTTACAACCATCGATGTTGGTAATGGTGAGGAGCATCAAATAGTTTGTG
61	AFLO3B80984	NA	NA	NA	IPR002560	Transposase_DDE	Transposase IS204/IS1001/IS1096/IS1165, DDE domain	NA	NA	NA	NA	NA	NA	NA	PF01610	DDE_Tnp_ISL3	Transposase	NA	NA	NA	NA	NA	NA	NA	NA	NA	NA	NA	NA	NA	NA	NA	NA	NA	NA	NA	NA	NA	NA	NA	2	NA	NA	NA	NA	NA	NA	ATGCTCAACCGCTCCTTTAATGCCTGGCGGGTTCAGGTGATGAAGCAGTATCCCAAGTCTACTAGAACGGGTCAAGCCGCACTACATTTAAAGGATCGACTGACGCAAGCCCAGATTGTCGCAGACGGGCTAGCGCTTGACCCGATCCTAGAAAATACTTACAGCTTCATGCTAGATCTGCGTCAGGCTCTTAAGAAAAAAAATGTTAACCAAATAAAGACCTGTCTTAAGCGCTCATGTAAATTGGGCAGGCAACGCGTAAAACTTCAAACGCAGTCTGCCCGATCTGCTTTAATGCAGTCCAACGGCTGTCTGGAAGGAACCAACCGCAAAATTAAGCAGATCGAACGCACAGCCTATGGCTATGGCAATTTTAAACATTTAGTTGCTCGCATTAAA…
62	AFLO3B81381	NA	NA	NA	IPR002781	TM_pro_TauE-like	Transmembrane protein TauE-like	PTHR30269;PTHR30269:SF28	TRANSMEMBRANE PROTEIN YFCA;SUBFAMILY NOT NAMED	NA	NA	NA	NA	NA	PF01925	TauE	Sulfite exporter TauE/SafE	NA	NA	NA	NA	NA	NA	NA	NA	NA	NA	NA	NA	NA	NA	NA	NA	NA	NA	NA	NA	NA	NA	NA	1	NA	NA	NA	NA	GO:0016021	integral component of membrane	ATGGCGTCTTTAGTATCTTATCCTGCTTTGTTAATTGCCGGCTGCTCACCAGTTGCTGCCAATATTACAAATACAGCGGCACTGATTTTTACCGGTCCTGGAGTATTGCTTGCTTCAGCTAAAAAGATGAAGGGACATTGGCTAGAATTTGGCAAATATTGTTTGTTTCTCTTGTCTGGCGCTGTTATTGGTGGCCTGTTATTAATCGCATTTCCCGGTAAAGTCTTTGAAAAAGTTGTTCCTTTTTTAGTTTTATTCTCTTCACTTGGTTTAATGCTTTCAGGTGGTAAAAAAGCTAAAAAGAATAAACATAGGAGAAAAAGCAGGAAGGGAATAGTTGCTGCATATGTGGGTTTGTTTTTAGGTGGGATCTATTCAGGCTATTTTGGTGCAGCAGCG…
63	AFLO3B81679	NA	NA	NA	IPR003188	PTS_IIA_lac/cel	Phosphotransferase system, lactose/cellobiose-type IIA subunit	PTHR34382	FAMILY NOT NAMED	PIRSF000699	PTS_IILac_III	NA	NA	NA	PF02255	PTS_IIA	PTS system, Lactose/Cellobiose specific IIA subunit	NA	NA	NA	NA	NA	PS51095	PTS_EIIA_TYPE_3	PTS_EIIA type-3 domain profile.	NA	NA	SSF46973	Enzyme IIa from lactose specific PTS, IIa-lac	NA	NA	NA	NA	NA	NA	NA	NA	NA	NA	NA	1	GO:0009401	phosphoenolpyruvate-dependent sugar phosphotransferase system	NA	NA	NA	NA	GTGATGCTAAAACTGCTTTAATTAATGCTTTAGATGAAGCGAAAAATGGTAATTATGAAAAGGCAAAGGAGTTAATCAAAAGTGCTGATGTCTCTTTAAATGATGCCCATAATGCGCAAACAAAATTAATGAGTGCAGAAGCAAGCGGCGAGGAAATGGAAACGACCTTTATTATGTCACATGGGCAAGACACCTTAATGACAACAATGCTTTTGCGTGACGAAATTAATATTTTGTTGATTTGTATCAAAAATCAATGA
64	AFLO3B81774	NA	NA	NA	IPR003352	PTS_EIIC	Phosphotransferase system, EIIC	PTHR33989;PTHR33989:SF8	FAMILY NOT NAMED;SUBFAMILY NOT NAMED	NA	NA	NA	NA	NA	PF02378	PTS_EIIC	Phosphotransferase system, EIIC	NA	NA	NA	NA	NA	NA	NA	NA	NA	NA	NA	NA	NA	NA	NA	NA	NA	NA	NA	NA	NA	NA	NA	2	GO:0009401	phosphoenolpyruvate-dependent sugar phosphotransferase system	GO:0008982	protein-N(PI)-phosphohistidine-sugar phosphotransferase activity	GO:0016020	membrane	ATGTCGATGGGAGTTTTAGCACTTATGGCTTCTTCTTCAGTTGCCAAGGCCTTGACCGATTCTTTTAACTTAAATTTGCCAAAAACCGGTCAAATTCCAACTGTTGGTGTCCAATTTACCGCGCAATACCTTCTTATTTTGGGGCTTTTCGTTAGCTTTTCGCGCTGCAACTGGAACGAACTTAGCGGCCTGGATTATTCAAATACTATCCCCGTTGTTACTGCGGCAGATGGCTATTTCGGCTTAGCAATTGTTTATGGTGCAATGGCCTTTTTCTGGTTTATTGGAATTCAAGGTCCGTCAATTGTCGAACCAGCAGTTACTGCAATTTATTTAAGTAATGTTGAACTTAATTTATCGGCTTGGAAAGCAGGCAATATTGCCGGTGCTAACAGGATT…
65	AFLO3B82909	NA	NA	NA	IPR003352	PTS_EIIC	Phosphotransferase system, EIIC	PTHR30175;PTHR30175:SF11	INVERTASE-RELATED;PTS SYSTEM BETA-GLUCOSIDE-SPECIFIC EIIBCA COMPONENT	NA	NA	NA	NA	NA	PF02378	PTS_EIIC	Phosphotransferase system, EIIC	NA	NA	NA	NA	NA	NA	NA	NA	NA	NA	NA	NA	NA	NA	NA	NA	NA	NA	NA	NA	NA	NA	NA	1	GO:0009401	phosphoenolpyruvate-dependent sugar phosphotransferase system	GO:0008982	protein-N(PI)-phosphohistidine-sugar phosphotransferase activity	GO:0016020	membrane	ATGAACAATGTGGCAGAATTTGGCTATGATACGTTGATTTATCCTGCGGCATTGCCAAGTAATGCTGCAATGGGGGCAGCTGCTTTAGCCATTGCAGTATTTAGCAAAAAGAAAATTACTAAGGGTGAAGGCTTTTCGGCAGGTTTTACTGGCTTAATGGGAATTACGGAACCTTCTATTTTTGGCTTTTTGCTTCCATACCGAAAAGCTTTAATTGGTGCGATTGCTGGTGGAGCTATCGGCGGATTAGTTGGTGGCTTGCTTCACATTAAACAGGGGGCTTTGATGGCACCAGGCTTTATTGCTCTCATTTCATATTTTGTTGGACAAAACCCAACTTTAAACTTTATTTGTGGAATTATTACCTGGTTAACGGGAATTATTGCTAGTTTTGTTATT…
66	AFLO3B80934	NA	NA	NA	IPR003352;IPR004501	PTS_EIIC;PTS_EIIC_3	Phosphotransferase system, EIIC;Phosphotransferase system, EIIC component, type 3	PTHR33989	FAMILY NOT NAMED	NA	NA	NA	NA	NA	PF02378	PTS_EIIC	Phosphotransferase system, EIIC	NA	NA	NA	NA	NA	PS51105	PTS_EIIC_TYPE_3	PTS_EIIC type-3 domain profile.	NA	NA	NA	NA	NA	NA	NA	NA	NA	NA	NA	NA	NA	NA	NA	1	GO:0009401	phosphoenolpyruvate-dependent sugar phosphotransferase system	GO:0008982	protein-N(PI)-phosphohistidine-sugar phosphotransferase activity	GO:0016020 GO:0016021	membrane;integral component of membrane	ATGAGTAATTATATTAATCAAAAAATCGTCCCAAGTGTTATCAAATTTAGCAATACCAAAATTATCAAGGCATTAAAAGACGGGATGATGTTTGTCCTACCGTTTTTAATTGTTGGTTCCCTTTTTATGTTACTGGCAAACATTCCAATTCCTGCAGTTGCAAATGCGATTACTGCAAGTGGTTGGGCTGCGATCTTTAATCAGATTTATCAATCGTCGTTTTCCTTAATGGCAATTTTTGCGACCGTTGGAATCGCGTATACCTATATCAAAAATGAGCAGATCGATTCTCCTTTTTCCGGCAGTTTGGCTGCATTGAGTGCATTTATTATGGTACTGCCACCTGATATTAAGCCTAAAGCTGGTCAGATTATTCCAAATGTGATTTCTAAGACCTGG…
67	AFLO3B81174	NA	NA	NA	IPR003352;IPR004501	PTS_EIIC;PTS_EIIC_3	Phosphotransferase system, EIIC;Phosphotransferase system, EIIC component, type 3	PTHR33989;PTHR33989:SF10	FAMILY NOT NAMED;SUBFAMILY NOT NAMED	NA	NA	NA	NA	NA	PF02378	PTS_EIIC	Phosphotransferase system, EIIC	NA	NA	NA	NA	NA	PS51105	PTS_EIIC_TYPE_3	PTS_EIIC type-3 domain profile.	NA	NA	NA	NA	NA	NA	NA	NA	NA	NA	NA	NA	NA	NA	NA	1	GO:0009401	phosphoenolpyruvate-dependent sugar phosphotransferase system	GO:0008982	protein-N(PI)-phosphohistidine-sugar phosphotransferase activity	GO:0016020 GO:0016021	membrane;integral component of membrane	GTACCACCAGCAGTTGGTCAAAGCTTTTCCGTTCTTCTACCATCACTGATAACTTTGAGTATATTTGGAATTACTGCCGCTATTTTAGCCGCTTTTAACGTTGATTTAGTAACCTTGATTTCGCGGCTAATCCAAGAGCCTTTAAGAAAGGTTAATACTTCTCTTCCAGGGTTTTTACTAATTTATTCGACGGGCAACTTCTTATATACACTAGGTATTCACCAAACAGTTATTAACGGATCATTGCTAGATCCATTAAATTTAGTAAATATGAATGAAAATACCGCTGCAGTTTCAGCAGGCCGACCAGCTACGCATATTATTAATACAGATTTTGTAACAGTTTATTCTCAAATGGGTGGAACTGGTTTGACAATTGCGTTAATTATAGCCGTTTTA…
68	AFLO3B81279	NA	NA	NA	IPR003352;IPR004501	PTS_EIIC;PTS_EIIC_3	Phosphotransferase system, EIIC;Phosphotransferase system, EIIC component, type 3	PTHR33989	FAMILY NOT NAMED	NA	NA	NA	NA	NA	PF02378	PTS_EIIC	Phosphotransferase system, EIIC	NA	NA	NA	NA	NA	PS51105	PTS_EIIC_TYPE_3	PTS_EIIC type-3 domain profile.	NA	NA	NA	NA	NA	NA	NA	NA	NA	NA	NA	NA	NA	NA	NA	1	GO:0009401	phosphoenolpyruvate-dependent sugar phosphotransferase system	GO:0008982	protein-N(PI)-phosphohistidine-sugar phosphotransferase activity	GO:0016020 GO:0016021	membrane;integral component of membrane	GTACCTCTTCAAAAAATTGGCACTTCTCCTTGGGCAATTTTGTTTGTGGTAATTTTGAATAGTTTGTTTTTTTACTTTGGTATTCATTCTTTAGCTATTAATTCAATCGTTATGCCAATACTTTATGCACTAGACTTTCAAAACTTAGCCGCTTTCAATGCCGGTCACACAGTTACTAATTTAATTACCTGGCGTTTTTTCTACATGACAAGTAAAATCGGCGGTACTGGTTGTGCATTAGGATTAGTAATTTATTTAGCTTTCTTTGCAAAATCTAAGCAATTTAAAATGTTGGGTCGTTTATCACTTATTCCGGTTCTATTTAATACAGACGAACCAATCATCTTTGGCTTACCAATTGTACTAAATCCAATTATGTTCATTCCGTTTATTCTTGCC…
69	AFLO3B82281	NA	NA	NA	IPR003352;IPR011608;IPR013013	PTS_EIIC;PRD;PTS_EIIC_1	Phosphotransferase system, EIIC;PRD domain;Phosphotransferase system, EIIC component, type 1	PTHR30175;PTHR30175:SF11	INVERTASE-RELATED;PTS SYSTEM BETA-GLUCOSIDE-SPECIFIC EIIBCA COMPONENT	NA	NA	NA	NA	NA	PF00874;PF02378	PRD;PTS_EIIC	PRD domain;Phosphotransferase system, EIIC	NA	NA	NA	NA	NA	PS51103;PS51372	PTS_EIIC_TYPE_1;PRD_2	PTS_EIIC type-1 domain profile.;PRD domain profile.	NA	NA	SSF63520	PTS-regulatory domain, PRD	NA	NA	NA	NA	NA	NA	NA	NA	NA	NA	NA	4	GO:0006355 GO:0009401	regulation of transcription, DNA-templated;phosphoenolpyruvate-dependent sugar phosphotransferase system	GO:0008982	protein-N(PI)-phosphohistidine-sugar phosphotransferase activity	GO:0016020	membrane	ATGACGGGCTGCCAACTTGATGATCAAGAAGCGGCTACGATTGCGCTTCATATTGTTAATAGTGAATCGGAAGGAGATAACCGTTTTAATAGTTACCGCATTGTGGAAATTGTGCACTGGGTTACTAATTATGTTTTCGATTATTTCAAGATCGATTTTGCTAAAAAAGCTGATCCCCTGTATTACCAACGCTTTGATACTCACGTTCGCTTTTTTGCTCAAAGAATTTTAAATAACGACTATAAAAATAATGATGACAACTCATCAATTTTATTCGTACTAACGGATAAACAATATCAAAGAGAAAAAGAGTGTGTGAATAGCCTTAGCGCCGCTTTTGAACAGAAATTTAATATTAAAATTTTTCTAGAAGAACGGGCGTATTTAGTGCTTCATATT…
70	AFLO3B81459	NA	NA	NA	IPR003352;IPR013013	PTS_EIIC;PTS_EIIC_1	Phosphotransferase system, EIIC;Phosphotransferase system, EIIC component, type 1	PTHR30175	INVERTASE-RELATED	NA	NA	NA	NA	NA	PF02378	PTS_EIIC	Phosphotransferase system, EIIC	NA	NA	NA	NA	NA	PS51103	PTS_EIIC_TYPE_1	PTS_EIIC type-1 domain profile.	NA	NA	NA	NA	NA	NA	NA	NA	NA	NA	NA	NA	NA	NA	NA	2	GO:0009401	phosphoenolpyruvate-dependent sugar phosphotransferase system	GO:0008982	protein-N(PI)-phosphohistidine-sugar phosphotransferase activity	GO:0016020	membrane	TTGTTATCGGTCCCGGCGTGGATACACTATTCTCAGCAATAGAGCAAATTTTAGGTGTTAGTAAAAATGAGGATAACGATGCTAAAAAAGAAACTTCGCATAAAATTAGTGGAAAGTTAATTTTGGATGTTATTTCTGGCGTCTTTCAACCTATTCTGCCTGCATTAGTGGCCGGTGGTATGTTAAAAGGAATTTTAGCAATTGTTTTAGCTATTTCTCCAAGCCTTGAAAAAAATACCACAATGGCATTATTTAACTTAATTGCTGATGTTCCTTTTTACTTTTTACCTTTTCTACTGGCAATTTCTTCATCAAGGAAGTTCAAACTAAATGAATTTTTAGGTATTTGTATGGCGGGGGCACTACTTTATCCAACATTTGTAGCTAAGATAGCTAGCG…
71	AFLO3B81570	NA	NA	NA	IPR003352;IPR013013	PTS_EIIC;PTS_EIIC_1	Phosphotransferase system, EIIC;Phosphotransferase system, EIIC component, type 1	PTHR30175;PTHR30175:SF11	INVERTASE-RELATED;PTS SYSTEM BETA-GLUCOSIDE-SPECIFIC EIIBCA COMPONENT	NA	NA	NA	NA	NA	PF02378	PTS_EIIC	Phosphotransferase system, EIIC	NA	NA	NA	NA	NA	PS51103	PTS_EIIC_TYPE_1	PTS_EIIC type-1 domain profile.	NA	NA	NA	NA	NA	NA	NA	NA	NA	NA	NA	NA	NA	NA	NA	2	GO:0009401	phosphoenolpyruvate-dependent sugar phosphotransferase system	GO:0008982	protein-N(PI)-phosphohistidine-sugar phosphotransferase activity	GO:0016020	membrane	ATGGCAGGTGCCGGCATGGTAAAAGCTTTATTAACGGTATTAGCCACATTGCACTGGCTGTCACCTACAAGCACATTGTATTTGGTCTGCTCAGCAGCTGGAGTAACTTTATCTAAACAATTTAAGGCTGATCCATTTGTCGGCGGAGCATTGGGTGCAGCTTTATTGGAACCCAATTTTACCAGCTTGATTGGTAAACATGGGTTAAAACTGTTGGGACTAGGACTAGAACCAATCGATTATTCGATGACGGTTTTTCCTATTTTTGTAATTATTGCGGTTTATGTCTTACTTGATAAACTGCTTAAAAAAACCCGGCAATTACAATTGTTTTTGAATCCAATGATTTGTTTATTATTATTGGTTCCAGCAACAGTTTTAGTATTTGGTCCATTCGGT…
72	AFLO3B82910	NA	NA	NA	IPR003352;IPR013013	PTS_EIIC;PTS_EIIC_1	Phosphotransferase system, EIIC;Phosphotransferase system, EIIC component, type 1	PTHR30175	INVERTASE-RELATED	NA	NA	NA	NA	NA	PF02378	PTS_EIIC	Phosphotransferase system, EIIC	NA	NA	NA	NA	NA	PS51103	PTS_EIIC_TYPE_1	PTS_EIIC type-1 domain profile.	NA	NA	NA	NA	NA	NA	NA	NA	NA	NA	NA	NA	NA	NA	NA	1	GO:0009401	phosphoenolpyruvate-dependent sugar phosphotransferase system	GO:0008982	protein-N(PI)-phosphohistidine-sugar phosphotransferase activity	GO:0016020	membrane	ATGCCTGTAATCGTAGCAGCTGGCTTTTTACTAGCAATTCTTAACTTATGTAAGACCTTTTTCGGCTTAAATCCCAAGAGTGGTACGGCCATAGTTTTAACAAGTATTGCTTCAGCCGGCTTTTATTACATCCCTATTTTTGTTGGTTTTCAAACTGCTTTAAAATTAAAAATTCCCGCTGCAATGGGAGCTTTTTTAGGGGCGATATTAACTTTTGGTGATATTAACAATGTTGCTGGCTTGAATTTTTTAGGTATTAATTTACCTAAAATGCAGTATAACGGTACTTTATTGACTTCAATCTTAGGAGTATTATTACTGGCATTTATCTATAAGTTAATTGATAAGATTATGCCCAAAGAAATTACCTACTTTTTTACACCTTTGCTAGCAATTTTA…
73	AFLO3B83451	NA	NA	NA	IPR003352;IPR013013	PTS_EIIC;PTS_EIIC_1	Phosphotransferase system, EIIC;Phosphotransferase system, EIIC component, type 1	PTHR30175	INVERTASE-RELATED	NA	NA	NA	NA	NA	PF02378	PTS_EIIC	Phosphotransferase system, EIIC	NA	NA	NA	NA	NA	PS51103	PTS_EIIC_TYPE_1	PTS_EIIC type-1 domain profile.	NA	NA	NA	NA	NA	NA	NA	NA	NA	NA	NA	NA	NA	NA	NA	2	GO:0009401	phosphoenolpyruvate-dependent sugar phosphotransferase system	GO:0008982	protein-N(PI)-phosphohistidine-sugar phosphotransferase activity	GO:0016020	membrane	ATGGGAAGTCAATGGTCTGGAGATCAATTTCAGATCATCATTGGTCAGGCAGTTGCTGATGTTTTTAATGCTATTATTAAGCAAAATGATTTGCATATCGAAGCTGCCATCTTATCCCCCTTAATTCCTTTGTTAGTGACTGCAGGAATGATCAAGGTAGTAGTAATTTTAGGCGAGTCTTTTGGATGGCTTTCTGCTACATCGCCTACAACTATAGTTTTGAGCTTTGCATCCGATGCCGGATTTTATTTTTTACCTATATTTGTTGGCTCGGCGGCCGCTAAACGATTCGGAGCAGATTCTGGTTTAGGCATGCTGGTAGGTGCAATTTTAATACATCCAACTTTTATTTCATTAGTTACCAAAGGAACTGCACTTTCGGTCTTTGGCTTACCAATC…
74	AFLO3B81170	NA	NA	NA	IPR003497;IPR005039	BRO_N_domain;Ant_C	BRO N-terminal domain;Antirepressor protein, C-terminal	PTHR36180;PTHR36180:SF4	FAMILY NOT NAMED;SUBFAMILY NOT NAMED	NA	NA	NA	NA	NA	PF02498;PF03374	Bro-N;ANT	BRO family, N-terminal domain;Phage antirepressor protein KilAC domain	NA	NA	NA	NA	NA	PS51750	BRO_N	Bro-N domain profile.	SM01040	Bro_N_2	NA	NA	NA	NA	NA	NA	NA	NA	NA	NA	NA	NA	NA	1	NA	NA	GO:0003677	DNA binding	NA	NA	ATGAAGAGCCTTATTTTGTGGCCAATGATGTTGCAAAAAATTCTTGGCTACAAAAAAACAAGAAATGCGATTGCCAGACATGTTGAGCTGGATGATAAAAAGGACGCCCCAGTTCAGGGCCCCCTTGGTGGAACTCAAAAAGCTACAGTAATTAACGAGTCTGGTCTCTATAGCTTAATTATGAGTAGCAAAATGCCTGAGGCTAAGAGGTTTAAACATTGGGTTACAAGTGAGGTATTACCAGCTATTAGACAGCATGGAGCGTACCTTACTGACCAGAAAGCCTTGGATATTATTACTAACAAGGACGGCCTAGCTGGCCTGCTTAAGCAAGCTGCTGACCAGCTTGAACAAAAAGATATCCAAATTAAGCGGTTGGAACCTAAAGCTCTATTTGCA…
75	AFLO3B81488	NA	NA	NA	IPR003500	RpiB_LacA_LacB	Sugar-phosphate isomerase, RpiB/LacA/LacB family	PTHR30345;PTHR30345:SF8	RIBOSE-5-PHOSPHATE ISOMERASE B;RIBOSE-5-PHOSPHATE ISOMERASE B	NA	NA	NA	NA	NA	PF02502	LacAB_rpiB	Ribose/Galactose Isomerase	NA	NA	NA	NA	NA	NA	NA	NA	NA	NA	SSF89623	Ribose/Galactose isomerase RpiB/AlsB	TIGR00689	rpiB_lacA_lacB	sugar-phosphate isomerase, RpiB/LacA/LacB family	00052+5.3.1.26	Galactose metabolism	NA	NA	NA	NA	NA	NA	1	GO:0005975	carbohydrate metabolic process	GO:0016853	isomerase activity	NA	NA	TTATTGTGGCACCGGCGTCGGTATTCACTAGCCGCAAACAAGGTTAAAGGCATTAGAGCGTGTGTATGCAGTGACTGCTATTCAGCTAAACTATCAAGAATGCATAACAATACTAATGTTTTGGCATTTGGCTCTCGTGTAGTTGGTTTAGAACTGGCCAAGATGATTGTAAAAAATTGGCTTGAAGCAAAATTTATTGGTGGGCGGCACCAAAGAAGAATTGAAGAACTAGCTGCGATTGAAGATG
76	AFLO3B81386	NA	NA	NA	IPR003677;IPR011439	DUF148;DUF1542	Domain of unknown function DUF148;Domain of unknown function DUF1542	NA	NA	NA	NA	NA	NA	NA	PF02520;PF07564	DUF148;DUF1542	Domain of unknown function DUF148;Domain of Unknown Function (DUF1542)	NA	NA	NA	NA	NA	NA	NA	NA	NA	NA	NA	NA	NA	NA	NA	NA	NA	NA	NA	NA	NA	NA	NA	1	NA	NA	NA	NA	NA	NA	ATGGTCACCGACATAGCTCGAAACCTGAACATATACCAAGTTCGAGCTCTGCAGGAGAAAATAGATCAAATAGCGAACAACAGAACGCTAACCATGGATGAGATACAAGAGATGATCGACGAGATGAAGAAACGCACTCCTCGAGCCATAAAGAAACTGGAGGAGGCTCGGGATTTGCTAACGGAGCTC
77	AFLO3B81884	NA	NA	NA	IPR003680;IPR029039	Flavodoxin_fold;Flavoprotein-like_dom	Flavodoxin-like fold;Flavoprotein-like domain	PTHR10204	NAD P H OXIDOREDUCTASE-RELATED	NA	NA	NA	NA	NA	PF02525	Flavodoxin_2	Flavodoxin-like fold	NA	NA	NA	NA	NA	NA	NA	NA	NA	NA	SSF52218	Flavoproteins	NA	NA	NA	NA	NA	NA	NA	NA	NA	NA	NA	1	GO:0006805 GO:0007613 GO:0043525 GO:0055114 GO:0070374 GO:1904707 GO:2000379	xenobiotic metabolic process;memory;positive regulation of neuron apoptotic process;oxidation-reduction process;positive regulation of ERK1 and ERK2 cascade;positive regulation of vascular smooth muscle cell proliferation;positive regulation of reactive oxygen species metabolic process	GO:0001512 GO:0005515 GO:0046872	dihydronicotinamide riboside quinone reductase activity;protein binding;metal ion binding	GO:0005654 GO:0005829 GO:0070062	nucleoplasm;cytosol;extracellular exosome	CCATATACACCACACGGTTTTAACGGTAAGCCTAATCAGAAAAAGGCCTTGTTTATTGTCGGAGAACCAAGAAAATATAGTTTAACTTATGATTTGGTTTATACCGCTATGCGCTATTTAGAGGAAAATGATTGGGCAGTTGAATTACGCGATCTCTATGATCTTAATTATGATCCCGTTTTACACCAAGAAGAATTTTACTATGTCAAAGATGGTCTAGGTGAAGCACCAGCTTACCTCGCTCAAGAGCAGTCGTTTGTAAAAAAGGCAGATGTGGTTCTTTTTGCTTATCCCAATTGGCATGATGCCCCTGTAAGTATTGTTAAGGGCTATATTGAAAAAGTTTTTGCTGCCGGATTTGCCTATGAAGCAGGTAAAAATGGTCTAACCGGGTTACTT…
78	AFLO3B81018	NA	NA	NA	IPR003766;IPR032466	Uronate_isomerase;Metal_Hydrolase	Uronate isomerase;Metal-dependent hydrolase	PTHR30068;PTHR30068:SF5	URONATE ISOMERASE;URONATE ISOMERASE	NA	NA	NA	NA	NA	PF02614	UxaC	Glucuronate isomerase	NA	NA	NA	NA	NA	NA	NA	NA	NA	NA	SSF51556	Metallo-dependent hydrolases	NA	NA	NA	00040+5.3.1.12	Pentose and glucuronate interconversions	PWY-7247;PWY-7248	Beta-d-glucuronide and D-glucuronate degradation;Pectin degradation III	NA	NA	NA	NA	2	GO:0006064	glucuronate catabolic process	GO:0008880	glucuronate isomerase activity	NA	NA	ATGAGTTTGTTAAATAAAGATTTTTTACTGGAAAATAATCTTGCTAAGACACTTTTTCATGATTATGCTCAAAAAATGCCGATTATTGATTTTCATTGCCATTTGAACCCAGAAGAAATCTACGAAAATAAGAATTATCCAAATATTACTCGGATTTGGCTCAATGAAGGTACTTATGGTGATCATTATAAGTGGCGCTTGATGAGAGCAAATGGCGTGGATGAAAAGTATATTACTGGAGATGGCGACGAATATCAAAAATTTGTTGAATGGGCAAAAACAATTGAGAAATCTTATGGTAATCCACTCTACGAATGGACACATTTGGAACTGCGGCGTTTCTTTAAGATTGATGACGAATTGACAGAAGAATCTGCGCCCAAAATTTGGCAAGAAGCT…
79	AFLO3B81589	NA	NA	NA	IPR003953;IPR023753	FAD-binding_2;FAD/NAD-binding_dom	FAD-dependent oxidoreductase 2, FAD binding domain;FAD/NAD(P)-binding domain	NA	NA	NA	NA	NA	NA	NA	PF00890	FAD_binding_2	FAD binding domain	NA	NA	NA	NA	NA	NA	NA	NA	NA	NA	SSF51905	FAD/NAD(P)-binding domain	NA	NA	NA	NA	NA	NA	NA	R-HSA-611105;R-HSA-71403	Respiratory electron transport;Citric acid cycle (TCA cycle)	NA	NA	2	GO:0055114	oxidation-reduction process	GO:0016491	oxidoreductase activity	NA	NA	ATGAGTTTAACAAAGTTATCAACTTATGATGTAGTCGTTGTTGGTTCGGGTGCTGCAGGTCAGGCTGCTGCCTTAACCGCCGTTGAACATGGCAATCAAGTTTTAATGCTCGAAAAAGGACGTCATACAGTTGATTCATATTTACAGAAAAAGCAAGGAATTGACGTTTCAACAATTGATGTTTTGCAAGAAGAAGTCGAATATTCAAAGTATAAAGCTGATTCAAGAATTTGGCGCAAATATTTAGATGCTAGTGCAGAAAATGTCCAATGGCTCCATGATGAAGGTGTTAAGTATGAAGGCGTTCAAGCAATGGGAGCAGGAGAGGCTACTTGGCATATTATGAAGGCTTTGGGGACGCAGTGA
80	AFLO3B81753	NA	NA	NA	IPR003953;IPR023753	FAD-binding_2;FAD/NAD-binding_dom	FAD-dependent oxidoreductase 2, FAD binding domain;FAD/NAD(P)-binding domain	NA	NA	NA	NA	NA	NA	NA	PF00890	FAD_binding_2	FAD binding domain	NA	NA	NA	NA	NA	NA	NA	NA	NA	NA	SSF51905	FAD/NAD(P)-binding domain	NA	NA	NA	NA	NA	NA	NA	R-HSA-611105;R-HSA-71403	Respiratory electron transport;Citric acid cycle (TCA cycle)	NA	NA	1	GO:0055114	oxidation-reduction process	GO:0016491	oxidoreductase activity	NA	NA	ATGGCTAAATTTGAAATTGTAGTTGTTGGCGCCGGTGCATCAGGAATTAGTGCTGCTTTAGCGGCAGCTCAGGCTGGTGCTAAAGTTGCCTTGCTTGAAAAAGGCGATAAATTTGGTGGCGCCGGAATGTTTGGTGCGCAGGGATTATTTGCGGTTGAAA
81	AFLO3B81637	NA	NA	NA	IPR004341;IPR011608	CAT_RNA-bd_dom;PRD	CAT RNA-binding domain;PRD domain	PTHR30185;PTHR30185:SF6	CRYPTIC BETA-GLUCOSIDE BGL OPERON ANTITERMINATOR;CRYPTIC BETA-GLUCOSIDE BGL OPERON ANTITERMINATOR	NA	NA	NA	NA	NA	PF00874;PF03123	PRD;CAT_RBD	PRD domain;CAT RNA binding domain	NA	NA	NA	NA	NA	PS51372	PRD_2	PRD domain profile.	SM01061	CAT_RBD_2	SSF50151;SSF63520	SacY-like RNA-binding domain;PTS-regulatory domain, PRD	NA	NA	NA	NA	NA	NA	NA	NA	NA	NA	NA	1	GO:0006355	regulation of transcription, DNA-templated	GO:0003723	RNA binding	NA	NA	ATGCAAGTTATTAAAAAAATCAATAATAACGTGGCAATTTGCTTAGATCAAAACAATGACGAATTGGTAGCTTTTGGCAAAGGCATCGGTTTTCCGGCAATGCCTTATAAACTGACAGATTTGCGTAAGATCAGAATGACTTTTTACCGCATGGATACCCACAATTTTAAGTTAATCCAGGAATTGCCAGCAAATATATTGGATATCAGTGCCGAGATTATTCATGAGGCACAAGTTGTTCTTAAGCACGATCTAAATCCAAATATTTTGTTTAGTTTAGCGGATCACATTAATTTTGCGATTGAGCGGGCTAAGCAAAATCTTAAAGTTGAGTACCCTTTTTCCTATGATATTCAGGCGTTTTATCCGCAAGAATACCATGTAGGTGAATTAGCAGTG…
82	AFLO3B81702	NA	NA	NA	IPR004341;IPR011608	CAT_RNA-bd_dom;PRD	CAT RNA-binding domain;PRD domain	PTHR30185;PTHR30185:SF6	CRYPTIC BETA-GLUCOSIDE BGL OPERON ANTITERMINATOR;CRYPTIC BETA-GLUCOSIDE BGL OPERON ANTITERMINATOR	NA	NA	NA	NA	NA	PF00874;PF03123	PRD;CAT_RBD	PRD domain;CAT RNA binding domain	NA	NA	NA	NA	NA	PS51372	PRD_2	PRD domain profile.	SM01061	CAT_RBD_2	SSF50151;SSF63520	SacY-like RNA-binding domain;PTS-regulatory domain, PRD	NA	NA	NA	NA	NA	NA	NA	NA	NA	NA	NA	1	GO:0006355	regulation of transcription, DNA-templated	GO:0003723	RNA binding	NA	NA	ATGAAGGAAGTTTTTAAAGTCACGCAAGCAATGAACAATAATGCTGTATTTGCAATTAATTTAAAAAGAGAGGAAGTGATTTTAGTTAAAGAAGGCATAGGATTTAAGTGTAAAAACAAGATTGTAGTTGCCTCAAACGATATTCAGGTTTTTTCACCGCAAACGGCGCTTGAAAAAGATAGGTTTGAGCAATTTATCAACGAAATTCCGTTTGAATTTACCCAATTTACGATTAGAACAATTGGACTGGCTAAGCAAAAATTACATTTAAAATTTTCAAATGGTTTAATTTTCACTTTGGCAGATCATATTAGCTTTGCGGTTGAAAGGTATCGAAATAATGAAAATATTGATTATCTTGATAATGAAGAAATTAAGCAATTCTTTCCTGAAATCTAT…
83	AFLO3B81061	NA	NA	NA	IPR004700	PTS_IIC_man	Phosphotransferase system, mannose/fructose/sorbose family, IIC subunit	PTHR32502;PTHR32502:SF18	FAMILY NOT NAMED;N-ACETYLGALACTOSAMINE PERMEASE IIC COMPONENT 1-RELATED	NA	NA	NA	NA	NA	PF03609	EII-Sor	PTS system sorbose-specific iic component	NA	NA	NA	NA	NA	PS51106	PTS_EIIC_TYPE_4	PTS_EIIC type-4 domain profile.	NA	NA	NA	NA	NA	NA	NA	NA	NA	NA	NA	NA	NA	NA	NA	1	GO:0009401	phosphoenolpyruvate-dependent sugar phosphotransferase system	NA	NA	GO:0016021	integral component of membrane	GAATTACCAGTTTGGGGAGCTTCGGTACCTGATTACCAAACAGCCGCATTAATTGGAACATATCTAACGATTGCAACTCATCAAAAAGCTGCAATTGGGATTGCACTAGCGATTCCTATTGCACTATTAATTGTTCAAGTTGATGTTTTAAAATGGTCTGCCAATATTTTCTGTCAACAGCGGGCAGAAAAATTTGCGGAGCAAGAAAATTATCAAATGATTAATTGGATGCAATATTTGGCTACGTTATTTACAAGTTTTGTTTCAGGAATTCCGGTTTTATTAACTGTTATCTTGGGACCAAAGATTGTGGGTAGTTTTATAAATTATATTCCTGCTTGGTTATCAGGCGGTCTTAAAACCGCGGCCGGAATTTTACCAGCAGTCGGAATTGGCAT
84	AFLO3B83050	NA	NA	NA	IPR004700;IPR004701;IPR004720	PTS_IIC_man;PTS_EIIA_man-typ;PTS_IIB_sorbose-sp	Phosphotransferase system, mannose/fructose/sorbose family, IIC subunit;Phosphotransferase system, mannose-type IIA component;Phosphotransferase system, sorbose subfamily IIB component	PTHR32502;PTHR32502:SF18	FAMILY NOT NAMED;N-ACETYLGALACTOSAMINE PERMEASE IIC COMPONENT 1-RELATED	NA	NA	NA	NA	NA	PF03609;PF03610;PF03830	EII-Sor;EIIA-man;PTSIIB_sorb	PTS system sorbose-specific iic component;PTS system fructose IIA component;PTS system sorbose subfamily IIB component	NA	NA	NA	NA	NA	PS51096;PS51106	PTS_EIIA_TYPE_4;PTS_EIIC_TYPE_4	PTS_EIIA type-4 domain profile.;PTS_EIIC type-4 domain profile.	NA	NA	SSF52728;SSF53062	PTS IIb component;PTS system fructose IIA component-like	NA	NA	NA	NA	NA	NA	NA	NA	NA	NA	NA	4	GO:0009401	phosphoenolpyruvate-dependent sugar phosphotransferase system	GO:0008982	protein-N(PI)-phosphohistidine-sugar phosphotransferase activity	GO:0005737 GO:0016021	cytoplasm;integral component of membrane	ATGACTAAGGACAAATCTGCTAGTCAAGGTAAAAAAGAACTAGTAGAAATGATCAATTCCGCTGGCAATACAGAATTAATCATATTGACTGATTTATTCGGCGGTAGTGTAACCAACATTTGTACGGAATTGCTGTTAGAAAAAGATAATTTTGAATTACTGACTGGACTTAATTTGCCGATGTTATTAACTTTGCTGACGATTGATACTAATGAACTAAAAATGTCTGAGCTAATTAGAAAATTGGAACATGCGGGCATGGCAGGAGTAATTAATGTTGGCCAGAAGGTGCGAGAAAGGATAGTAGCTATTGGGTGGACATCCAATTCAGGTGCTAACACAATATTGGTGGCAAATGACGAGGCACAAAAAGACCAAGTCAAAGCAATGGCACTGAAC…
85	AFLO3B81545	NA	NA	NA	IPR004700;IPR004720	PTS_IIC_man;PTS_IIB_sorbose-sp	Phosphotransferase system, mannose/fructose/sorbose family, IIC subunit;Phosphotransferase system, sorbose subfamily IIB component	PTHR33799;PTHR33799:SF14	FAMILY NOT NAMED;SUBFAMILY NOT NAMED	NA	NA	NA	NA	NA	PF03609;PF03830	EII-Sor;PTSIIB_sorb	PTS system sorbose-specific iic component;PTS system sorbose subfamily IIB component	NA	NA	NA	NA	NA	NA	NA	NA	NA	NA	SSF52728	PTS IIb component	NA	NA	NA	NA	NA	NA	NA	NA	NA	NA	NA	3	GO:0009401	phosphoenolpyruvate-dependent sugar phosphotransferase system	GO:0008982	protein-N(PI)-phosphohistidine-sugar phosphotransferase activity	GO:0005737 GO:0016021	cytoplasm;integral component of membrane	ATGATTGTTTTAACAAGAGTAGATCACCGTTTATTACATGGTCAGGTAGCTTTTTCGTGGACGTCACATTTATCAGCTAATTGTATTTTATTAGCTAATGATAAAATCGCGCAGGATGAACCCAAAAGGCAATTACCAACGCTTAATAGCGGTGTGACAGATAAATATAAATTGTTTATTGTTGTTGCCAGTGTTGACGATGCTTACCAGCTTGTCAAACAGGTGCCACAAATCAAGTCACTTAATCTAGGTGGTACTAAGGCCGGTGAAAACAAGAAATCCTTATCGGCAGCTATTTTTGTAACTGCTGATGAAGAAGCCAAGTTAAAAGAATTAAGTGATGCCGGAATAGAAATCTATTGCCAGCAGGTACCAACAGAAAAGAAAAAAGAGCTTTTT…
86	AFLO3B81546	NA	NA	NA	IPR004701	PTS_EIIA_man-typ	Phosphotransferase system, mannose-type IIA component	PTHR33799;PTHR33799:SF8	FAMILY NOT NAMED;SUBFAMILY NOT NAMED	NA	NA	NA	NA	NA	PF03610	EIIA-man	PTS system fructose IIA component	NA	NA	NA	NA	NA	PS51096	PTS_EIIA_TYPE_4	PTS_EIIA type-4 domain profile.	NA	NA	SSF53062	PTS system fructose IIA component-like	NA	NA	NA	NA	NA	NA	NA	NA	NA	NA	NA	1	GO:0009401	phosphoenolpyruvate-dependent sugar phosphotransferase system	NA	NA	GO:0016021	integral component of membrane	ATGAAGCGGCATTTAGAATTAGCTTCACATGGACATTTGGCATCCGGGGCATTAAGTGCCTTAAAGATTTTAGTTGGAAATAAAAATAATATTTCGGCAGTGGATTGTTACGTGGATAATTCTTTTGATTTGCAAAAAATGGTGGAAAAAGTCATCAGTGATCATAAAGAAGAGGACTTAATCGTGGTAACAGACTTGTTTGGCGGCAGTGTCAATAACGAATTCATGCAGCATTTGACTGATAACGTCTTTTTGATTGCGGGGATGAATTTGCCATTCTTATTAGAATTAGCAGTCAATTTAGATTCGCCTGTGCCAACTAAAGAAATTATCCAAAATGCACTGAATGCCTCAGCCAAGAGCTTAAAATTTTGCAACGCAATTGACTTGTCCGAGACA…
87	AFLO3B80978	NA	NA	NA	IPR004703	PTS_sugar-sp_permease	Phosphotransferase system, sugar-specific permease component	PTHR37324;PTHR37324:SF3	FAMILY NOT NAMED;SUBFAMILY NOT NAMED	NA	NA	NA	NA	NA	PF03611	EIIC-GAT	PTS system sugar-specific permease component	NA	NA	NA	NA	NA	NA	NA	NA	NA	NA	NA	NA	NA	NA	NA	NA	NA	NA	NA	NA	NA	NA	NA	1	GO:0009401	phosphoenolpyruvate-dependent sugar phosphotransferase system	NA	NA	GO:0016021	integral component of membrane	ATGGCTAATTTGGCTTCACAAATAAATGGAGTTGTTCAATACATCTTAAGTATGGGAGCAATTGTTATGCTTCCCATTATTCTCTTTATTGTTGGTTTGTGCTTTAGAATGAAAGTTGCACAAGCATTTAAAGCTGCCTTAACTGTTGGAGTTGGCTTTGTTGGTATTTTTGCTATTTTCGGCATTTTGACTAACAATGTGGGACCAGCTGCACAAGCAATGGTAAAGCACACCGGTATCAATTTGCCCGCAGCTGATTTAGGCTGGCCTGCATTATCTGCAATTACATGGGGGTTGCCTATTGCTCCTTTGGTTATTCCAATGACAATTATTATTAATATCATAATGCTAGTCATTGGAAAAACAAGAACAGTTGATGTAGATATGTGGAATTATTGG…
88	AFLO3B81313	NA	NA	NA	IPR004704	PTS_IID_man	Phosphotransferase system, mannose/fructose/sorbose family IID component	PTHR32502;PTHR32502:SF19	FAMILY NOT NAMED;N-ACETYLGALACTOSAMINE PERMEASE IID COMPONENT	NA	NA	NA	NA	NA	PF03613	EIID-AGA	PTS system mannose/fructose/sorbose family IID component	NA	NA	NA	NA	NA	PS51108	PTS_EIID	PTS_EIID domain profile.	NA	NA	NA	NA	NA	NA	NA	NA	NA	NA	NA	NA	NA	Y	NA	1	GO:0009401	phosphoenolpyruvate-dependent sugar phosphotransferase system	NA	NA	GO:0016021	integral component of membrane	ATGACCTCAATGATTATGGGAATTTCATCGGCAATGGAAGAACAATATGCTAATAATCCTTCTTCAATGGATCCAGACTCAATTAACTCGGTCAAAGCAGCACTAATGGCTCCTTTATCAGGAATCGGTGATTCATTATTATTCGGAACTTTCCGGGTTATTGCTGCAGGTATCGGAGCATCATTTGCCAAACAAGGTAGTATACTTGGTCCAATTTTATTTTTTGTTTTGTATAATTTGCCAGCAACTCTAATCAGAATTTTTGGCTTGAAATATGGCTATAAATGGGGAGTAGAGTCGCTAGAAGAA
89	AFLO3B81024	NA	NA	NA	IPR005046;IPR011889	DUF285;Liste_lipo_26	Protein of unknown function DUF285;Bacterial surface protein 26-residue repeat	NA	NA	NA	NA	NA	NA	NA	PF03382	DUF285	Mycoplasma protein of unknown function, DUF285	NA	NA	NA	NA	NA	NA	NA	NA	NA	NA	SSF52047	RNI-like	TIGR02167	Liste_lipo_26	bacterial surface protein 26-residue repeat	NA	NA	NA	NA	NA	NA	NA	NA	1	NA	NA	NA	NA	NA	NA	ATTAAATTACCAAGAAATTCTAGCCTTTTGTTTGGTAGATTATACAAGCTGCAAGATATTAGCGGTCTTGATAAAGTAGATACCGGTGATGTTGATAGTTTTGAGAAATTATTTTATAAAGATAAAAGTTTACAAAGCTTAGATTTGAGTTCATGGGACATAAGTTCTATAGGCTATGCTGGAGCTAGCGAAATGTTTTCCGGCGCAAAGTCATTAACTCAGATTAATCTAACCAATTGGGATGATATCCCAGATACTGACATGTTTTCTGGTCTTGATACCACCAAAGTCAAGATTATCGGCTTTGATGTTGATGAAGATTAA
90	AFLO3B83029	NA	NA	NA	IPR005135	Endo/exonuclease/phosphatase	Endonuclease/exonuclease/phosphatase	NA	NA	NA	NA	NA	NA	NA	NA	NA	NA	NA	NA	NA	NA	NA	NA	NA	NA	NA	NA	SSF56219	DNase I-like	NA	NA	NA	NA	NA	NA	NA	NA	NA	NA	NA	1	NA	NA	NA	NA	NA	NA	ATGACTGGCTCTTCTAACAGAATTCGATTTATTCCTGAGAGAAAACAATGTTGGAATTATTCTAGGAAACCTATTTTAACCTGCGAATTGAAATCTCCTTATCAAATTGCAATATTATCAGGCACGATCGCAAGGATAGCAGCTCCAGGACAGAGATTAGCCATCCTAATACACAAAAGCTTCCAATTCTATCTAGTCCCATTGGATCTTCCCGATAACATCGAGACAGTGGCAGCAAAGACAGTTTCACTTAACCTAACAGCCGTTTCAGCCTATTATCTTCACGAAAACCTGATAGCATTGGACGTGATCACTGAATTTGATGGATCGTTCATCTCGGGAGGTGATTTAAATGCCAAACATCCAAACTGGAATAATTTTCATTCTAATTACAATGAC…
91	AFLO3B83182	NA	NA	NA	IPR005312	DUF1759	Protein of unknown function DUF1759	NA	NA	NA	NA	NA	NA	NA	PF03564	DUF1759	Protein of unknown function (DUF1759)	NA	NA	NA	NA	NA	NA	NA	NA	NA	NA	NA	NA	NA	NA	NA	NA	NA	NA	NA	NA	NA	NA	NA	1	NA	NA	NA	NA	NA	NA	ATGAGGCCGCATGGGAGTTCGTGCAACTACGATGAAACTAATGCCATCGTAAGGCATCATTTATCACGATTGTTCAAGCTTCCCGCGATGCAATCATGGTCGGCAGTGGATCTGCGACGGCTCTTTAACGAATGTACTGCCCAGCTTCAGGCATTAGAATCACTGGGGGTTCAGGTCAAAAACTGGGACCCTATGATCATATATTTCCTGGAGAGCAAGTTTCACTCGCAAATAACTGAGAGCTGGGTGCAGGACACGGCCAACCTGGATCATCTGGCGATCCTTTCGGACATGTGGCCGTTTCTCAAGTAA
92	AFLO3B81149	NA	NA	NA	IPR005829;IPR011701;IPR020846	Sugar_transporter_CS;MFS;MFS_dom	Sugar transporter, conserved site;Major facilitator superfamily;Major facilitator superfamily domain	NA	NA	NA	NA	NA	NA	NA	PF07690	MFS_1	Major Facilitator Superfamily	NA	NA	PS00217	SUGAR_TRANSPORT_2	Sugar transport proteins signature 2.	PS50850	MFS	Major facilitator superfamily (MFS) profile.	NA	NA	SSF103473	MFS general substrate transporter	NA	NA	NA	NA	NA	NA	NA	NA	NA	NA	NA	1	GO:0055085	transmembrane transport	GO:0005215	transporter activity	GO:0016021	integral component of membrane	ATGAAGGTAACTTTGATGACTAAAAGACAAATTTTAAAGGCAATAGGTATATTGAGTATGAACTTGCTGTTAATGTTGGGTACAGCTGTCACGTCAGCAATTGCAGCAATAGCAAGGTCATTTTCTACAGAACCCATTTCTAAAGTACAACTGTTAGGTTCAATACCACAACTTGGTCAAATTATTTCTACAATATTTTTTGCATATTTAACTTTTAAAATGACCCGTAAAAATCTAGGTTTAATGGCGATTTTATTTGTGACAATTGGTGGCTTAATTCCGGCAATTTATAGTAGCAGTCTTAACTTGATTTTAGCCTGCATGGTCCTAGTTGGCTTTGGCACAGGGACTATTACTAATGTTGTACCAGTTTTATTGCAGGAGAATTTTACAGGAGAA…
93	AFLO3B80954	NA	NA	NA	IPR006047;IPR017853	Glyco_hydro_13_cat_dom;Glycoside_hydrolase_SF	Glycosyl hydrolase, family 13, catalytic domain;Glycoside hydrolase superfamily	NA	NA	NA	NA	NA	NA	NA	PF00128	Alpha-amylase	Alpha amylase, catalytic domain	NA	NA	NA	NA	NA	NA	NA	NA	NA	NA	SSF51445	(Trans)glycosidases	NA	NA	NA	NA	NA	NA	NA	NA	NA	NA	NA	2	GO:0005975	carbohydrate metabolic process	GO:0003824	catalytic activity	NA	NA	ATGCCCGATTTAAACTGGGCAAATCCGGCACTTAGACAGGAAATGATCCAAGTTGCTGAATATTGGCTGGCTAAGGAATTGACGGCTGACTTGCGTCAAAATTTTCCGGCACCAAATGATGCTGAACCAGTTATTGCGGAACCGTTTTTTGCTAACTTGCCCCAAGTGCAAGAGTGGCTGCAACCATTTTGTCAGCAAATAAAGCGTGACTTTCCTGACGCCTTGCTTTTGGGCGAAGCAGCAAGTGCAAACGTGAACTTAGCAGCCGATTATACAAGTAAGAGAAATAGTTTGCTAGATAGTGTGATTACTTTTCGCTATTTCACGGATGATGAGAGCAAAATTAATCCGCGTTTACCAGCGCAATATCAGCCAAAAGAGCTTGACTGGCAAATCTTC…
94	AFLO3B81800	NA	NA	NA	IPR006524	Transcrpt_activ_ArpU	Transcription activator, ArpU family	NA	NA	NA	NA	NA	NA	NA	NA	NA	NA	NA	NA	NA	NA	NA	NA	NA	NA	NA	NA	NA	NA	TIGR01637	phage_arpU	phage transcriptional regulator, ArpU family	NA	NA	NA	NA	NA	NA	NA	NA	2	NA	NA	NA	NA	NA	NA	ATGGATCTGTTAAAAACGTTCCAGAAAGTAACCGAATTTTGCAAAAAAATAAGAAAAATCATAGGTTTCAGTACACATCGTAATAGCAAGCAAGCTGAATACCAAGATGATATTAGAGAATTAATCAATCAAGGTTTTACCATCCGTGAAATCGCAATGAAATTAGCAATTGGCGAGACAACTGTAGTTAATGTCACCAAAAAGAATCACTATCATGTGAAGCCTAGGTTTCGGTATAAGCTAATTAATAGAAGGATTAATGCTGAAATATATGTTAATAATCAAAAAACAATTTCAAAAATAATCAGGCATAAGTGTTATTCGCTCGATGAAATTAGAAACTATGCTGCAATTGAGGGCTACCAATTCATAGACAATGACAATATGTTTCTCTGGAAA…
95	AFLO3B82571	NA	NA	NA	IPR007119	Phage_minor_struct_N	Phage minor structural protein, N-terminal domain	NA	NA	NA	NA	NA	NA	NA	NA	NA	NA	NA	NA	NA	NA	NA	NA	NA	NA	NA	NA	NA	NA	TIGR01665	put_anti_recept	phage minor structural protein, N-terminal region	NA	NA	NA	NA	NA	NA	NA	NA	2	NA	NA	NA	NA	NA	NA	ATGCAAACACCACCAACAATTAATTGGGACCCTAATCAATTGAATTATGGAACTGGTCAGTTGTCGTTCTACTGTGAGCCATTCCAGTACCGCGTTGACGGGATTAATTACATTAATCTGCCAGATAATGGCATTGTTTATAATTCAGAATCGCGCGTTGCTGTTCCTAATTGGCATTTTGTTGCTAAGGGTTCGTTTGTTTTAAATGTTAATGATTTAAATTATCAGTTTGACAATATGAGCGGTGAGTTCTGGCTTAATGGCGATACCGGGGACACTTATGACAAAGATAATAACTTATTCAATAATCAAACACATTTTCCTAATTTATTACCGCCAGAATTACCAAGCGGCGAAAATAAGATTTCAATTACGGCAGATGATGGCATTCCAGAAACT…
96	AFLO3B81267	NA	NA	NA	IPR007737;IPR011991;IPR013196	Mga_HTH;WHTH_DNA-bd_dom;HTH_11	Mga helix-turn-helix domain;Winged helix-turn-helix DNA-binding domain;Helix-turn-helix, type 11	PTHR30185;PTHR30185:SF8	CRYPTIC BETA-GLUCOSIDE BGL OPERON ANTITERMINATOR;FRV OPERON REGULATORY PROTEIN-RELATED	NA	NA	NA	NA	NA	PF05043;PF08279	Mga;HTH_11	Mga helix-turn-helix domain;HTH domain	NA	NA	NA	NA	NA	NA	NA	NA	NA	NA	SSF46785	&quot;Winged helix&quot; DNA-binding domain	NA	NA	NA	NA	NA	NA	NA	NA	NA	NA	NA	1	NA	NA	NA	NA	NA	NA	ATGCTAAACATCAAAAGACAAATTCTAATTGCTTTACTTAATCAAAAAAAGGGATTGAGAAGCAGTGATCTAGCACAGCAACTAGATGTCACGCCAAGAACAATTAGAAATAATATTACAGAGTTAAACCGGTCTTTGCAGGGAAAGGTAATTGGTTACCGCAGACCATTTTTCTACATAAGTAATCCAGAACTTGTAAGAAGACACATTTTTATCAAGGATAATCAATTACACTATCCAAATTACCCGTCTGATAGGCCATTTTTAATCTATTTACAATTATATAATCAACCAAAAGTTAAAATTCAGGAAATATCTTCAAAGCTTCACATTGGAAGAAACGAAATTGAAAATTCAATCAAAGGTTTAAAAAGGCTTTGTTGCCAATATCATCTTAAA…
97	AFLO3B81603	NA	NA	NA	IPR007936	VirE	Virulence-associated E	PTHR34985;PTHR34985:SF2	FAMILY NOT NAMED;SUBFAMILY NOT NAMED	NA	NA	NA	NA	NA	PF05272	VirE	Virulence-associated protein E	NA	NA	NA	NA	NA	NA	NA	NA	NA	NA	NA	NA	NA	NA	NA	NA	NA	NA	NA	NA	NA	NA	NA	1	NA	NA	NA	NA	NA	NA	ACCCTAATCTGAAAAATCTCTTTCGGTTGAATGAATTTACGACTGAAGTAGATGTGGTAGAAACAGCAGAAATCAAGCTTCCAGAGATTGGTAAAACAATAATTCCAAAAGGGCAATACACTGATCAGGTCACTAATTCAATCGAACTTTATATTGAATCGCAATCAAAATATGGTAATGCGAATTTTAAAAATGCCATCATTGAACAAGCAGTCGACAATGTGGCGTACATGCATTCTTACAATCCTTTGATTGACTACATGAATGACGTTTATAAGAAATGGGATAAAAAACGAAGATTAGATAATTTTTTCGTGGATTATCTCGGCGCTGATAAAAATGAAACTACCACATTAATTACGCGAGTGTTCTTCATGGGTGCAGTGGCCAAAGTTTATA…
98	AFLO3B80976	NA	NA	NA	IPR008902	Bac_rhamnosid	Bacterial alpha-L-rhamnosidase	PTHR33307	FAMILY NOT NAMED	NA	NA	NA	NA	NA	PF05592	Bac_rhamnosid	Bacterial alpha-L-rhamnosidase	NA	NA	NA	NA	NA	NA	NA	NA	NA	NA	NA	NA	NA	NA	NA	NA	NA	NA	NA	NA	NA	NA	NA	1	NA	NA	NA	NA	NA	NA	ATGCTGCAATTTTTGCAAAAAACGGCTAGTTATAATATGGATACATTTGAATTTTTTAAGAAATTTTCTAAAGATATTGCAATTGAGCAAAATCTTCAAAGTGGGAGAGTTCCATTGTATGTACCTAGGGTTGACACTGATGATGGTGGCAAGGCTGTATGGAGCGATGCAGCTACTTTGATTCCATGGATTAGTTATCAAAGAAGTATGGATTTAGCCATTTTGAGACAAAACTTCGATTCAATGATGTCTTGGGTTGATTGGATTCATGACAGAGCAAAAAGTCAAGGTAATGAATATCTTTGGCTTAATGATGATCAGTTAGGCGACTGGCTGGCTTTAGATACCGAAGACATCATGA
99	AFLO3B81235	NA	NA	NA	IPR008902;IPR008928	Bac_rhamnosid;6-hairpin_glycosidase-like	Bacterial alpha-L-rhamnosidase;Six-hairpin glycosidase-like	PTHR33307	FAMILY NOT NAMED	NA	NA	NA	NA	NA	PF05592	Bac_rhamnosid	Bacterial alpha-L-rhamnosidase	NA	NA	NA	NA	NA	NA	NA	NA	NA	NA	SSF48208	Six-hairpin glycosidases	NA	NA	NA	NA	NA	NA	NA	NA	NA	NA	NA	1	NA	NA	GO:0003824	catalytic activity	NA	NA	GATTATCCAAGTTGGCTTTATGAAGTAAAGCACGGAGCAACAACAATTTGGGAACGTTGGAATTCAATTGATAAAAATGGTCATATTGCTGATAATGGAATGAATTCATTAAATCATTATTCTAATGGTGCGGTGATGTCTTGGGCCTATGAAAGTTTGCTAGGACTAAAACAAGAAGGTTATAACGTAATATTTAAACCTTTTATAGCACCACAGTTTTTAAAAGTATCCGGTCAAATTATGCTTCCTACAGGTCTAGTCAAAGTGAGTTGGAAAATAAGGGATACAAGACATGTACAATTTCAAATTAGTGTTCCTTTTGGCAGTAAATTACAAATTAAAATTAAAAATTAA
100	AFLO3B81408	NA	NA	NA	IPR008927;IPR013118	6-PGluconate_DH_C-like;Mannitol_DH_C	6-phosphogluconate dehydrogenase C-terminal domain-like;Mannitol dehydrogenase, C-terminal	PTHR43362;PTHR43362:SF1	FAMILY NOT NAMED;SUBFAMILY NOT NAMED	NA	NA	NA	NA	NA	PF08125	Mannitol_dh_C	Mannitol dehydrogenase C-terminal domain	NA	NA	NA	NA	NA	NA	NA	NA	NA	NA	SSF48179	6-phosphogluconate dehydrogenase C-terminal domain-like	NA	NA	NA	NA	NA	NA	NA	NA	NA	NA	NA	1	GO:0055114	oxidation-reduction process	GO:0016491 GO:0050662	oxidoreductase activity;coenzyme binding	NA	NA	ATGACTGACCAGCAAACAGTAAATGATGCGGACCAAATGAAGGTAACTGCTTGTTTAAACCCGTTGCATACCTCTTTAGCAATCTTAGGGTGTCTATTAGGGTATGACACAATTGCAACGGAAATGCAGGATGAAGATTTGAAACGCTTTATTGTCAATTTAGGCTACGGAGAAGACTTGCCAGTCGTGCGTGATCCGCAAATTATTAATCCTCGCAAATTTATTAGTGAATTAATCACTAAGCGGCTGCCGAACAAAAACATTCCTGATACACCGCAAAGAATTGCTAGTGATACTTCACAAAAAATCGCGATTAGATTTGGTGTAACTATTCAGCATTATGTTACCAATCCGAATTTAGATGTTAAGCAATTACGTTTTATTCCATTTATATTAGCA…
101	AFLO3B81694	NA	NA	NA	IPR008927;IPR013118;IPR016040	6-PGluconate_DH_C-like;Mannitol_DH_C;NAD(P)-bd_dom	6-phosphogluconate dehydrogenase C-terminal domain-like;Mannitol dehydrogenase, C-terminal;NAD(P)-binding domain	PTHR43362;PTHR43362:SF1	FAMILY NOT NAMED;SUBFAMILY NOT NAMED	NA	NA	NA	NA	NA	PF08125	Mannitol_dh_C	Mannitol dehydrogenase C-terminal domain	NA	NA	NA	NA	NA	NA	NA	NA	NA	NA	SSF48179;SSF51735	6-phosphogluconate dehydrogenase C-terminal domain-like;NAD(P)-binding Rossmann-fold domains	NA	NA	NA	NA	NA	NA	NA	NA	NA	NA	NA	2	GO:0055114	oxidation-reduction process	GO:0016491 GO:0050662	oxidoreductase activity;coenzyme binding	NA	NA	ATGAACAGTGATGGTAGCTTGGAAAAAGAACTTTTGGCTAGTGTTGGTGAAGCTGTTTACTTTAATCAAGCCAGCGAAAAAGGCTGGAACCGGCTAACTGAAATTTTTACCAAACCATCCCTGCAATTTGCTACTTTCTCAATTACCGAGAAAGGTTACACTCTAACTGATGTTAGTGGAGCGCTAACTCAGGCTGCTAAGGAAGATATTCAAAATGGACCTGAAAAGCCTAAAACAAATATGGGGGCTATTGCTCACCTGCTTTATGCTAGATACAATGCAGGCAAATTACCAATTGCAATGGTTTCAACTGATAACTTTTCGCAAAACGGATTAAAGTTAGAAACAGAAGTCTTGCGCGTTGCTGAAGGTTGGCTTAAAAACGGCTTTGTTGACCAG…
102	AFLO3B81035	NA	NA	NA	IPR008928	6-hairpin_glycosidase-like	Six-hairpin glycosidase-like	PTHR34987	FAMILY NOT NAMED	NA	NA	NA	NA	NA	NA	NA	NA	NA	NA	NA	NA	NA	NA	NA	NA	NA	NA	SSF48208	Six-hairpin glycosidases	NA	NA	NA	NA	NA	NA	NA	NA	NA	NA	NA	2	NA	NA	GO:0003824	catalytic activity	NA	NA	ATGCAAGATGTCTTTGAAGATGGACCTAAGCGTGACCGCCGTTTATGGTTAGGCGATCTGCGACTGCAGGCACTAGCTAATTATGCTTCATTTGATAATACTGCTCTACTTATTTTTCATTTCAACTTTAGCCGATTGGAAAAACACGAAAAAGATGAAGAGCTTTTGACTGATCTTTATCCAATTGCTAAAAAGCAGTGGGAATACACCCGCAGATTTATTCGGGATAATGGTGAAGTAGTACCAGATCAGCAGTATGTTACCTTTGTTGACTGGTCAAATGACTTTGACAAAACAACTGCTGGGCAAGCTATTACCATCTATGTCTTGCGCCAATTAATTGCTTTAGCAAAAATGACAAATGATCCTGAATTAGCTAAGTACAAACAAGAACTTGAA…
103	AFLO3B80068	NA	NA	NA	IPR008979;IPR029411	Galactose-bd-like;RG-lyase_III	Galactose-binding domain-like;Rhamnogalacturonan lyase, domain III	NA	NA	NA	NA	NA	NA	NA	PF14683	CBM-like	Polysaccharide lyase family 4, domain III	NA	NA	NA	NA	NA	NA	NA	NA	NA	NA	SSF49785	Galactose-binding domain-like	NA	NA	NA	NA	NA	NA	NA	NA	NA	NA	NA	1	NA	NA	NA	NA	NA	NA	ATGTTGCGCAATAGTATTTGGCGAATTTTAGTGCCAGCAAACTTAGATTATTGCATTAATCATTATGATGCTGAACAAGATTGGTTTGCTATTCAAAGCAATAAGGGCGAATGGCGCATACACTTTAATCTGGCATTATCAAAAACAGCTCATTATAAATTATTGATAGCATTAGCAGGTGCAAGTAAGACCAGTGCTATTGATGAAAATGATAGAGGTCATGGCGATCCTTTCATTGAAATTAAGATAAATGGCAATAGTTTGACTAAGAATATTGTTAGATGA
104	AFLO3B80039	NA	NA	NA	IPR009057	Homeobox-like	Homeobox domain-like	NA	NA	NA	NA	NA	NA	NA	NA	NA	NA	NA	NA	NA	NA	NA	NA	NA	NA	NA	NA	SSF46689	Homeodomain-like	NA	NA	NA	NA	NA	NA	NA	NA	NA	NA	NA	1	NA	NA	GO:0003677	DNA binding	NA	NA	ATGCGTTCACAAATCATTTCTTTATGGAAAGAAAGGTATTCTGTAAAAAAAATTGCAGAAAAAGTAGAAGTTTTAAAATCCTGTGTGAGCTACAATATTAAAAAATACGGAATTTGTTCTTCTGTGAAAAGATCTGGAATACCTGGAAAAACGATTGAGACAGAAGATCGTCATATTATCATCGTCATTATAACTATAAGCAAAAGAAATAAGAGGGAGACAGCTTCCGAAATAGCTGCAGAAATTAATGGATGTGTCCCATCCAGGAACACAGTAATTTCAGTTTCAACAGTAAAAAGGCGTCTTACGAAGGCGGTCTCAGAGTGTTGCGGTTAA
105	AFLO3B81843	NA	NA	NA	IPR009057;IPR018060	Homeobox-like;HTH_AraC	Homeobox domain-like;DNA binding HTH domain, AraC-type	PTHR11019	THIJ/PFPI	NA	NA	NA	NA	NA	PF12833	HTH_18	Helix-turn-helix domain	NA	NA	NA	NA	NA	PS01124	HTH_ARAC_FAMILY_2	Bacterial regulatory proteins, araC family DNA-binding domain profile.	SM00342	aracneu4	SSF46689	Homeodomain-like	NA	NA	NA	NA	NA	NA	NA	NA	NA	NA	NA	1	GO:0006355	regulation of transcription, DNA-templated	GO:0003677 GO:0003700 GO:0043565	DNA binding;transcription factor activity, sequence-specific DNA binding;sequence-specific DNA binding	NA	NA	GAAATTGAGTATTGTGATGGCAACTGCTCTCTAAATGAACTAGCAGATAAATTTCACTTTTCAACCAGTACAATTTATAAATTATTGATGAATACAACTGGTAAAAACTTTACACAAATTAAAATTAGTGCACAGTTAGAAAAAGCAAAGTTACTTTTAAAAGAAACATCAATGTCAATTACAGATATTATGTTAAATGTAGGTATAAAGAATACTACTTTCTTCTATAATAAATTTTATAAAGAATTTGGTGAAACACCTAAGCAGTTCAGGCAAAAGAATAAATCAATTGAAATATAG
106	AFLO3B81876	NA	NA	NA	IPR009308;IPR013022	Rhamnose_isomerase;Xyl_isomerase-like_TIM-brl	Rhamnose isomerase;Xylose isomerase-like, TIM barrel domain	PTHR30268	L-RHAMNOSE ISOMERASE	NA	NA	NA	NA	NA	PF06134	RhaA	L-rhamnose isomerase (RhaA)	PD042532	ISOMERASE L-RHAMNOSE METAL-BINDING METABOLISM RHAMNOSE MANGANESE ENZYME KINASE 3D-STRUCTURE RHAA/RHAB	NA	NA	NA	NA	NA	NA	NA	NA	SSF51658	Xylose isomerase-like	NA	NA	NA	00051+5.3.1.14	Fructose and mannose metabolism	NA	NA	NA	NA	NA	NA	1	GO:0019299	rhamnose metabolic process	GO:0008740 GO:0030145	L-rhamnose isomerase activity;manganese ion binding	NA	NA	GTTGGTAAAAATGCTCGTGCTATTTCTAATTATTTTGGTGAAGAGCAAGGTGCTCAATCTGTTGATAACTTCTGGATTATGGATGGAATGAAGGATGAGCCAATCAGCAGATTGGATCCTCGTGAACGTCTAATTGAATCTTTGGATGAAATCAACAAAGAAAAATACGATGAAAAGAACACAATAGAATCATATGAAGGTAAGCTGTTTGGTACGGGTGTTGAAAGCTATACTGTTGGTTCACACTTCTTCTATGACAATTACGCTTTGACTAGAAATAAGTTCTGGTGCATGGACATTGGCCACTTCCACGAAGCTGAAGATCCATCAGATTACCTATCAGCATTCTTGGCATTTGGCAAAGGCATGTTCTTACACATTACACGTCCAGTTCACTGG…
107	AFLO3B81812	NA	NA	NA	IPR010090	Phage_tape_meas	Phage tail tape measure protein	NA	NA	NA	NA	NA	NA	NA	PF10145	PhageMin_Tail	Phage-related minor tail protein	NA	NA	NA	NA	NA	NA	NA	NA	NA	NA	NA	NA	TIGR01760	tape_meas_TP901	phage tail tape measure protein, TP901 family, core region	NA	NA	NA	NA	NA	NA	NA	NA	2	NA	NA	NA	NA	NA	NA	ATGCAGGTTACTACTTCTGTGCTTGAAGCTTTTGGCATGAGGACCAATTCAACCGCTGGTATGTTGCGTAACACGCGTATAGTTGCGAATAAATTAGCGATGGCTGCAGATGCAACGGCGACTGATTTCAAATCACTTGGATTGACAGCTGGTAGGTCATTGACTGATACAGCTAGTGCAATGGGTGTTCTCTCAAACGCTGGATTAGAAGCTCAACAAGCTGGTACTGGCTTGCGAAAAATTTTGATTAGTTTGCAGACGCCTTCTAAATCAGGTGCGAATGCGCTAGAAAAGTATGGCATGTCGGTTTCTGATTTCAAGGATAAAGCTGGAAAGCTTAAGCCGATTTCTACTATTTTTAAAGAAATATCAGATCATGTTCCTAAAGCTGATCGGTCT…
108	AFLO3B80067	NA	NA	NA	IPR011013;IPR013784;IPR029413	Gal_mutarotase_SF_dom;Carb-bd-like_fold;RG-lyase_II	Galactose mutarotase-like domain;Carbohydrate-binding-like fold;Rhamnogalacturonan lyase, domain II	PTHR32018;PTHR32018:SF15	FAMILY NOT NAMED;F21M12.27 PROTEIN-RELATED	NA	NA	NA	NA	NA	PF14686	fn3_3	Polysaccharide lyase family 4, domain II	NA	NA	NA	NA	NA	NA	NA	NA	NA	NA	SSF49452;SSF74650	Starch-binding domain-like;Galactose mutarotase-like	NA	NA	NA	NA	NA	NA	NA	NA	NA	NA	NA	1	GO:0005975	carbohydrate metabolic process	GO:0003824 GO:0030246	catalytic activity;carbohydrate binding	NA	NA	ATGAAATTAGAAAAATATGCTGATGGTTATCTGTTAAAAAATGCCCAACTTGAACTTTGGTTAAATAAAGCCGGACATGCCGATAAGTTATTGTATAAAGGTCAAAACTTAATCGGTAATTTAGCTGGAAATGTTATTGACCCAGATCGTCAGCACTCATTCTACTTGGATTATCATCAAGATTTAAAGTCTACACATCCGCAATATACCGAATTCAAAGTCTTACGCAATGATGATCATTTTATTCACCTAGCTTGGATAGATAACAAGAGCGCGTTGAATCTTGAGTATCACATAATTATTAATTCAAGTGATAGCAAAATCTACTCCTATGTCATAGCTAGAAATAGAACTAAAGAAACCTATCAGATTAATGAGTTGCGAACCGTTTATCGGCTA…
109	AFLO3B81329	NA	NA	NA	IPR011051;IPR021120	RmlC_Cupin;KduI/IolB_isomerase	RmlC-like cupin domain;KduI/IolB isomerase	PTHR38461	FAMILY NOT NAMED	NA	NA	NA	NA	NA	PF04962	KduI	KduI/IolB family	NA	NA	NA	NA	NA	NA	NA	NA	NA	NA	SSF51182	RmlC-like cupins	NA	NA	NA	00040+5.3.1.17	Pentose and glucuronate interconversions	PWY-6507	4-deoxy-L-threo-hex-4-enopyranuronate degradation	NA	NA	NA	NA	2	NA	NA	GO:0016861	intramolecular oxidoreductase activity, interconverting aldoses and ketoses	NA	NA	ATGGACAAAAAAGACCATATGGTCAAACAAGATGGTTATTACATTGGTCAAGGTGCTAAGCAAGTAACTTTTACCTCTGATGATGCTAATAATCCGGCCAAATTTTATGTGGTTTCTACTCCTGCTCATACTCACTACCCCGATAAAAAATACCTACAAACTTGTCAACTTCAAATGGGCTATACAGTTCTGGAGCAAGGCTCAGGTTGGAATACAATGCCTGCCCACACTCATGCCAGAAGAATGGAGACTTACATGTACTTTGACTTTAGTGATCCTGATATGCGTGTTTTCCACATTATGGGTAGACCTGGTGAGACCCGCCATTTAGTTATTCAAAATGAACAGGCAATCCCTAACCCGAGTTGGGCAATTCACTGCGGTATCGGTACTGGAAGT…
110	AFLO3B81047	NA	NA	NA	IPR011439	DUF1542	Domain of unknown function DUF1542	NA	NA	NA	NA	NA	NA	NA	PF07564	DUF1542	Domain of Unknown Function (DUF1542)	NA	NA	NA	NA	NA	NA	NA	NA	NA	NA	NA	NA	NA	NA	NA	NA	NA	NA	NA	NA	NA	NA	NA	1	NA	NA	NA	NA	NA	NA	ACTGAGATTGCCGCTGATAAGAACTTATCCCAAGTCGAAAAAGACGGCTATACAGATCAAGTTGATCAAGCTTTAGCTAATGCTAAGAATAAAATCAACGCTGCCACAACTACAGATGAAGTTACAAAGAATGAGGCTGCGGGTAAAGCAAATATAACCCAAGTTGAAAATGATGCATCACTTCAATCTGCTAAAGATCTAGGCTTAGCAGATATTCAGAAGGCCAAGAAGGACGCTCTTGATCAAGTTAAGAAATTAACTAATGTTGATGAAGATACCAAGAATCAGCTAAATAGTGAAATAAATGATGCTTATGATGCAGCTAAAGACAAGATTGAAAGTCCCGATCCAGCAACAGCAGACCAAGTTAATAAGAACGCTCAAGAAGGCGTGACAAAC…
111	AFLO3B81228	NA	NA	NA	IPR011439	DUF1542	Domain of unknown function DUF1542	NA	NA	NA	NA	NA	NA	NA	PF07564	DUF1542	Domain of Unknown Function (DUF1542)	NA	NA	NA	NA	NA	NA	NA	NA	NA	NA	NA	NA	NA	NA	NA	NA	NA	NA	NA	NA	NA	NA	NA	1	NA	NA	NA	NA	NA	NA	GCAATAACTGAGCTCAATAACATTGCCGATCAGGCGCACAATAATCATGATGTAGGTGAAGATGATCAGAATGCAATTGAGCAGAGCCTAAAAGATGCAATAGCAACTATCAATCAAGCCACTGATGTCAATTCGGTTGATGCTGCTAAGTCAGCTGGTGAGAAGGCGCTTAATGGTATTGTAGCCCAAGCCAAAGATTCGGCACTGAAAAATGAAAAAGTGGCAGCTAGGGATGACCTGACTAAACAGGCCGGTAAACTCAAAGATCAAATTAGTCAATCGTGGCAAAATCATTTGATTGATCAAACACAATATGATCGCTTAACCAATCAAGTTAACGAAGCACTTACAGCTATCAATTTGGCTCTTGATGGTGCAGGCAGTATTGATGAA
112	AFLO3B81230	NA	NA	NA	IPR011439	DUF1542	Domain of unknown function DUF1542	NA	NA	NA	NA	NA	NA	NA	PF07564	DUF1542	Domain of Unknown Function (DUF1542)	NA	NA	NA	NA	NA	NA	NA	NA	NA	NA	NA	NA	NA	NA	NA	NA	NA	NA	NA	NA	NA	NA	NA	1	NA	NA	NA	NA	NA	NA	GATGCTGCAACTAATGCAAAAGCACAGATTGATCAGAATAACGACTTAACTGCTGCGCAAAAAACTAAATATGAAGGTGATATTAGTACTTTAGTTAGCGAAGGAACGCAAGCTGTTAAGAATGCTAAAAGTGCAGATATTGATACTACCGCACAGGAATATATTGATCAAATTAATAATGTTCCGAAAACAGCTGGAAGCGATGTATTAGATGCCCAACGTGATACTGCCAAACAAGCAGTTGAAGCCGCCGCCAAAAAGCAA
113	AFLO3B81344	NA	NA	NA	IPR011439	DUF1542	Domain of unknown function DUF1542	NA	NA	NA	NA	NA	NA	NA	PF07564	DUF1542	Domain of Unknown Function (DUF1542)	NA	NA	NA	NA	NA	NA	NA	NA	NA	NA	NA	NA	NA	NA	NA	NA	NA	NA	NA	NA	NA	NA	NA	1	NA	NA	NA	NA	NA	NA	GGTGAAATCGATGCTGATCCAACTTTAACCAATAAGCAAAAAGCCGATCAAAAGGCTAAAGTCGATACTGATGCCGCTACAGCTAAGGACAATATTGATAAGGCGACAGATGCTCAAGGCGTAATTGATGCTCATGATAATGGTGTCAACCAAATAAGAGCAGATCACCAATCAAATAAGACTTCATTAGCCGATCAAAAGCAAGTAGCTAAGGATCGAATTGATCAAGAAGCTATTAAAGTTAAGGGTGACATTGATGCCGATCCAACTTTAAACAGTAAGGAAAAGACTGAGCAAAAGGCTAAAGTTGATAGTGATGCTCAAGCAGCTAAAAACAATATTGATGATGCACTGGATGCACAAGGTATAGTTGATGCTCGTGATAAGGGTATTGCTCAA…
114	AFLO3B81445	NA	NA	NA	IPR011439	DUF1542	Domain of unknown function DUF1542	NA	NA	NA	NA	NA	NA	NA	PF07564	DUF1542	Domain of Unknown Function (DUF1542)	NA	NA	NA	NA	NA	NA	NA	NA	NA	NA	NA	NA	NA	NA	NA	NA	NA	NA	NA	NA	NA	NA	NA	1	NA	NA	NA	NA	NA	NA	GTTGACAAAGATGACTCGAAGTCAGCTAACGAGAAAGATAAAGAAAAGAAAGCGATTGCTGATGCTGCAGCAGAAGCAAAAGATGCAATTAATAGAGCAAAAGGAGCTGAAGGTGTTAATAAAGCCAAGGTAGACGGTATTGCAAAAATTGAGGCTGCACAAAAACCAGTCATTACTCTTGCTGATCAAAAGAAAACAGCAAAAGATGCAATTGATGATGCTGCTAATAAGGCCAAGAATAAGATTTCTCAAGATCTAGGATTAACTAATGATGAAAAAGCTACTGCTAATAAAGAGATTGATAGTCTAGCAGATGATGCTAAAAATAATATTGATCAGGCAACAAATATTGATGAAGTTGAAAAAGCAGAGGCTGAAGGAACTGCGAATATAACCCAG…
115	AFLO3B81474	NA	NA	NA	IPR011439	DUF1542	Domain of unknown function DUF1542	NA	NA	NA	NA	NA	NA	NA	PF07564	DUF1542	Domain of Unknown Function (DUF1542)	NA	NA	NA	NA	NA	NA	NA	NA	NA	NA	NA	NA	NA	NA	NA	NA	NA	NA	NA	NA	NA	NA	NA	2	NA	NA	NA	NA	NA	NA	GCTAATGTTGATCGTGATGCTGAAACTGCTAAAAATGCAATTGATGCCGCATTTAATGCTCAAGCGGTAATTAATGCAACAAACGAAGGTATCATTGCTATTGATGATGATCATGAACCAAGCAATACTTCACTAGCTGATCAAAAGCAAAATGCTAAAGATCGGATTGATGAAGAAGCAAACAAGATTAAAGGTTGGATTAATAAAGACCCATCATTAGATGACAAGACTAAGGCTGATCAAATTGCTGAAGTAGATGCAACTGCAAGCAAAGCCAAAGACAATATTGATGCCGCAGTTACTGCTCAAGGAATTAAGCATGCACGTGATAAAGATGAAGCTGAAATTGTCAAGGAAGAAATCAATAGTGATCCTGTTCTTGACACTAATACTAAGGCT…
116	AFLO3B81530	NA	NA	NA	IPR011527	ABC1_TM_dom	ABC transporter type 1, transmembrane domain	NA	NA	NA	NA	NA	NA	NA	NA	NA	NA	NA	NA	NA	NA	NA	NA	NA	NA	NA	NA	SSF90123	ABC transporter transmembrane region	NA	NA	NA	NA	NA	NA	NA	NA	NA	NA	NA	1	GO:0006810 GO:0055085	transport;transmembrane transport	GO:0005524 GO:0042626	ATP binding;ATPase activity, coupled to transmembrane movement of substances	GO:0016021	integral component of membrane	ATGTCAATACAGCAATTAATTAAGCAAAACAAAGTACGAATAGCAATAATAATAGTTTATATATGCGTAGGTGCTATATTAATAGCAGCAGGTAACGCATTACTTGCGCCCGGTGGTGATGCGCTAAAAAACGGCAAACTATTAACATTTTTGTCAATGGAGCTTTTATCAGCATGCTTAATAATAAGTGGCGGTGTAATTAGATACTTTTCCAACTACTTATATGCTAAACAACAACAAGAATATATTCATACCATAAGAAGTAAATTAGTGAAAAGTTATTGGCATGAACCAGCGCAATATAAAAATATCTAA
117	AFLO3B81119	NA	NA	NA	IPR011608	PRD	PRD domain	NA	NA	NA	NA	NA	NA	NA	PF00874	PRD	PRD domain	NA	NA	NA	NA	NA	PS51372	PRD_2	PRD domain profile.	NA	NA	SSF63520	PTS-regulatory domain, PRD	NA	NA	NA	NA	NA	NA	NA	NA	NA	NA	NA	2	GO:0006355	regulation of transcription, DNA-templated	NA	NA	NA	NA	ATGCCGATTGATATTGAGCCCGAGGATATTGCCCAAAAAATTCGCAGTTATGTCAAAATTCATCAGGTTAAAAATGGCTTGATATTAATGGTTGATATGGCGGTATTAAAGAAAAATATTTTGATTATTTGTTGTAATACCGGTGTGGGTACGGCCAGCAAAATTAAGCAGCTGCTCCTTGCCAGTTTGCCTAAAAGGATAAACTTATTGATCAAAACCTATGATTATGACTTTTTAAATTTAACCGGTCAAGAAAAATTGCTAAAGGAAAAGTACCATATCTTAGCGATTGTCGGCACGGTTAATCCTAAATACCAGGATATTGCTTATATCTCTCTTGATCAATTAGTCAACGGGGAAAAGATTGAAGACTTGCAAAATGCGCTGGCCGGTTTCTTA…
118	AFLO3B81533	NA	NA	NA	IPR011608	PRD	PRD domain	NA	NA	NA	NA	NA	NA	NA	PF00874	PRD	PRD domain	NA	NA	NA	NA	NA	PS51372	PRD_2	PRD domain profile.	NA	NA	SSF63520	PTS-regulatory domain, PRD	NA	NA	NA	NA	NA	NA	NA	NA	NA	NA	NA	1	GO:0006355	regulation of transcription, DNA-templated	NA	NA	NA	NA	CCTAGTGATTTAGAAATAAAAATTCTTGGTAATCATTTAATGGAAATGGTAAATCGTGCTGAAAAGAACGAACAACTTGAACCAATTGATCAAGAAATTTTTTCTAATATAACGCAACAATCACTAAAAATATCTCAAAAAATAATTGATTATATCAAAGAAAATATAGGCCCGCTTTCAGCCTCTGAAAAGTACGTTTTATCAATTCATTTTGAAAATATGCAGTCAAAATAA
119	AFLO3B83452	NA	NA	NA	IPR011608	PRD	PRD domain	PTHR30185;PTHR30185:SF6	CRYPTIC BETA-GLUCOSIDE BGL OPERON ANTITERMINATOR;CRYPTIC BETA-GLUCOSIDE BGL OPERON ANTITERMINATOR	NA	NA	NA	NA	NA	PF00874	PRD	PRD domain	NA	NA	NA	NA	NA	PS51372	PRD_2	PRD domain profile.	NA	NA	SSF63520	PTS-regulatory domain, PRD	NA	NA	NA	NA	NA	NA	NA	NA	NA	NA	NA	1	GO:0006355	regulation of transcription, DNA-templated	NA	NA	NA	NA	CCAATTAAAAATCTAAACCCAATTGAATACGATATTGGTCGATATGCAGTGGCTTTAATAAATTCAACTTTAGATAAAGATTTAAATAATGATGAAGCACTGGCTATTGCAGTCCATATCTTAAATGCAGAAGAAGGTCAAAATCTTCAAATAGCTCCTATTAAGGATCAAGAAAAGGCTATTGATCATATATTTGAGATTATTGAGAATTACTTTCATGTTCACCTCAAGCGCGAAGGATTTAACTATTCTCGTTTTGTTACACACCTTGAATATTTGCTTCAAAAAAAACAAATTACAAAATGA
120	AFLO3B81136	NA	NA	NA	IPR011611;IPR029056	PfkB_dom;Ribokinase-like	Carbohydrate kinase PfkB;Ribokinase-like	PTHR43085;PTHR43085:SF8	FAMILY NOT NAMED;FRUCTOSELYSINE KINASE	NA	NA	NA	NA	NA	PF00294	PfkB	pfkB family carbohydrate kinase	NA	NA	NA	NA	NA	NA	NA	NA	NA	NA	SSF53613;SSF53697	Ribokinase-like;SIS domain	NA	NA	NA	NA	NA	NA	NA	NA	NA	NA	NA	2	NA	NA	NA	NA	NA	NA	ATGTGCGTATTAGAGGAATCGCAGTGGCTGAGGACTAAATCAGTCAGTTCACCTGAATTCTTTCATGGTACCTTTGAATTAGTGGAGAAAAATGTCCCAGTGATTTTACTCGAATCTGAAGGTAATACCCGTCCTTTAGACGAACGAGTTGCTGCCTTTGCTAAGAAATATACTAACGAATTTACTGTATTTGATATGAAAAGTTTTCCATTAACCCATATTTCAAAACAATTCAGGGCACTAGTTGAACCAGCAGTGATGTGGGCGGCTTTGCGCCGAGTTAAACTTATGCAAAAAGAATATGTTGTAGGCCTAGGAGACAATGTGGTCGATTACTATCAAAATCAAAATGTTAAATATCCTGGAGGAAATGCAGTAAATTTTGCAGTATTTGCTCCT…
121	AFLO3B81830	NA	NA	NA	IPR011701;IPR020846	MFS;MFS_dom	Major facilitator superfamily;Major facilitator superfamily domain	PTHR23500;PTHR23500:SF239	FAMILY NOT NAMED;SUBFAMILY NOT NAMED	NA	NA	NA	NA	NA	PF07690	MFS_1	Major Facilitator Superfamily	NA	NA	NA	NA	NA	NA	NA	NA	NA	NA	SSF103473	MFS general substrate transporter	NA	NA	NA	NA	NA	NA	NA	NA	NA	NA	NA	2	GO:0055085	transmembrane transport	GO:0022891	substrate-specific transmembrane transporter activity	GO:0016021	integral component of membrane	GAAGTATTGTTGCCGGAGCTAGCGGGCTAACACTTTGGACAAAATATTTGAAATTGAACAGTCTACAAGTAGGCTGGCTTGGAGCACTTAGCGCCAATGCCTTTGGTGCAGCAATTGGTGCATTAATTGGCGGGCACCTATCAGATAAATATGCTGTAGGTGCTGGTGTTCCAGCATCCTGGACGTATATCTCAGAAACTTCTGCTGATAACAATCGAGCAAAAAATATTGGTATCTCCCAATTTGTCTGGTCGCTGGGACCAGTAGTTATTTTTGTTTGTGGTACATTACTCTCACCATTAGGTGTTAATGGTAACCGCATTTTGTTCTTGCTTTTAACAGTCATTGCTTTTATTGCCTGGCTTCTTCAAAAAAGACTGGACGAATCAGAACAATGGC…
122	AFLO3B82252	NA	NA	NA	IPR011701;IPR020846;IPR021530	MFS;MFS_dom;DUF2877	Major facilitator superfamily;Major facilitator superfamily domain;Protein of unknown function DUF2877	PTHR42718	FAMILY NOT NAMED	NA	NA	NA	NA	NA	PF07690;PF11392	MFS_1;DUF2877	Major Facilitator Superfamily;Protein of unknown function (DUF2877)	NA	NA	NA	NA	NA	PS50850	MFS	Major facilitator superfamily (MFS) profile.	NA	NA	SSF103473	MFS general substrate transporter	NA	NA	NA	NA	NA	NA	NA	NA	NA	NA	NA	3	GO:0006909 GO:0055085	phagocytosis;transmembrane transport	GO:0022857	transmembrane transporter activity	GO:0016021	integral component of membrane	ATGACTACATTTAAGAATCTTAATATTGAGCAAGTTGTTACTTGGTTACTTGGCAGAGGAAAGGGATTAACGCCAAGCGGTGATGATATCCTTTGTGGTTACATTTTCATACTATTATTAGTTGGCAAAGCAACTAATTATTTATCAAACTTTATTGAACAAATAATTAGTAATCTGAGTCTTACTACTGATGTGAGTAAAGCTTATCTAATTTGTGCAACACAAGGATACGTTAATTCCAAAGTTTATCAATTATATGAATCCTTGAAAAATCATGATTTAAAAAATATAGACCGTGAGCTAAATTCCATTCTTAATATTGGCCATACTTCGGGTAATGATTTGAGTTATGGGATTGAACTGGGTATTTTAGCTAGTTTAAATACTCCTGAGTCTATG…
123	AFLO3B81261	NA	NA	NA	IPR011763;IPR029045	COA_CT_C;ClpP/crotonase-like_dom	Acetyl-coenzyme A carboxyltransferase, C-terminal;ClpP/crotonase-like domain	NA	NA	NA	NA	NA	NA	NA	PF06833	MdcE	Malonate decarboxylase gamma subunit (MdcE)	NA	NA	NA	NA	NA	NA	NA	NA	NA	NA	SSF52096	ClpP/crotonase	NA	NA	NA	00061+6.4.1.2;00253+6.4.1.2;00254+6.4.1.2;00620+6.4.1.2;00640+6.4.1.2;00720+6.4.1.2	Fatty acid biosynthesis;Tetracycline biosynthesis;Aflatoxin biosynthesis;Pyruvate metabolism;Propanoate metabolism;Carbon fixation pathways in prokaryotes	PWY-4381;PWY-5743;PWY-5744;PWY-5789;PWY-6679;PWY-6722;PWY-7388	Fatty acid biosynthesis initiation I;3-hydroxypropanoate cycle;Glyoxylate assimilation;3-hydroxypropanoate/4-hydroxybutanate cycle;Jadomycin biosynthesis;Candicidin biosynthesis;Octanoyl-[acyl-carrier protein] biosynthesis (mitochondria, yeast)	R-HSA-196780;R-HSA-3371599	Biotin transport and metabolism;Defective HLCS causes multiple carboxylase deficiency	NA	NA	1	NA	NA	GO:0016874	ligase activity	NA	NA	GAGGAATTGATAGGTATTCACATTAGTTTAGCTTCTGCGGCAGCCGCCTATGCAAAGGCTCGGCAGGCCGGCCATCCAGTTATTGCCTTTATTCCAGGGGATGCAGTTTCAGGCGGCTTTTTAGCCCACGGTTTGCAATCCAACAGAATGATTGCCTTAGCTGATGATTCAATTACCATTCAGGCAATGTCAAAGGCTTCAGCTGCTCGAATTACCCAAAGATCAATTCTAGAATTAGAAGAAGCTACGAAGCACGTTCCGGCAATGGCTTATGACATTAAAAATTATGCCAAATTGGGTGCTTTGTATAAATTAGTTCCTGATGTTTCTTCTTGGGACGCAAATGATGCGGCCGTTTCAGAAATTGAGCAAATTATTAATGAGGCCATTACAAGTACC…
124	AFLO3B81763	NA	NA	NA	IPR012914	PucR_dom	Purine catabolism PurC-like domain	NA	NA	NA	NA	NA	NA	NA	PF07905	PucR	Purine catabolism regulatory protein-like family	NA	NA	NA	NA	NA	NA	NA	NA	NA	NA	NA	NA	NA	NA	NA	NA	NA	NA	NA	NA	NA	NA	NA	1	NA	NA	NA	NA	NA	NA	ATGAAACTATACGATCTGCTAGAATTACCAATTTTTCAAAGAAAGCAAAATTTTAACACCAAAATTGGAAGAAATACTGAAATTAAGTCTGTAATGGTTTTAGAGGCTTTAGATATTGAAAAATGGTCACGCAAAAATCAAATCATTTTGACCTCTTTTTATGCATTAAAGCAATTATCGCCCGATGAGATGAATACTTTTTTTGAAAAGATGGTACGGATCGGGATTAGTGGAATTATCGTGAAAGTTGATCGACTGATTAAACAAGTACCAAATTGGTTTATAGACCTTTGCTATCAAAATAAAATTCCGTTAATCAAAGTGGGTACGGAGTTAAATTATGAACAATAA
125	AFLO3B81380	NA	NA	NA	IPR013013	PTS_EIIC_1	Phosphotransferase system, EIIC component, type 1	PTHR30175;PTHR30175:SF11	INVERTASE-RELATED;PTS SYSTEM BETA-GLUCOSIDE-SPECIFIC EIIBCA COMPONENT	NA	NA	NA	NA	NA	NA	NA	NA	NA	NA	NA	NA	NA	PS51103	PTS_EIIC_TYPE_1	PTS_EIIC type-1 domain profile.	NA	NA	NA	NA	NA	NA	NA	NA	NA	NA	NA	NA	NA	NA	NA	1	NA	NA	NA	NA	NA	NA	ATGGTTCCAGTAACTGCTGGCTTATTTGGTCCTTTTGGAGTCTATGTCGGAGAAGGGATTTCGGGAATAATTAATTGGTTAATGAATCTCAATGGCTGGGTAGCAGGTGCTCTCATTGGTGGCGTATGGAATATCTTCGTTATCTTTGGCCTGCAATGGGCGGTCAATCCA
126	AFLO3B80816	NA	NA	NA	IPR013094;IPR029058	AB_hydrolase_3;AB_hydrolase	Alpha/beta hydrolase fold-3;Alpha/Beta hydrolase fold	NA	NA	NA	NA	NA	NA	NA	PF07859	Abhydrolase_3	alpha/beta hydrolase fold	NA	NA	NA	NA	NA	NA	NA	NA	NA	NA	SSF53474	alpha/beta-Hydrolases	NA	NA	NA	NA	NA	NA	NA	NA	NA	NA	NA	1	GO:0008152	metabolic process	GO:0016787	hydrolase activity	NA	NA	ATAGAAGTTATTGCACTAGATTATCCACTAGCTCCAAACTCTTCTTTAAGTAAAATTTTAGAAACAACTGTCCAGTCATTTAAAGAGCTATATAAAAAAGTAATCGAACCACATAATTTTAATTACATATTATGTGGCCGCTCTGCTGGAGGTTTTATTATGTTTTGGTTGGCCAATCAGATTCTCAAATTAAGCCAAATAAAAAAGCCTACCAAAATTATCAATTTCTATGGTTACTATGACTTGAAAGACGCTAGTCGAGCAAAAAAATTATCGACTACGACTATTTCAAAAGAGCTTATACAATCAATAGATACAAAAAATTTTATTCATGATGATTCTGCTTTATCTCGCTATCTTTTATATTTATATCTTGCTGAACAAGGTGATTTGTTAAAA…
127	AFLO3B81285	NA	NA	NA	IPR013131;IPR016040	Mannitol_DH_N;NAD(P)-bd_dom	Mannitol dehydrogenase, N-terminal;NAD(P)-binding domain	PTHR43362;PTHR43362:SF1	FAMILY NOT NAMED;SUBFAMILY NOT NAMED	NA	NA	NA	NA	NA	PF01232	Mannitol_dh	Mannitol dehydrogenase Rossmann domain	NA	NA	NA	NA	NA	NA	NA	NA	NA	NA	SSF51735	NAD(P)-binding Rossmann-fold domains	NA	NA	NA	NA	NA	NA	NA	NA	NA	NA	NA	2	GO:0055114	oxidation-reduction process	GO:0016491	oxidoreductase activity	NA	NA	ATGTTCAAATTATCTGATAATTATCTGGCAAAAGATAATTTATTTGCAAGCACCCAATTTGGGTTCATTTCGGTGGTGGCAACTTATTTAGAGCTTTTTCATGCTGTGATTGCCCAAGAATTACTTAATGAAAATGAATTGAAAAGCGGCATTATCGTCGCTGAAACTTATGATCCTGAAGTCATTTCAAAGATTTATCAAAAATGTGGCGGTCGCCATTTGAGCGTTGTGATGAAATCTGATAACACGCTTGAAAAGGAGCTGATTGCCAGTATTGCACAGGCGATTTACTGCAACAAGACTAGCCAAGAAGGCTGGCAGCAAATGGCGCAGATTTTTGAAAATCCTTCACTGCAGCTAGTCACTTTTTCTTTTACGGAGAAGGGCTACAAGTTAGAT…
128	AFLO3B81360	NA	NA	NA	IPR013148;IPR023296	Glyco_hydro_32_N;Glyco_hydro_beta-prop	Glycosyl hydrolase family 32, N-terminal;Glycosyl hydrolase, five-bladed beta-propellor domain	PTHR43101	FAMILY NOT NAMED	NA	NA	NA	NA	NA	PF00251	Glyco_hydro_32N	Glycosyl hydrolases family 32 N-terminal domain	NA	NA	NA	NA	NA	NA	NA	NA	NA	NA	SSF75005	Arabinanase/levansucrase/invertase	NA	NA	NA	NA	NA	NA	NA	NA	NA	NA	NA	1	NA	NA	NA	NA	NA	NA	ATGTCAGCAACTAGTCAAGATTTACTTCATTGGCAAAAAGAAGGCAAGGAAACCAGCTTGGCTCCGCAAAAAGGCTATGATCATAATGATTGGCGCGATCCAGTTATTGTTTATTCAAAGAAGCGCCAGTGTTATGTTCTTGTGTTAGGTGCACGACTGCCGGGAGATAAAAAGAAGCCAACAGGGCGCCTGGTTTATTTTGAATCAGAAGATTTACATCATTGGCATTTTAAGGGTGACTTTTGGGTACCGAATGAGTTTAACATGATTGAAATGCCAGACTTATTTGAACTTGATCATACCTGGTACCTAATTTTTTCTGAATATTCTGAAGATAAACGGACCAAATATCGCGTTAGTGATGGGTTATTCAATCAATGGCATTCCCTTAGTGATGAA…
129	AFLO3B80990	NA	NA	NA	IPR013497;IPR023405	Topo_IA_cen;Topo_IA_core_domain	DNA topoisomerase, type IA, central;DNA topoisomerase, type IA, core domain	NA	NA	NA	NA	NA	NA	NA	PF01131	Topoisom_bac	DNA topoisomerase	NA	NA	NA	NA	NA	NA	NA	NA	NA	NA	SSF56712	Prokaryotic type I DNA topoisomerase	NA	NA	NA	NA	NA	NA	NA	NA	NA	NA	NA	1	GO:0006265	DNA topological change	GO:0003677 GO:0003916	DNA binding;DNA topoisomerase activity	NA	NA	CTTGAAGTCCGACAAAATTATGTCAAGAAGCCGTTCTACGAAGTGCGTTTTAAAGATGCAGCTAATCATGTTTTCAAAAATCCAGATGGCCAACACTATGAACAACAAGTCCTTGCTAATCAAGCAGCAGCTACCTTAACCTCCTCTACTATTCAGATTACCAGTGAAACTTTAAAGCACCAGGCGCCACCACAAATGCTTAATCTTAGTCATTTATCAGTTATCGTTGGGAAGCATGGGTTCCAATCGCACCAAGTTTTAACTACTTACCAAAAGATGTATCTAAATGACGTAGTTTCTTATCCAAGAACAGCTGACAGGAAGATTACGCAAGGAGACTTTGATCAGTTACTACCTCTAGCGCCCAAAATTGCTCGGTGGTTAACATTGATCCGCAAC…
130	AFLO3B82093	NA	NA	NA	IPR015115	Centromere_CenpB_dimerisation	Centromere protein CENP-B, dimerisation domain	NA	NA	NA	NA	NA	NA	NA	PF09026	CENP-B_dimeris	Centromere protein B dimerisation domain	NA	NA	NA	NA	NA	NA	NA	NA	NA	NA	NA	NA	NA	NA	NA	NA	NA	NA	NA	NA	NA	NA	NA	3	NA	NA	GO:0003677 GO:0003682	DNA binding;chromatin binding	GO:0000775 GO:0005634	chromosome, centromeric region;nucleus	ATGAAAAATACAATCGGAGAAAAGGAAAGTAGGAAAATTCCAGAAAAAGAAAACGAAGAAGAAGAAGAAGAAGAAGAATTCAAACGCCAGTCGCTCGCCGTTCGTTCAACAACGTGGCTCGAAAGTGCGATTCAGAGAAGCGAGGAAGGGGTGGACGACGACGACGACGACGAGGACGACGAAGACGACGAAGACGACGAAAACGACGAAAACGACGAAGACGACGATGCCGCCCCTCGTCCTTCTTCTTCTTCTTCCTCTCCGATCTTGGCCAACGTGGTCCAACTGTACGGTGTTGTTGTACGGATAAGATGTAACTGTAACAACAACAGTTGTGTTAGAAGGTGA
131	AFLO3B81734	NA	NA	NA	IPR015330	DNA_primase/pol_bifunc_N	DNA primase/polymerase, bifunctional, N-terminal	NA	NA	NA	NA	NA	NA	NA	PF09250	Prim-Pol	Bifunctional DNA primase/polymerase, N-terminal	NA	NA	NA	NA	NA	NA	NA	NA	SM00943	Prim_Pol_2_a	SSF56747	Prim-pol domain	NA	NA	NA	NA	NA	NA	NA	NA	NA	NA	NA	2	NA	NA	NA	NA	NA	NA	ATGGTTTTAGAAAATCTAGTCAATTACGCAATTAGTTATGCTTCACACGGATTTTCTGTAATACCTATTGGTGCGACCAAACGACCATTGATTAAGTTTGCTAATCAACCACCACTTACTAAAGATGAATTAAACAGACATGGTGAAGTTGACGGCATGGATGCCATCAAGCAATTAAATCATAACGAGTGGTTCAAAGGTACATTAACTGAAAAAACTGCACATGATGGCTTTCATTTCTTCTTTCAAAAACCGAAAAATGAAACCATTGCGCAAAATATCGGTTTCTTGCCTGGAGTTGATTTGAAGGCACACGAAAACAATTACGTGGTGGTAGCGCCGAGCCAGATTAATGGCAAACACTACAAATGGCTTAATCACGATATTATTCGTCCAGCC…
132	AFLO3B81860	NA	NA	NA	IPR015927	Peptidase_S24_S26A/B/C	Peptidase S24/S26A/S26B/S26C	NA	NA	NA	NA	NA	NA	NA	NA	NA	NA	NA	NA	NA	NA	NA	NA	NA	NA	NA	NA	SSF51306	LexA/Signal peptidase	NA	NA	NA	NA	NA	NA	NA	NA	NA	NA	NA	1	NA	NA	NA	NA	NA	NA	ACAACAGTTTTATGTAATAGTGGAGAAGTGGCGGTAGCCATTATCCACAATCATTTGATTATTAGAAGAGCTAAAGTTATTGATAATAAAATAGTTTTAACCTGTGATAATAATAAATTTGATCCAATCATCATTGATCCTAATGATTTTGCTATTATAGGAAAAGTGTTGCATTTTGATTCTGATATTGAATAA
133	AFLO3B81025	NA	NA	NA	IPR016040	NAD(P)-bd_dom	NAD(P)-binding domain	PTHR14194;PTHR14194:SF93	NITROGEN METABOLIC REGULATION PROTEIN NMR-RELATED;DIVINYL CHLOROPHYLLIDE A 8-VINYL-REDUCTASE, CHLOROPLASTIC	NA	NA	NA	NA	NA	NA	NA	NA	NA	NA	NA	NA	NA	NA	NA	NA	NA	NA	SSF51735	NAD(P)-binding Rossmann-fold domains	NA	NA	NA	NA	NA	NA	NA	NA	NA	NA	NA	3	NA	NA	NA	NA	NA	NA	ATGAAATACGCTGTTACAGCTGCAACCGGAAATTTTGGCCAACTGGCTGTGAAATATTTAAGTCAATTAACTAGTTCAAAAGATATTGTCGCAAATCATGTTAGCTTTGTGGCCTATACTAGTTTTGCTCATGCTCAAAGTTCACCTACACCGCTAGCTCAAGATCACAAGCTAACTGAAGACATGATTATTAAAACCAATATTGCGCACTCGTTTTTGCGTAACAACTGGTATTTAGAAAATGAAGCAGGATTTTTTGCAAGTGCTAAAGAAGCACAAAAAGCTGTTACTGGCAGACAATTGTGCCGGCTGGGCTTTAGAAACCACGTGAAGTTTTACGAATTTACGGGCAAGCCAATTACTTACCAAGAGCTAGGACAAGCTACAAGCGAAGCATTG…
134	AFLO3B81595	NA	NA	NA	IPR016102	Succinyl-CoA_synth-like	Succinyl-CoA synthetase-like	NA	NA	NA	NA	NA	NA	NA	NA	NA	NA	NA	NA	NA	NA	NA	NA	NA	NA	NA	NA	SSF52210	Succinyl-CoA synthetase domains	NA	NA	NA	00020+6.2.1.5;00640+6.2.1.5;00660+6.2.1.5;00720+6.2.1.5	Citrate cycle (TCA cycle);Propanoate metabolism;C5-Branched dibasic acid metabolism;Carbon fixation pathways in prokaryotes	PWY-5392;PWY-5537;PWY-5538;PWY-5690;PWY-5913;PWY-6728;PWY-6969;PWY-7384	Reductive TCA cycle II;Pyruvate fermentation to acetate V;Pyruvate fermentation to acetate VI;TCA cycle II (plants and fungi);Partial TCA cycle (obligate autotrophs);Methylaspartate cycle;TCA cycle V (2-oxoglutarate:ferredoxin oxidoreductase);Anaerobic energy metabolism (invertebrates, mitochondrial)	NA	NA	NA	NA	3	NA	NA	NA	NA	NA	NA	ATGGTTAATGAGGTAGATGCAATTACAGTTAAAGATGCAATTGCGGCTTTAGAAGATCATGAGCCAACGGATGTGATTTGTGTCATTTCTAAACCACCTGCAAAAAAGGTTAGAGATGAAGTTATGCAGATTCTTGAAAGCTGTGATAAGCCCGTTGTTGCTGACTTTTTAGGTGAGAGACCTACTCATTATGAAGGTAATGTTTATTTAGCTCATACATTAGAAGAAACGGCTAAGATTGCTGTTGATTTGGCAGCTGTTGAACTACCAGCTAATGTTAAAACACTAGCAGAAGATAAAACTATTAAGGGACTCTATTCAGGTGGAACTTTGGCTAATGAAGCCGGCATGCTGATTCTGAAGCACTTGACTTAG
135	AFLO3B80430	NA	NA	NA	IPR016913	UCP029215	Uncharacterised conserved protein UCP029215	NA	NA	NA	NA	NA	NA	NA	PF09979	DUF2213	Uncharacterized protein conserved in bacteria (DUF2213)	NA	NA	NA	NA	NA	NA	NA	NA	NA	NA	NA	NA	NA	NA	NA	NA	NA	NA	NA	NA	NA	NA	NA	1	NA	NA	NA	NA	NA	NA	ATGCTGACGCGGTATGACACTGCACCAATCAACAAAATTGAGCAAGACGCTACCACGGGCTTCATTCACATAAACAACGTGCCGATTGCTCGTGTAGGCGTCTTTCCATACTTAAAAGCTGATGGTTCGATTGAAATGGAAGCTAAGCTTCCGACAGAATTGTTGGCTGACACTACGGTTGATAGTGCTAATAACAAGCCGGTAACTGATGACCATCCAGAAGAGTTTGTAAATCAAAGCAATGCAAATAAGTACATGAAGGGCTTCACGGCTTCGAATGCACATGTTGATAACGACACATTGCGTGTTGACATGACAATAACTGATGCTGAACTGATTAACGAAATTAACCAGGGCAAGCAAGAATTGTCAATTGGCTTTGAAACGGAATCGTGCCAC…
136	AFLO3B81108	NA	NA	NA	IPR016913;IPR018392	UCP029215;LysM_dom	Uncharacterised conserved protein UCP029215;LysM domain	NA	NA	NA	NA	NA	NA	NA	PF01476;PF09979	LysM;DUF2213	LysM domain;Uncharacterized protein conserved in bacteria (DUF2213)	NA	NA	NA	NA	NA	NA	NA	NA	SM00257	LysM_2	SSF54106	LysM domain	NA	NA	NA	NA	NA	NA	NA	NA	NA	NA	NA	2	NA	NA	NA	NA	NA	NA	ATGGCAAAAGATCCAGAAGGAGTATTTGATTATTCAGCATGTCAAACCTATGTTGTACAAAAAAATGAGACTCTATTCGACGTTGCGCAAAAATGTGGTCTTGCTCTTCAGCAATTACGCTATTTTAACCACTTAAACAAAGCGACTTGGAAAATTCGCGAAGGCCAAACACTATATTTGCCCGTTGCGCCGGTCTATGTTCCTGCGGTAACTGATAATTCGGTTGAGATGGAAGCTAAATTACCAACGGAATTATTGACGCAAAGTACGGTGAAAAGCGCGGAAAATAAGCCAGTAACTGATGATCACCCAGCTGAGTTAGTGACACAGCAAAATGCTGCTAAATATATGAAGGGATTTACGGCATCTAATGCACAT
137	AFLO3B81148	NA	NA	NA	IPR017853;IPR032311	Glycoside_hydrolase_SF;DUF4982	Glycoside hydrolase superfamily;Domain of unknown function DUF4982	PTHR42732	FAMILY NOT NAMED	NA	NA	NA	NA	NA	PF16355	DUF4982	Domain of unknown function (DUF4982)	NA	NA	NA	NA	NA	NA	NA	NA	NA	NA	SSF51445	(Trans)glycosidases	NA	NA	NA	00052+3.2.1.23;00511+3.2.1.23;00531+3.2.1.23;00600+3.2.1.23;00604+3.2.1.23	Galactose metabolism;Other glycan degradation;Glycosaminoglycan degradation;Sphingolipid metabolism;Glycosphingolipid biosynthesis - ganglio series	PWY-6807	Xyloglucan degradation II (exoglucanase)	NA	NA	NA	NA	1	NA	NA	NA	NA	NA	NA	ATGAATATATGGGTGGGGTATTTTTTATGGACTGCTTTTGATTATTATGGCGAACCATCACCTTTTGGCTGGCCGGGGATTAGTTCTCAGTTTGGAATTATGGATTTAGGTGGCTTGCCTAAAGATTATTTTTACTATTATCAGGCTCAGTGGCAGGATCAGCCGGTACTTCATTTGATGCCTTCATGGAATAAGACTGATTTAACAATTGAAAATGGTCAAACTAGGGTTAGAGTTTTTTCAAACCTTGATGAAGTCGAACTATTTATCAACCATAAAAGTTTAGGTAAAAAAGTCGTTAAAAACTATGAATGTGATTGGCTAGTTGAATATGAACCGGGAGAGCTTTTAGCCAGGGGATACGTGAAAGATAACGTTTTGCTAGATGATAAAAAAGAA…
138	AFLO3B80374	NA	NA	NA	IPR017987	Wilms_tumour	Wilm's tumour protein	NA	NA	NA	NA	PR00049	WILMSTUMOUR	Wilm's tumour protein signature	NA	NA	NA	NA	NA	NA	NA	NA	NA	NA	NA	NA	NA	NA	NA	NA	NA	NA	NA	NA	NA	NA	NA	NA	NA	NA	1	NA	NA	NA	NA	NA	NA	ATGTTGGCGGTGGTGCCACCGCCGCCGTCACCACCGCCACCGTCGCCGCCGCCGCCACCTCCACCGCCGCCACCACCACCACCACCACCATCGTTGCCAATGTTGAACATACTGTCAATGGTGGTGGTAAAGGTAGATGTAATATCGCCGTGGTAG
139	AFLO3B81331	NA	NA	NA	IPR018060	HTH_AraC	DNA binding HTH domain, AraC-type	NA	NA	NA	NA	NA	NA	NA	NA	NA	NA	NA	NA	NA	NA	NA	PS01124	HTH_ARAC_FAMILY_2	Bacterial regulatory proteins, araC family DNA-binding domain profile.	NA	NA	NA	NA	NA	NA	NA	NA	NA	NA	NA	NA	NA	NA	NA	1	GO:0006355	regulation of transcription, DNA-templated	GO:0003700 GO:0043565	transcription factor activity, sequence-specific DNA binding;sequence-specific DNA binding	NA	NA	ATGGTTAAGCTGCTTGCTAATAGCACGAAACACAACTTCAATCACAACAATTATTTAGTCTTTAATTTGAATAATAATCTTGTTGCAAAACAACTAATCGAAAATATTATTACCCTGGGCCTTAACCAACAAGGTAAAAATATTCAGCCAATTCAGGCGATGATGCGCGCGCTAATTCTTTGCGTTGAAGATAGTGACATAGTTAAGGAGGTAATTAATTTTATTGAAGTCAAACAGGATAAAAACTTGCAAATTATTGAATACCTAAATAACCATTATCAGACCGTCACGTTGAACAGTTTAGCAGATCATTTCGGCTATAATTCCAACTACCTCGGCAACAAAATTAAAGAATCGTCCGGTCATACCTTTAAAGAATTATTGCAAATGCGCCGCTTA…
140	AFLO3B80431	NA	NA	NA	IPR018392	LysM_dom	LysM domain	NA	NA	NA	NA	NA	NA	NA	NA	NA	NA	NA	NA	NA	NA	NA	NA	NA	NA	NA	NA	SSF54106	LysM domain	NA	NA	NA	NA	NA	NA	NA	NA	NA	NA	NA	1	NA	NA	NA	NA	NA	NA	CATGTCAAACCTATGTTGTACAAAAAGGGAACATTGTTAGAAGTTGCCCAGAAAAAGGATGTGGCATTACAGCAATTACGCTATTTTAACCACCTGGATAAGGCAACCTGGAGAATTCGCGAAGGGCAAACGCTGTACATCCCTAAGCAACCAATTCATGTGCCAGCCGGGGAGTAA
141	AFLO3B81802	NA	NA	NA	IPR018485	Carb_kinase_FGGY_C	Carbohydrate kinase, FGGY, C-terminal	NA	NA	NA	NA	NA	NA	NA	PF02782	FGGY_C	FGGY family of carbohydrate kinases, C-terminal domain	NA	NA	NA	NA	NA	NA	NA	NA	NA	NA	SSF53067	Actin-like ATPase domain	NA	NA	NA	NA	NA	NA	NA	NA	NA	NA	NA	1	GO:0005975	carbohydrate metabolic process	GO:0016773	phosphotransferase activity, alcohol group as acceptor	NA	NA	ATGTGTGGTGCAGCTGGAGTTGGCCTAGGTGAAGCAGAACTTCTTGATTCAACTGGGACGACTGAGGCAATGATGACAATTGTAAAGCATTTTGATATTTCGTCTAGAGCACAAAAAAATGCACTGGCCAACGGTATTTATGTAGACGGTCGACATTATACTAGATTTACTGCGATGCCGGCTGCGGGTTCAACAATTGCTTGGCTGATGAACCTTTGTCGAATAAATGAAAACAAATTAGTAGAGTTAATGAATGAAGCTCAGAAAGGTTATGATGATTATTCATTATTTAAATCTAGAGTTCTAGTAATGCCACATTTTAATGGCAGCGGCTCACCAAATAAAATGTCTAGTAGCAAAGGAATCATATATGGCTTAACAAGCCAAACTACATTGGTC…
142	AFLO3B81159	NA	NA	NA	IPR020049	DUF2184	Protein of unknown function DUF2184	NA	NA	NA	NA	NA	NA	NA	PF09950	DUF2184	Uncharacterized protein conserved in bacteria (DUF2184)	NA	NA	NA	NA	NA	NA	NA	NA	NA	NA	NA	NA	NA	NA	NA	NA	NA	NA	NA	NA	NA	NA	NA	4	NA	NA	NA	NA	NA	NA	CTAACAAAAAGTTATCAATATGAAAATGATCATTTGGATGAAGCGGTTGAGTCACGTTTAAGTTTAATTAACCAAATTAAACCATATCTTGGGGATGATTATTCTTTTAAGGGCAAATCGAGTAAAGAACTAAAACTAGCCGCTATCAGGCAGGTAGACGATACGGCTGAATTGGGCAATAAATCAGATGAATATATTGATGCTTACTTTACTGCAATGGATCATAATCATCAGCAAGCCAAAGTAGTTGATGGTAAATTGTATGACGATGGTCAACTATCGCCTGGCAGCATTGCTACTACAGAACCAGTGACGATTAATACGGAAAATGCTGGGGCTTTAATCAATTATGGGGTAGCAGTAGTTTTACAGGATGGTAAAGTAGTGCCAGCAACTGGT…
143	AFLO3B80069	NA	NA	NA	IPR020846	MFS_dom	Major facilitator superfamily domain	PTHR11328;PTHR11328:SF46	MAJOR FACILITATOR SUPERFAMILY DOMAIN-CONTAINING PROTEIN;INNER MEMBRANE SYMPORTER YICJ	NA	NA	NA	NA	NA	PF13347	MFS_2	MFS/sugar transport protein	NA	NA	NA	NA	NA	NA	NA	NA	NA	NA	SSF103473	MFS general substrate transporter	NA	NA	NA	NA	NA	NA	NA	NA	NA	NA	NA	2	NA	NA	NA	NA	NA	NA	ATGAGTGAGAATAATAATTCACAAAAACCAGCTGAAAAAGCGGCTGGTTTGAAGAGTGTTCAGGTTAAAGCCAGACCTTTTGGCTGGCGCGATAATATTGGTTATATGACTGGAGATTTAGGAAACTGTTTTATTCTTGGTTTGGTAAATAGTTTCTTAATGATTTATTTAACAAATTCGGTCGGATTAGCAGGTGCAATTGTCGGCACAATGTTTTTAGTCGGTAAGTTTATTGACGCATTTTCTGACGTTACTATTGGCCGTTTGACGGATACTTCCAAGTTGACTAAAGACGGAAGATTCATTCCTTGGATAAAGAAATATCGCTGGTTCTTCGGGATTGCTACAGTATTGTTGTTTGTACCCATGGGGAATCTTCTTTCCTGTGTAAACATTCCA…
144	AFLO3B81065	NA	NA	NA	IPR020846	MFS_dom	Major facilitator superfamily domain	PTHR11328;PTHR11328:SF47	MAJOR FACILITATOR SUPERFAMILY DOMAIN-CONTAINING PROTEIN;SULFOQUINOVOSE IMPORTER-RELATED	NA	NA	NA	NA	NA	PF13347	MFS_2	MFS/sugar transport protein	NA	NA	NA	NA	NA	NA	NA	NA	NA	NA	SSF103473	MFS general substrate transporter	NA	NA	NA	NA	NA	NA	NA	NA	NA	NA	NA	2	NA	NA	NA	NA	NA	NA	ATGGAGTCGGAATTGGTGCGGGTGTTGTTGGTGGTATTTTTTGCTTTTACAAAAATTTTTGACGCATTTATGGATCCAATCGCTGGATCAGTTGTTGATAACCGAAAGCATATTGGAAAACGTGGTAAATTTCGACCGTTTATGATGGTTTCTGCCATTATTCTAGGCGTTTTAACGGTTTTAACTTTTACGATGCCAAATAATCTGACGATGACGCAAAAGATTATTTACGCTTATGCGGCTTATATGATTTGGGGCTTAACGTATTCGTTTACTAATGATCCGTATGGTTCATTGGCTTCAGTTATGTCGCGCAATTCACAAGATCGCAGCTTTATGGCGACCACCCGGCAAATTGGTTCTGTCGGAGCCCAGTTTATCGCGGGAGTAGCTTTTATC…
145	AFLO3B81506	NA	NA	NA	IPR020846	MFS_dom	Major facilitator superfamily domain	NA	NA	NA	NA	NA	NA	NA	NA	NA	NA	NA	NA	NA	NA	NA	PS50850	MFS	Major facilitator superfamily (MFS) profile.	NA	NA	SSF103473	MFS general substrate transporter	NA	NA	NA	NA	NA	NA	NA	NA	NA	NA	NA	1	NA	NA	NA	NA	NA	NA	ATGGATAATATTAATAGTGAGAATAATTTAACTAAAAAATACCAACCATTAGCTGTTGCGGCAGGTTTTGGCTCGATTTTAGGATCCGGCATTATTGTCGGCATGTCGTCTACAATTACTGTTTGGCAAAATGGACTTAACCTAACTAATGGTCAAGTGGGTGTTATTTCTGGTGCCTTGACTTTTGCAATAGCAATCGGTGGTTTAATAACCGGATTGGTAACGAAGGCTTTTGGATTAGTACG
146	AFLO3B81857	NA	NA	NA	IPR023616	Cyt_c_oxase-like_su1_dom	Cytochrome c oxidase-like, subunit I domain	NA	NA	NA	NA	NA	NA	NA	NA	NA	NA	NA	NA	NA	NA	NA	NA	NA	NA	NA	NA	SSF81442	Cytochrome c oxidase subunit I-like	NA	NA	NA	00190+1.9.3.1	Oxidative phosphorylation	PWY-3781;PWY-4521;PWY-6692;PWY-7279	Aerobic respiration I (cytochrome c);Arsenite oxidation I (respiratory);Fe(II) oxidation;Aerobic respiration II (cytochrome c) (yeast)	R-HSA-5628897;R-HSA-611105	TP53 Regulates Metabolic Genes;Respiratory electron transport	NA	NA	2	GO:0006123 GO:0006264 GO:0009060 GO:0015990 GO:0030431 GO:0055114 GO:1901214	mitochondrial electron transport, cytochrome c to oxygen;mitochondrial DNA replication;aerobic respiration;electron transport coupled proton transport;sleep;oxidation-reduction process;regulation of neuron death	GO:0004129 GO:0005506 GO:0005515 GO:0020037	cytochrome-c oxidase activity;iron ion binding;protein binding;heme binding	GO:0005743 GO:0005751 GO:0016021 GO:0045277	mitochondrial inner membrane;mitochondrial respiratory chain complex IV;integral component of membrane;respiratory chain complex IV	CGCGTCTCTCTGCGATCCAAATATTTTTCCGAAAGCTTCCGCGGCTCGATATCCGGGGAAATAAGAGAATAATACACTTTCCACCGTATTTCATAATGCTATCCACGTTCGATTCGAACGTGGACATTTTGTTGGAAAAAAAGAAAAGAAGAAACTTCATCTCCGGAAATATCGGATCTTTCGTGCCGCAAGGAATCGAGAATCGAAGAAAAAATCGTTCGGGGGATGAGATTCTCGAGTGGCTTTTCGACCTATTTTACTTATTACCAGTTCTTGCTGGAGCAATTACTACATTATATTTATTTGATCGAAATTTTAATATATCATTTTTTGGTCATCCAGAAGTTTATACTTTAATTTTACCAGGATTTGGTCTAATTTCTCTCTAA
147	AFLO3B81109	NA	NA	NA	IPR024459	DUF1073	Protein of unknown function DUF1073	NA	NA	NA	NA	NA	NA	NA	PF06381	DUF1073	Protein of unknown function (DUF1073)	NA	NA	NA	NA	NA	NA	NA	NA	NA	NA	NA	NA	NA	NA	NA	NA	NA	NA	NA	NA	NA	NA	NA	1	NA	NA	NA	NA	NA	NA	GCTGGGACACTAGCCGGCGCCAGCCAAGATGTAGTTAACTACTATGACACTGTGAAGGCTATTCAGGAATCACTCTTAAAGCCGGAACTCGAATATATTGTTAAATTGCTAATGTATGCAGATGAAGTCGGCAATGGTCAAGAAGATCTGGCTAAATTAACTTGGCATATTGAATTTAATCCTCTTTGGTCACCTGATGATAAGACGCAATCAGAGACTTTGCTCAATCATATGAATGCTGCGGCAACTGCAGTCAGTTCAGGGATTTATTCACCTAAAGAGGCTAAGCGACTTCTTGATGGTCAAGGAATAATGCTATTCAAGGATGCAGCTTGTAGGAAAGTCAAAGCAAACTAA
148	AFLO3B81068	NA	NA	NA	IPR027417	P-loop_NTPase	P-loop containing nucleoside triphosphate hydrolase	NA	NA	NA	NA	NA	NA	NA	NA	NA	NA	NA	NA	NA	NA	NA	NA	NA	NA	NA	NA	SSF52540	P-loop containing nucleoside triphosphate hydrolases	NA	NA	NA	NA	NA	NA	NA	NA	NA	NA	NA	1	NA	NA	NA	NA	NA	NA	ATGACACTAGTCTTGCAAATGCGAATCTTGGTGTGGTTAACGGAGACTAAAACGGGAGATCTAGATGAATTACAGCTGACTAACTATAAGGCACCGTTGTTTGTTCAGATAGCTCATCCGGGGGATGCCCGGGTAGGTAGTAGTTTTGCTAAAGTCGATTTTTGGAATTTAGCGCGGCAAAAGCAAGAAGAAGCCGATATTTTAATTACTAACCACGCCTATTTGGCCAATCATTACAACGACACAATTTGGGGACAAAATCCTTATTTGGTGATTGATGAAGCTCACCGTTTTGTCGATAACGTAATCAATTCGCGGAATGATTCATTTCAGTTTGAATCACTTTGGGGCGTACTCAATCATTTGCGCAATCTTTTGTTTATGCTGAAGATAGCGTAT…
149	AFLO3B81089	NA	NA	NA	IPR027417	P-loop_NTPase	P-loop containing nucleoside triphosphate hydrolase	NA	NA	NA	NA	NA	NA	NA	NA	NA	NA	NA	NA	NA	NA	NA	NA	NA	NA	NA	NA	SSF52540	P-loop containing nucleoside triphosphate hydrolases	NA	NA	NA	NA	NA	NA	NA	NA	NA	NA	NA	1	NA	NA	NA	NA	NA	NA	ATGATGCTTGAACGAAACTATCAATTTACCGGACATCCAACGGAAAATGATTTCAAAAAGTTATATGCAAACAATCCTGAACAGATTTTTCGTGAATTCTTGTATCGTCTAATTGGTAAAATGCAAGAGGCAGGAACTCATTACGCTTCGATTGAAAGTTTGTATCGCTCAGAACTTGGGGCATACCTGAAAAAGGAACTAGGAGCAAAGATGCTTAATATTTATATTGAAGCTCCTCTTGAGGTTAGGGCGAAACGCGAATTTAAGAAACAAACTATCGATAATGGGGAAAACTATACCTTTGATGAAATAGTTGAACGAACCAAGAAAAAAGACCAGTTTAAGATAAAACATGGGGCATTAAGGGTTAAAGAAATTGCAGATATTATCGTTAATAAT…
150	AFLO3B81473	NA	NA	NA	IPR027417	P-loop_NTPase	P-loop containing nucleoside triphosphate hydrolase	PTHR24031;PTHR24031:SF520	RNA HELICASE;DEAD/DEAH BOX RNA HELICASE FAMILY PROTEIN	NA	NA	NA	NA	NA	NA	NA	NA	NA	NA	NA	NA	NA	NA	NA	NA	NA	NA	SSF52540	P-loop containing nucleoside triphosphate hydrolases	NA	NA	NA	NA	NA	NA	NA	NA	NA	Y	NA	1	NA	NA	NA	NA	NA	NA	ATGGTAATCTATAATGCTGATCGCTTTGGTATTAGTCAATTGCACCAACTTCGAGGTCGAATCGGTCGAGGCAGCACACAAAGTTATTGTATTTTTCTGGCTGATCCTAAAACGGAGGCAGGAAAATCACGCATGAAAATCATCGCTTCGACAACGGACGGTTTTAAGCTTGCCGAGGAGGATTTAAAGATGCGTGGTGAAGGAGATTTATTTGGTAAAGCACAGTCTGGTCTGCCGGAATTCCAGGTCGGCAACGTAGTGAATAATTATGAAACTTTGGTGGTTGCGCAAAAAGAAGCACAGGAATTAATCAAAAAAGATCCAAATTTAACAAATTCTACGCATAAAAATTTACAACAAGTGCTAGAATATAAACAATTACAGCAAGAACGTACTTAG
151	AFLO3B81327	NA	NA	NA	IPR029058	AB_hydrolase	Alpha/Beta hydrolase fold	NA	NA	NA	NA	NA	NA	NA	NA	NA	NA	NA	NA	NA	NA	NA	NA	NA	NA	NA	NA	SSF53474	alpha/beta-Hydrolases	NA	NA	NA	NA	NA	NA	NA	NA	NA	NA	NA	1	NA	NA	NA	NA	NA	NA	GGACCACATTACAACATGAACAACCTAGTTTCAATTGACTTCACTGATTTGATGAACTTGTGGTTTGTCCATGAATTACTTGAAATTGACAATCATGCCTACGAGCAATGGCCAACCGTAATGGTTCAGGATAACCTAGAAGCAGATAACTGGCATGAAGAAGCTGATTGGAGTAACGATCTTGGCCAAAAGACG
152	AFLO3B24815	NA	NA	NA	IPR029526	PGBD	PiggyBac transposable element-derived protein	NA	NA	NA	NA	NA	NA	NA	PF13843	DDE_Tnp_1_7	Transposase IS4	NA	NA	NA	NA	NA	NA	NA	NA	NA	NA	NA	NA	NA	NA	NA	NA	NA	NA	NA	NA	NA	NA	NA	6	NA	NA	NA	NA	NA	NA	ATGGTTTTACCATTCGTATTGGTACATATTGACAAACAATTATCAAAAACTCTTTTTAAGCCAAGCCAAGATATTGTAGTCAAGGAGACAATGCTTTTTTGGAGGGGACGACTAGTATTCAGGCAATACATACCAACTAAATCGTTCACTAAAGGATACTATATACATATTATTGGAACTGTATGTTACAACAAAAAATTTATGCCAAATTTTGTTGTTGTGCTAAAATGGAGAGGTGTTCGCAATATTAGAATATTATTAATATCCGCTTTTCTCTTAAGAACAATTATCTTAAATGCACATATCTTGTATCAAAAAGCCATAAACAAGAAAATCATGGAAATTCGTTTTAATAACATTGCAGCAAAGACTGCTACAAATTTGTTACATTGTGTGAAA…
153	AFLO3B82313	NA	NA	NA	IPR029526	PGBD	PiggyBac transposable element-derived protein	NA	NA	NA	NA	NA	NA	NA	PF13843	DDE_Tnp_1_7	Transposase IS4	NA	NA	NA	NA	NA	NA	NA	NA	NA	NA	NA	NA	NA	NA	NA	NA	NA	NA	NA	NA	NA	NA	NA	1	NA	NA	NA	NA	NA	NA	ATGCATACATTTATAAGCATTTCGTTAATGGATATCGTTAAAGTACCCCAAATCCGCTTATATTGGTCGAAGAATAAACGTATAAAAAATTCTATGTCGCGAGAACAATTTTTGGATATCCTTCAATACTGGTATTTTTCTGATGGCGATCAAGTCTGTTCCGATATTCCATTACACAAAATAAATACATTTGTAAAAAAAGATAAACCGAAACTTCCTGAAAGTAATGAAACCTGGGAAAGAATTAATAATAGAGGAATGTATGATATCATCCCATATAGAAATCACTATCAGAGGACACAAATCGAATGTTCTAAGCTATAA
154	AFLO3B82957	NA	NA	NA	IPR032272	DUF4834	Protein of unknown function DUF4834	NA	NA	NA	NA	NA	NA	NA	PF16118	DUF4834	Domain of unknown function (DUF4834)	NA	NA	NA	NA	NA	NA	NA	NA	NA	NA	NA	NA	NA	NA	NA	NA	NA	NA	NA	NA	NA	NA	NA	2	NA	NA	NA	NA	NA	NA	ATGATGATGGTGATGATGATGATGATGATGATGATGATGACGATGATGATGATGATGACGATGACGACGATGATGATGATGACGATTACGATGATGACGATGATGATGATAAATTCTTGTGGTAATAATAATAATAATAATAATAATAAAAATAATAATAATAATAATAATAATAATAATAATAATGATAATAATGATGATAATAATAATAATAATAATAATAATAGTAATAATAATAATAATAATAAAAATAAAAACGACAAAAATATATGGAAGATTTTAAAAAAAGAGAAAAAAGACTCAGTAAATAACACTTAG
155	AFLO3B81542	NA	NA	NA	NA	NA	NA	PTHR43490;PTHR43490:SF24	FAMILY NOT NAMED;SUBFAMILY NOT NAMED	NA	NA	NA	NA	NA	NA	NA	NA	NA	NA	NA	NA	NA	NA	NA	NA	NA	NA	NA	NA	NA	NA	NA	NA	NA	NA	NA	NA	NA	NA	NA	1	NA	NA	NA	NA	NA	NA	ATGACGGTTAACCCGGGACCGGTTTATACTAATTTCTTTAATATTGCTGATAAAAGTGGTAATTACGTTAAAAATGTTGAACGCTATATGCTTGATCCCGATGATGTGGCCTGGCAAGTTGTCCATTTCTTTGGCAGCAATAAGCGCGAATTGAATTTGCCGCTAAGTCTTGCATTTTTAGCTAAACTTTATAATCTGTTTCCAGCAATTGGAGATGAATTATCGCTTAAGTTGCATCAAGAAAGTAGTGCAGAACAATGA
156	AFLO3B80762	NA	NA	NA	NA	NA	NA	PTHR42995;PTHR42995:SF2	FAMILY NOT NAMED;SUBFAMILY NOT NAMED	NA	NA	NA	NA	NA	NA	NA	NA	NA	NA	NA	NA	NA	NA	NA	NA	NA	NA	NA	NA	NA	NA	NA	NA	NA	NA	NA	NA	NA	NA	NA	1	NA	NA	NA	NA	NA	NA	ATGTCAATTACTAGTGCAATTATGTCATACTTAATCACAACTCCAAAAGCTAGAATTGCTTTAAATGGTCCCGAAGTTATCGAACAAGAAGCTGGTGTACGTGAATTTGATTCTAGTGATAAGGACTTAATTTGGAATACGCTTGGAACTCGTCAAAGAGTAGCTACAGGAATTGCAGATGAAGTTGACGAAGATGATATCACGACTATTAAAGAAGCTATTGATAGAGCAATCGAAGAAAAAAGGATGCTCATCGGACTGAGCAATCTGATTTTTATCTATCTTTACTTGATCAAATTGATTTTGCTAAGCCCCTTACTACAAAGCAATATTGTTCTCTTTATGCTAAAAATCAGGCTAATAAGCATGATATAA
157	AFLO3B81415	NA	NA	NA	NA	NA	NA	PTHR37324;PTHR37324:SF3	FAMILY NOT NAMED;SUBFAMILY NOT NAMED	NA	NA	NA	NA	NA	NA	NA	NA	NA	NA	NA	NA	NA	NA	NA	NA	NA	NA	NA	NA	NA	NA	NA	NA	NA	NA	NA	NA	NA	NA	NA	2	NA	NA	NA	NA	NA	NA	ATGCCAATTTCACAAGCAGTTCAAAACTTCTTGACTAAGAGATTCCCTAATCGAAAAGATTTGTTTATTGGATTAGATATTGCAGTAGCAATTGGCAATTCATCAATTATTTCAACGGCATTATTGCTAACTCCGATTGCTATTTTTCTGGCATTTATTTTACCAGGAAATAGAACGCTACCATTAGCTGATTTAGCTAATCTAGCCGTTGCTATGGCTCCCATTATTACTAAAATGGCACGCGCGGTTGCGTACAAGGGAGCTGCGCATGCTACGGTAACTAGTTTCTTGGATGGTGGTAATCCACTTAGATTTTGGTTGGTCAAAATTTTTGAACTTAATCCTATTGCATTGGTTTCAGTCATCGTAGTTGGACTTCTTTTATGGTGGATTTATCGG…
158	AFLO3B23434	NA	NA	NA	NA	NA	NA	PTHR34723	FAMILY NOT NAMED	NA	NA	NA	NA	NA	NA	NA	NA	NA	NA	NA	NA	NA	NA	NA	NA	NA	NA	NA	NA	NA	NA	NA	NA	NA	NA	NA	NA	NA	NA	NA	1	NA	NA	NA	NA	NA	NA	CACCTACCTACCTACCTACCTACCCATCTACCTACCTACCTACCTACCTACCTACATACCTACCTACCTACCTACCTACCTACCTACCTACCTACCTACCTACCTACCTACCTACCTACCTACCTACCTACCTACCTACCTACCTACCTATCTACCTACCTACCTATCTACCTACCTACCTACCTACCTACCTACCTACCTACCTACCTACCTACCTACCTACCTACCTACCTACCTACCTACCTATCTACTTGTTTCACTCTCTCATCCCTTCTTCTTTCTCTTACTCTGTCCAGACCTGCTGACCAATGTAAATAA
159	AFLO3B80605	NA	NA	NA	NA	NA	NA	PTHR33626	FAMILY NOT NAMED	NA	NA	NA	NA	NA	NA	NA	NA	NA	NA	NA	NA	NA	NA	NA	NA	NA	NA	NA	NA	NA	NA	NA	NA	NA	NA	NA	NA	NA	Y	NA	1	NA	NA	NA	NA	NA	NA	ATGGTATCTCGAAGGCCCTCGGCTTCGGTCGGTGGGTTTTTACTACCAACGTACAAACAAATCTTCTTAGAGGAACAGGCGGCTTCTAGCCGCACGAGATTGAGCAATAACAGGTCTGTGATGCCCTTAGATGTTCTGGGCCGCACGCGCGCTACACTGAAGGAATCAGCGTGTTTTCCCTGGCCGAAAGGCCCGGGTAACCCGCTGAACCTCCTTCGTGCTAGGGATTGGGGCTTGCAATTATTCCCCATGAACGAGGAATTCCCAGTAAGCGCGAGTCATAAGCTCGCGTTGATTACGTCCCTGCCCTTTGTACACACCGCCCGTCGCTACTACCGATTGAATGATTTAGTGAGGTCTTCGGACTGGTGCGCGGCCAATGTCTCGGCATTGCCGATG…
160	AFLO3B80215	NA	NA	NA	NA	NA	NA	PTHR32093;PTHR32093:SF71	FAMILY NOT NAMED;SUBFAMILY NOT NAMED	NA	NA	NA	NA	NA	NA	NA	NA	NA	NA	NA	NA	NA	NA	NA	NA	NA	NA	NA	NA	NA	NA	NA	NA	NA	NA	NA	NA	NA	NA	NA	3	NA	NA	NA	NA	NA	NA	ACTCCAAGAATTCGAAGGGAGCGCAATCGATCGGTGTGATGTACGACGCCAGCAAGAAGAAGAAGAAGAAGAAGAAGAAGAAGAAAAGAGGAACAAGAAGAGGAAAAACGAAGAAGAAGAAGAGAAGTAATAAGAAGAGAAAGAAGAAAAGAAGAAGAGGAACAAAAAAGAGGAAGGAGGAGAAACAAGAAGAAGGAGAGGAACAAGAAGAGGAAAAAGACGAAGAAGAAGAAGAAGAAGAGAAAGAAGAGGAACAAGAGGAAGAAGAGGAGGAGGAAGAGGAAAAAGAAGAGGAGCAACAAGAGAAAGAAGAAGAGGAACAAAAAGAGGAAGGAGGAGAAGAGGAGAAAGAAGAGGAAAAAGACGAGGAAGAAGAAGAGGAGGAACGAGAAGAAGAGA…
161	AFLO3B81442	NA	NA	NA	NA	NA	NA	PTHR30050;PTHR30050:SF14	CHROMOSOMAL REPLICATION INITIATOR PROTEIN DNAA;SUBFAMILY NOT NAMED	NA	NA	NA	NA	NA	NA	NA	NA	NA	NA	NA	NA	NA	NA	NA	NA	NA	NA	NA	NA	NA	NA	NA	NA	NA	NA	NA	NA	NA	NA	NA	1	NA	NA	NA	NA	NA	NA	ATGGATGATATTGGCGCTGAAAATTTGAGCCAGTGGTCACGCGATGAAGTTTTAGCTGTTATTTTGCAATCAAGAATGGATAATCAACTACCGACATTTTTCTCTTCCAACTTTTCAATGGATGATTTGGAAGAGCACTTTAAAGAAACCAAAAATGCCATTGATCCAATTAAGGCTGCCAGATTGATGGAACGAGTACGTACTTTGGCTAAAGAAGTCATTGTTCTGGACCAAACAGGCGACGTTAAGATTATTTTGATTCTTGTTGAAAAAGGGCCTAGTGCGCGAGTTACAAGA
162	AFLO3B12618	NA	NA	NA	NA	NA	NA	PTHR28576;PTHR28576:SF12	FAMILY NOT NAMED;PIGGYBAC TRANSPOSABLE ELEMENT-DERIVED PROTEIN 4	NA	NA	NA	NA	NA	NA	NA	NA	NA	NA	NA	NA	NA	NA	NA	NA	NA	NA	NA	NA	NA	NA	NA	NA	NA	NA	NA	NA	NA	NA	NA	4	NA	NA	NA	NA	NA	NA	ATTTGTATAATAACAGCTGAAGTTAAGAAACCAACAATTCAAATGAATTGGTCTAAGAGAATAATTATAAAAATTCCAATTTTCAGAAAAATATATCTGCAAATAAATAGATGTTTGCATTTTGCAAGTAACCAATCGTTTAATCTATTGAAAAGGATGAGAATAAAATTTTATAAATTATGTGAGTCAAAATTCGGTTACTGCTATGACTTTAAAATATTCACCTTATATTTAGACAGCTGGTACTCTTCACCAAAACTATTTAAAACTTTAATTAATAATAAAATCAACGTTGTTGGAACAATGCGCTCGAAAAAATACGGTCAGCCTAGTCGATTCGCGAGTCGCACTTTGCGTGCGAACACCGCCTCTTTGTTAGGTCTATTAGGAAAGACATGT…
163	AFLO3B23197	NA	NA	NA	NA	NA	NA	PTHR23304;PTHR23304:SF149	SPOT2-RELATED;SUBFAMILY NOT NAMED	NA	NA	NA	NA	NA	NA	NA	NA	NA	NA	NA	NA	NA	NA	NA	NA	NA	NA	NA	NA	NA	NA	NA	NA	NA	NA	NA	NA	NA	NA	NA	1	NA	NA	NA	NA	NA	NA	ATGATTGCTTTCATATCCTCGAGATATCTTAATTCCACTCCCAGAACGTCTATACGACATGTTTCGTACATACATACATACATACATACATACATACATACATACATACATACATACATGCATGCATACATACATACATACATACATACATACATACATGCATGCATGCATACATGCATACATACATACATACATACATACATAGATACATACATACATACATACATACATACATACATGCATGCATACATACATACATACATACATACATACATACATACATACATACATACATACATACATACATACATACATACATACATACATACACATACATACATATACATACATATACATACATATACATACATATACATACATACATACATACATACATAC…
164	AFLO3B80345	NA	NA	NA	NA	NA	NA	PTHR23022;PTHR23022:SF97	TRANSPOSABLE ELEMENT-RELATED;TRANSPOSABLE ELEMENT TC1 TRANSPOSASE	NA	NA	NA	NA	NA	NA	NA	NA	NA	NA	NA	NA	NA	NA	NA	NA	NA	NA	NA	NA	NA	NA	NA	NA	NA	NA	NA	NA	NA	Y	NA	2	NA	NA	NA	NA	NA	NA	ATGAAAGGTGGTAGTGGATCGATACTTATTTGGAATGTAATGAATGATATAGATCCTATTCATAGAATACAGGGAATCATGATATTGCTACCATATACAAAAAGATATCTGGGAAATGATTGGATTTATCAAGCAAATAATGACCTAAAGCACATAGTACGCCTTGTTAAAACATTTTTATCTGACCAAAACATTAACTGTTTAAAATGGCCGGCACAATCTCCCGATCTGAATCCCATTAAGATGTTATGGATTGATGTAGAATAA
165	AFLO3B83017	NA	NA	NA	NA	NA	NA	PTHR23022;PTHR23022:SF97	TRANSPOSABLE ELEMENT-RELATED;TRANSPOSABLE ELEMENT TC1 TRANSPOSASE	NA	NA	NA	NA	NA	NA	NA	NA	NA	NA	NA	NA	NA	NA	NA	NA	NA	NA	NA	NA	NA	NA	NA	NA	NA	NA	NA	NA	NA	Y	NA	2	GO:0002121 GO:0007476	inter-male aggressive behavior;imaginal disc-derived wing morphogenesis	NA	NA	NA	NA	ATGCCAGATCATCCGCAATTACCGCTCGTGAAAAACGCGCAATTATACGTGCCGCGAGGTCTAAAAAAGATTCACAAGGAGTATCGTTTAAATTTTGAAAAAGAGCACATTCGATGGAACAAGAAATGGAGAAAAGTAATATTTTCTGACGAGAAACGATTTAATTTAGATGGACCAAATGGATTCAACTATTATTATCACGACGTAAGAAAAGAAAAATTATTGCAAGTACGTCGACAAATGAATGAAGGGAGCATTATGCTTTGGGCCGGAATTGGCTATAAGGAAAAAACAGATTTACTATCAATCAGCATCAAGATGAATGCCACTGTTTATTGTAATTTGTTACAAAAACAAATAACTAAATATGCGAAAAATATTGCGGCCGATAATTTTATA…
166	AFLO3B83019	NA	NA	NA	NA	NA	NA	PTHR23022;PTHR23022:SF97	TRANSPOSABLE ELEMENT-RELATED;TRANSPOSABLE ELEMENT TC1 TRANSPOSASE	NA	NA	NA	NA	NA	NA	NA	NA	NA	NA	NA	NA	NA	NA	NA	NA	NA	NA	NA	NA	NA	NA	NA	NA	NA	NA	NA	NA	NA	Y	NA	2	GO:0002121 GO:0007476	inter-male aggressive behavior;imaginal disc-derived wing morphogenesis	NA	NA	NA	NA	ATGCCAGGCCATCCACAATTACCGCTCGTGAAAAACGCGCAATTATACGTGCCGCGAGGTCTAAAAAAGATTCACAAGGAGTATCGTTTAAATTTTGAAAAAGAGCACATTCGATGGAACAAGAAATGGAGAAAAGTAATATTTTCTGACGAGAAACGATTTAATTTAGATGGACCAGATGGATTCAACTATTATTATCACAACGTAAGAAAAGAAAAATTATCGCAAGTACGTCGACAAATGAATGGAGGGAGCATTATGCTTTGGGCCGGAATTGGCTATAAGGAAAAAACAGATTTACTATCAATCAGCATCAAGATAAATGCCACTGTTTATTGTAATTTGTTACAAAAACAAATAACTAAATATGCGAAAAATATTGCGACCGATAATTTTATA…
167	AFLO3B83606	NA	NA	NA	NA	NA	NA	PTHR23022;PTHR23022:SF97	TRANSPOSABLE ELEMENT-RELATED;TRANSPOSABLE ELEMENT TC1 TRANSPOSASE	NA	NA	NA	NA	NA	PF13358	DDE_3	DDE superfamily endonuclease	NA	NA	NA	NA	NA	NA	NA	NA	NA	NA	NA	NA	NA	NA	NA	NA	NA	NA	NA	NA	NA	Y	NA	1	NA	NA	NA	NA	NA	NA	ATGAAGAAAGAACAATACATTGAAATATTAAAAACAGACATGTTACCACATGCAATGCAAACCATGAGTAATTGGATATTTCAACACGATAATGATTCGAAGCACGCCTCTCGTGCCGTGCAAAATTGCTTAAGTCAAAATAACATCTTTAAGTGGCCGTCGCAAAGTTCAGATCTAAATCCGATTGAGCATATTTGGCAACATTTAAAATTGAATATTAGCAATGAAAAATTTCGAAATGCCACTGAGTTATATGAAAAACTCCGTGGCATTTCCCCTGTTATAATACAAAATTTTTTGAGATCTAGGCCGAAGAGGAAAGCAATTTAA
168	AFLO3B80545	NA	NA	NA	NA	NA	NA	PTHR23022;PTHR23022:SF90	TRANSPOSABLE ELEMENT-RELATED;SUBFAMILY NOT NAMED	NA	NA	NA	NA	NA	NA	NA	NA	NA	NA	NA	NA	NA	NA	NA	NA	NA	NA	NA	NA	NA	NA	NA	NA	NA	NA	NA	NA	NA	NA	NA	2	NA	NA	NA	NA	NA	NA	ATGGACACGAAAAGAAACGAATTAAGTGTAGAAATGCGTTCGCAAATTATTTATCGAAAGAAGAGTATTCTACCTGGAAGACTTAGAAAAACGACAGATGATCATCATATTATAACTATAAGCAAAAAAAATAGGAGGAAGATAGCTTCCGAAATTAATGGATGTGTTAAGGAGACAAAAATTTCGGTTTCAATAGTAAAAAGGTGTTTCTTGCGGAGGACGATCTCAGAGGTTGCAATTAAAAAACCATTACTAAAGAGACAAAATAAAAAAAAGAGGCTTCAAACTAAGTGCCATAAAAATTGGACATTGGAAGAGTGGGAAAAAGTATTATGGACCGATGAATCCAAGTTTGAAGTGTTTGGATTCAAGTGA
169	AFLO3B83732	NA	NA	NA	NA	NA	NA	PTHR22955;PTHR22955:SF47	RETROTRANSPOSON;T16H12.13	NA	NA	NA	NA	NA	NA	NA	NA	NA	NA	NA	NA	NA	NA	NA	NA	NA	NA	NA	NA	NA	NA	NA	NA	NA	NA	NA	NA	NA	NA	NA	1	NA	NA	NA	NA	NA	NA	ATGTCCATAACGGCACGACCACAATTTGATACCTTCGAGAGGTATTCAAATTATACGCGACTCACGCGAATTATCGCGTACTGCATAAAATTCTTCCGAGCGGTCCTCGCACGACTTTCGGGGCAAGAATCGACAGCCTCTACAGAGTCACACAACCACTCGGATCTCCTTCTCACCACTACAGAGATCGACCTCGCGGAGGGTGCCATCTTGAGGTGGCTACAGGCGCACACCTTTGCCAAGAAAATCGCGGACCTGAAGTTGGGGAGGGGACTGGTACGATTCAGCTCCCTGAGATGTCTGAGTTCCTTCCTCGACGAAAAGGGACTCCTCAGAGTTGGGGGGTGTTTGGAGCGGGCTGCACGAACATACAACCATCGACATTCAGTGATCCTTCCG…
170	AFLO3B81762	NA	NA	NA	NA	NA	NA	PTHR11117;PTHR11117:SF14	SUCCINYL-COA SYNTHETASE-RELATED;PROTEIN FDRA	NA	NA	NA	NA	NA	NA	NA	NA	NA	NA	NA	NA	NA	NA	NA	NA	NA	NA	NA	NA	NA	NA	NA	NA	NA	NA	NA	NA	NA	NA	NA	1	NA	NA	NA	NA	NA	NA	ATGCTTAAGACAGTAATCTTAAAGGATAACTATCAGGATTCAATTAATCTTATGCTATTGACGAATAAGATTAACGAGCTGGCCGATGTAGAAATGAGCCAGATCATGATGGGTACTGAAGCGAATAAGGATATTTTGGCTAATACTGGCTTGTTAACTGAGAAGGCTAAAACTGCATCACCCAATGATTTAATGGTAGTTGTTAGAAGTGATGACAATGAGGTTATGGATAAAGTTTTACCAACTGTTCAGTCATTCCTGGAAGATCTTTCTACTAAAAAGACTGAATCTGATGAAGACACAGTGGCGGTTGATAATTGGGATGATGCATTAAAGGCATTGCCAGATGCGAATTTGGCTCTATTTAGCATACCTGGAGAATACGGAGCTCCAGAAATG…
171	AFLO3B83588	NA	NA	NA	NA	NA	NA	PTHR10071;PTHR10071:SF236	TRANSCRIPTION FACTOR GATA GATA BINDING FACTOR;BOX A-BINDING FACTOR-RELATED	NA	NA	NA	NA	NA	NA	NA	NA	NA	NA	NA	NA	NA	NA	NA	NA	NA	NA	NA	NA	NA	NA	NA	NA	NA	NA	NA	NA	NA	NA	NA	4	NA	NA	NA	NA	NA	NA	ATGATGATACGCAATATAGCAATAGTGATCGCAATCGTACTTGAAGGGATGACGATGCCGGTGGTCAATAATAATAATAATAATGATGATGATAATGATGATGATGATGATGATGATGATGATGATGATGATGATAATAATAATAACAATTATAATAATAATAATAATAATAATAATAGCAGTAGTAGTAGTAGTAATAGTAGTAGTAGTAGTGGTAGTGGTAGTAGTAGTAGTAGTAGTAATAGTAGTAGTAGTAGTAATAGTAATAATAGTAGTAATAGTAGTAATAGTAATAATAGTAGTAATAGTAATAATAGTAGTAATAGTAGTAGTAGTAGTAGTAGTAGTAGTAGTAGTAGTAGTAATAGTAGTAGTAGTAGTAGTAATAGTAATAATAAT…
172	AFLO3B80385	NA	NA	NA	NA	NA	NA	NA	NA	NA	NA	PR01217	PRICHEXTENSN	Proline rich extensin signature	NA	NA	NA	NA	NA	NA	NA	NA	NA	NA	NA	NA	NA	NA	NA	NA	NA	NA	NA	NA	NA	NA	NA	NA	NA	NA	2	NA	NA	NA	NA	NA	NA	ATGGCGCTGTACGGAGGAGAGCGCGTAGCTGCTCCTGCAGCAGCACCACCACTACCACCACCACCGCCACCACCACTGCCGCCGCCACCACTACTACTACTACTACCACCACCGCCACCACCACCACCGCCACCACCACCACCACCACCACCACCACCACCACCACCACCATCGCCACCACCACCACCACCACCATCGCCGTCACTGCCATCAGCGTCATCAGCATCGCCAGCACCACCAGCAGCACCGGTATTAGCAGCGTTGCTTGCACCAGCAAGTAGATAG
173	AFLO3B81870	NA	NA	NA	NA	NA	NA	NA	NA	NA	NA	PR01217	PRICHEXTENSN	Proline rich extensin signature	NA	NA	NA	NA	NA	NA	NA	NA	NA	NA	NA	NA	NA	NA	NA	NA	NA	NA	NA	NA	NA	NA	NA	NA	NA	NA	2	NA	NA	NA	NA	NA	NA	GCCACCCTCACCACCCAAAACACCAGGACCACCATCACCTTTTCCACCACCACAACCAACAGAAACTCCAACTCCTGCACCACCTTTCCAACAAGGCTACCCTCACCACCCAGAACACCAGGTTATGATTATCCAGGACCACCATCACCTTTTCCACCAACACCAAGACCATTACCGTCACAGACACCTGGTTATAATTATCCATCCCCTCCGCGAACTCCAGCTCCACCTCCCCCTTATCCACCACAAACACCGCAGCCACGACCATCTACACCATACATACCTCCTCCTCCTTCTCGACCAAATTTGCCACCTGATGCGACACAGGGAATACCACCATTCCAGCATATACCCTCACTACCTTCTACATCACCAAAAACTCCATCTCCATATCCATCA…
174	AFLO3B81906	NA	NA	NA	NA	NA	NA	NA	NA	NA	NA	PR01217	PRICHEXTENSN	Proline rich extensin signature	NA	NA	NA	NA	NA	NA	NA	NA	NA	NA	NA	NA	NA	NA	NA	NA	NA	NA	NA	NA	NA	NA	NA	NA	NA	NA	1	NA	NA	NA	NA	NA	NA	AAACTACTACGGAAACTCCAACTGTCCCAACCACTACGACTACCGTAGTTCCAACTAGAACTGAAGAAACAACTGTAACCTCGACGTCACCGGTAACAACAACTACGCTAACAACTACGCCAATACCAGAAACTACTACGGAAACTCCAACTGTCCCAACCACTACGACTACGGAAGTGCCAACTACAACTGAGGAAACAACTGTAACCACGACAACGTCGCCGGAAACAACAACTACGCTATCAACTACGCCAACACCAGAAACTACTACGGAAAGCCCAACTGTGCCAACCACTACGACTACGGAATTACCAACTACAACTGAAGAAACAACTTTAACCACGACAAC
175	AFLO3B80872	NA	NA	NA	NA	NA	NA	NA	NA	NA	NA	NA	NA	NA	PF13479	AAA_24	AAA domain	NA	NA	NA	NA	NA	NA	NA	NA	NA	NA	NA	NA	NA	NA	NA	NA	NA	NA	NA	NA	NA	NA	NA	1	NA	NA	NA	NA	NA	NA	ATGATCGTTTTACCAAAACCGCAAAAATTAGAACCAAAGGCACAACCACACAATTTCTTCATCTGGGGTGCGCCAATGTCTGGCAAGAGCTACTTTGCTAGTTTTTTTCCGAATCCAATTATCCTAAACACTGATGGAAACAGTGATCAAGGAACTGCACCAGCATTTCAGATTAGGAATTTAAGAGACAAGAAAGGCAAGCCTACCCAATTAGTAACTGATCAATTGGATGAGATTATTTTAGCTTTACAGACTGAAAACCAGCAACGAAAGCCAGAAGAACAATTCAAAACGATTGTTGTTGACGTAAATTGA
176	AFLO3B25174	NA	NA	NA	NA	NA	NA	NA	NA	NA	NA	NA	NA	NA	NA	NA	NA	NA	NA	NA	NA	NA	PS51257	PROKAR_LIPOPROTEIN	Prokaryotic membrane lipoprotein lipid attachment site profile.	NA	NA	NA	NA	NA	NA	NA	NA	NA	NA	NA	NA	NA	NA	NA	4	NA	NA	NA	NA	NA	NA	ATGGACCCTACTCGAATCCTCCCCTTGCTCCGGGTACCAGTGTGGGGTACCGTTTTGTCGAGCGTAGCATATGGATGCAGCTCGACCACGCTGCATCAACGGCAAAGATTCACTGCGTCGAAAGTAAAGCGTATCAAATCATCAGGATGCGAGGAGAGTTCCATTCATCGAAAATCGGACGGATCGTTCTCGAAATGTGAAATCGAAAACTGGAACAACGGGCAGAAATTCAGGCCGCCACCAGAAAATCTCTGTCGCTCGAAGCGGAGAAACACTCGAGGGAGCCTCCCTCCACAACATAATCCTGTCGTTATATCTTGGTGCCAAGCTTACTGCAAATGTTGTATCGTAATGGAGCATCGTAAAAAGCTCGATGATATACAAATAACAAACAATTAT…
177	AFLO3B83204	NA	NA	NA	NA	NA	NA	NA	NA	NA	NA	NA	NA	NA	NA	NA	NA	NA	NA	NA	NA	NA	NA	NA	NA	NA	NA	SSF56672	DNA/RNA polymerases	NA	NA	NA	NA	NA	NA	NA	NA	NA	Y	NA	2	NA	NA	NA	NA	NA	NA	ATGGCTAGCAAAAAAGTAAAAGAAGATTCATTAAGCACAGCAACCACTGTTAGCCAAGATATACAAGCATTAATAAACGCCTTACAAGAGCAAAATATGAGACACGCAGAAGAAATTAGAAAAATGCGACACATAGTAACCGCAGATGGAGTAAAACCAAACCTCAAGAAAATCGAAGTTGTGAAAAACTTTGAAACAATAACACCCACCGAAGTAAAATCTTTTTCTGGACTCGCCGGATATTACGAAAAATTTATACGAAATTCTAAAATAGCTAAACCATTAACCGAACTTAGAAGAACACACCTTACCATTGGACCAAAGACTAACAGAATAGTTTAG
178	AFLO3B81391	NA	NA	NA	NA	NA	NA	NA	NA	NA	NA	NA	NA	NA	NA	NA	NA	NA	NA	NA	NA	NA	NA	NA	NA	NA	NA	SSF53697	SIS domain	NA	NA	NA	NA	NA	NA	NA	NA	NA	NA	NA	1	NA	NA	NA	NA	NA	NA	ATGCAATTGTTAGCACAAGCTAAAGTTGCTGTTAGTAATGGCGTTAAGGTAGTAATAATTACTACTGATGTGCATTCTCCCTTGGCTAAGGTAGCAGATACAGTAATTAAGATTGCTGCGCAATCTAAAGTTTCACAAACTACTTCTCTGCAACCAATGGGTTCATTATTGAACAGATGTCATTATTATTATTTGATGCAATTTCGCTTAAATTGA
179	AFLO3B10011	NA	NA	NA	NA	NA	NA	NA	NA	NA	NA	NA	NA	NA	NA	NA	NA	NA	NA	NA	NA	NA	NA	NA	NA	NA	NA	NA	NA	NA	NA	NA	NA	NA	NA	NA	NA	NA	NA	NA	3	NA	NA	NA	NA	NA	NA	ATGAGAAAAGGCAACAGCAACAACGCGCAACCCGATCACGGAGAAGTGTGGATTACAATCAGTGGCTCGAGGAAGGGCCAGCACGCGGGGAACGACGACGAGTCGAAGCGGGTTGATTGCACCGCAAATATTGACGTGGCTAATTCTCCCTCGCCCCCTTGGTTTACCTATCCAAGAAAGCTTACCTACAACTATCGTAGACGTAAAATTGAAGATACGAAAAGGGCGATCTATCGTTCCCGAAATTCGTTCGACTTAATCTCGCAACGTGGATATCGTGGAATAATTTTGCTATCCGGTTACAACTCGGTCGGTGGAAATAAAAATGCAGTTTCGAAGGGGATGATCCCCGGCACGATTCGTTATATCGAATTCGCATCGATATTCGGGACGGTCCAT…
180	AFLO3B10012	NA	NA	NA	NA	NA	NA	NA	NA	NA	NA	NA	NA	NA	NA	NA	NA	NA	NA	NA	NA	NA	NA	NA	NA	NA	NA	NA	NA	NA	NA	NA	NA	NA	NA	NA	NA	NA	NA	NA	1	NA	NA	NA	NA	NA	NA	ATGGCGACGTGGAGGTGGACACACGATCCCATCCGCGGACTCGCGCCGAGTTTCCAGCCCACTTTTGCCTCGCGCGGCTTAATTACGTTCCAGCCGCGGCGAGGATCCCGCTTTGATCTCGCCGGTCTGATTGTGACAGCCCGAACAGAGGCGGGCGGGAAGATTTGCGGCACGTTTGTTTTGTTCGTTGGAACCACGGTCACGCGTGTGCCGAGATCCGGCCACAATCCGGAGACGGGTTTCCACCAGACGTGA
181	AFLO3B10013	NA	NA	NA	NA	NA	NA	NA	NA	NA	NA	NA	NA	NA	NA	NA	NA	NA	NA	NA	NA	NA	NA	NA	NA	NA	NA	NA	NA	NA	NA	NA	NA	NA	NA	NA	NA	NA	NA	NA	2	NA	NA	NA	NA	NA	NA	ATGGAACAATTTGGCGGTTGCAAATTCATCGGTATCCTCGAAGAAAGAGAGATATTCTCGAGCGAAGAAATCGTCGACGGGGAGGAAGAGATTTTTAGATCCGGTCGCTCCATTCGTCAAGATTTTTCCCCACCGCGAATCGTGAGTTGTTGGGGGGGAGGAAAAATCGTTGGAATTGGTACGCATGGCGGATCCTCGGCCAAGCAGCACAATACCACCTCCTCCTCTCCCCCTCGTGCGGAAACTCGTCGTCCAGAGATGCCCGGCTGCAAAACATCGGCTGCGTCCCTCGCTAAACCCGGCGACGTCTACGCGGAGGAAGGGGAGAGGAGGAGGGAGTTTTCTGTTTTGCCGGAACTACTTTCCCGGAAGAGCTTCTTGTCTCATTTTTCGCCCCGC…
182	AFLO3B10014	NA	NA	NA	NA	NA	NA	NA	NA	NA	NA	NA	NA	NA	NA	NA	NA	NA	NA	NA	NA	NA	NA	NA	NA	NA	NA	NA	NA	NA	NA	NA	NA	NA	NA	NA	NA	NA	NA	NA	1	NA	NA	NA	NA	NA	NA	ATGCGTTATCACCTGACGCGTTGTCCCGACTCGGAAGCGAAGGACGAAGAAGAGGAGCGACAGGTGTGCTGCGAAGATTCGTGGAGAGAGAGAAGGATGGGCCCGATAGCGGAGGAGGCGAGTATAGTCGGACGTCTCGCAGTAATTAGGCAAGCTAATCACCCTCGGGCATGTTATCTTAATGGCCGCCGTTATGCCGTGACATCACAACTACCCTTGTCTACCCGGCAGTTTAATTGCTCCGATAGGTCGATGCACCGCCGCTCTCCGTGGAATATCGGGCCACTGTCGATGGGCCTCCGACAATGGCCGCGTCCCAATGTGGAAGCTATATGGAAAACGCACGCGCGTGAAAAGCGATCCCAATTTCCTCCGCGAATTGCGACTCCCCTCGCGAGA…
183	AFLO3B10016	NA	NA	NA	NA	NA	NA	NA	NA	NA	NA	NA	NA	NA	NA	NA	NA	NA	NA	NA	NA	NA	NA	NA	NA	NA	NA	NA	NA	NA	NA	NA	NA	NA	NA	NA	NA	NA	NA	NA	6	NA	NA	NA	NA	NA	NA	ATGTGCGCGGATGCGGATTTACTTGCGAAGGAGACCGTCTGCAAAGGGGAGAAATTTCTGACCAGGTTTTCCAGGCAACGTGGAAACGGGGTTGGGAAGGCGGACGGAGGAATGGGGAAAAGGGAGGGAGGATCGGGAAATGGAGCAGTTGAGCAGAACGAGAAGGAACGACGTGGTTCGTTAACGCTTTCATTGGAGAGCGATTCTTCACAAAGCCAATATAACCGGGGCTGGCCCCTGTTCTCATTTCAACCCCCGGCTCGGTACACAGCCACTGCAACCGGTTACGTTTATCCGGCAGAGGAGGCCTCCTACGGCCCGTGTGATTCGCTTAAGTCACCAACCACGAGGGGGCAGGGAATACACGTTAATGGCGTTTTCACGACCCCCGATATTTTC…
184	AFLO3B10017	NA	NA	NA	NA	NA	NA	NA	NA	NA	NA	NA	NA	NA	NA	NA	NA	NA	NA	NA	NA	NA	NA	NA	NA	NA	NA	NA	NA	NA	NA	NA	NA	NA	NA	NA	NA	NA	NA	NA	4	NA	NA	NA	NA	NA	NA	ATGCGAGAACCGCGTTTGTTATCGGCTTTTCCCGGGCGAAAATGGGTCGAGACGCGGCAGATCCGCGGCTTCGCCTGGAACCCCGGCTTCCACCTCCTCGTCGCATCCTGCGATTCGCGCCCCCCTCGAAATTTCACGGAGGATTCGGGTCGTGCGAATTCTGAAATCGCAGGAATCGAGATAATTATTCGTCGAATCCCTTTAAAAGGGATCTTCGAGACGAAAGAATGGATCGGTGATCCACAGGGGTGCCCGAATCTGGCCAATAAATCGGTGATCTCTGATTATAATCGTTTCCATTATCACCTCTCGGAGGGGAATCTTTTAACGACGATTACCTTCAACGATTTGCGTATCGGTCGATCCACGAAGAGCAAACGTATCATCGCCGCGCGATGT…
185	AFLO3B10019	NA	NA	NA	NA	NA	NA	NA	NA	NA	NA	NA	NA	NA	NA	NA	NA	NA	NA	NA	NA	NA	NA	NA	NA	NA	NA	NA	NA	NA	NA	NA	NA	NA	NA	NA	NA	NA	NA	NA	2	NA	NA	NA	NA	NA	NA	ATGTCTACCTCTGCCTTGGCCTATCCACTGGCAAGTAGAGTTGTCGGTGATTGGTCCGTCAGTCACGTGGACGGCGCTCAAGTGATCACGACCGATATTGGTCAGCGCGAGGACGATAAGGACGAGGATCCACCGATGATCACCGGGACGATAATAATAACGACGATCGTGTGGGTGATCGGCGTGACGAGGATCGGCGACAATGAGACCGTCGCCCACGTGCGAGCAACCCTCGCGACGATAACGGAAGGGGAAGGATCGAGAGGGAGGAAGGGAGGGAGGGAGGGAATGAATGAACGAGTCATCGATCGAATTGTTATTAGGCGAACCATATTGGACGAGCCTGGGTCACCTGATGCACGTGGTGGTGCCGTCACCCCCCGTGGTGGATTAGTGTCT…
186	AFLO3B10021	NA	NA	NA	NA	NA	NA	NA	NA	NA	NA	NA	NA	NA	NA	NA	NA	NA	NA	NA	NA	NA	NA	NA	NA	NA	NA	NA	NA	NA	NA	NA	NA	NA	NA	NA	NA	NA	NA	NA	2	NA	NA	NA	NA	NA	NA	ATGATTTCGGAAAGTTGGCTCGTTGACGCGCGAGGCCTCGGCGTCTATGCAATTCCGCAGGAAAACTGGGGCAACGCCGCCAGCAGAACCTATGTCGCCGCAGCGAGGAGCAACGGCCAACTTCACCGCCGGCCACGAACCGACATCACCGCGAACGAGATTACGCAGGTGGCGCCAGGCTCGCGTCAAAAATATCCCGAGGAGGATTCTCGGTTCTGGAGAACTCGGGTGAAGAATCGGGGAGATGTGGATGGTCGAGAAACTTTTTCTAGGAGACGAATAAGAGGGGAATCGGAAAAGAGTATTCGAAAGTTGGAAGCGTAA
187	AFLO3B10039	NA	NA	NA	NA	NA	NA	NA	NA	NA	NA	NA	NA	NA	NA	NA	NA	NA	NA	NA	NA	NA	NA	NA	NA	NA	NA	NA	NA	NA	NA	NA	NA	NA	NA	NA	NA	NA	NA	NA	3	NA	NA	NA	NA	NA	NA	ATGGACAAAAGTGCGACTCTCTCGTCACACATCTGCGACAGTGTCCGCGCATTGGCCGCAATAAATTTTGCAACGTCCTCGGAGGAAGCACGGACGAGCGAAACTTCTCATAAACCACCCCTCCCCGATTCTCTTCTCATTTTTCCACGCGCAAGGGAAACAGGATCCCGCGTGGTGGCGTCTAGGTGGTGGCAGGCAATAATGGCTTGGGCCGAGTTTTATAGGTGCAGCAGCAGTCGGCGAACGCCGCATAAGGGGCCAATAAGGCGGCTCTCTGAATTTCACCCGAGACGAAATTACATTCCGGCCAAGGTGGAGCACTGGACTTGCGTCCACGTGGAATGCGGCCGAGGATTTTCCAGGGGGGCCGCAATTAGCCCGCCTCGATTTTCCTTCTCG…
188	AFLO3B10066	NA	NA	NA	NA	NA	NA	NA	NA	NA	NA	NA	NA	NA	NA	NA	NA	NA	NA	NA	NA	NA	NA	NA	NA	NA	NA	NA	NA	NA	NA	NA	NA	NA	NA	NA	NA	NA	NA	NA	2	NA	NA	NA	NA	NA	NA	ATGTTTCGAACGGAAGTGGTGAAACTCGACGCAGGTTTTGAGAACGAAGGCCAAAGAGAAGAGAACGAGGACGAGGACGAGATTAAAGGAGGTTCGAGTTTTCTCGGAGGCGAGAAAGGATGCTTGCCGTTAGCAAGATTAATCGAGAACGTTCTTTTTTCTGAAATTTTGGGCGACGTCACAGTGGATAATCGGACGCGATTTCTTCCTTACCTTGGCCACTCTTTGATTAACCCTGTTAGGAGTCGGAACAGGATGGGTAGCGTTGGATTAGGTTTAATAATGGAAAGCTTAAGCTTCGCCTCCACGACGCTTCGATATTAG
189	AFLO3B10067	NA	NA	NA	NA	NA	NA	NA	NA	NA	NA	NA	NA	NA	NA	NA	NA	NA	NA	NA	NA	NA	NA	NA	NA	NA	NA	NA	NA	NA	NA	NA	NA	NA	NA	NA	NA	NA	NA	NA	3	NA	NA	NA	NA	NA	NA	ATGGATTCGTTAGCGAGCACGGTTTACTTTCGAAACGTTCCTGTTGGCCGAAACGCGGGCAAATTCGGCCGAAATATTAAAGAAGATCCGGTCGGTGGAGCGGGGGGACCCGTTAACACCCTTGGACGGGTCGTTGGAGGAGCGATGATCGTGGCCTTTGAACGGGATACGCACGTACACACGCGCTCGATGGAATCGTCGAACGCCGGTTGGCGGCGCGCGCTCCGTGCTTCCGGCTTCCCCGATAACACCGCGATGCGACGTAATTATGTTTGA
190	AFLO3B10077	NA	NA	NA	NA	NA	NA	NA	NA	NA	NA	NA	NA	NA	NA	NA	NA	NA	NA	NA	NA	NA	NA	NA	NA	NA	NA	NA	NA	NA	NA	NA	NA	NA	NA	NA	NA	NA	NA	NA	1	NA	NA	NA	NA	NA	NA	ATGACTACGCAAGCGCGCGTCAACGCTGAAAATATTTACACAGAAATTCTTTCCATAACACGGAGACGTGGCGACGATATTTTCAGGATAAGATCCAGCGGAACGGGTTACGTAAGGGGACGTCTTGAACACGGCGCGTGGAACAATACGTGTATGCATGACTGGCCGTTTAATTCGCGAGGCCATTTTCTACGCGAGGGAAACGACGTGAAATGCACGGCGGTGACGCAACGACAACAGAGAGACAAACGAGCGCCGGCGGATGCGCGGCCATCACGGCTAATTACGCCGATCAATCCGCGATTCCGTCGAAAATTACCGTTCCAACCAGCGTTTCGTCGTGTTGTACGCCTCGGATCGAGCGATAACGCGTTTGCAAATTTGCCGGCTCGTCAAATT…
191	AFLO3B10078	NA	NA	NA	NA	NA	NA	NA	NA	NA	NA	NA	NA	NA	NA	NA	NA	NA	NA	NA	NA	NA	NA	NA	NA	NA	NA	NA	NA	NA	NA	NA	NA	NA	NA	NA	NA	NA	NA	NA	1	NA	NA	NA	NA	NA	NA	ATGACTACGCAAGCGCGCGTCAACGCTGAAAATATTTACACAGAAATTCTTTCCATAACACGGAGACGTGGCGACGATATTTTCAGGATAAGATCCAGCGGAACGGGTTACGTAAGGGGACGTCTTGAACACGGCGCGTGGAACAATACGTGTATGCATGACTGGCCGTTTAATTCGCGAGGCCATTTTCTACGCGAGGGAAACGACGTGAAATGCACGGCGGTGACGCAACGACAACAGAGAGACAAACGAGCGCCGGCGGATGCGCGGCCATCACGGCTAATTACGCCGATCAATCCGCGATTCCGTCGAAAATTACCGTTCCAACCAGCGTTTCGTCGTGTTGTACGCCTCGGATCGAGCGATAACGCGTTTGCAAATTTGCCGGCTCGTCAAATT…
192	AFLO3B10079	NA	NA	NA	NA	NA	NA	NA	NA	NA	NA	NA	NA	NA	NA	NA	NA	NA	NA	NA	NA	NA	NA	NA	NA	NA	NA	NA	NA	NA	NA	NA	NA	NA	NA	NA	NA	NA	NA	NA	1	NA	NA	NA	NA	NA	NA	ATGCAGTTTAAAAAATCGTTAGGAAAAATCGTTGCGCCAACGATACAGAAGAAGATCTTGAACGAGAAAACGATCGATTCGACCAGCTCCATTTCTTTTCCCAATCGTATCTTATCTCTCCCTGTCGCGATCGCTGTTCCATTTAATATTATCAAAAAGGATACATTTGCGAAAGAAACTCCATTCTTCGAGGATCTTCTCTTAACCAAAGACACCGTTGAGGGGCGAACTCGGCGGCAAACAGTGATGACGTCAAAATCTCGTTACTTTATCGAGGCCTCCGCATCGATGATCGCTCGATTCGCTCGAGGCAACGTCTGCGAGCGCATCGTCGATCACCTATCCCCTCACCCTCTTCTCGGGAATTTCGTATTCGAGTGCGACGGACGGAGCTTGAAT…
193	AFLO3B10095	NA	NA	NA	NA	NA	NA	NA	NA	NA	NA	NA	NA	NA	NA	NA	NA	NA	NA	NA	NA	NA	NA	NA	NA	NA	NA	NA	NA	NA	NA	NA	NA	NA	NA	NA	NA	NA	NA	NA	3	NA	NA	NA	NA	NA	NA	ATGGGCGCAGACGGAACGGAAATCGGAGGCACGGGTCGATTAGGTCGGTATAGGCCTCGGAGCGGCAGTGAACCGATCGAAAGGCTGTCGCGTAACAGCGGCGGTCCGGGGTGGTGTGCTATGTCAGGTCCACGGAGTGAACGTTACAATAGAATTTGTTACGCGTACAACTACTACGGGGAACCCTCGAGGGAACCCACGTTCCCCGAACGATTTCGAATTTTGCCCGAGCAGTTTGACGTTCCGGAACGATCTCGCAACGATCATTCCCAACAAAGATTCCCGATTCCCGATTGTTGCTCAAGATTCAATTTCGAGTGTTTAGAACGATCGAAACGAATCCCATCCGTGTTCTTCCATCCGAAACGTATCGCGGCGTGGTTAATCGTTGGTTCGGTT…
194	AFLO3B10107	NA	NA	NA	NA	NA	NA	NA	NA	NA	NA	NA	NA	NA	NA	NA	NA	NA	NA	NA	NA	NA	NA	NA	NA	NA	NA	NA	NA	NA	NA	NA	NA	NA	NA	NA	NA	NA	NA	NA	2	NA	NA	NA	NA	NA	NA	ATGCCACCACCGTCTCTCTGCCCGGCCTTCGTTCATCCTCTTGCCCTTTCTCTGTCTCGCGCGGAGCATCTGCCGAGGGACGATGACAGACTGGACAGAACGATAGAATCCGCGATAAAGGCGGATTTCCAATGGAGAAGAGTTCGAAGGGGGAGAGATAACGTGGTGGCTGAAGACAATCTCGTCGAGCAACGCCTGTTGCTGAAGAATCGGCAGAAAGCCAAACTCCTCGTCAAGATCAAAGGGACACAAAGTTTCATCATCAACGAGAGCTTTCCAACGCGACGATTAGCTCTTTGTCGCGGGATGCTCCGGGACGGTCACAGTCATAATCGAAGGCCGTTGTTTGGACGAGGCGGTCTCTGCCGTGAGATCCGTCTCCCCGAAGGTCGACGACGA…
195	AFLO3B10142	NA	NA	NA	NA	NA	NA	NA	NA	NA	NA	NA	NA	NA	NA	NA	NA	NA	NA	NA	NA	NA	NA	NA	NA	NA	NA	NA	NA	NA	NA	NA	NA	NA	NA	NA	NA	NA	NA	NA	6	NA	NA	NA	NA	NA	NA	ATGGCACAGGGGAAACAACGAGGAAATTTAGCGGAAGACAAGAAAATAAACCGAAAGGAATCACAGTACATGGGGAGGAGAACTCGGTCCCGCGGGGAATGTGACCGGTACGGGCCCAGGGCAGGGGCCTGGAAGGGCTGTATCATGCACCGGGTGACCCCCGCTGGGTGCTTCTGTACCACGGCAAAAGAGGGGGTGTGGCACCCCTCGGGATCCTGCGGTCATCCCTACCCGTCGGCGGCCCTTAGAAGCGGTCGTGATTACGAGACGATCATCTTCCACTGGGCCGAGTTTCTATCCGAGTGGGATGGGCGAGGCCTTGAAGCAGGAAGGGTGGAAGGAATTTTCGTCGAGCTCCGTCTACGCCTCGTGAACCAGTACGCGGTTAATAGATACGTG…
196	AFLO3B10149	NA	NA	NA	NA	NA	NA	NA	NA	NA	NA	NA	NA	NA	NA	NA	NA	NA	NA	NA	NA	NA	NA	NA	NA	NA	NA	NA	NA	NA	NA	NA	NA	NA	NA	NA	NA	NA	NA	NA	2	NA	NA	NA	NA	NA	NA	ATGGACTCGTTTCGAAGTGTAACGGTATTAAATCGGAGAGAACGTGAATTTCTTCTAATTGGAGGGGCAATGGTAGTCGGTCAAGTTTATCGCAAGATCCATCCGAGGCAGACATACATCTTGCGAGCCTTGACCACGAGTCTTGACCTTGAATCACGACAAAAAAAAAGTTGCCACTCTCACGGGAGAATTGTTGGAGAAACGTCGAAAAGTCAAAGGATTTTAAGACGGACAATCGTCTCGTTTTTCAAAAGGAAGATAGTTGATGCACCTGGAGAAAACGAGCGTGTGAGGAACATTTGGCTGGCACGAGCTCCAATGCCGGCCGTGCACTTTTCCGTTCCGGTTGTCGGAGAACAATTGGAGACAATGGAGAGAGCACGTGGGAAAAGGAAAATC…
197	AFLO3B10152	NA	NA	NA	NA	NA	NA	NA	NA	NA	NA	NA	NA	NA	NA	NA	NA	NA	NA	NA	NA	NA	NA	NA	NA	NA	NA	NA	NA	NA	NA	NA	NA	NA	NA	NA	NA	NA	NA	NA	1	NA	NA	NA	NA	NA	NA	ATGGAGAAAAGTTCGGAACCGATTGGTTGGAGGATCTTTCGATCGATCGGGATTGCAAATTTTTCGGTAAGAAAGAATCACCGATCATCGAGAGGGAAAGTTGGAAAAACGAGAGCAAACGACTCGGGAGATGTTCGTCCTCGAGATGTCGACATAAATCTCGGCGCTGGCCGAGCTGAGAACAGGGCGAAGCCAATAGCTTCCCGAAAGTGCCGTTTGCGGAATCCCGATCCGACTGTCACAGATTTCACGACGCCTGTTTACGTTCCTCGTGAAAAATCGTCTTCCTATTTGGAAGGAGCGTGTGTTGGGCACATGGAGCGGAAGCGGGCCACAATGAGATTTATCCCGCGCACCGACCTATCCTCCTTTGTGTGCCTCCTCGTCGCTTCTTAA
198	AFLO3B10157	NA	NA	NA	NA	NA	NA	NA	NA	NA	NA	NA	NA	NA	NA	NA	NA	NA	NA	NA	NA	NA	NA	NA	NA	NA	NA	NA	NA	NA	NA	NA	NA	NA	NA	NA	NA	NA	NA	NA	2	NA	NA	NA	NA	NA	NA	ATGCCGTCCACGACATATTTATTGGCATCTCTATACACCACCGCTAAAACATTGCTCGTCCGCGGTTCCCCACAAATGAATAAAGTATTTCGTGGCTCTTTCGTGGTGGTGCCCGTGTCCCGTCTACGACCGGTGTTTTTTACCGTGCTGCGCGTGGACGTTTACAGCGCCGACGATTTTGCACTGGACCGTTTCGCCAATGATCGATGTCGAAATTACGCCAGAGGCCCAATGTCGAGACGGCGGTCGCCCGGCCTCGCTCGCCCTCCATTTGCGAATATTTTTAGGAAATCTCAAATTTTTTCAATAGTAATTTCGTTCAATCTCTTCTCTTCTCGAACGAAACGGGACGTTCTCGCTTTGAATTTATTGGATCGGAAAGGTGGTAATAATACGGTA…
199	AFLO3B10158	NA	NA	NA	NA	NA	NA	NA	NA	NA	NA	NA	NA	NA	NA	NA	NA	NA	NA	NA	NA	NA	NA	NA	NA	NA	NA	NA	NA	NA	NA	NA	NA	NA	NA	NA	NA	NA	NA	NA	2	NA	NA	NA	NA	NA	NA	ATGGGGAGGAGGAGGAGGACATTCATCGGTGACGGGGATGTTTTGCCGACCGTTCGGACGTCTATCCGTCGCGATCGGCGACCACCCGATGCGCCCCGTCTCCTCAACACGGTGCAAAAAGGACTTAAGCTCGTTGCTAACCGATCGCTGTCTCTCCCCCATTTATTTAAACGTTACTTTCTCCTTTCTTATCCGCCTGCCTTTCCGGGATACGGATACTTGAGCTCCTTTCGTTTCGCCCCCCACCTCTTCGTTTCACCATTTCTTCCTTTCACCATTCTACGAAAATTCGACCAATATATACATGGATGTGGATATGGAAACTCCTCTTTCTCCTTCTCCTCTTCGTTCCAATTTCGAATATCGTCCGCCTACGCGGTGGAGTATATCCACCATAAA…
200	AFLO3B10159	NA	NA	NA	NA	NA	NA	NA	NA	NA	NA	NA	NA	NA	NA	NA	NA	NA	NA	NA	NA	NA	NA	NA	NA	NA	NA	NA	NA	NA	NA	NA	NA	NA	NA	NA	NA	NA	NA	NA	5	NA	NA	NA	NA	NA	NA	ATGGGGAATGAACGTGTCAGAAGCAGCCCCCGGGGTCTAATTATGAGTTTGCACAGAGGGTTTCATCGCGACGGGCCAAATAAAAGACGGGAGAGGAGCGCGAGGCCGAGCGAAAAGGAAGAGAAGGAAGGAGGAAAGAGGGGTCACGAGTCGACGGAAAGTTCGGCCGGGCAATATCTCGCGGCGTGGACGGACAAAAAAGGGACACAATGCCGAGGGCAGGATCGATTCTCCTCGGTCGAGAGGATCACGGACAAGGAGGACGAGAGAGAGAGAGAGAGAGAGAGAAAGAGAAAGGCCGAGGAGGTTACGTGGCGCGAGGAGGGCCACATTGTTGTCGAAACGATGCTCACCGAAGAGGTTCGGGAAACAACGAGCCACCGTTTCCGTTCGATTCGT…
201	AFLO3B10172	NA	NA	NA	NA	NA	NA	NA	NA	NA	NA	NA	NA	NA	NA	NA	NA	NA	NA	NA	NA	NA	NA	NA	NA	NA	NA	NA	NA	NA	NA	NA	NA	NA	NA	NA	NA	NA	NA	NA	2	NA	NA	NA	NA	NA	NA	ATGCGCGCGATATTAGGGCAACACATTAACGCGGCGGTGCACGCGCAGGGTGTCGGCGTTCCCAGACGAAACGCAGCCCCCTTGGAGGCATGGTTAGAAAGGCAAGGCATTTGGAGATGGTCCGCTCGAAGACCTTCGATGGCGGGCACAAAAAGCCGAAGGGGGTGCTCTCTGAGTGCCAAAACGAAGGGACGCGAGGCTCGAGTGGCCGGGCTGGGCTCAGACCTTTCGACGGATGCAATTGACAAGTTGCCAAGAAGAAAATGGGAAAACGTTGTCCTTGCCGCTTTGTTCGCTTAG
202	AFLO3B10175	NA	NA	NA	NA	NA	NA	NA	NA	NA	NA	NA	NA	NA	NA	NA	NA	NA	NA	NA	NA	NA	NA	NA	NA	NA	NA	NA	NA	NA	NA	NA	NA	NA	NA	NA	NA	NA	NA	NA	2	NA	NA	NA	NA	NA	NA	ATGCGTGGGTTGATAAAACAGCCGCCAAGCAGTCTAGCATTCTCCCGCCTCGCTCCTCGTCTCTCCAAGGAATCTCGCCCCCTTCTTCCACCCTCTCGTGGCTCGTCTGCCTTGGCCCTGGTCGTCTGTCAACTTTGTCATTCACCGTTTCAACCCTGGGTTTGGGTGACGAAACGTCGTGAAAAGGGATCGGGTGACGCTAATCGATTGCGATCGATACCGCGGTTTCCCGATAGTTGGCCGGGGAACGAACGCATAGAAGGGTCTGGCTTACCTGGCCAGAAAAGCTTCCTGGTTTTGCGACTGCACGACGCCTTCGGTCTACGTGCACGCCGATATGCAGTTACTCAATTGCTGCGGTTGCGAAACAAATGGAGGGATTATTGTTTTACTATTCTT…
203	AFLO3B10177	NA	NA	NA	NA	NA	NA	NA	NA	NA	NA	NA	NA	NA	NA	NA	NA	NA	NA	NA	NA	NA	NA	NA	NA	NA	NA	NA	NA	NA	NA	NA	NA	NA	NA	NA	NA	NA	NA	NA	3	NA	NA	NA	NA	NA	NA	ATGCAGATGCGATTCAATGCCTGGCACGAGATACTCGGCCAAACTGGGAAGAGTAACGACCGCGTCAGCAACGAACAACAACAACCGGGCAACAACAACAGCAACCCTGGCTATCCCGATAACGCTCTGAGGAGGACCAACCGGGATGGTGCCGTCCGTTTGCGAGACAAGTGCGCAGAATTCGCGGAATTATTCGGAAAAACCGGGAATCCGAGGCGAATTACGAGACGGGTCGAGGAGGAACAAGGTGGAGGATATATCGTTTCTCCGGCATCTCTTCGAGTCATCGAGGCTATACCTTGGACGTGTTCTTCCTTTGGCGAGATTCACGGAATAAACCTATTCGATTCCCATATACGACATCCCGGAACTGGTGAGAAGCAGCGGGCCAAGATTCGC…
[truncated: 1,959 more rows]

## Sheet: Amel specific genes
Order	3B ID	NCBI GeneID	NCBI Symbol	NCBI Description	interpro_ids	interpro_names	interpro_descriptions	PANTHER_ids	PANTHER_names	PIRSF_ids	PIRSF_names	PRINTS_ids	PRINTS_names	PRINTS_descriptions	Pfam_ids	Pfam_names	Pfam_descriptions	ProDom_ids	ProDom_descriptions	ProSitePatterns_ids	ProSitePatterns_names	ProSitePatterns_descriptions	ProSiteProfiles_ids	ProSiteProfiles_names	ProSiteProfiles_descriptions	SMART_ids	SMART_names	SUPERFAMILY_ids	SUPERFAMILY_names	TIGRFAM_ids	TIGRFAM_names	TIGRFAM_descriptions	KEGG_ids	KEGG_names	MetaCyc_ids	MetaCyc_names	Reactome_ids	Reactome_names	Bombus	Contaminant	Max_num_exons	GO_BP_ID	GO_BP_Name	GO_MF_ID	GO_MF_Name	GO_CC_ID	GO_CC_Name	Coding Sequence
[truncated: 1,331 more rows]
[truncated: 3 more columns]

[truncated: 1 more sheets: GO Results]
